# Supplementary material for: Imino(silyl)disilenes: application in versatile bond activation, reversible oxidation and thermal isomerization
Source: Royal Society of Chemistry journal article supplement (doi:10.1039/d1dt01629f), 2021-01-01
Supplement: d1dt01629f1.pdf [file d1dt01629f1.pdf]

## Supporting Information

### Imino(silyl)disilenes: Application in Versatile Bond Activation, Reversible Oxidation and Thermal Isomerization

Richard Holzner,<sup>a</sup> Amelie Porzelt,<sup>a</sup> Umut S. Karaca,<sup>b</sup> Fiona Kiefer,<sup>a</sup> Philipp Frisch,<sup>a</sup> Daniel Wendel,<sup>a</sup> Max C. Holthausen<sup>\*b</sup> and Shigeyoshi Inoue<sup>\*a</sup>

<sup>a</sup>Department of Chemistry, Catalysis Research Center and Institute of Silicon Chemistry, Technische Universität München, Lichtenbergstraße 4, 85748 Garching bei München, Germany

<sup>b</sup>Institute for Inorganic and Analytical Chemistry, Goethe-Universität Frankfurt, Max-von-Laue-Str. 7, 60438 Frankfurt am Main, Germany

#### Contents

|                                                                                                                                                         |           |
|---------------------------------------------------------------------------------------------------------------------------------------------------------|-----------|
| <b>1. Experimental Section</b>                                                                                                                          | <b>3</b>  |
| 1.1 General Methods and Instrumentation .....                                                                                                           | 3         |
| 1.2 Iminodisilene I <sup>t</sup> BuN( <sup>t</sup> Bu <sub>3</sub> Si)Si=Si(Si <sup>t</sup> Bu <sub>3</sub> )NI <sup>t</sup> Bu ( <b>1</b> ).....       | 5         |
| 1.3 Iminodisilene I <sup>t</sup> BuN( <sup>t</sup> Bu <sub>2</sub> MeSi)Si=Si(Si <sup>t</sup> Bu <sub>2</sub> Me)NI <sup>t</sup> Bu ( <b>2</b> ).....   | 9         |
| 1.4 I <sup>t</sup> BuN( <sup>t</sup> Bu <sub>2</sub> MeSi)Si-PhCCPh ( <b>3</b> ) .....                                                                  | 16        |
| 1.5 I <sup>t</sup> BuN( <sup>t</sup> Bu <sub>2</sub> MeSi)HSi-SiH(Si <sup>t</sup> Bu <sub>2</sub> Me)NI <sup>t</sup> Bu ( <b>4</b> ) .....              | 19        |
| 1.6. Dioxadisiletane <b>5</b> .....                                                                                                                     | 22        |
| 1.7. Disilaoxirane <b>6-t/c</b> .....                                                                                                                   | 25        |
| 1.8. Radical Cation of I <sup>t</sup> BuN( <sup>t</sup> Bu <sub>2</sub> MeSi)Si=Si(Si <sup>t</sup> Bu <sub>2</sub> Me)NI <sup>t</sup> Bu <b>7</b> ..... | 29        |
| 1.9. Compound <b>8</b> .....                                                                                                                            | 32        |
| 1.10. Compound <b>9</b> .....                                                                                                                           | 36        |
| <b>2. X-ray Crystallographic Data</b>                                                                                                                   | <b>40</b> |
| 2.1. General Information.....                                                                                                                           | 40        |
| 2.2 SC-XRD structures .....                                                                                                                             | 41        |
| 2.3 Crystal data and structural refinement parameters .....                                                                                             | 45        |
| <b>3. DFT Calculations</b>                                                                                                                              | <b>47</b> |
| 3.1. General Information.....                                                                                                                           | 47        |
| 3.2. Calculated Structures .....                                                                                                                        | 48        |
| 3.3. TD-DFT calculations.....                                                                                                                           | 50        |
| 3.4. Mechanistic investigations for the <b>2-(Z)/2-(E)</b> interconversion.....                                                                         | 53        |

|                                                                             |           |
|-----------------------------------------------------------------------------|-----------|
| 3.5. EDA of <b>2-(Z)</b> and <b>2-(E)</b> .....                             | 55        |
| 3.6. LED of <b>2-(Z)</b> and <b>2-(E)</b> .....                             | 58        |
| 3.7. H <sub>2</sub> activation.....                                         | 60        |
| 3.8. Radical cation <b>7</b> .....                                          | 62        |
| 3.9. Mechanistic investigations for the <b>2-(Z)/9</b> interconversion..... | 63        |
| 3.10. NBO analysis.....                                                     | 64        |
| 3.11. QTAIM analysis.....                                                   | 68        |
| 3.12. Steric effects of the silyl ligands.....                              | 71        |
| 3.13. Calculated energies.....                                              | 72        |
| 3.14. Cartesian Coordinates (x,y,z) for the optimized structures.....       | 73        |
| <b>4. References</b>                                                        | <b>95</b> |

# 1. Experimental Section

## 1.1 General Methods and Instrumentation

All manipulations were carried out under exclusion of water and oxygen under an atmosphere of argon 4.6 ( $\geq 99.996\%$ ) using standard Schlenk and glovebox techniques. The glassware used was heat dried under high vacuum prior to use. All solvents were refluxed over sodium/benzophenone, freshly distilled under argon and deoxygenated prior to use. PTFE-based grease (*Triboflon III* from *Freudenberg & Co. KG*) was used as sealant. Deuterated benzene ( $C_6D_6$ ), toluene ( $Tol-d_8$ ) and THF ( $THF-d_8$ ) were obtained from Sigma-Aldrich, dried over Na/K alloy, flask-to-flask condensed, deoxygenated by three freeze-pump-thaw cycles and stored over 4 Å molecular sieves in a glovebox. All NMR samples were prepared under argon in *J. Young* PTFE valve NMR tubes. The NMR spectra were recorded on a *Bruker DRX400* ( $^1H$ : 400.13 MHz,  $^{13}C$ : 100.62 MHz,  $^{29}Si$ : 79.49 MHz), *AV500* ( $^1H$ : 500.13 MHz), or *AV500C* ( $^1H$ : 500.36 MHz,  $^{13}C$ : 125.83 MHz,  $^{29}Si$ : 99.41 MHz) spectrometer at ambient temperature (300 K), unless otherwise stated. The  $^1H$ ,  $^{13}C\{^1H\}$  and  $^{29}Si\{^1H\}$  NMR spectroscopic chemical shifts  $\delta$  are reported in ppm relative to tetramethylsilane.  $^1H$  and  $^{13}C\{^1H\}$  NMR spectra are calibrated against the residual proton and natural abundance carbon resonances of the respective deuterated solvent as internal standard ( $C_6D_6$ :  $\delta(^1H) = 7.16$  ppm and  $\delta(^{13}C) = 128.1$  ppm,  $Tol-d_8$ :  $\delta(^1H) = 2.08$  ppm and  $\delta(^{13}C) = 20.4$  ppm),  $THF-d_8$ :  $\delta(^1H) = 1.73$  ppm and  $\delta(^{13}C) = 25.4$  ppm).<sup>S1</sup> The following abbreviations are used to describe signal multiplicities: s = singlet, d = doublet, dd = doublet of doublets, dt = doublet of triplets, t = triplet, sept = septet, m = multiplet, br = broad. In some NMR spectra, signals from silicone grease ( $C_6D_6$ :  $\delta(^1H) = 0.29$  ppm,  $\delta(^{13}C) = 1.4$  ppm and  $\delta(^{29}Si) = -21.8$  ppm), originating from the cannulas used (*B. Braun Melsungen AG Sterican®*), can be observed. UV-vis spectra were recorded on a *Varian, Inc. Cary 50* spectrophotometer with a Schlenk quartz cuvette. EPR spectra were recorded on a *Jeol JES-Fa200 esr* spectrometer with a spectrometer frequency of 9.267 GHz (X-band). Simulation of the EPR spectra was performed with the *Easyspin* toolbox for *Matlab*.<sup>S2</sup> Quantitative elemental analyses (EA) were measured with a *EURO EA (HEKAtech)* instrument equipped with a CHNS combustion analyzer at the *Laboratory for Microanalysis* at the *TUM Catalysis Research Center*. Melting Points (m.p.) were determined in sealed glass capillaries under inert gas by a *Büchi M-565* melting point apparatus. LIFDI-ESI Mass spectrometry data were acquired using an *Exactive Plus Orbitrap* system (ionization method: LIFDI) by *Thermo Fisher Scientific*. Unless otherwise stated, all commercially available chemicals were purchased from *abcr GmbH* or *Sigma-Aldrich* and used without further purification. Hydrogen ( $H_2$ ) 5.0 ( $\geq 99.999\%$ ), oxygen ( $O_2$ ) 5.0 ( $\geq 99.999\%$ ), carbon dioxide ( $CO_2$ ) 5.0 ( $\geq 99.999\%$ ), dinitrogen monoxide ( $N_2O$ ) 5.0 ( $\geq 99.999\%$ ) and carbon monoxide ( $CO$ ) 4.7 ( $\geq 99.997\%$ ) were purchased from *Westfalen AG* and used as received. The compounds bis(*tert*-butyl)imidazolin-2-iminotribromosilane ( $(tBu)NSiBr_3$ )<sup>S3</sup>, supersilyl sodium ( $(tBu)_3SiNa \cdot 2THF$ )<sup>S4</sup>, bis(*tert*-butyl)methylsilyl sodium ( $(tBu)_2MeSiNa$ )<sup>S5</sup> and the functionalized trityl (fluoroaryl)borate [ $Ph_3C$ ][B(4-( $tPr_3Si$ )- $C_6F_4$ )<sub>4</sub>]<sup>S6</sup> were prepared as described in the corresponding references.

Potassium graphite ( $KC_8$ ) was synthesized following a literature reported procedure upon heating a 1:8 mixture of potassium and graphite in a thick-walled, PTFE-capped pressurize-able Schlenk flask to 500 °C until a homogenous bronze powder was obtained.<sup>57</sup>

The cyclic voltammetry (CV) measurements were performed in an Ar-filled glovebox (*MBraun*, oxygen and water content < 0.1 ppm). The electrochemical three-electrode glass cell was custom made with a gold (*Alfa Aesar*, 99.999% purity) working electrode (WE), a platinum (*Advent*, 99.99+% purity) counter electrode (CE), and a lithium (99.9%, foil, *Rockwood Lithium*, 0.45 mm thickness) reference electrode (RE). The electrolyte in the main and the CE compartment consisted of THF (*Sigma-Aldrich*) and 0.1 M tetrabutylammonium bis(trifluoromethane)-sulfonimide (TBATFSI). For the RE compartment a solution of 0.1 M LiTFSI in THF was used. The cell compartments were separated by porous glass frits. For the separation of the RE compartment a *Vycor 7930* frit (*Advanced Glass & Ceramics, Holden, MA*) was used in order to diminish the diffusion between the Li-ion containing RE electrolyte and the electrolyte in the main compartment. The electrodes of the cell compartments were connected *via* fused-in tungsten wires. Before the first CV was recorded, the high frequency resistance (HFR) of the glass cell setup was measured *via* Electrochemical Impedance Spectroscopy (EIS) and used for ohmic drop correction of the measured WE potential. At the end of the CVs, about 10 mg of ferrocenium hexafluorophosphate ( $FcPF_6$ , *Sigma-Aldrich*) were added to the electrolyte in the main compartment in order to calibrate the potential of the Li RE versus the  $Fc/Fc^+$  couple. The CVs were recorded using a *Biologic VMP3* potentiostat/galvanostat.

## 1.2 Iminodisilene $t\text{BuN}(t\text{Bu}_3\text{Si})\text{Si}=\text{Si}(t\text{Bu}_3\text{Si})\text{N}t\text{Bu}$ (**1**)

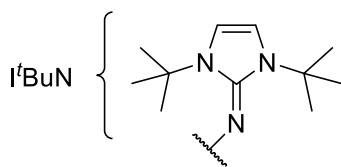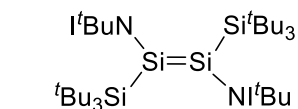

**1**

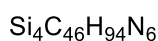

843.64 g/mol

A solution of  $t\text{Bu}_3\text{SiNa}\cdot 2\text{THF}$  (833 mg, 2.27 mmol, 2.10 eq.) in *n*-hexane (10 mL) was added to a suspension of  $t\text{BuNSiBr}_3$  (500 mg, 1.08 mmol, 1.00 eq.) in *n*-hexane (5 mL). The color changed to dark green. After filtration, compound **1** was obtained by crystallization from toluene at  $-35\text{ }^\circ\text{C}$  (251 mg, 297  $\mu\text{mol}$ , 55% yield). These crystals were also suitable for SC-XRD analysis.

**m.p.:** 161  $^\circ\text{C}$  (decomposition, color change to brown).

**$^1\text{H}$  NMR (500 MHz,  $\text{C}_6\text{D}_6$ , 300 K):**  $\delta$  [ppm] = 6.08 (s, 4H,  $\text{CH-N}$ ), 1.58 – 1.50 (m\*, 90H,  $t\text{Bu}$ ). \* The signal of  $t\text{BuN}$  overlaps with the signal of  $t\text{Bu}_3\text{Si}$

**$^1\text{H}$  NMR (500 MHz,  $\text{THF-}d_8$ , 300 K):**  $\delta$  [ppm] = 6.46 (s, 4H,  $\text{CH-N}$ ), 1.61 (s, 36H,  $\text{N}t\text{Bu}$ ), 1.26 (s, 54H,  $t\text{Bu}_3\text{Si}$ ).

**$^{13}\text{C}\{^1\text{H}\}$  NMR (126 MHz,  $\text{THF-}d_8$ , 193 K):**  $\delta$  [ppm] = 145.7 ( $\text{C}=\text{N}$ ), 110.5 ( $\text{CH-N}$ ), 57.2 ( $\text{NC}(\text{CH}_3)_3$ ), 31.3 ( $\text{Si}(\text{C}(\text{CH}_3)_3)_3$ ), 31.1 ( $\text{NC}(\text{CH}_3)_3$ ), 21.7 ( $\text{Si}(\text{C}(\text{CH}_3)_3)_3$ ).

**$^{29}\text{Si}\{^1\text{H}\}$  NMR (99 MHz,  $\text{THF-}d_8$ , 193 K):**  $\delta$  [ppm] = 74.3 ( $\text{Si}=\text{Si}$ ), 23.1 ( $t\text{Bu}_3\text{Si}$ ).

Note: The choice of the solvent seems to be crucial for the synthesis of **1**, as performing the reaction in THF instead of hexane results in the formation of an unidentified dark purple compound instead of **1**. Unfortunately, this species is not stable above  $-40\text{ }^\circ\text{C}$  and various trapping attempts were unsuccessful. Compound **1** is only slightly soluble in *n*-hexane, benzene and toluene, however, it shows good solubility in THF. No additional sets of signals for the (*Z*)-isomer were observed in the multinuclear NMR spectra of compound **1**. Similar to reports for disilenes **III** and **VI** the signal intensities in the  $^{29}\text{Si}$  NMR spectrum of **1** at room temperature are very weak. Therefore, the  $^{13}\text{C}$  and  $^{29}\text{Si}$  NMR spectra of **1** were recorded at  $-80\text{ }^\circ\text{C}$ .

**EA:**  $\text{Si}_4\text{C}_{40}\text{H}_{82}\text{N}_6$       Calculated [%]:      C (65.49), H (11.23), N (9.96)  
                                          Experimental [%]:      C (65.02), H (11.14), N (9.59).

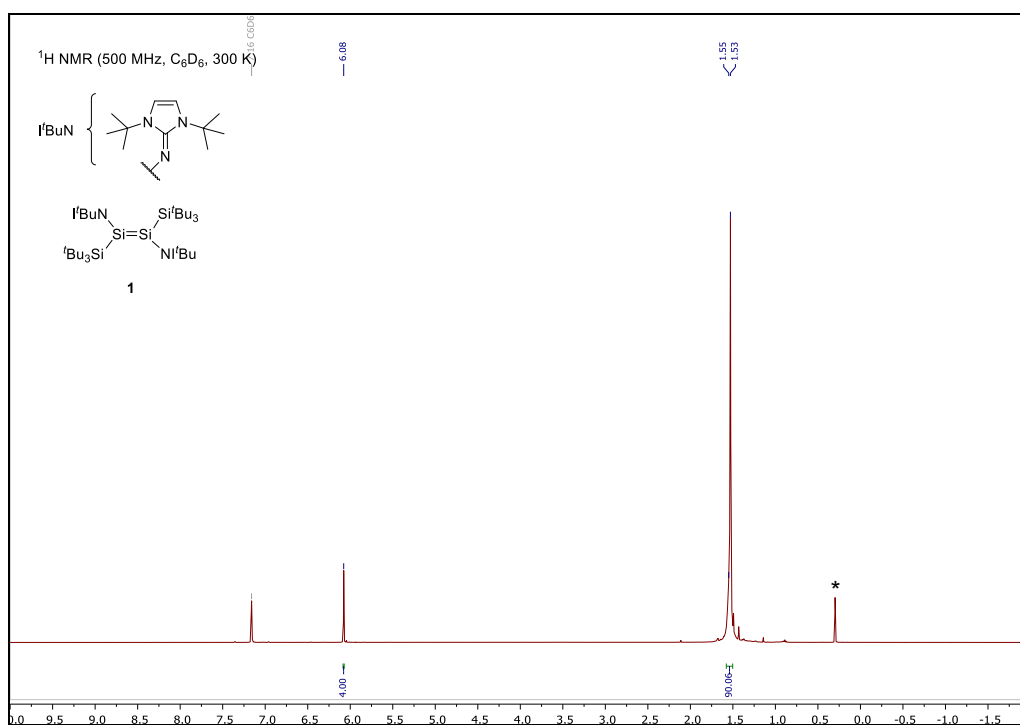

**Figure S1:** <sup>1</sup>H NMR spectrum (500 MHz) of compound **1** in C<sub>6</sub>D<sub>6</sub> at 300 K. Signal labeled with \* belongs to silicone grease.

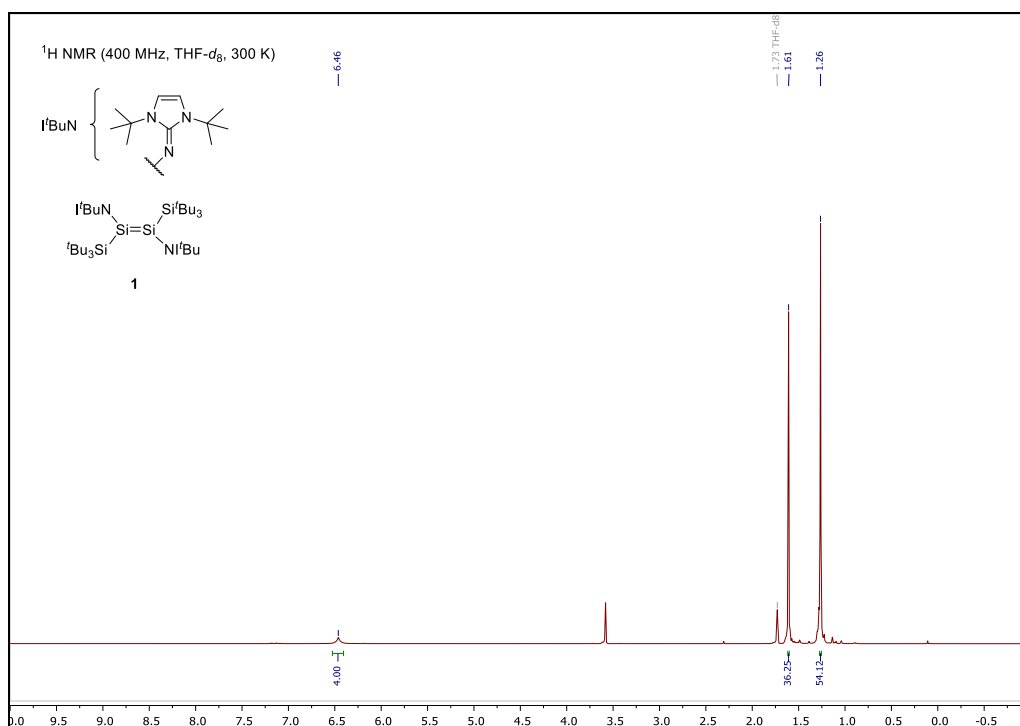

**Figure S2:** <sup>1</sup>H NMR spectrum (400 MHz) of compound **1** in THF-*d*<sub>8</sub> at 300 K.

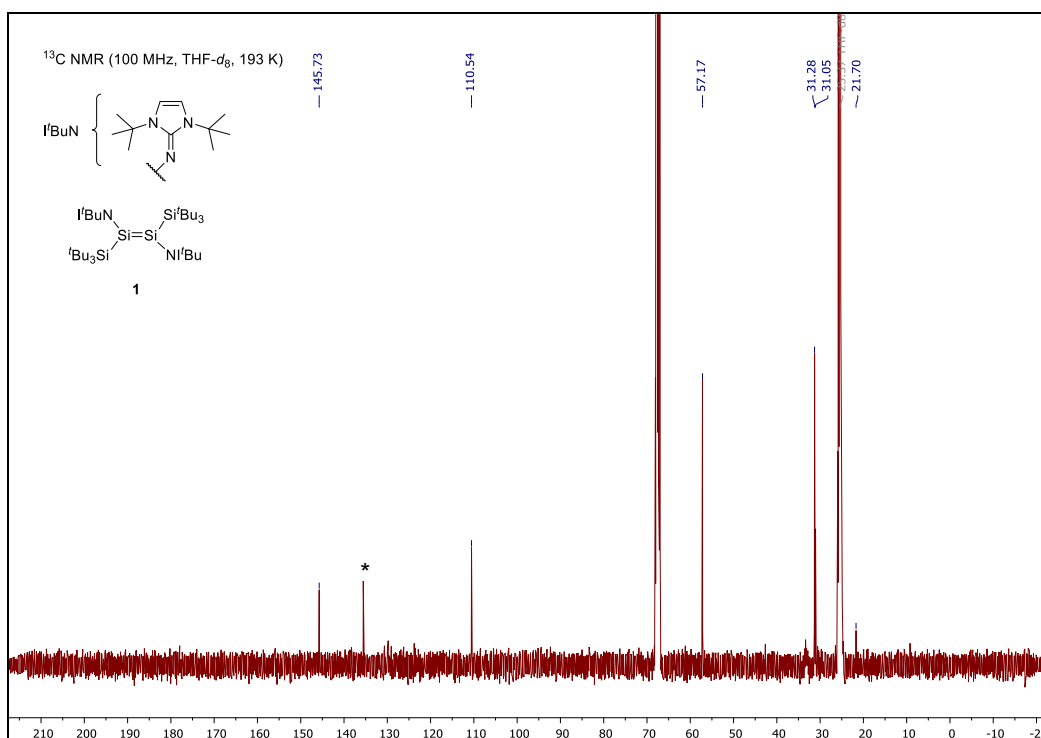

**Figure S3:** <sup>13</sup>C NMR spectrum (100 MHz) of compound **1** in THF-*d*<sub>8</sub> at 193 K. Signal labeled with \* belongs to residual toluene.

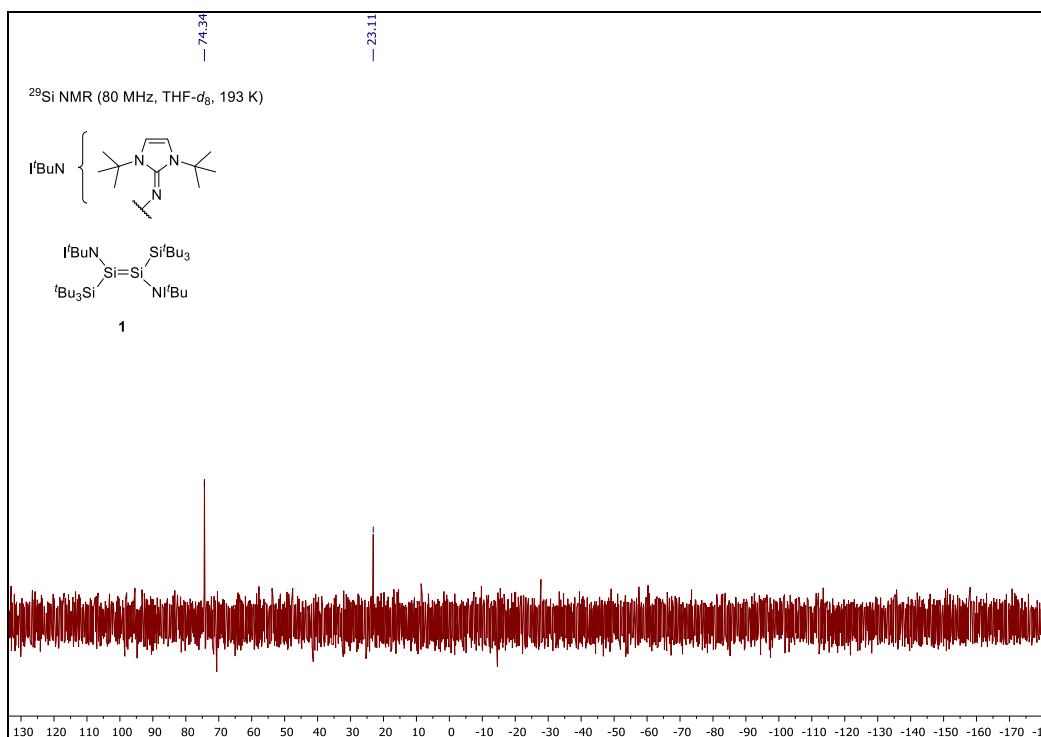

**Figure S4:** <sup>29</sup>Si NMR spectrum (80 MHz) of compound **1** in THF-*d*<sub>8</sub> at 193 K.

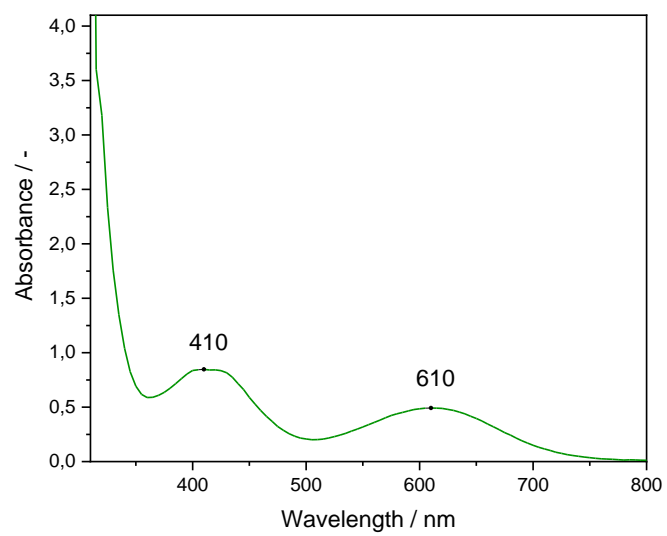

**Figure S5:** UV-vis spectrum of green disilene **1** in *n*-hexane ( $2.5 \times 10^{-3}$  M), measured at room temperature ( $\lambda_{\text{max}} = 410$  nm ( $\epsilon = 339$  L mol $^{-1}$  cm $^{-1}$ ); 610 nm ( $\epsilon = 197$  L mol $^{-1}$  cm $^{-1}$ )).



### 1.3 Iminodisilene $t\text{BuN}(t\text{Bu}_2\text{MeSi})\text{Si}=\text{Si}(\text{Si}^t\text{Bu}_2\text{Me})\text{N}^t\text{Bu}$ (**2**)

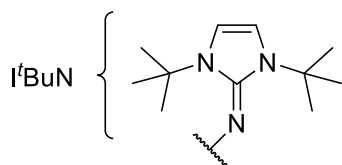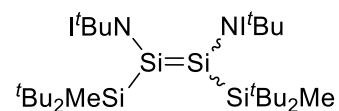

**2**

$\text{Si}_4\text{C}_{40}\text{H}_{82}\text{N}_6$

759.48 g/mol

A solution of  $t\text{Bu}_2\text{MeSiNa}$  (684 mg, 3.79 mmol, 2.15 eq.) in THF (15 mL) was added dropwise to a solution of  $t\text{BuNSiBr}_3$  (815 mg, 1.76 mmol, 1.00 eq.) in THF (20 mL) at room temperature. An immediate color change to deep red was observed. After stirring the mixture for 1 h, the solvent was removed under reduced pressure and the residue extracted with toluene (3 × 4 mL). The solvent was evaporated *in vacuo* and the byproduct  $t\text{Bu}_2\text{MeSiBr}$  was removed by sublimation in high vacuum (70 °C,  $2 \times 10^{-5}$  mbar). Compound **2** was obtained as crystalline deep red solid (550 mg, 724  $\mu\text{mol}$ , 82%) and is stable at ambient and elevated (90 °C) temperatures in solid state and in solution (benzene, toluene, *n*-hexane, THF).

Single crystals suitable for XRD analysis were obtained from cooling a concentrated solution of **2** in *n*-hexane to -35 °C. In solution, temperature-dependent (*E/Z*)-isomerization of **2** with **2-(Z)** as major species can be observed.

**m.p.:** 211 °C (decomposition, color change to brown).

**2-(Z):**

**$^1\text{H}$  NMR (500 MHz,  $\text{C}_6\text{D}_6$ , 300 K):**  $\delta$  [ppm] = 6.04 (s, 4H,  $\text{CH-N}$ ), 1.47 (s, 36H,  $t\text{Bu}_2\text{MeSi}$ ), 1.43 (s, 36H,  $\text{N}^t\text{Bu}$ ), 0.52 (s, 6H,  $t\text{Bu}_2\text{MeSi}$ ).

**$^{13}\text{C}\{^1\text{H}\}$  NMR (126 MHz,  $\text{C}_6\text{D}_6$ , 300 K):**  $\delta$  [ppm] = 144.1 ( $\text{C}=\text{N}$ ), 107.9 ( $\text{CH-N}$ ), 54.9 ( $\text{NC}(\text{CH}_3)_3$ ), 31.2 ( $\text{Si}(\text{C}(\text{CH}_3)_3)_2(\text{CH}_3)$ ), 29.6 ( $\text{NC}(\text{CH}_3)_3$ ), 21.2 ( $\text{Si}(\text{C}(\text{CH}_3)_3)_2(\text{CH}_3)$ ), -3.9 ( $\text{Si}(\text{C}(\text{CH}_3)_3)_2(\text{CH}_3)$ ).

**$^{29}\text{Si}\{^1\text{H}\}$  NMR (99 MHz,  $\text{C}_6\text{D}_6$ , 300 K):**  $\delta$  [ppm] = 67.4 ( $\text{Si}=\text{Si}$ ), 20.4 ( $t\text{Bu}_2\text{MeSi}$ ).

**2-(E):**

**$^1\text{H}$  NMR (500 MHz,  $\text{C}_6\text{D}_6$ , 300 K):**  $\delta$  [ppm] = 6.11 (s, 4H,  $\text{CH-N}$ ), 1.59 (s, 36H,  $t\text{Bu}_2\text{MeSi}$ ), 1.46 (s, 36H,  $\text{N}^t\text{Bu}$ ), 0.18 (s, 6H,  $t\text{Bu}_2\text{MeSi}$ ).

**$^{13}\text{C}\{^1\text{H}\}$  NMR (126 MHz,  $\text{C}_6\text{D}_6$ , 300 K):**  $\delta$  [ppm] = 144.8 ( $\text{C}=\text{N}$ ), 108.6 ( $\text{CH-N}$ ), 55.8 ( $\text{NC}(\text{CH}_3)_3$ ), 31.1 ( $\text{Si}(\text{C}(\text{CH}_3)_3)_2(\text{CH}_3)$ ), 29.9 ( $\text{NC}(\text{CH}_3)_3$ ), 21.9 ( $\text{Si}(\text{C}(\text{CH}_3)_3)_2(\text{CH}_3)$ ), -7.0 ( $\text{Si}(\text{C}(\text{CH}_3)_3)_2(\text{CH}_3)$ ).

**$^{29}\text{Si}\{^1\text{H}\}$  NMR (99 MHz,  $\text{C}_6\text{D}_6$ , 300 K):**  $\delta$  [ppm] = 71.4 ( $\text{Si}=\text{Si}$ ), 7.9 ( $t\text{Bu}_2\text{MeSi}$ ).

Note: As opposed to **1**, the best results were achieved when performing the reaction in THF.

|            |                                                   |                   |                                  |
|------------|---------------------------------------------------|-------------------|----------------------------------|
| <b>EA:</b> | $\text{Si}_4\text{C}_{40}\text{H}_{82}\text{N}_6$ | Calculated [%]:   | C (63.26), H (10.88), N (11.07)  |
|            |                                                   | Experimental [%]: | C (63.08), H (10.97), N (10.79). |

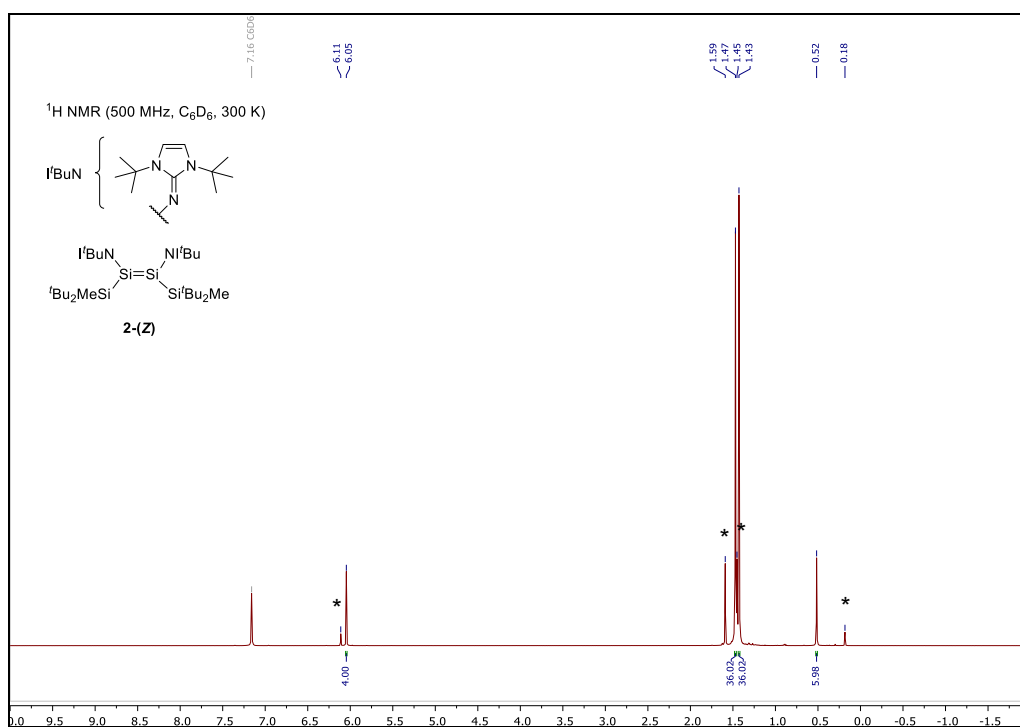

**Figure S6:** <sup>1</sup>H NMR spectrum (500 MHz) of compound **2-(Z)** in C<sub>6</sub>D<sub>6</sub> at 300 K. Signals labeled with \* belong to **2-(E)**.

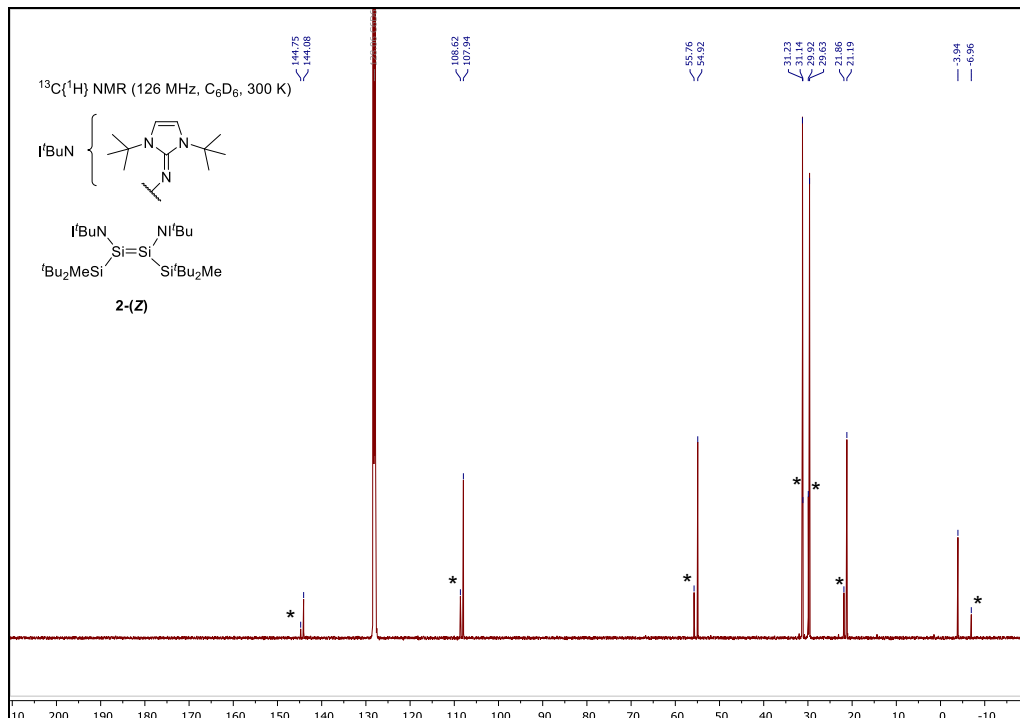

**Figure S7:** <sup>13</sup>C{<sup>1</sup>H} spectrum (126 MHz) of compound **2-(Z)** in C<sub>6</sub>D<sub>6</sub> at 300 K. Signals labeled with \* belong to **2-(E)**.

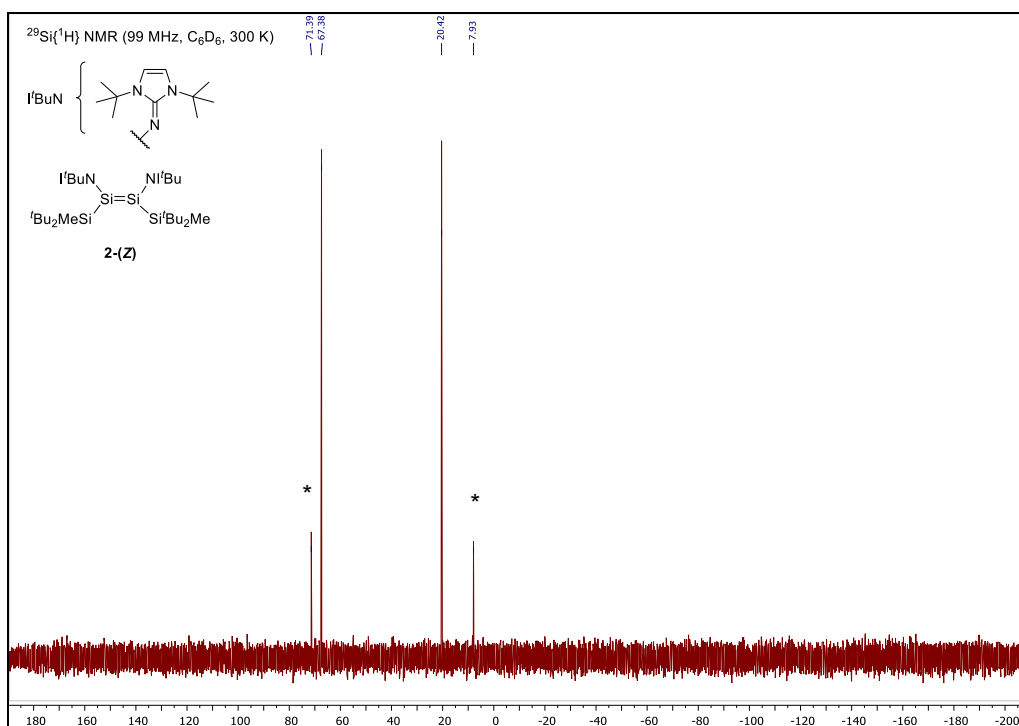

**Figure S8:**  $^{29}\text{Si}\{^1\text{H}\}$  NMR spectrum (99 MHz) of compound **2-(Z)** in  $\text{C}_6\text{D}_6$  at 300 K. Signals labeled with \* belong to **2-(E)**.

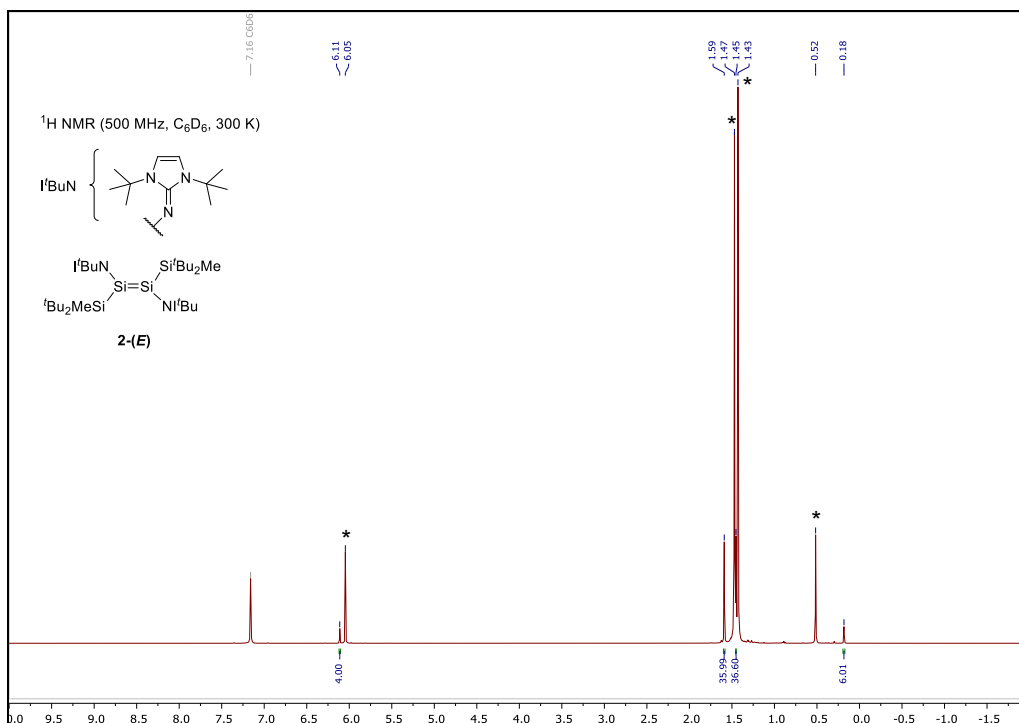

**Figure S9:**  $^1\text{H}$  NMR spectrum (500 MHz) of compound **2-(E)** in  $\text{C}_6\text{D}_6$  at 300 K. Signals labeled with \* belong to **2-(Z)**.

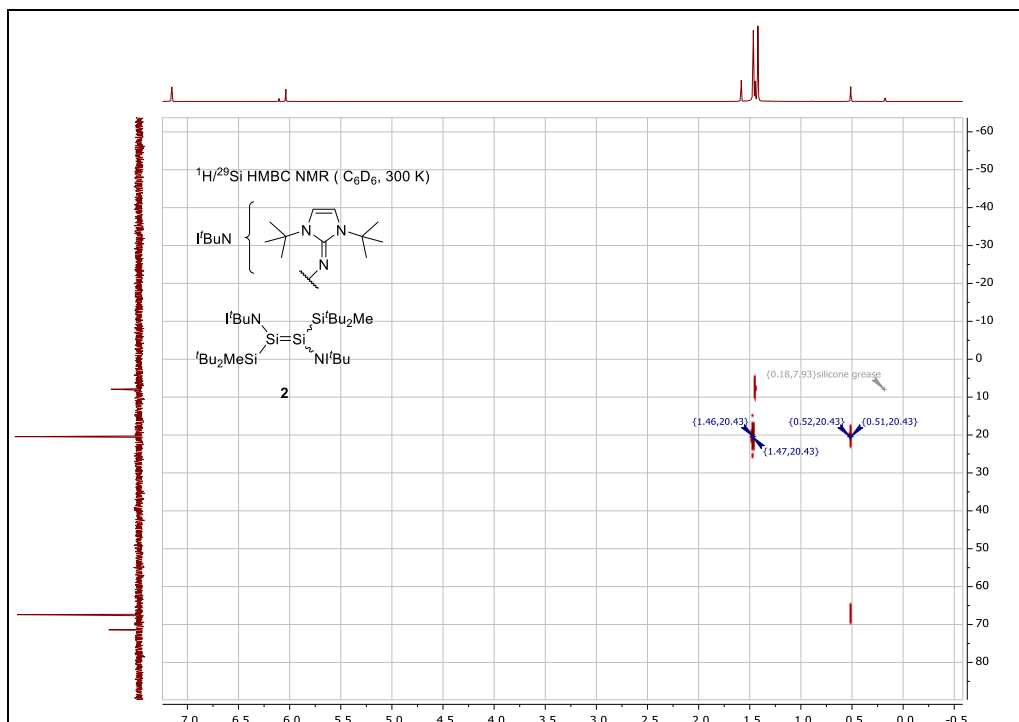

**Figure S10:**  $^1\text{H}/^{29}\text{Si}$  HMBC NMR spectrum of disilene **2** in  $\text{C}_6\text{D}_6$  at 300 K.

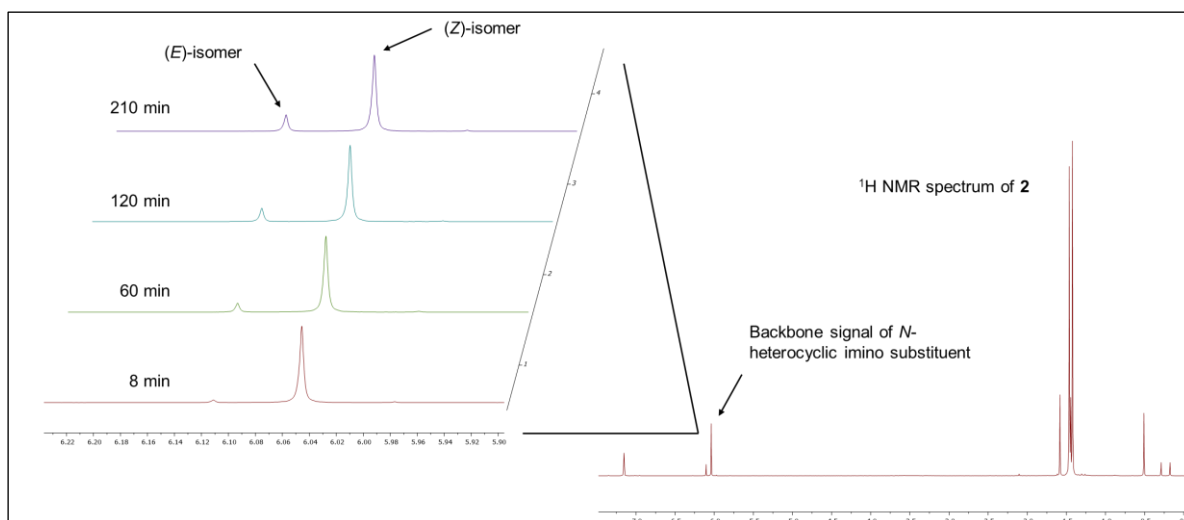

**Figure S11:**  $^1\text{H}$  NMR kinetic studies of (*E/Z*)-isomerization of **2** in solution at room temperature.

Note: Crystals of **2** (5 mg) were dissolved in  $\text{C}_6\text{D}_6$  and the isomerization process was monitored by  $^1\text{H}$  NMR spectroscopy. NMR measurement 8 minutes after dissolving the crystals revealed almost no observable (*E*)-isomer. Hence, we assume that **2** adopts solely (*Z*)-configuration in the solid state. In solution the equilibrium of (*E*) and (*Z*) is reached at room temperature after 3.5 hours with a ratio of (*E*):(*Z*) = 18:82. The concentration of **2**, as well as exposure to visible light have no influence on the kinetic of this isomerization reaction.

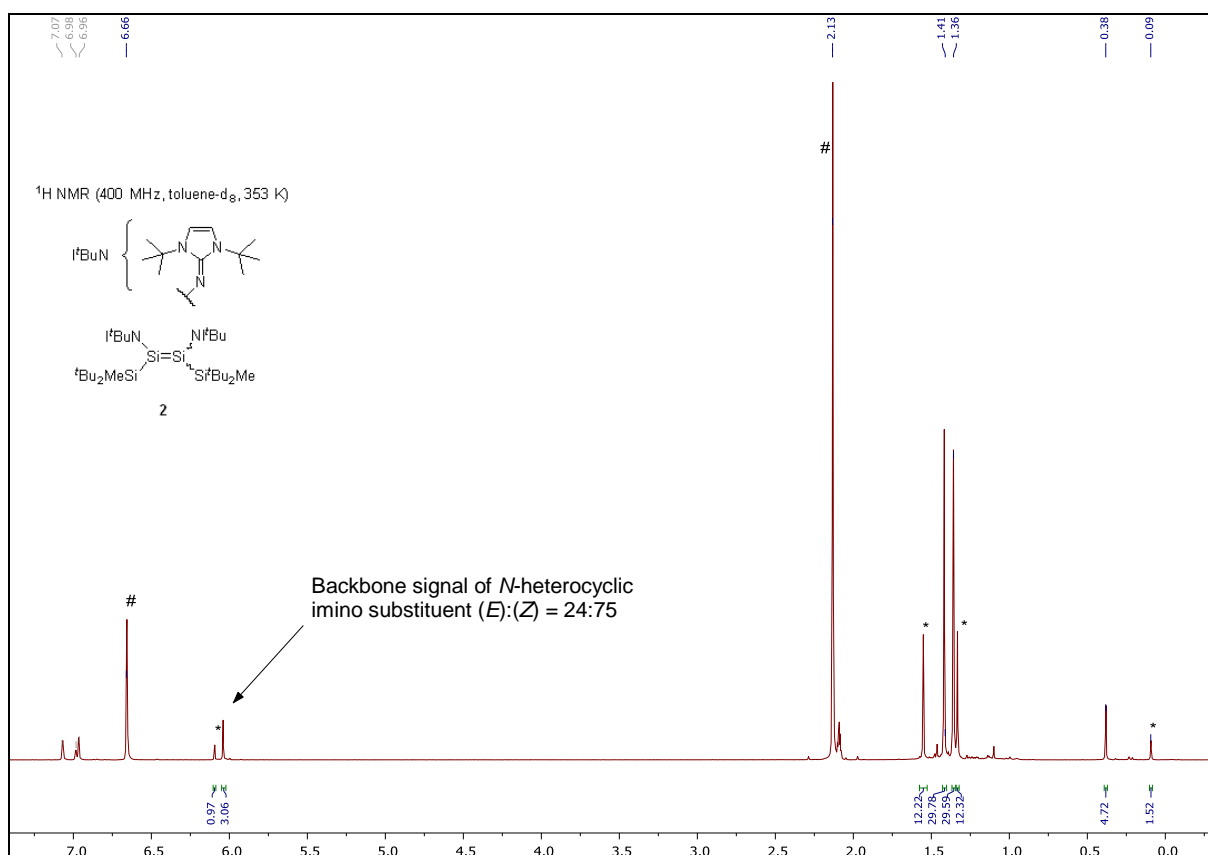

**Figure S12:** <sup>1</sup>H NMR spectrum (400 MHz) of compound **2** in toluene-d<sub>8</sub> at 353 K. Signals labelled with \* belong to **2**-(*E*), signals labelled with # belong to mesitylene (internal standard).

Note: In a teflon-capped NMR tube, crystals of disilene **2** (11.4 mg, 15.01 μmol, 1.0 eq) were dissolved in toluene-d<sub>8</sub> (0.4 mL) and subsequently an internal standard of mesitylene (10 μL, 72.35 μmol, 4.82 eq.) was added. The sample was heated to 80 °C in the NMR spectrometer. After sufficient waiting time to reach the equilibrium between the isomers, the NMR spectrum in Figure S12 was measured at 80 °C. The ratio of **2**-(*E*):**2**-(*Z*) is 24:76.

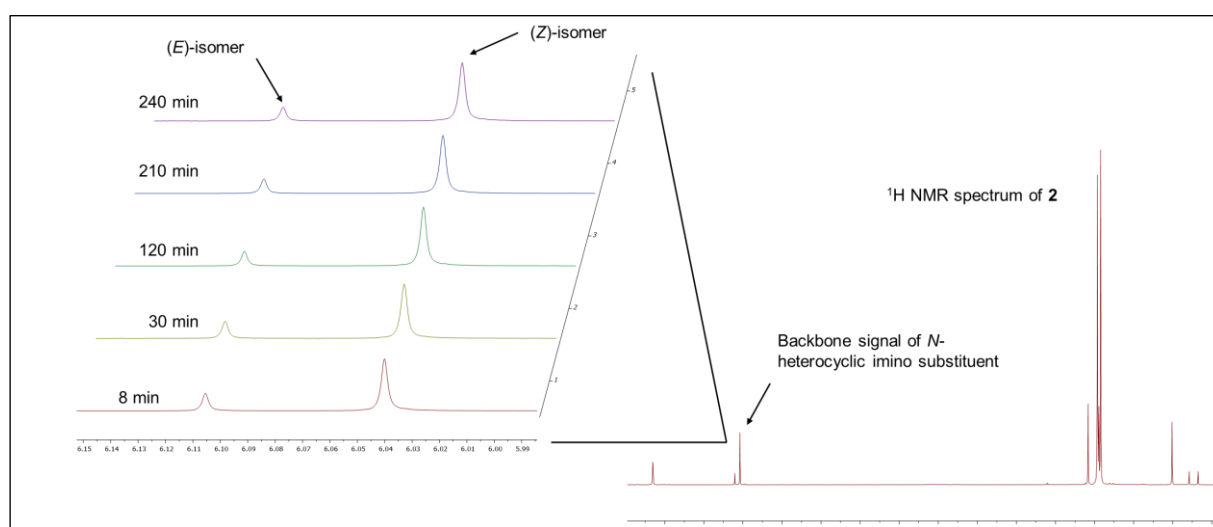

**Figure S13:** <sup>1</sup>H NMR kinetic studies of (*E/Z*)-isomerization of **2** after heating to 80 °C in solution at room temperature.

Note: A solution of **2** in  $C_6D_6$  was heated to  $80\text{ }^\circ C$  for 6 hours. Subsequently, the (*E/Z*)-isomerization process was monitored at room temperature by  $^1H$  NMR spectroscopy. The initially (after 8 min) observed ratio (*E*):(*Z*) = 24:76 changed within 3.5 hours to (*E*):(*Z*) = 18:82, the same value, which was previously observed from isomerization of crystalline **2** at room temperature. This process can be repeated in cycles and is fully reversible. No decomposition products were observed.

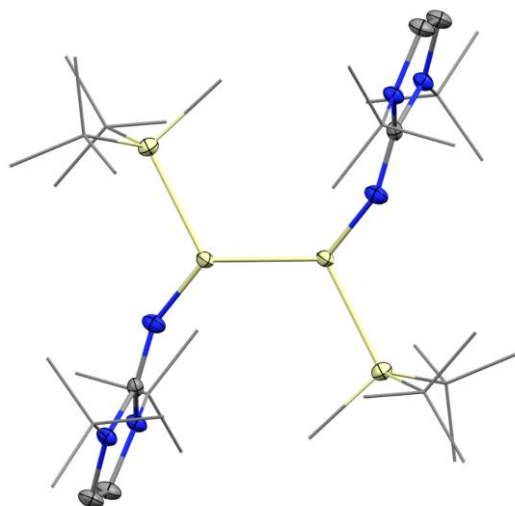

**Figure S14:** Solid state structure of **2-(E)**.

Note: This solid state structure was surprisingly obtained from a reactivity test of **2** and contains a minor, unknown, co-crystallized compound. Therefore, no satisfactory structure was obtained and structural parameters cannot be discussed. Nonetheless, this structure is an unambiguous evidence for the existence of the (*E*)-isomer of **2**.

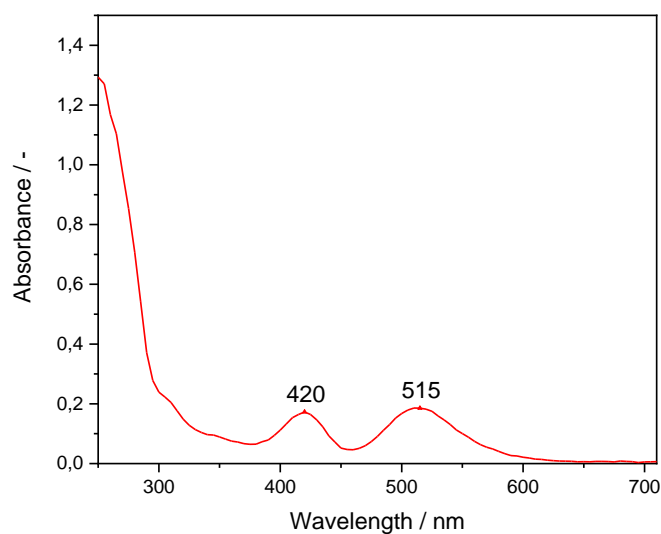

**Figure S15:** UV-vis spectrum of red disilene **2** in *n*-hexane ( $2.5 \times 10^{-3}$  M), measured at room temperature ( $\lambda_{max} = 420$  nm ( $\epsilon = 69$  L mol $^{-1}$  cm $^{-1}$ ); 515 nm ( $\epsilon = 74$  L mol $^{-1}$  cm $^{-1}$ )).

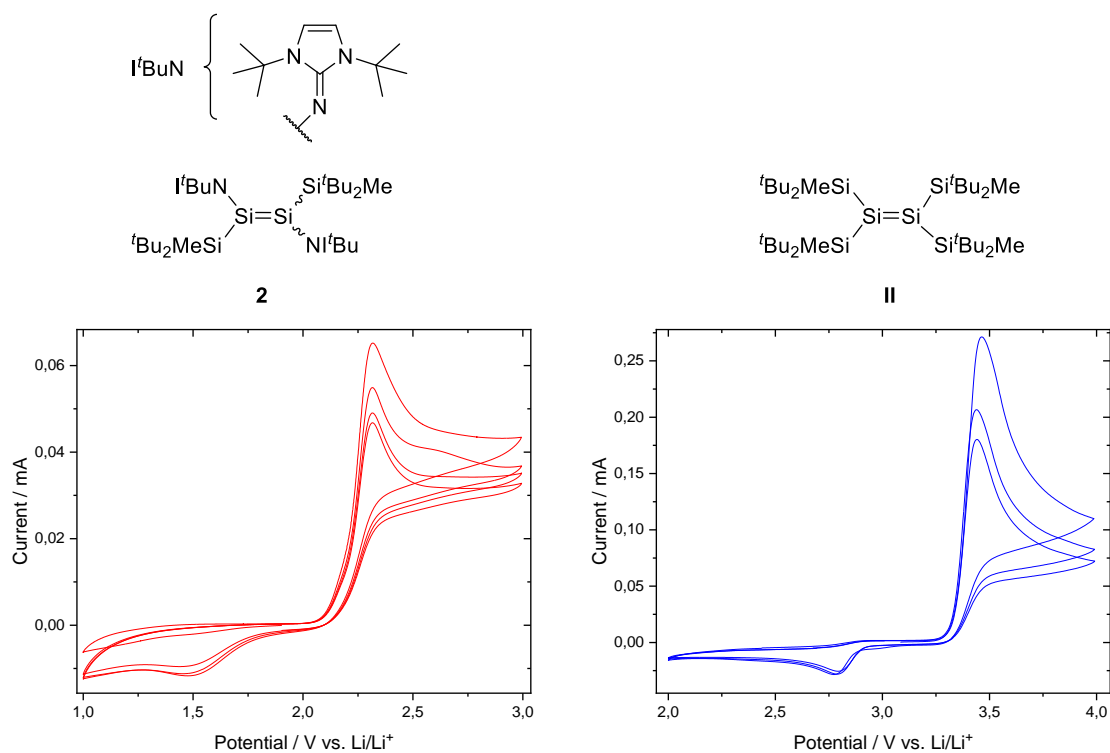

**Figure S16:** Cyclic voltammogram displaying the oxidation waves of **2** (left) and (tBu<sub>2</sub>MeSi)<sub>2</sub>Si=Si(Si<sup>t</sup>Bu<sub>2</sub>Me)<sub>2</sub> (**II**) (right), measured in multiple cycles in a three-electrode setup using a lithium metal reference electrode (0.1 M (*n*-Bu<sub>4</sub>N)TFSI in THF at room temperature).

Note: Since the only disilene radical cation reported so far derives from one-electron oxidation of **II**, we measured the cyclic voltammograms of **II** and iminodisilene **2** under the same conditions for comparison. Apparently, the oxidation of **2** occurs at lower potentials than required for the oxidation of **II** (~1 V vs. Li/Li<sup>+</sup>). This result already indicates the accessibility of a cationic species, from oxidation of **2**.

#### 1.4 $t\text{BuN}(t\text{Bu}_2\text{MeSi})\text{Si-PhCCPh}$ (**3**)

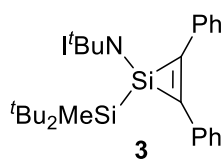

$\text{Si}_2\text{C}_{34}\text{H}_{51}\text{N}_3$

557.36 g/mol

Disilene **2** (23.2 mg, 30.6  $\mu\text{mol}$ , 1.0 eq) was dissolved in  $\text{C}_6\text{D}_6$  and diphenylacetylene (10.9 mg, 61.1  $\mu\text{mol}$ , 2.0 eq) was added. The reaction mixture was heated to 90  $^\circ\text{C}$  for 20 minutes, during which the loss of the red color of **2** yielded a pale-yellow solution. All volatiles were removed under reduced pressure to afford a yellow powder (27.7 mg, 94% yield). Characterization by multinuclear NMR spectroscopy revealed the [2+1]

cycloaddition product as the main product. A slight impurity of residual diphenylacetylene (marked with # in the NMR spectra) and a second byproduct (marked with \* in the NMR spectra) from a not completely pure batch of disilene **2-(Z)** is contained in the NMR spectra. No attempts to separate the residues by crystallization or washing were successful. A saturated solution of the product mixture in toluene was cooled to  $-35\text{ }^\circ\text{C}$  to give pale-yellow crystals of **3** suitable for SC-XRD analysis.

Note: Reaction at lower temperatures (50  $^\circ\text{C}$ ) affords another product besides **3**, which we assume to be the [2+2] cycloaddition product. Unfortunately, we were not able to separate the two compounds to characterize this species unambiguously.

**$^1\text{H}$  NMR (500 MHz,  $\text{C}_6\text{D}_6$ , 300 K):**  $\delta$  [ppm] = 7.78 – 7.75 (m, 4H, Ar-H), 7.23 (t,  $J = 7.7$  Hz, 4H, Ar-H), 7.08 – 7.03 (m, 2H, Ar-H), 5.98 (s, 2H, CH-N), 1.41 (s, 18H, tBuN), 1.34 (s, 18H, tBu<sub>2</sub>MeSi), 0.42 (s, 6H, tBu<sub>2</sub>MeSi).

**$^{13}\text{C}\{^1\text{H}\}$  NMR (126 MHz,  $\text{C}_6\text{D}_6$ , 300 K):**  $\delta$  [ppm] = 166.8 (SiC<sub>2</sub>), 138.2 (C=N), 128.5 (m-C<sub>Ar</sub>), 128.1 (p-C<sub>Ar</sub>), 126.6 (o-C<sub>Ar</sub>), 123.7 (quart-C<sub>Ar</sub>), 107.5 (CH-N), 55.0 (NC(CH<sub>3</sub>)<sub>3</sub>), 30.0 (Si(C(CH<sub>3</sub>)<sub>3</sub>)<sub>2</sub>(CH<sub>3</sub>)), 28.9 (NC(CH<sub>3</sub>)<sub>3</sub>), 20.7 (Si(C(CH<sub>3</sub>)<sub>3</sub>)<sub>2</sub>(CH<sub>3</sub>)),  $-6.2$  (Si(C(CH<sub>3</sub>)<sub>3</sub>)<sub>2</sub>(CH<sub>3</sub>)).

**$^{29}\text{Si}\{^1\text{H}\}$  NMR (99 MHz,  $\text{C}_6\text{D}_6$ , 195 K):**  $\delta$  [ppm] = 2.7 (Si<sup>t</sup>Bu<sub>2</sub>Me),  $-122.4$  (NSi<sup>t</sup>Bu<sub>2</sub>Me).

|                  |                                                   |                   |               |
|------------------|---------------------------------------------------|-------------------|---------------|
| <b>LIFDI-MS:</b> | $\text{C}_{34}\text{H}_{51}\text{N}_3\text{Si}_2$ | Calculated [%]:   | 557.3616 m/z  |
|                  |                                                   | Experimental [%]: | 557.3607 m/z. |

Note: To prove the proposed mechanism of the (*Z/E*)-isomerization of **2** via the monomeric silylenes, we also tested the conversion of **2** with  $\text{B}(\text{C}_6\text{F}_5)_3$ , as the adduct with the monomer of **VI** was reported previously.<sup>58</sup> In the reaction with BCF we obtained a green or red oily compound, depending on choice of solvent and temperature, which we were unfortunately not able to characterize.



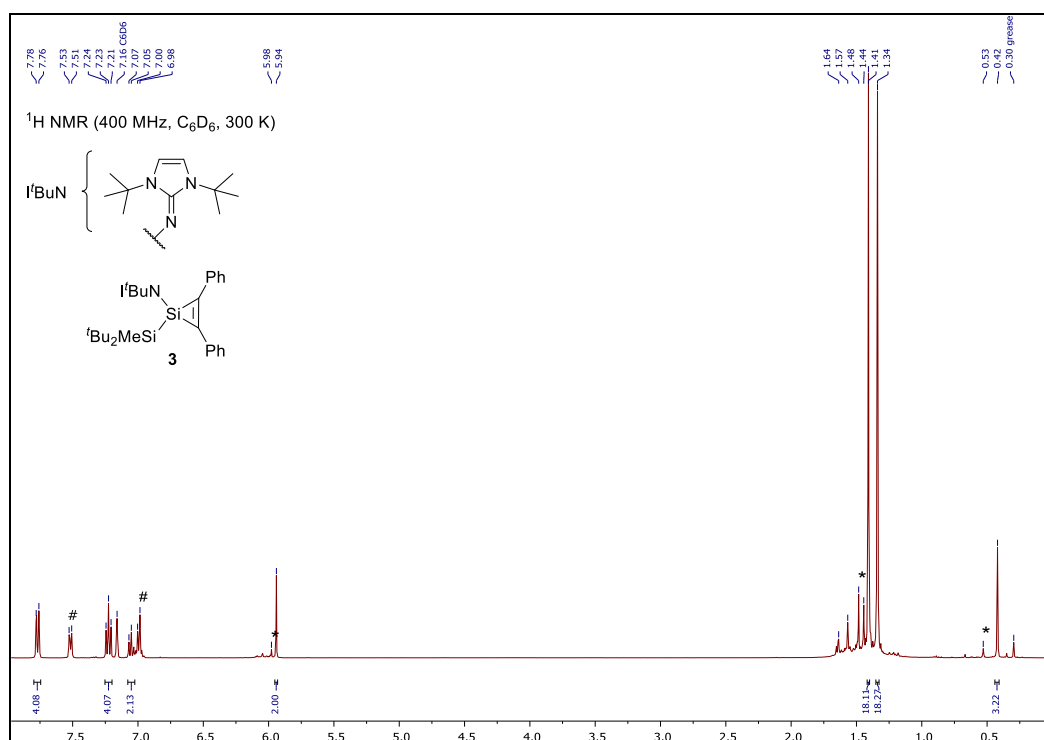

**Figure S17:** <sup>1</sup>H NMR spectrum (500 MHz) of compound **3** in C<sub>6</sub>D<sub>6</sub> at 300 K. Signals labeled with \* belong to the byproduct and signals labelled with # belong to excess diphenylacetylene.

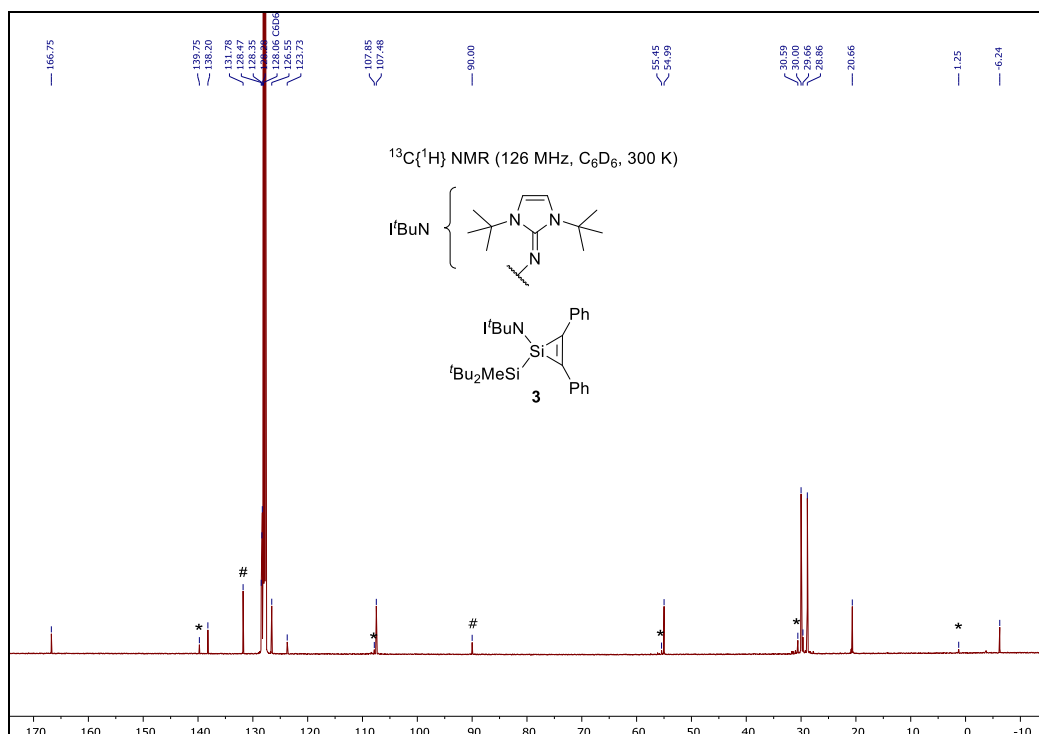

**Figure S18:** <sup>13</sup>C{<sup>1</sup>H} spectrum (126 MHz) of compound **3** in C<sub>6</sub>D<sub>6</sub> at 300 K. Signals labeled with \* belong to the byproduct and signals labelled with # belong to excess diphenylacetylene. The signals corresponding to the phenyl C atoms of excess diphenylacetylene are not observable due to overlaying signals with the solvent C<sub>6</sub>D<sub>6</sub>.

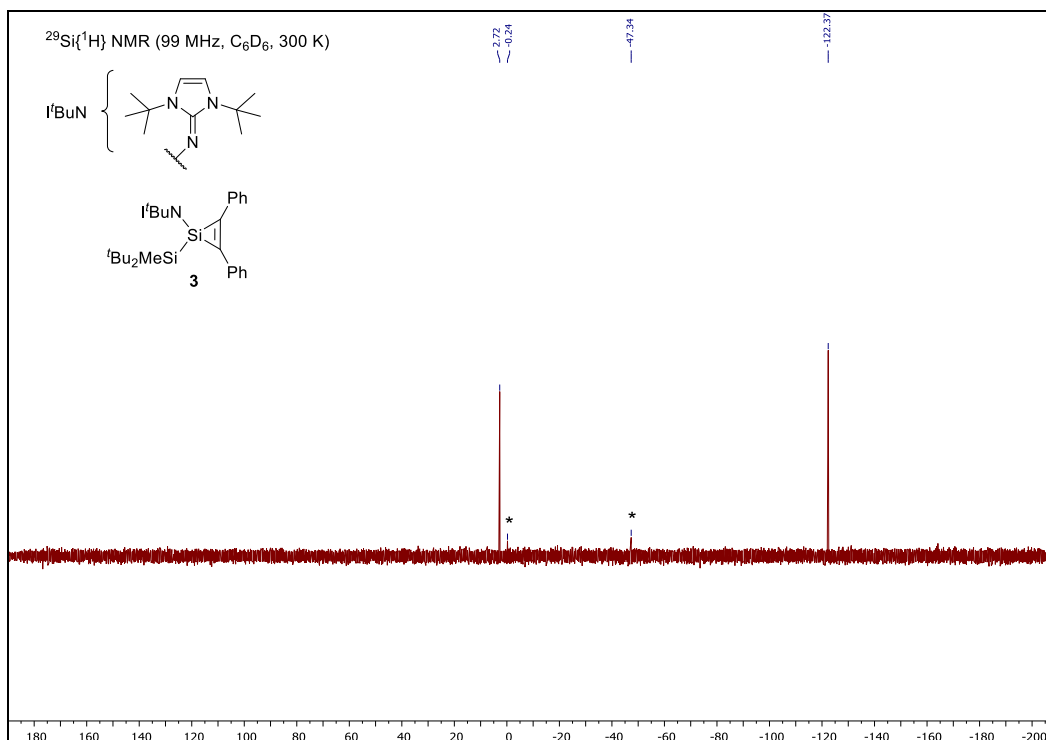

**Figure S19:**  $^{29}\text{Si}\{^1\text{H}\}$  spectrum (99 MHz) of compound **3** in  $\text{C}_6\text{D}_6$  at 300 K. Signals labeled with \* belong to the byproduct.

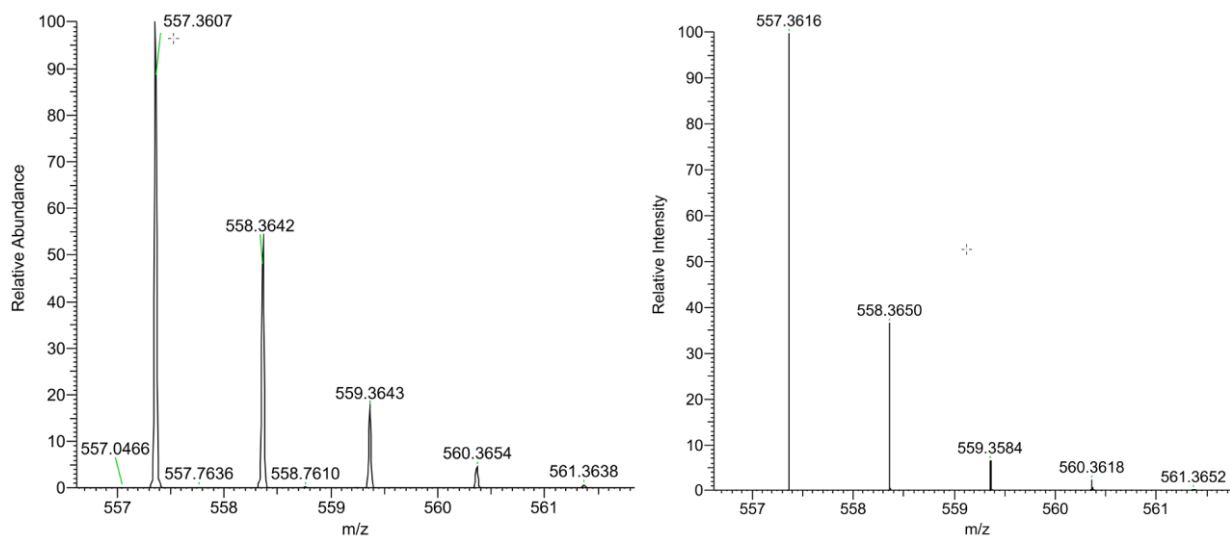

**Figure S20:** LIFDI-MS spectrometry (detail view with isotope pattern) of **3**. Measured (left,  $m/z = 557.3607$ ) and simulated (right,  $m/z = 557.3616$ ) mass spectrum.

### 1.5 $t\text{BuN}(t\text{Bu}_2\text{MeSi})\text{HSi-SiH}(\text{Si}^t\text{Bu}_2\text{Me})\text{N}^t\text{Bu}$ (**4**)

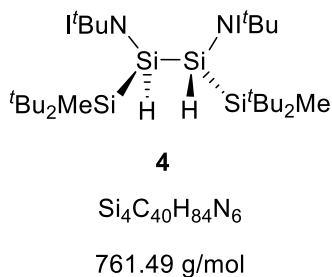

A toluene (8 mL) solution of disilene **1** (60.0 mg, 79.0  $\mu\text{mol}$ , 1.00 eq.) in a pressurizable Schlenk flask was degassed (freeze-pump-thaw) and subsequently exposed to hydrogen gas (1 bar) at room temperature. Complete decolorization occurred within 2 hours. After concentrating the solution under reduced pressure, silane **4** was obtained by crystallization at  $-35\text{ }^\circ\text{C}$  as colorless crystals (47.6 mg, 62.5  $\mu\text{mol}$ , 79% yield). These crystals

were also suitable for SC-XRD analysis.

**m.p.:** 195  $^\circ\text{C}$  (decomposition).

**$^1\text{H}$  NMR (500 MHz,  $\text{C}_6\text{D}_6$ , 300 K):**  $\delta$  [ppm] = 6.53 (s, 2H,  $\text{SiH}$ ), 6.05 (d, 2H,  $^3J = 3.3\text{ Hz}$ ,  $\text{CH-N}$ ), 6.03 (d, 2H,  $^3J = 3.3\text{ Hz}$ ,  $\text{CH-N}$ ), 1.49 (s, 18H,  $t\text{BuN}$ ), 1.45 (s, 18H,  $t\text{Bu}_2\text{MeSi}$ ), 1.37 (s, 18H,  $t\text{Bu}_2\text{MeSi}$ ), 1.36 (s, 18H,  $t\text{BuN}$ ), 0.42 (s, 6H,  $t\text{Bu}_2\text{MeSi}$ ).

**$^{13}\text{C}\{^1\text{H}\}$  NMR (126 MHz,  $\text{C}_6\text{D}_6$ , 300 K):**  $\delta$  [ppm] = 141.7 ( $\text{C=N}$ ), 107.5 ( $\text{CH-N}$ ), 107.2 ( $\text{CH-N}$ ), 55.0 ( $\text{NC}(\text{CH}_3)_3$ ), 54.4 ( $\text{NC}(\text{CH}_3)_3$ ), 31.0 ( $\text{Si}(\text{C}(\text{CH}_3)_3)_2(\text{CH}_3)$ ), 30.1 ( $\text{Si}(\text{C}(\text{CH}_3)_3)_2(\text{CH}_3)$ ), 29.9 ( $\text{NC}(\text{CH}_3)_3$ ), 29.5 ( $\text{NC}(\text{CH}_3)_3$ ), 21.6 ( $\text{Si}(\text{C}(\text{CH}_3)_3)_2(\text{CH}_3)$ ), 21.5 ( $\text{Si}(\text{C}(\text{CH}_3)_3)_2(\text{CH}_3)$ ),  $-4.8$  ( $\text{Si}(\text{C}(\text{CH}_3)_3)_2(\text{CH}_3)$ ).

**$^{29}\text{Si}\{^1\text{H}\}$  NMR (99 MHz,  $\text{C}_6\text{D}_6$ , 195 K):**  $\delta$  [ppm] = 6.1 ( $t\text{Bu}_2\text{MeSi}$ ),  $-69.1$  ( $\text{SiH}$ ).

|            |                                                   |                   |                                  |
|------------|---------------------------------------------------|-------------------|----------------------------------|
| <b>EA:</b> | $\text{Si}_4\text{C}_{40}\text{H}_{82}\text{N}_6$ | Calculated [%]:   | C (63.09), H (11.12), N (11.04)  |
|            |                                                   | Experimental [%]: | C (62.69), H (11.22), N (10.62). |

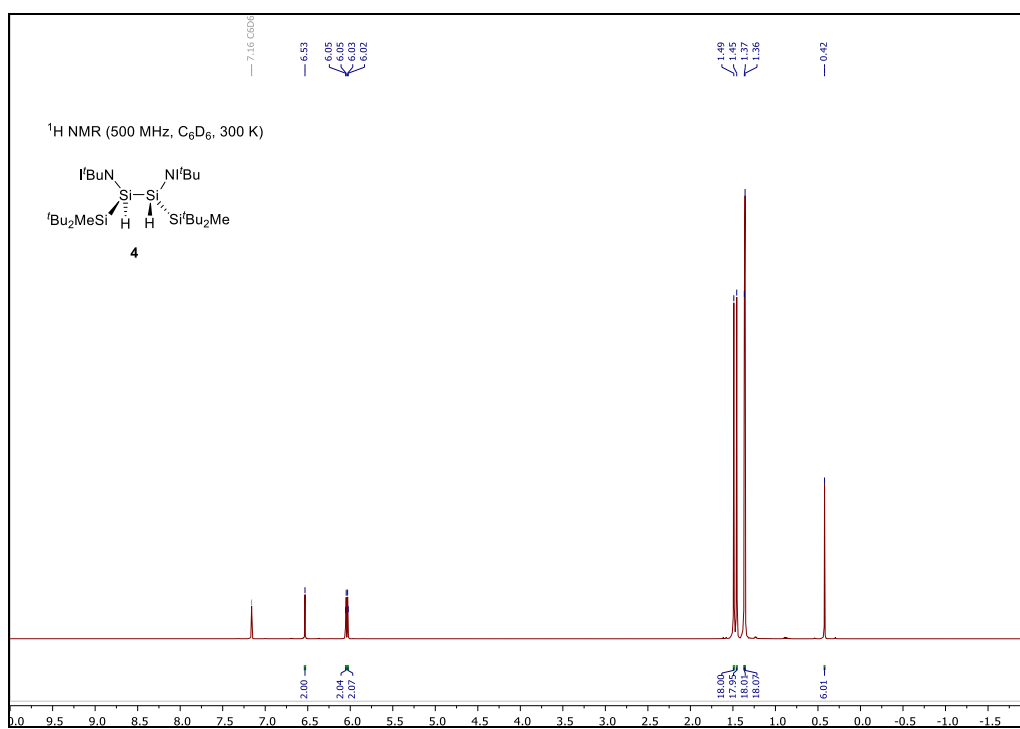

**Figure S21:** <sup>1</sup>H NMR spectrum (500 MHz) of compound **4** in C<sub>6</sub>D<sub>6</sub> at 300 K.

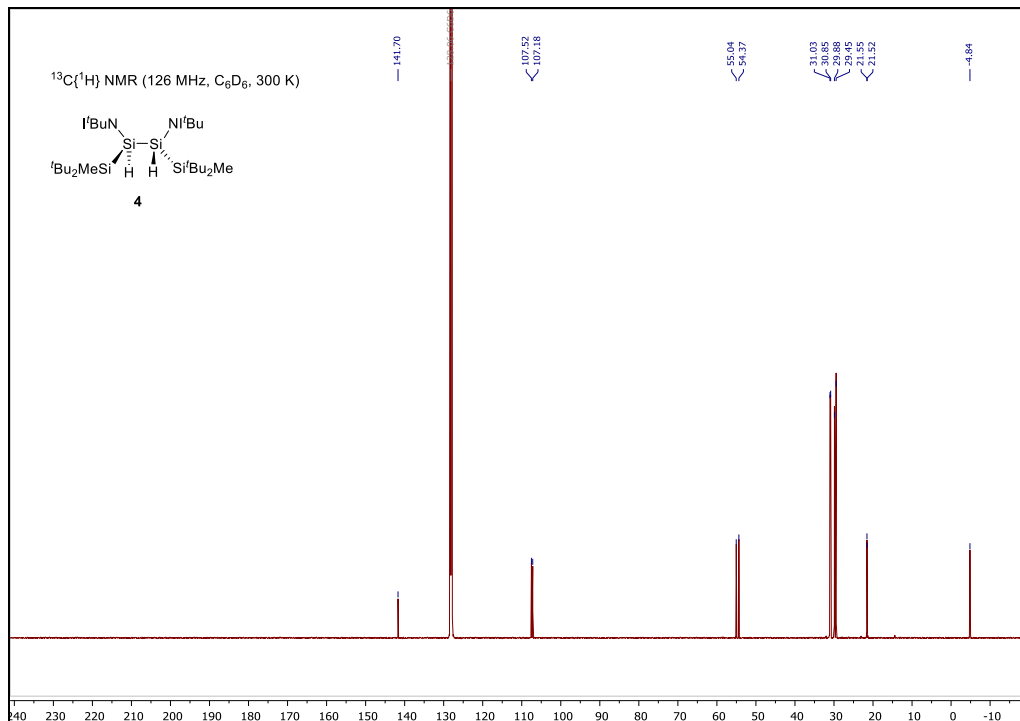

**Figure S22:** <sup>13</sup>C{<sup>1</sup>H} NMR spectrum (126 MHz) of compound **4** in C<sub>6</sub>D<sub>6</sub> at 300 K.

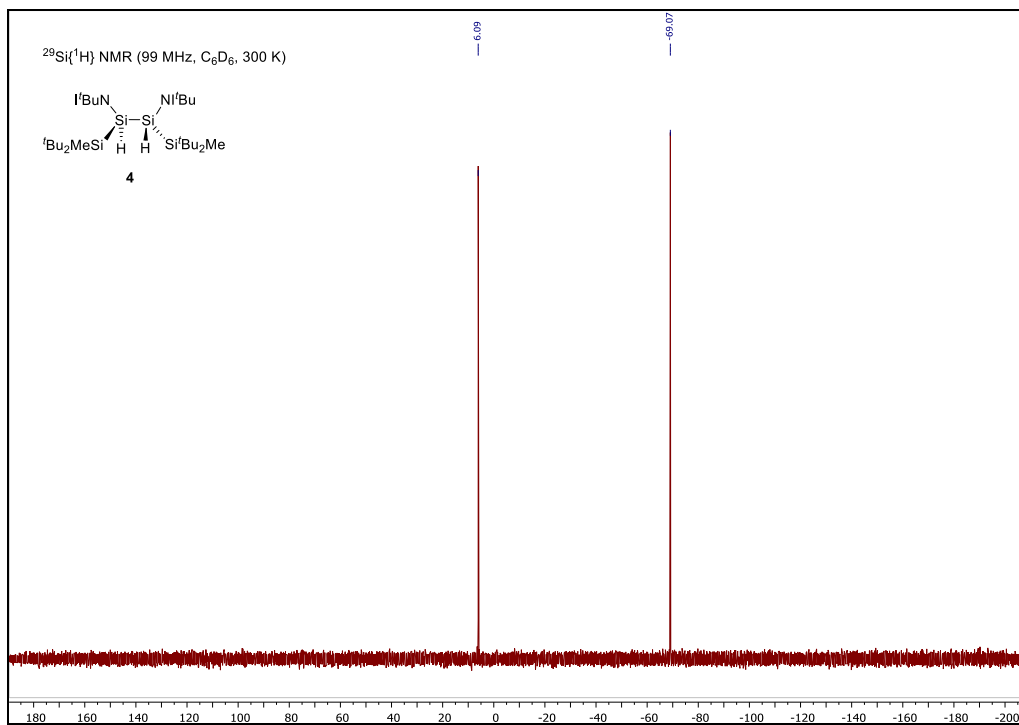

**Figure S23:**  $^{29}\text{Si}\{^1\text{H}\}$  NMR spectrum (99 MHz) of compound **4** in  $\text{C}_6\text{D}_6$  at 300 K.

## 1.6. Dioxadisiletane 5

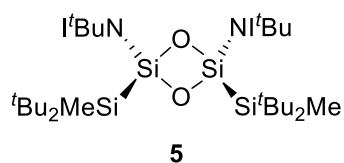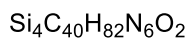

791.48 g/mol

In a pressurizeable Schlenk flask, a solution of disilene **2** (70.0 mg, 92.2  $\mu\text{mol}$ ) in *n*-pentane (10 mL) was cooled to  $-130\text{ }^\circ\text{C}$  and exposed to oxygen (1.2 bar) under stirring. The deep red color rapidly vanished and the solution was allowed to warm to room temperature. After evaporation of all volatiles *in vacuo*, compound **5** was obtained from recrystallization of the residue in *n*-hexane at  $-35\text{ }^\circ\text{C}$  as colorless crystals (61.4 mg, 76.3  $\mu\text{mol}$ ,

83%).

**m.p.:** 266  $^\circ\text{C}$

**$^1\text{H}$  NMR (500 MHz,  $\text{C}_6\text{D}_6$ , 300 K):**  $\delta$  [ppm] = 5.98 (s, 4H,  $\text{CH-N}$ ), 1.48 (s, 36H,  $\text{N}^t\text{Bu}$ ), 1.44 (s, 36H,  $^t\text{Bu}_2\text{MeSi}$ ), 0.53 (s, 6H,  $^t\text{Bu}_2\text{MeSi}$ ).

**$^{13}\text{C}\{^1\text{H}\}$  NMR (126 MHz,  $\text{C}_6\text{D}_6$ , 300 K):**  $\delta$  [ppm] = 140.1 ( $\text{C}=\text{N}$ ), 108.0 ( $\text{CH-N}$ ), 55.7 ( $\text{NC}(\text{CH}_3)_3$ ), 30.8 ( $\text{Si}(\text{C}(\text{CH}_3)_3)_2(\text{CH}_3)$ ), 29.9 ( $\text{NC}(\text{CH}_3)_3$ ), 21.1 ( $\text{Si}(\text{C}(\text{CH}_3)_3)_2(\text{CH}_3)$ ),  $-3.6$  ( $\text{Si}(\text{C}(\text{CH}_3)_3)_2(\text{CH}_3)$ ).

**$^{29}\text{Si}\{^1\text{H}\}$  NMR (99 MHz,  $\text{C}_6\text{D}_6$ , 195 K):**  $\delta$  [ppm] =  $-0.2$  ( $^t\text{Bu}_2\text{MeSi}$ ),  $-47.3$  ( $\text{SiO}$ ).

**EA:**  $\text{Si}_4\text{C}_{40}\text{H}_{82}\text{Br}_2\text{N}_6$

Calculated [%]: C (60.70), H (10.44), N (10.62)

Experimental [%]: C (59.66), H (10.44), N (10.18).

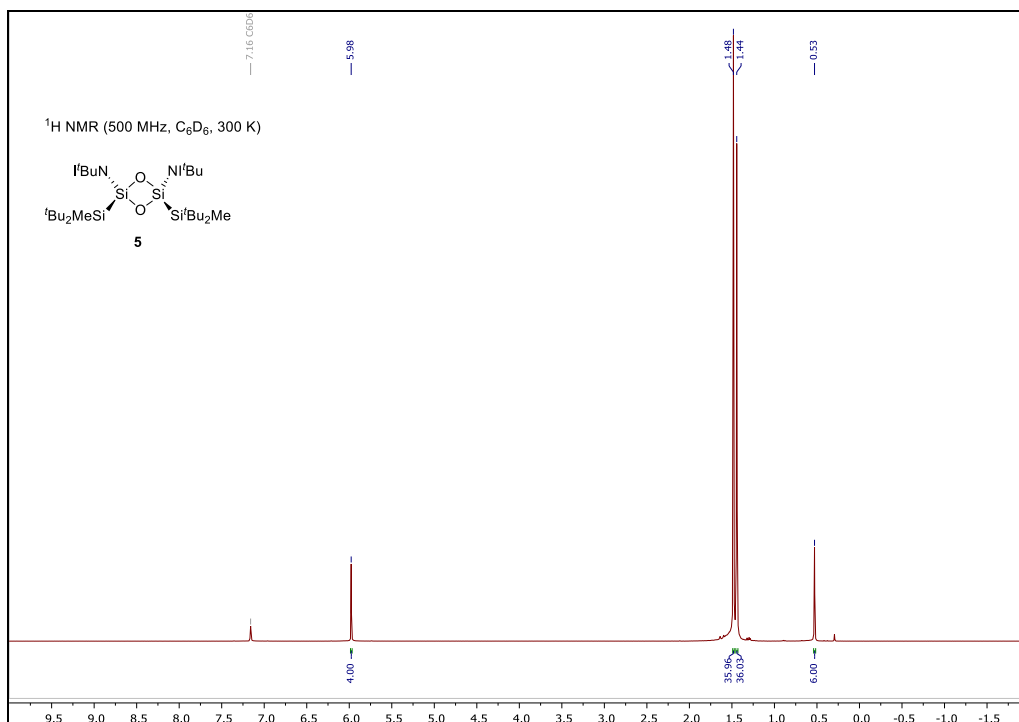

**Figure S24:** <sup>1</sup>H NMR spectrum (500 MHz) of compound **5** in C<sub>6</sub>D<sub>6</sub> at 300 K.

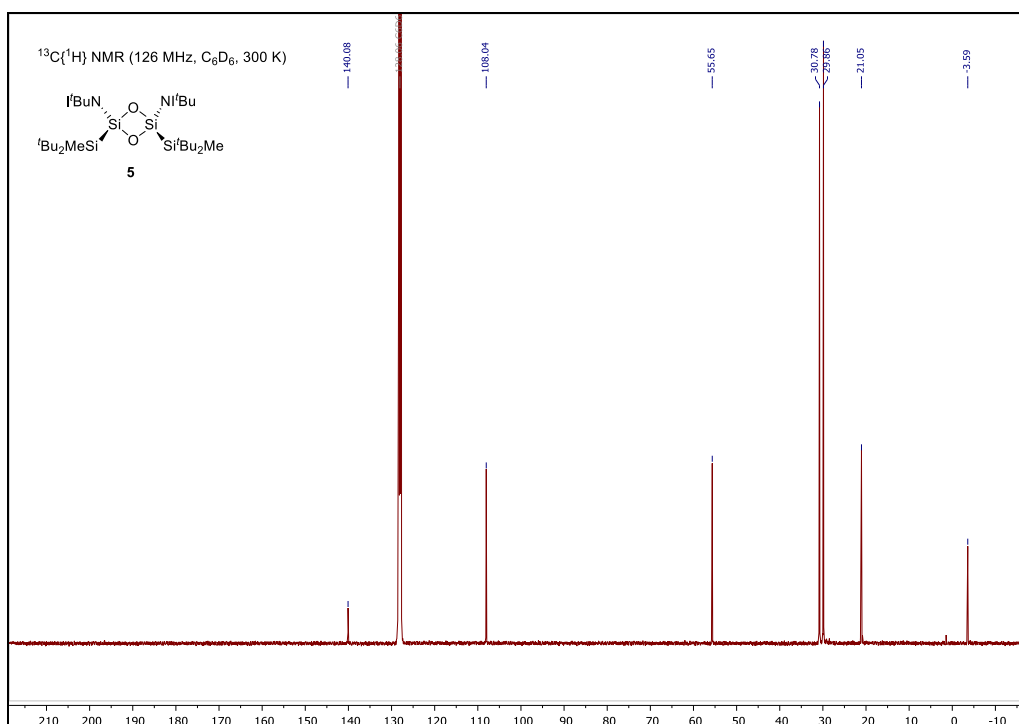

**Figure S25:** <sup>13</sup>C NMR spectrum (126 MHz) of compound **5** in C<sub>6</sub>D<sub>6</sub> at 300 K.

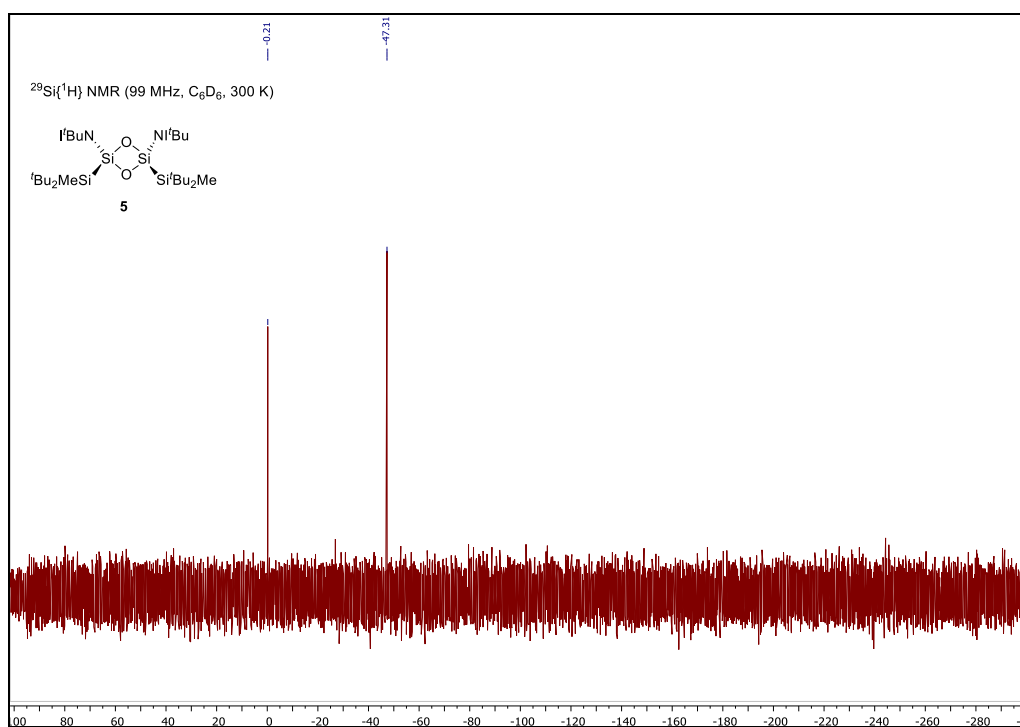

**Figure S26:**  $^{29}\text{Si}$  NMR spectrum (99 MHz) of compound **5** in  $\text{C}_6\text{D}_6$  at 300 K.



### 1.7. Disilaoxirane **6-t/c**

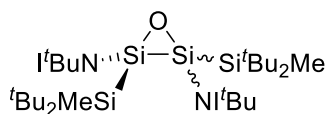

**6-t/c**

Si<sub>4</sub>C<sub>40</sub>H<sub>82</sub>N<sub>6</sub>O

775.48 g/mol

An *n*-pentane (8 mL) solution of **2** (70.0 mg, 92.2 μmol) in a pressurizeable Schlenk flask was cooled to -78 °C and exposed to N<sub>2</sub>O (1 bar) under stirring. The red solution turned yellow and was allowed to warm to ambient temperature after 20 minutes. All volatiles were removed under reduced pressure and the yellow solid residue was purified by recrystallization from *n*-hexane to give yellow crystals (57.3 mg). Multinuclear NMR spectroscopy revealed the composition of this crystals to be 25% **5** and 75% **6-c** (77% yield). Various separation attempts were unsuccessful. Heating of a sample of **6-c** in C<sub>6</sub>D<sub>6</sub> to 70 °C for 16 hours lead to quantitative isomerization to **6-t**, in agreement with the corresponding *trans*-product of **VI**.

Note: Neither the crystals of **6-c**, nor that of **6-t** were suitable for SC-XRD analysis due to co-crystallization with compound **5**. Compounds **6** were identified by comparison of multinuclear NMR spectroscopic data with literature reported disilaoxiranes.<sup>58</sup> Different to **VI**, selective conversion of **2** with CO<sub>2</sub> could not be obtained even at low temperatures (-80 °C). Although dioxadisiletane **5** was observed as the main product, at least two additional species occurred. Despite all efforts (variation of solvents and temperatures), these compounds could not be isolated and identified, but they presumably are the cycloaddition products of CO<sub>2</sub> with the Si=Si double bond akin to the reaction of **VI** with carbon dioxide.<sup>58</sup>

#### **6-c:**

**<sup>1</sup>H NMR (500 MHz, C<sub>6</sub>D<sub>6</sub>, 300 K):** δ [ppm] = 6.02 (d, <sup>3</sup>J = 3.2 Hz, 2H, CH-N), 6.00 (d, <sup>3</sup>J = 3.2 Hz, 2H, CH-N), 1.48 (s, 18H, N<sup>t</sup>Bu), 1.47 (s, 18H, N<sup>t</sup>Bu), 1.43 (s, 18H, <sup>t</sup>Bu<sub>2</sub>MeSi), 1.41 (s, 18H, <sup>t</sup>Bu<sub>2</sub>MeSi), 0.50 (s, 6H, <sup>t</sup>Bu<sub>2</sub>MeSi).

#### **6-t**

**<sup>1</sup>H NMR (500 MHz, C<sub>6</sub>D<sub>6</sub>, 300 K):** δ [ppm] = 6.08 (d, <sup>3</sup>J = 3.2 Hz, 2H, CH-N), 6.06j (d, <sup>3</sup>J = 3.2 Hz, 2H, CH-N), 1.48 (s, 18H, N<sup>t</sup>Bu), 1.47 (s, 18H, N<sup>t</sup>Bu), 1.43 (s, 18H, <sup>t</sup>Bu<sub>2</sub>MeSi), 1.41 (s, 18H, <sup>t</sup>Bu<sub>2</sub>MeSi), 0.50 (s, 6H, <sup>t</sup>Bu<sub>2</sub>MeSi).

**<sup>13</sup>C{<sup>1</sup>H} NMR (126 MHz, C<sub>6</sub>D<sub>6</sub>, 300 K):** δ [ppm] = 143.1 (C=N), 108.4 (CH-N), 108.3 (CH-N), 55.9 (NC(CH<sub>3</sub>)<sub>3</sub>), 55.3 (NC(CH<sub>3</sub>)<sub>3</sub>), 30.9 (Si(C(CH<sub>3</sub>)<sub>3</sub>)<sub>2</sub>(CH<sub>3</sub>)), 30.7 (Si(C(CH<sub>3</sub>)<sub>3</sub>)<sub>2</sub>(CH<sub>3</sub>)), 29.5 (NC(CH<sub>3</sub>)<sub>3</sub>), 22.1 (Si(C(CH<sub>3</sub>)<sub>3</sub>)<sub>2</sub>(CH<sub>3</sub>)), 21.9 (Si(C(CH<sub>3</sub>)<sub>3</sub>)<sub>2</sub>(CH<sub>3</sub>)), -6.4 (Si(C(CH<sub>3</sub>)<sub>3</sub>)<sub>2</sub>(CH<sub>3</sub>)).

**<sup>29</sup>Si{<sup>1</sup>H} NMR (99 MHz, C<sub>6</sub>D<sub>6</sub>, 195 K):** δ [ppm] = 5.3 (<sup>t</sup>Bu<sub>2</sub>MeSi), -48.8 (SiO).

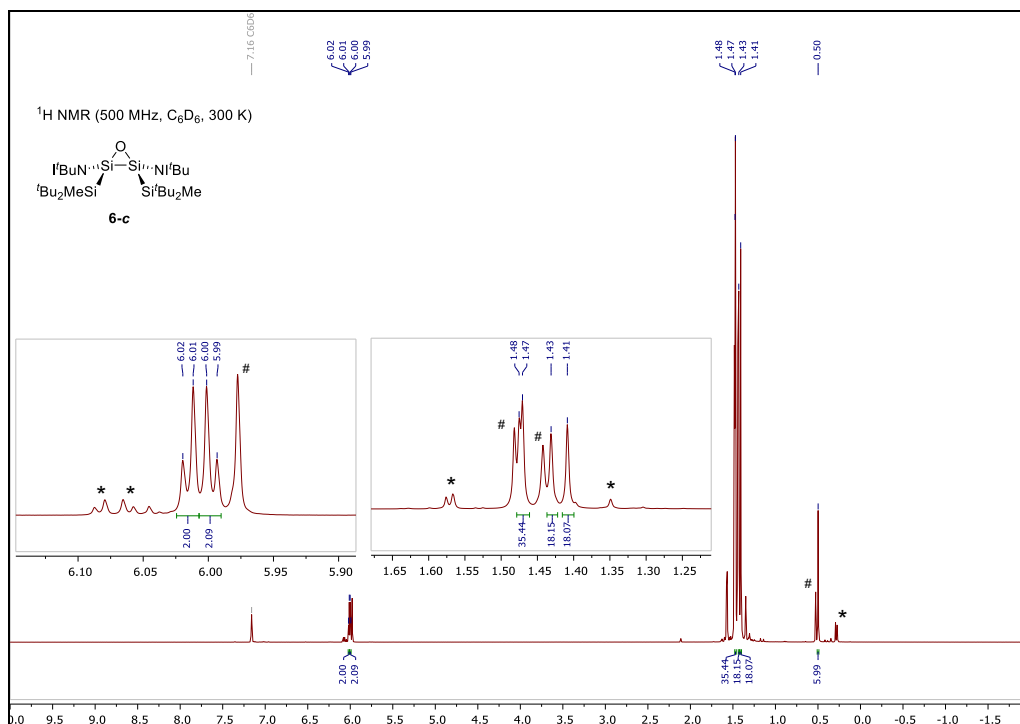

**Figure S27:** <sup>1</sup>H NMR spectrum (500 MHz) of compound **6-c** in C<sub>6</sub>D<sub>6</sub> at 300 K. Signals labeled with \* and # belong to compounds **6-t** (\*) and **5** (#).

Note: Due to signal overlap for the N<sup>t</sup>Bu groups (1.48 ppm and 1.47 ppm), separate integration was not possible.

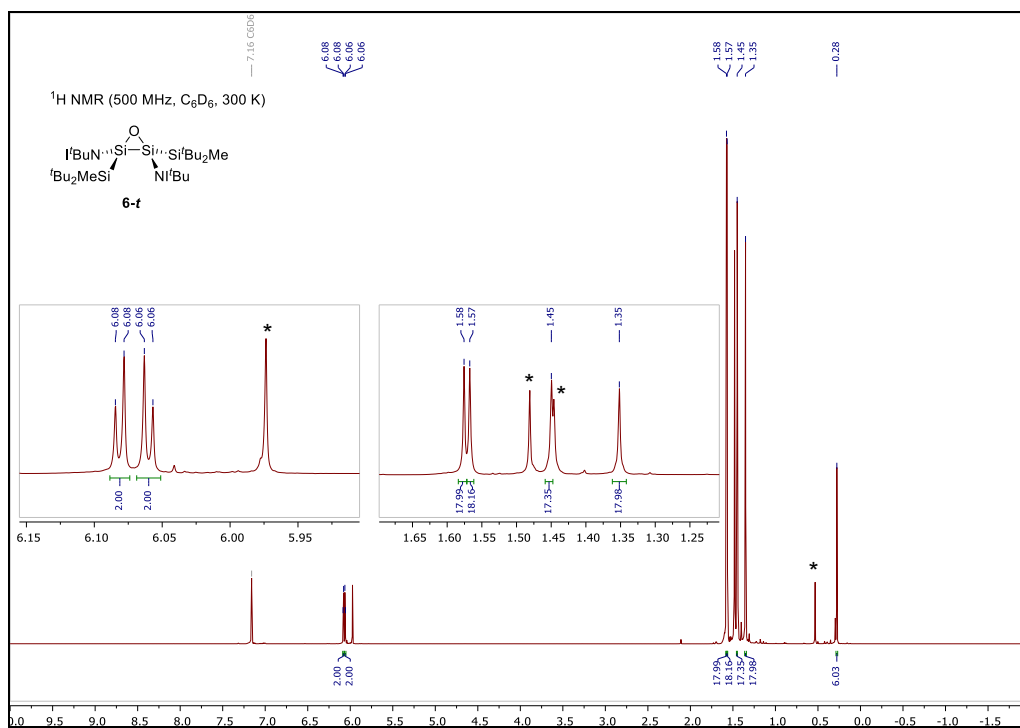

**Figure S28:** <sup>1</sup>H NMR spectrum (500 MHz) of compound **6-t** in C<sub>6</sub>D<sub>6</sub> at 300 K. Signals labeled with \* belong to compound **5**.

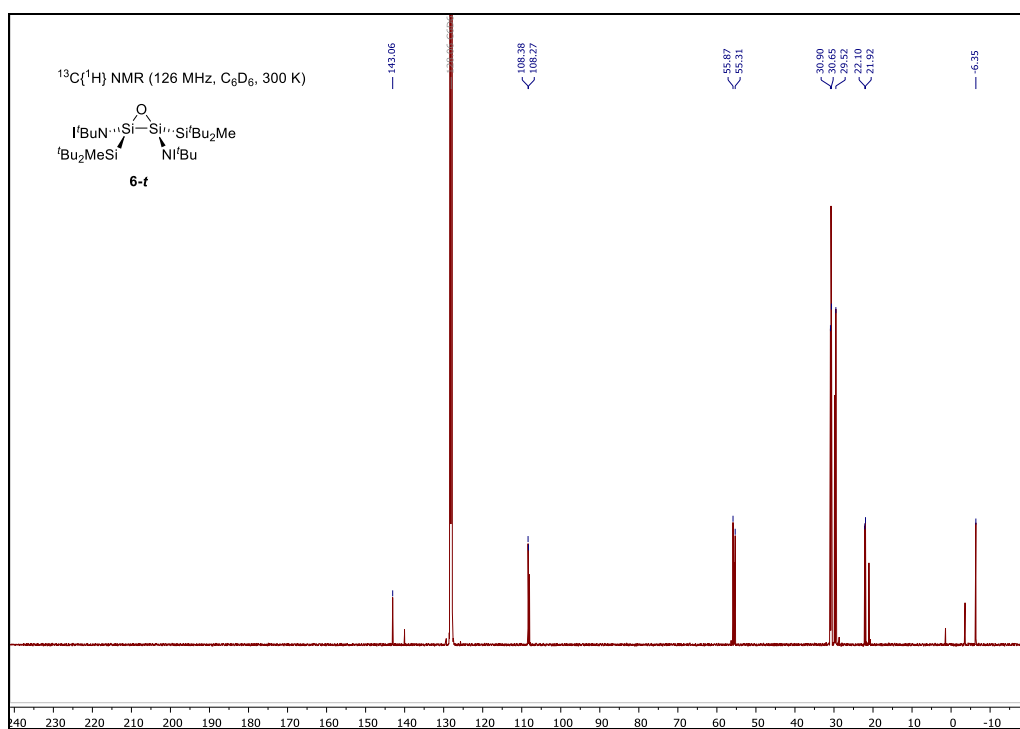

**Figure S29:** <sup>13</sup>C NMR spectrum (126 MHz) of compound **6-t** in C<sub>6</sub>D<sub>6</sub> at 300 K. Unlabeled signals belong to compound **5**.

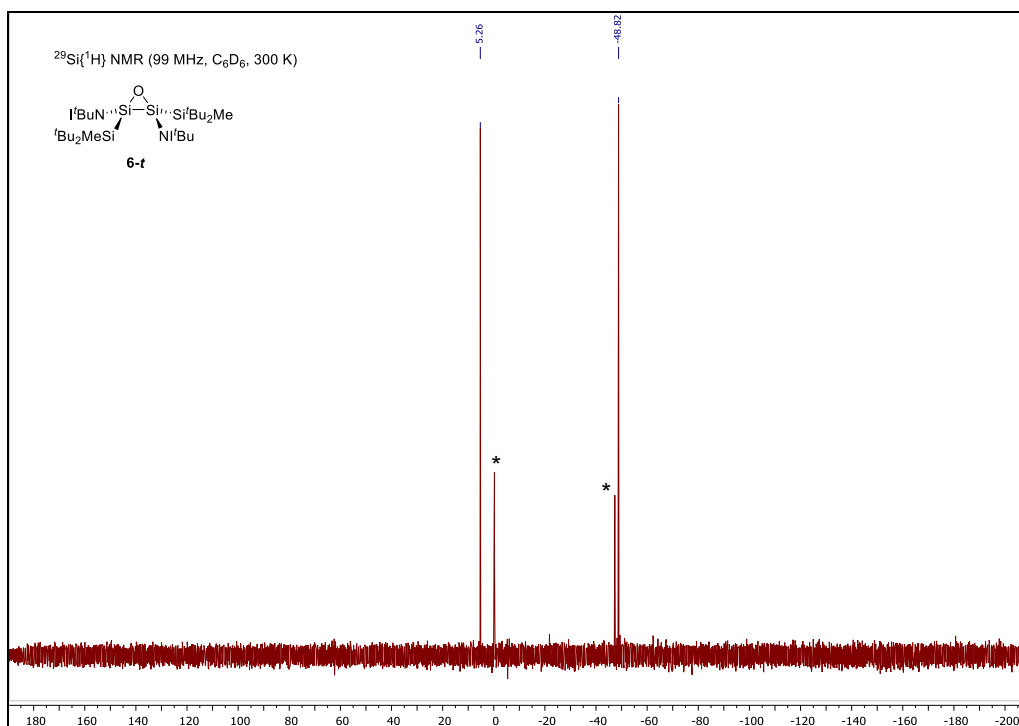

**Figure S30:**  $^{29}\text{Si}$  NMR spectrum (99 MHz) of compound **6-t** in  $\text{C}_6\text{D}_6$  at 300 K. Signals labeled with \* belong to compound **5**.

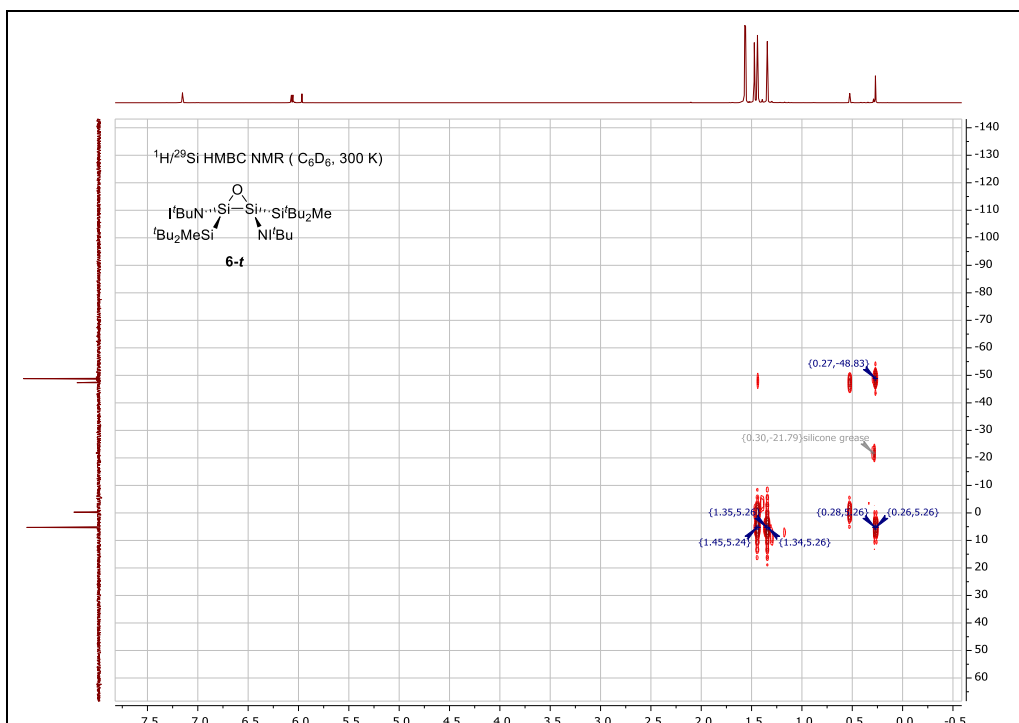

**Figure S31:**  $^1\text{H}/^{29}\text{Si}$  HMBC NMR spectrum of mixture of compounds **6-t** and **5** in  $\text{C}_6\text{D}_6$  at 300 K.

### 1.8. Radical Cation of $t\text{BuN}(t\text{Bu}_2\text{MeSi})\text{Si}=\text{Si}(\text{Si}^t\text{Bu}_2\text{Me})\text{N}^t\text{Bu}$ **7**

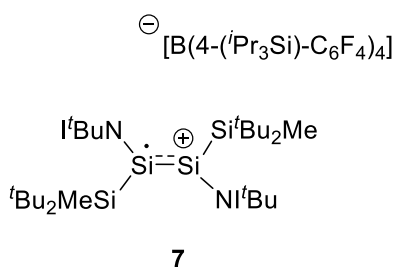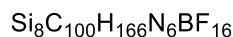

1991.12 g/mol

To a mixture of iminodisilene **2** (39.0 mg, 51.4  $\mu\text{mol}$ , 1.00 eq.) and the functionalized trityl (fluoroaryl)borate  $[\text{Ph}_3\text{C}][\text{B}(4-(t\text{Pr}_3\text{Si})-\text{C}_6\text{F}_4)_4]$  (75.8 mg, 51.4  $\mu\text{mol}$ , 1.00 eq.) toluene (4 mL) was added at room temperature. The reaction mixture turned dark green and a phase separation to a lower oily green layer and a top brown layer was observed. After evaporation of all volatile compounds *in vacuo*, the oily residue was washed with *n*-hexane (5  $\times$  3 mL) to give radical cation **7** as extremely air and moisture sensitive green powder (67.0 mg,

33.4  $\mu\text{mol}$ , 66% yield). Crystals almost suitable for SC-XRD analysis were obtained from diffusion of *n*-hexane into a difluorobenzene solution of **7** at ambient temperature.

Note: The TIPS-functionalized borate anion was used in order to facilitate crystallization. Utilization of the commercially available  $\text{B}(\text{C}_6\text{F}_5)_4$  anion also provides the disilene radical cation.

EPR (toluene, 286 K)  $g = 2.0029$ .

|            |                                                                   |                   |                               |
|------------|-------------------------------------------------------------------|-------------------|-------------------------------|
| <b>EA:</b> | $\text{Si}_8\text{C}_{100}\text{H}_{166}\text{BF}_{16}\text{N}_6$ | Calculated [%]:   | C (60.30), H (8.40), N (4.22) |
|            |                                                                   | Experimental [%]: | C (59.15), H (7.93), N (3.57) |

Note: Because of the extreme sensitivity of **7**, no better matching elemental analysis was obtained. The carbon value however was reproducibly low, presumably due to the formation of incombustible silicon carbides.

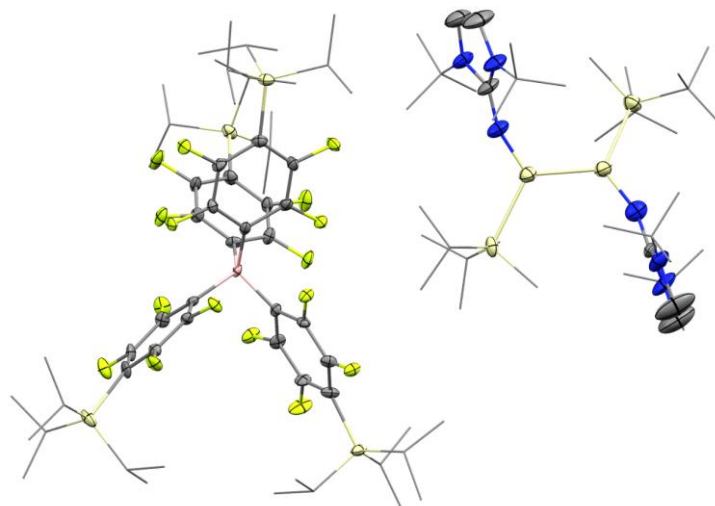

**Figure S32:** Solid state structure of compound **7**.

Note: Because of twinning and disorder, no satisfactory structure was obtained. Therefore, structural parameters cannot be discussed. Nonetheless, this structure reveals (*E*)-configuration of the substituents and three-coordinate silicon centers without interaction with solvent molecules or anions.

**Table S1:** Details for the EPR measurement of **7**.

| Parameters used for the EPR measurement of <b>7</b> * |         |
|-------------------------------------------------------|---------|
| solvent                                               | toluene |
| <i>T</i> [K]                                          | 286     |
| $\nu$ [GHz]                                           | 9.3109  |
| <i>MW</i> [mT]                                        | 0.04    |
| <i>TC</i> [s]                                         | 0.1     |
| <i>P</i> [mW]                                         | 5       |
| <i>RG</i> [dB]                                        | 40      |
| <i>CF</i> [mT]                                        | 331     |
| <i>SW</i> [mT]                                        | 10      |

\**T* = temperature,  $\nu$  = microwave frequency, *MW* = modulation width, *TC* = time constant, *P* = microwave power, *RG* = receiver gain, *CF* = center field, *SW* = sweep width

**Table S2:** Details for the simulated spectrum of **7**.

| Parameters used to simulate the spectrum of <b>7</b> * |            |
|--------------------------------------------------------|------------|
| <i>g</i>                                               | 2.0029     |
| $a(^{29}\text{Si}^{\text{Central}})/n$                 | 1.897 mT/2 |
| $a(^{14}\text{N}^{\text{NHI-exo}})/n$                  | 0.250 mT/2 |
| $a(^{14}\text{N}^{\text{NHI-endo}})/n$                 | 0.133 mT/4 |
| <i>lwpp</i>                                            | 0.103 mT   |

\**a* = hyperfine coupling constants, *n* = number of equivalent nuclei, *lwpp* = linewidth peak-to-peak (Gaussian)

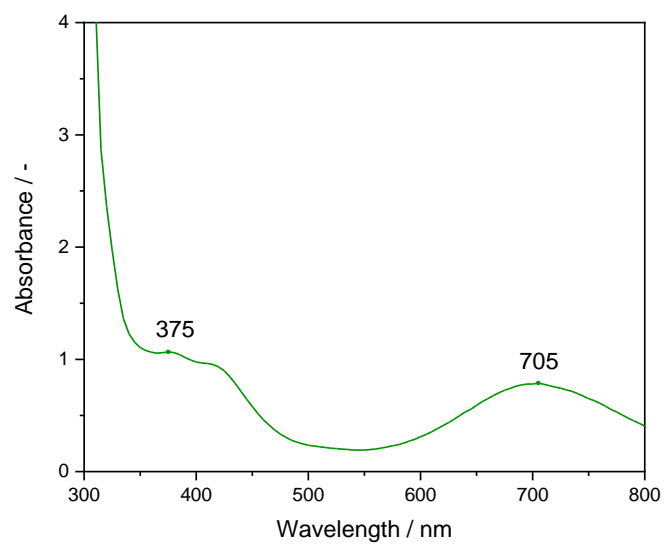

**Figure S33:** UV-vis spectrum of disilene radical cation **7** in 1,2-difluorobenzene, measured at room temperature.

## 1.9. Compound 8

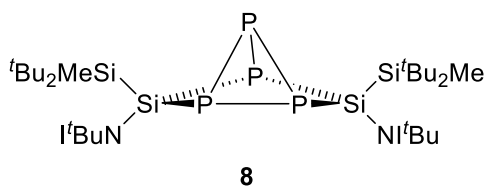

**8**

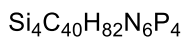

883.37 g/mol

Under exclusion of light, white phosphorus (4.89 mg, 39.5  $\mu\text{mol}$ , 1.00 eq.) was added to a solution of disilene **8** (30.0 mg, 39.5  $\mu\text{mol}$ , 1.00 eq.) in toluene (2 mL) at room temperature. The dark red color completely vanished within 18 hours stirring to give a slightly cloudy, pale yellow mixture.

After filtration and evaporation of the solvent, compound **8** was obtained as colorless crystalline solid (32.9 mg, 37.2  $\mu\text{mol}$ , 94%). Crystals suitable for SC-XRD analysis were obtained from a cooled ( $-35\text{ }^\circ\text{C}$ ) solution of **8** in a toluene / *n*-hexane (1:1) mixture.

**m.p.:** 218  $^\circ\text{C}$  (decomposition, color change to yellow).

**$^1\text{H}$  NMR (500 MHz,  $\text{C}_6\text{D}_6$ , 300 K):**  $\delta$  [ppm] = 5.86 (d,  $^3J = 3.2$  Hz, 2H,  $\text{CH-N}$ ), 5.78 (d,  $^3J = 3.2$  Hz, 2H,  $\text{CH-N}$ ), 1.65 (s, 18H,  $\text{tBu}_2\text{MeSi}$ ), 1.61 (s, 18H,  $\text{tBu}_2\text{MeSi}$ ), 1.35 (s, 18H,  $\text{NtBu}$ ), 1.29 (s, 18H,  $\text{NtBu}$ ), 0.73 (s, 6H,  $\text{tBu}_2\text{MeSi}$ ).

**$^{13}\text{C}\{^1\text{H}\}$  NMR (100 MHz,  $\text{C}_6\text{D}_6$ , 300 K):**  $\delta$  [ppm] = 140.7 ( $\text{C}=\text{N}$ ), 108.8 ( $\text{CH-N}$ ), 108.1 ( $\text{CH-N}$ ), 55.9 ( $\text{NC}(\text{CH}_3)_3$ ), 55.2 ( $\text{NC}(\text{CH}_3)_3$ ), 31.8 ( $\text{Si}(\text{C}(\text{CH}_3)_3)_2(\text{CH}_3)$ ), 31.6 ( $\text{Si}(\text{C}(\text{CH}_3)_3)_2(\text{CH}_3)$ ), 30.6 ( $\text{NC}(\text{CH}_3)_3$ ), 30.3 ( $\text{NC}(\text{CH}_3)_3$ ), 23.0 ( $\text{Si}(\text{C}(\text{CH}_3)_3)_2(\text{CH}_3)$ ), 23.0 ( $\text{Si}(\text{C}(\text{CH}_3)_3)_2(\text{CH}_3)$ ),  $-1.7$  ( $\text{Si}(\text{C}(\text{CH}_3)_3)_2(\text{CH}_3)$ ).

**$^{29}\text{Si}\{^1\text{H}\}$  NMR (99 MHz,  $\text{C}_6\text{D}_6$ , 300 K):**  $\delta$  [ppm] = 11.9 (s,  $\text{tBu}_2\text{MeSi}$ ),  $-52.2$  (m,  $\text{SiP}_2$ ).

**$^{31}\text{P}\{^1\text{H}\}$  NMR (162 MHz,  $\text{C}_6\text{D}_6$ , 300 K):**  $\delta$  [ppm] = 106.6 (dt,  $^1J_{\text{P-P}} = 126.9$  Hz,  $^2J_{\text{P-P}} = 8.5$  Hz, 1P,  $\text{PSi}_2$ ),  $-44.0$  (dd,  $^1J_{\text{P-P}} = 158.1$  Hz,  $^2J_{\text{P-P}} = 8.9$  Hz, 2P,  $\text{PSiP}_2$ ),  $-217.6$  (dt,  $^1J_{\text{P-P}} = 157.9$  Hz,  $^1J_{\text{P-P}} = 129.0$  Hz, 1P,  $\text{PP}_3$ ).

**EA:**  $\text{Si}_4\text{C}_{40}\text{H}_{82}\text{N}_6\text{P}_4$  Calculated [%]: C (54.39), H (9.36), N (9.51)

Experimental [%]: C (54.14), H (9.25), N (9.35).



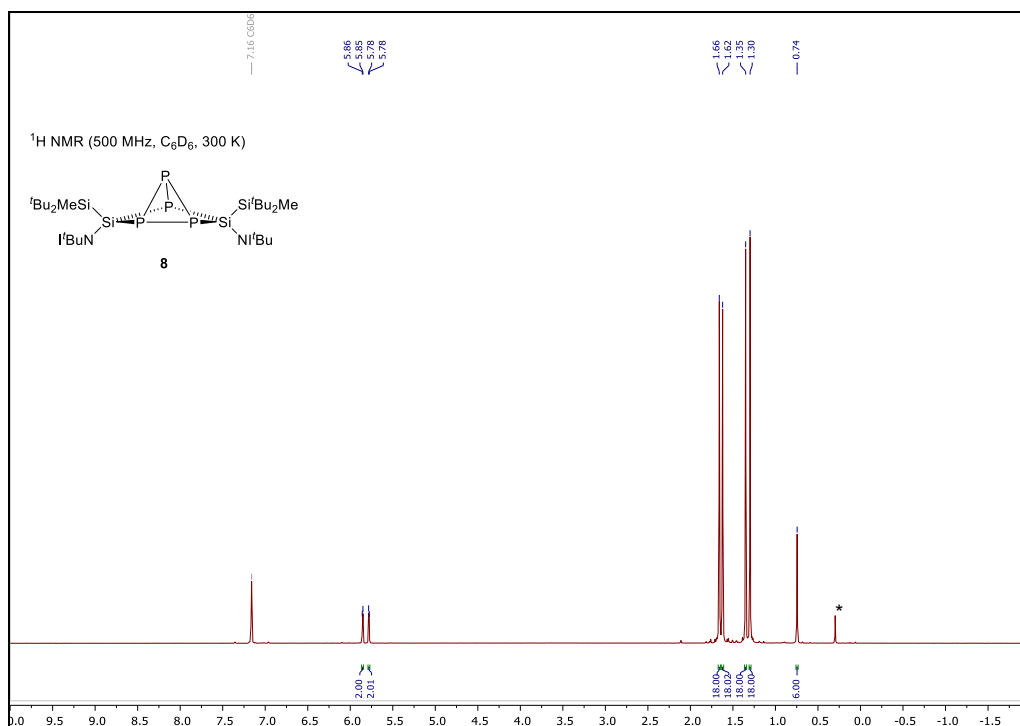

**Figure S34:** <sup>1</sup>H NMR spectrum (500 MHz) of compound **8** in C<sub>6</sub>D<sub>6</sub> at 300 K. The signal labeled with \* belongs to silicone grease.

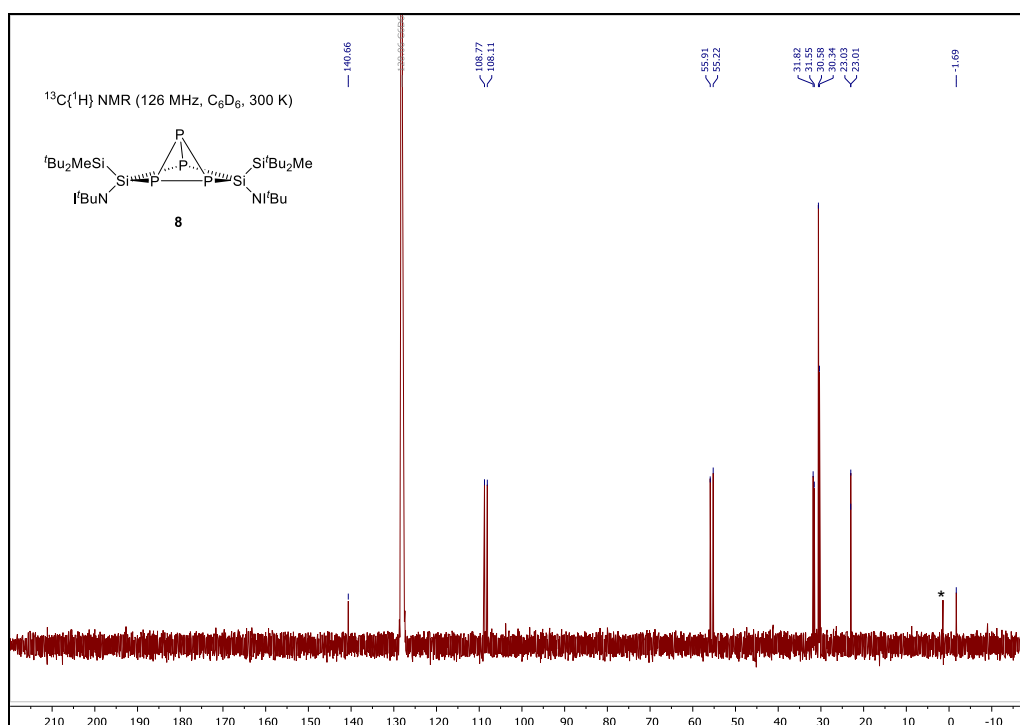

**Figure S35:** <sup>13</sup>C{<sup>1</sup>H} NMR spectrum (126 MHz) of compound **8** in C<sub>6</sub>D<sub>6</sub> at 300 K. The signal labeled with \* belongs to silicone grease.

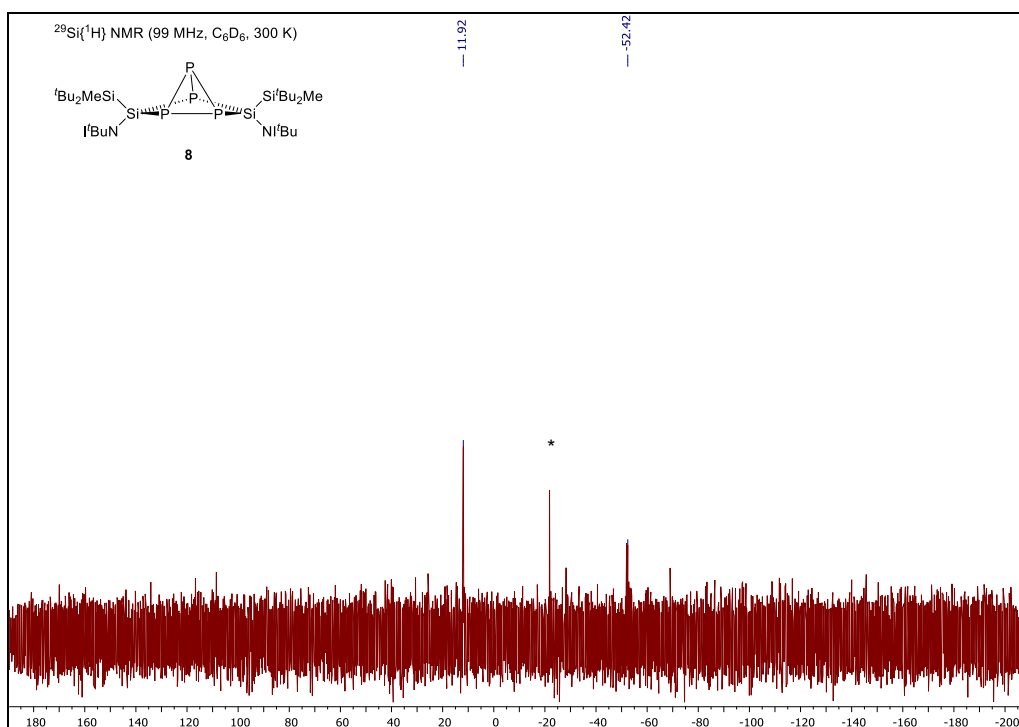

**Figure S36:**  $^{29}\text{Si}\{^1\text{H}\}$  NMR spectrum (99 MHz) of compound **8** in  $\text{C}_6\text{D}_6$  at 300 K. The signal labeled with \* belongs to silicone grease.

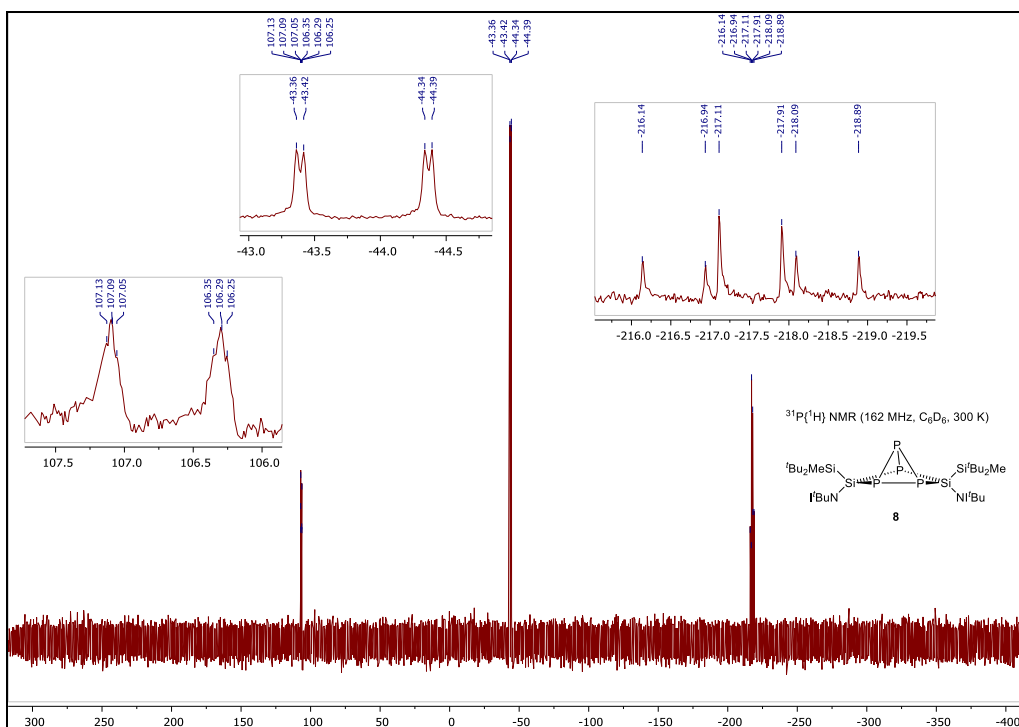

**Figure S37:**  $^{31}\text{P}\{^1\text{H}\}$  spectrum (162 MHz) of compound **8** in  $\text{C}_6\text{D}_6$  at 300 K.

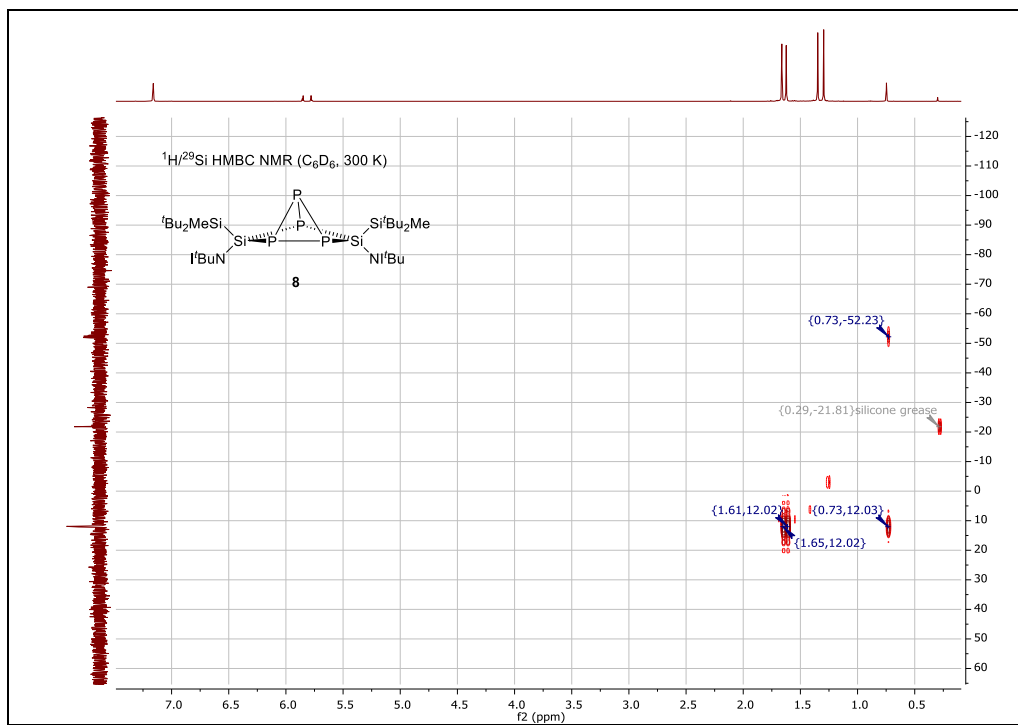

**Figure S38:**  $^1\text{H}/^{29}\text{Si}$  HMBC NMR spectrum of compound **8** in  $\text{C}_6\text{D}_6$  at 300 K.

### 1.10. Compound 9

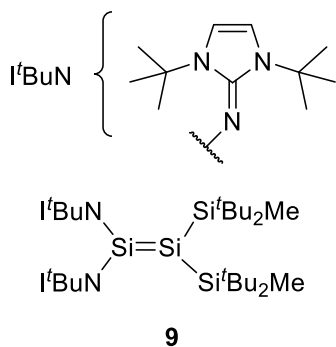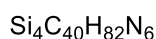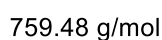

A solution of disilene  $t\text{BuN}(t\text{Bu}_2\text{MeSi})\text{Si}=\text{Si}(\text{Si}^t\text{Bu}_2\text{Me})\text{N}^t\text{Bu}$  (**2**) (100 mg, 132  $\mu\text{mol}$ ) in toluene (5 mL) was heated in a pressurizable Schlenk flask to 115  $^\circ\text{C}$  for 4 days. After filtration, the solution was concentrated *in vacuo* and cooled to  $-35$   $^\circ\text{C}$  for crystallization. Compound **9** was obtained as purple crystals (75.4 mg, 75% yield). These crystals were also suitable for SC-XRD analysis.

Note: The crystals are only slightly soluble in *n*-hexane, however they show good solubility in toluene and benzene. Although the crystals are purple, the resulting solution is deep red.

**m.p.:** 65  $^\circ\text{C}$  (decomposition, color change to black).

$^1\text{H}$  NMR (500 MHz,  $\text{C}_6\text{D}_6$ , 300 K):  $\delta$  [ppm] = 6.00 (s, 4H,  $\text{CH-N}$ ), 1.54 (s, 36H,  $t\text{BuN}$ ), 1.50 (s, 36H,  $t\text{Bu}_2\text{MeSi}$ ), 0.36 (s, 6H,  $t\text{Bu}_2\text{MeSi}$ ).

$^{13}\text{C}\{^1\text{H}\}$  NMR (126 MHz,  $\text{C}_6\text{D}_6$ , 300 K):  $\delta$  [ppm] = 139.2 ( $\text{C}=\text{N}$ ), 108.3 ( $\text{CH-N}$ ), 55.9 ( $\text{N}(\text{C}(\text{CH}_3)_3)$ ), 31.4 ( $\text{Si}(\text{C}(\text{CH}_3)_3)_2(\text{CH}_3)$ ), 29.5 ( $\text{NC}(\text{CH}_3)_3$ ), 22.6 ( $\text{Si}(\text{C}(\text{CH}_3)_3)_2(\text{CH}_3)$ ),  $-3.0$  ( $\text{Si}(\text{C}(\text{CH}_3)_3)_2(\text{CH}_3)$ ).

$^{29}\text{Si}\{^1\text{H}\}$  NMR (99 MHz,  $\text{C}_6\text{D}_6$ , 300 K):  $\delta$  [ppm] = 30.4 ( $=\text{SiN}_2$ ), 23.0 ( $t\text{Bu}_2\text{MeSi}$ ),  $-176.1$  ( $=\text{SiSi}_2$ ).

**EA:**  $\text{Si}_4\text{C}_{40}\text{H}_{82}\text{N}_6$  Calculated: C (63.26), H (10.88), N (11.07)

Experimental: C (63.12), H (10.93), N (11.05).

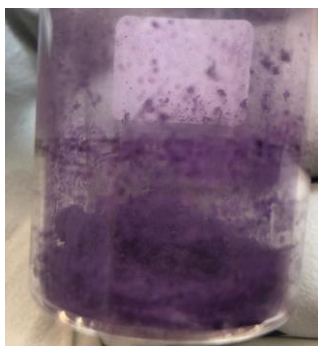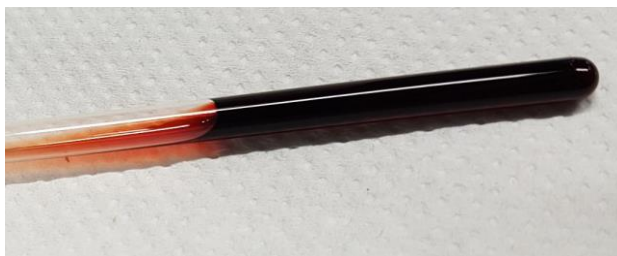

**Figure S39:** Dark purple solid of iminodisilene **9** (left) and red benzene solution of **9** (right).

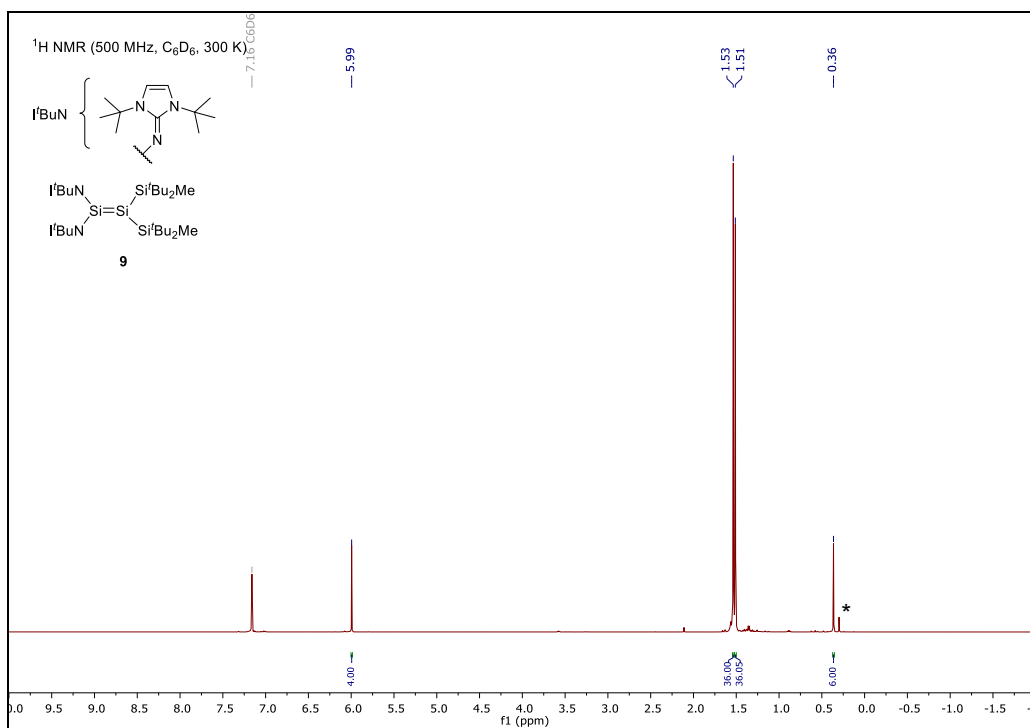

**Figure S40:** <sup>1</sup>H NMR spectrum (500 MHz) of compound **9** in C<sub>6</sub>D<sub>6</sub> at 300 K. Signal labeled with \* belongs to silicone grease.

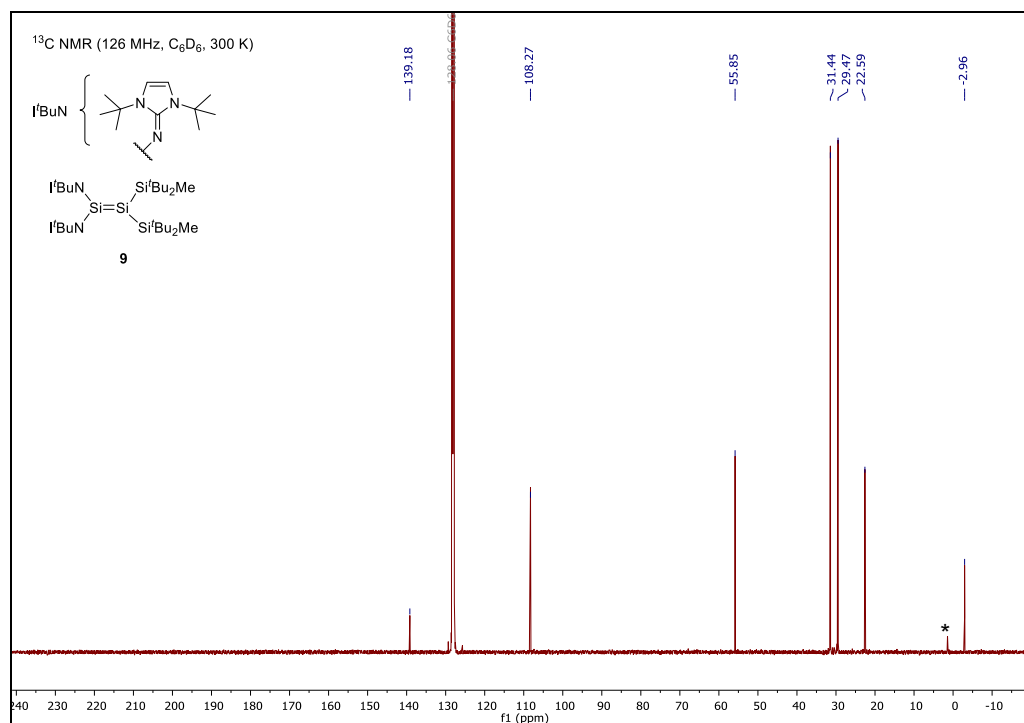

**Figure S41:** <sup>13</sup>C NMR spectrum (126 MHz) of compound **9** in C<sub>6</sub>D<sub>6</sub> at 300 K. Signal labeled with \* belongs to silicone grease.

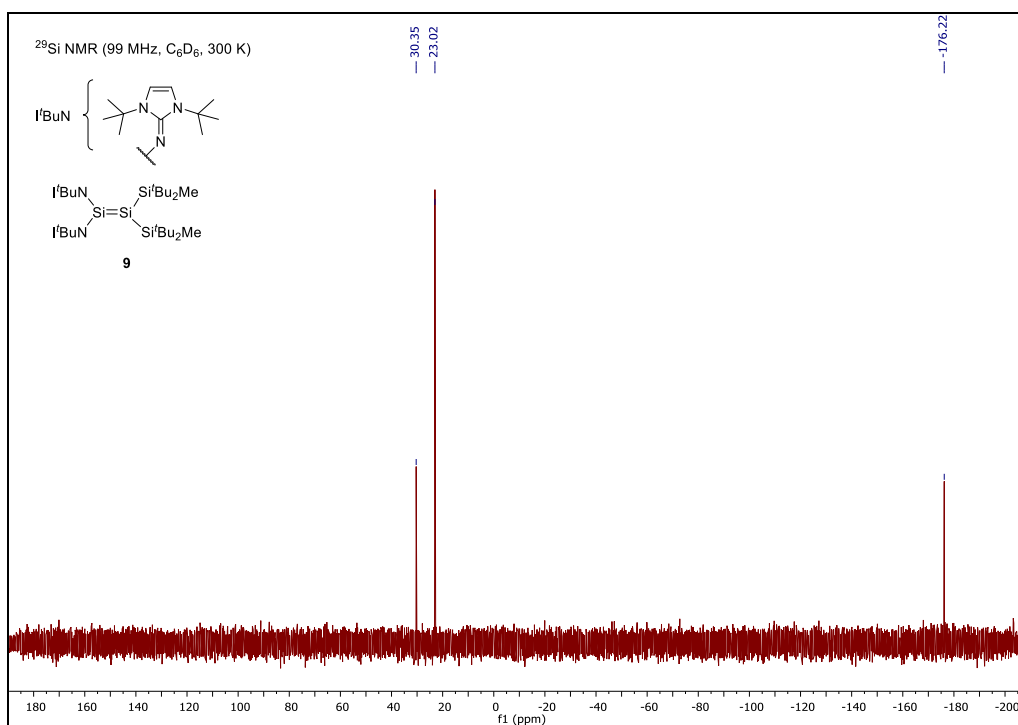

**Figure S42:** <sup>29</sup>Si NMR spectrum (99 MHz) of compound **9** in C<sub>6</sub>D<sub>6</sub> at 300 K.

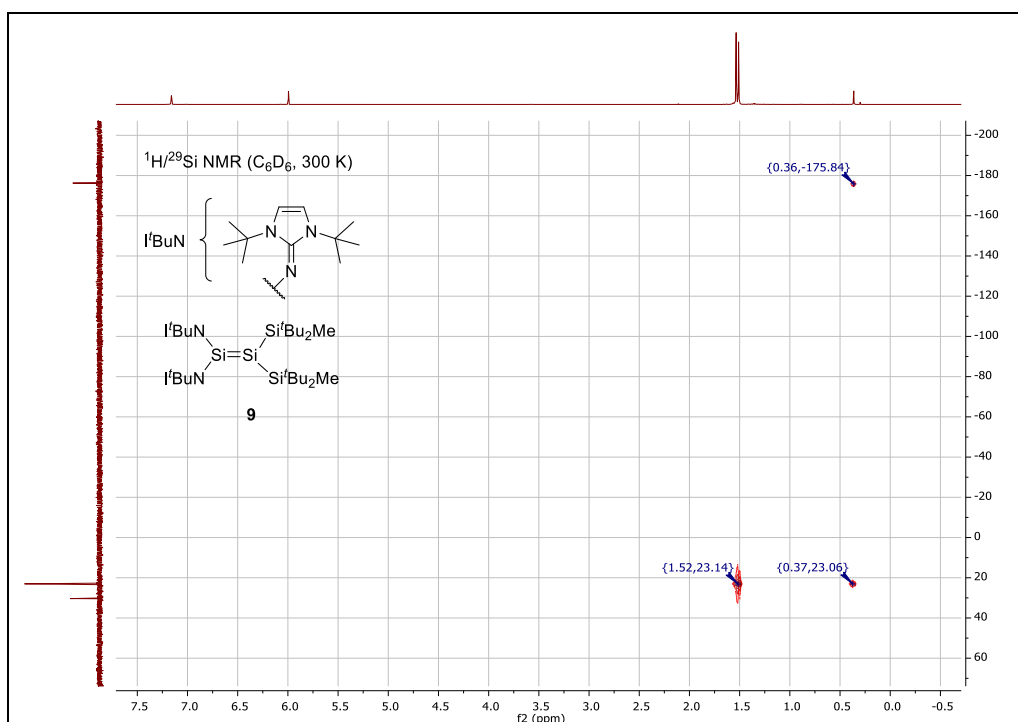

**Figure S43:** <sup>1</sup>H/<sup>29</sup>Si HMBC NMR spectrum of compound **9** in C<sub>6</sub>D<sub>6</sub> at 300 K.

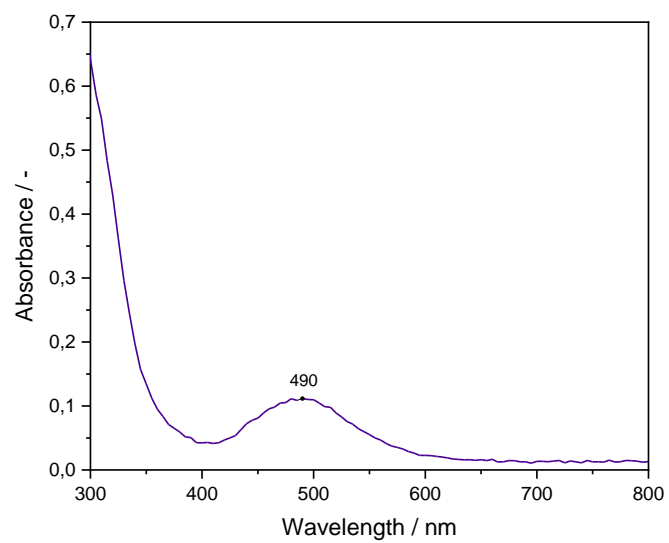

**Figure S44:** UV-vis spectrum of disilene **9** in toluene ( $2.5 \times 10^{-3}$  M), measured at room temperature ( $\lambda_{\text{max}} = 490$  nm ( $\epsilon = 45$  L mol $^{-1}$  cm $^{-1}$ )).

## 2. X-ray Crystallographic Data

### 2.1 General Information

The X-ray intensity data of **5** were collected on an X-ray single crystal diffractometer equipped with a CMOS detector (*Bruker Photon-100*), a rotating anode (*Bruker TXS*) with MoK $\alpha$  radiation ( $\lambda = 0.71073 \text{ \AA}$ ) and a *Helios* mirror optic by using the *APEX III* software package.<sup>59</sup> The X-ray intensity data of **1**, **2-(Z)**, **3**, **4**, **8** and **9** were collected on an X-ray single crystal diffractometer equipped with a CMOS detector (*Bruker Photon-100*), an IMS microsource with MoK $\alpha$  radiation ( $\lambda = 0.71073 \text{ \AA}$ ) and a *Helios* mirror optic by using the *APEX III* software package.<sup>59</sup> The measurements were performed on single crystals coated with the perfluorinated ether *Fomblin*<sup>®</sup> Y. The crystal was fixed on the top of a micro sampler, transferred to the diffractometer and frozen under a stream of cold nitrogen. A matrix scan was used to determine the initial lattice parameters. Reflections were merged and corrected for Lorentz and polarization effects, scan speed, and background using *SAINT*.<sup>510</sup> Absorption corrections, including odd and even ordered spherical harmonics were performed using *SADABS*.<sup>510</sup> Space group assignments were based upon systematic absences, E statistics, and successful refinement of the structures. Structures were solved by direct methods with the aid of successive difference Fourier maps, and were refined against all data using the *APEX III* software in conjunction with *SHELXL-2014*<sup>511</sup> and *SHELXL*.<sup>512</sup> All H atoms (except Si–H) were placed in calculated positions and refined using a riding model, with methylene and aromatic C–H distances of 0.99 and 0.95  $\text{\AA}$ , respectively, and  $U_{\text{iso}}(\text{H}) = 1.2 \cdot U_{\text{eq}}(\text{C})$ . H atoms bound to Si atoms could be located in the difference Fourier maps and were allowed to refine freely. Full-matrix least-squares refinements were carried out by minimizing  $\Delta w(F_o^2 - F_c^2)$ <sup>510</sup> with *SHELXL-97* weighting scheme.<sup>513</sup> Neutral atom scattering factors for all atoms and anomalous dispersion corrections for the non-hydrogen atoms were taken from International Tables for Crystallography.<sup>514</sup> The images of the crystal structures were generated by *Mercury*.<sup>515</sup> The CCDC numbers - contain the supplementary crystallographic data for the structures. These data can be obtained free of charge from the Cambridge Crystallographic Data Centre via <https://www.ccdc.cam.ac.uk/structures/>.



## 2.2 SC-XRD structures

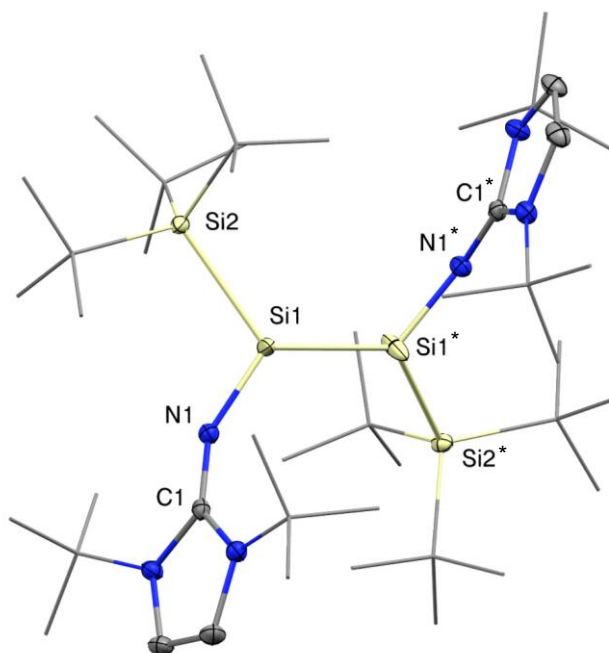

**Figure S45:** SC-XRD structure of disilene **1** with thermal ellipsoids drawn at the 50% probability level. Hydrogen atoms are omitted for clarity, <sup>t</sup>Bu and Me groups are simplified as wireframes. Selected bond lengths [Å] and angles [°]: Si1–Si1\* 2.2534(7), Si1–Si2 2.4142(6), Si1–N1 1.682(1), N1–C1 1.285(2), N1–Si1–Si1\* 122.97(5), Si2–Si1–Si1\* 124.52(3), Si2–Si1–N1 110.56(4).

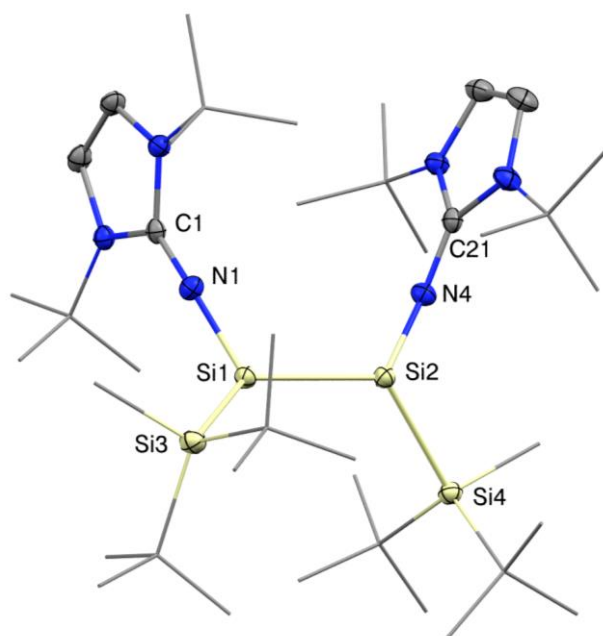

**Figure S46:** SC-XRD structure of disilene **2-(Z)** with thermal ellipsoids drawn at the 50% probability level. Hydrogen atoms are omitted for clarity, <sup>t</sup>Bu and Me groups are simplified as wireframes. Selected bond lengths [Å] and angles [°]: Si1–Si2 2.2844(7), Si1–Si3 2.3922(7), Si2–Si4 2.4001(7), Si1–N1 1.683(1), Si2–N4 1.680(1), N1–C1 1.283(2), N4–C21 1.278(2), Si3–Si1–N1 104.35(5), Si4–Si2–N4 103.84(5), Si2–Si1–Si3 121.28(2), Si2–Si1–N1 119.25(5).

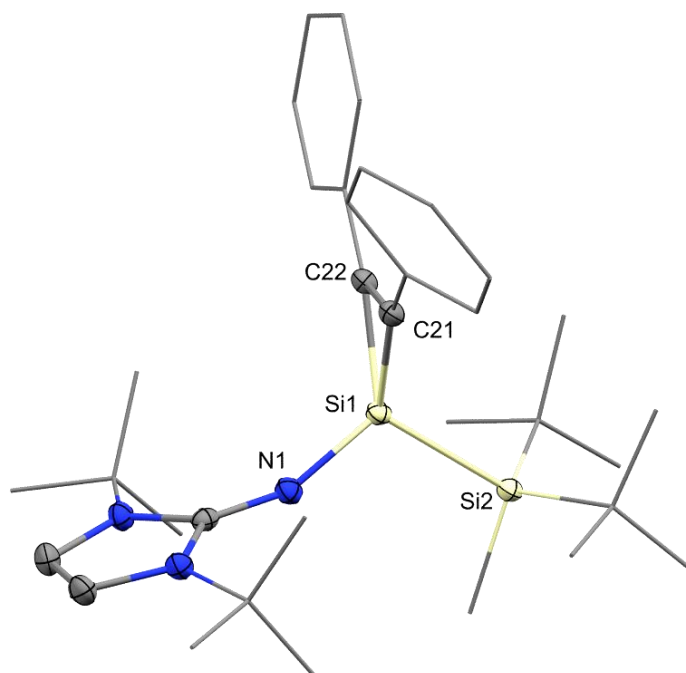

**Figure S47:** SC-XRD structure of **3** with thermal ellipsoids drawn at the 50% probability level. Hydrogen atoms are omitted for clarity, <sup>t</sup>Bu and Me groups are simplified as wireframes. Selected bond lengths [Å] and angles [°]: Si1–Si2 2.3606(7), Si1–N1 1.659(1), Si1–C21 1.840(2), Si1–C22 1.548(2), C21–C22 1.353(2), N1–Si1–Si2 107.59(5), N1–Si1–C21 123.22(7), N1–Si1–C22 124.66(7).

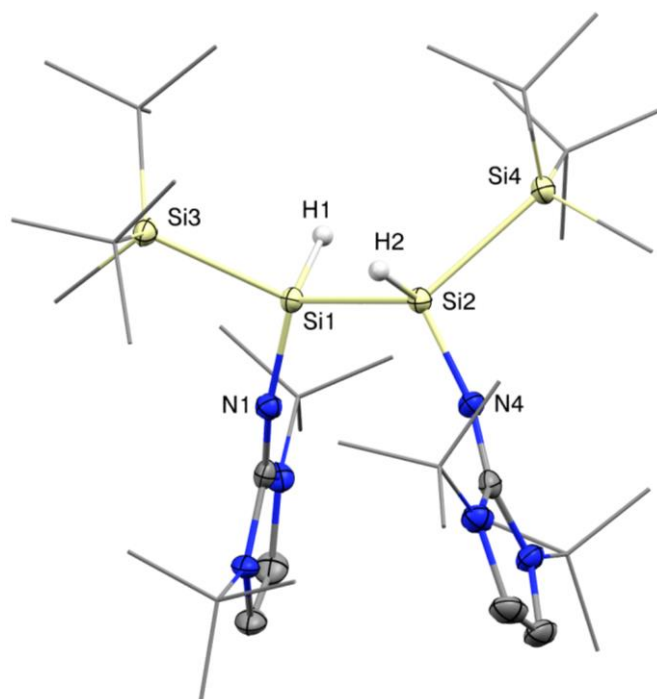

**Figure S48:** SC-XRD structure of hydrosilane **4** with thermal ellipsoids drawn at the 50% probability level. Hydrogen atoms are omitted for clarity, <sup>t</sup>Bu and Me groups are simplified as wireframes. Selected bond lengths [Å] and angles [°]: Si1–Si2 2.4184(6), Si1–H1 1.43(1), Si1–Si3 2.4085(6), Si1–N1 1.682(1), Si2–H2 1.42(2), H1–Si1–Si3 101.1(6), N1–Si1–H1 113.9(6), N1–Si1–Si2 111.91(4), Si2–Si1–Si3 120.40(2).

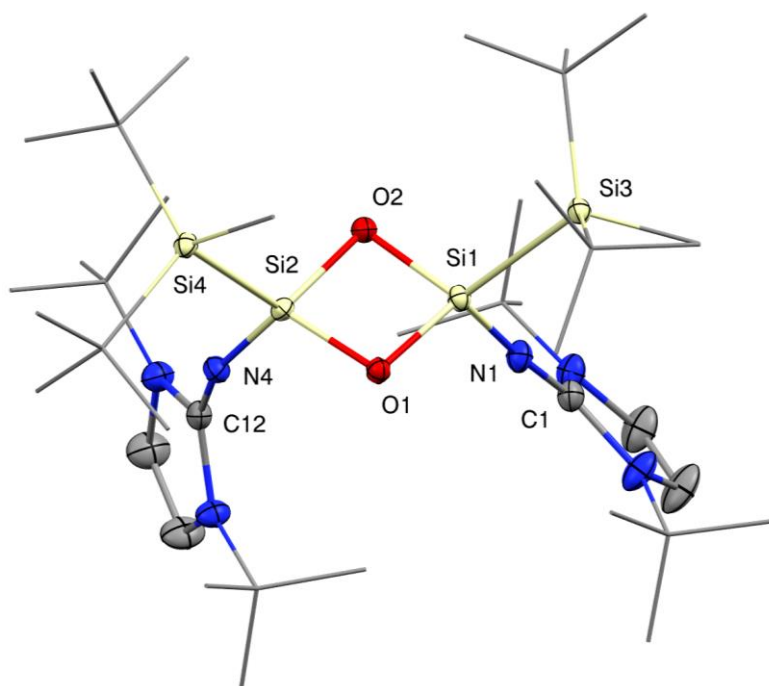

**Figure S49:** SC-XRD structure of compound **5** with thermal ellipsoids drawn at the 50% probability level. Hydrogen atoms are omitted for clarity, <sup>t</sup>Bu and Me groups are simplified as wireframes. Selected bond lengths [Å] and angles [°]: Si1–O1 1.686(1), Si1–O2 1.695(1), Si1–Si3 2.3897(6), Si1–N1 1.641(1), N1–C1 1.274(2), Si2–O1 1.698(1), Si2–O2 1.691(1), Si3–Si1–O1 119.63(4), Si3–Si1–O2 114.96(4), Si3–Si1–N1 106.06(5), Si1–O1–Si2 91.77(5).

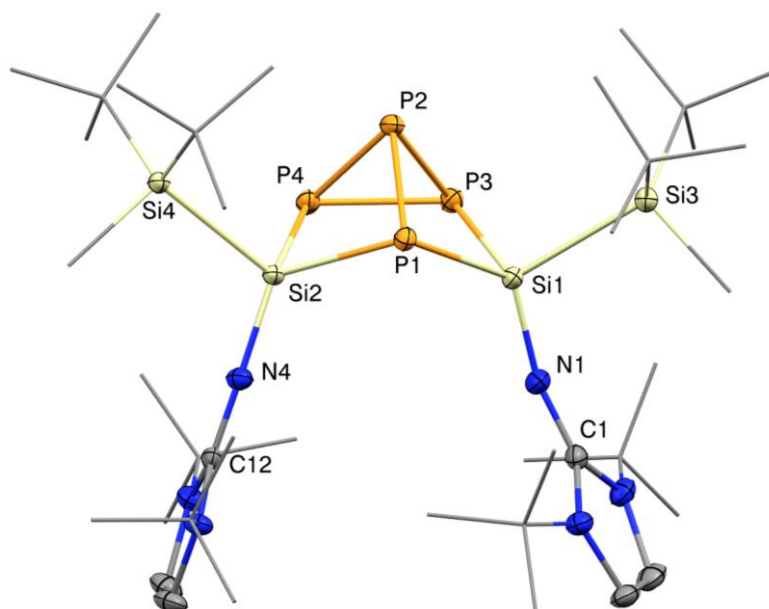

**Figure S50:** SC-XRD structure of compound **8** with thermal ellipsoids drawn at the 50% probability level. Hydrogen atoms are omitted for clarity, <sup>t</sup>Bu and Me groups are simplified as wireframes. Selected bond lengths [Å] and angles [°]: Si1–P1 2.2785(8), Si1–P3 2.2723(7), P1–P2 2.2937(7), P3–P2 2.2301(8), N1–Si1–Si3 109.32(4), P1–Si1–P3 94.22(2), P1–P2–P3 94.95(2), Si1–P1–Si2 106.69(2).

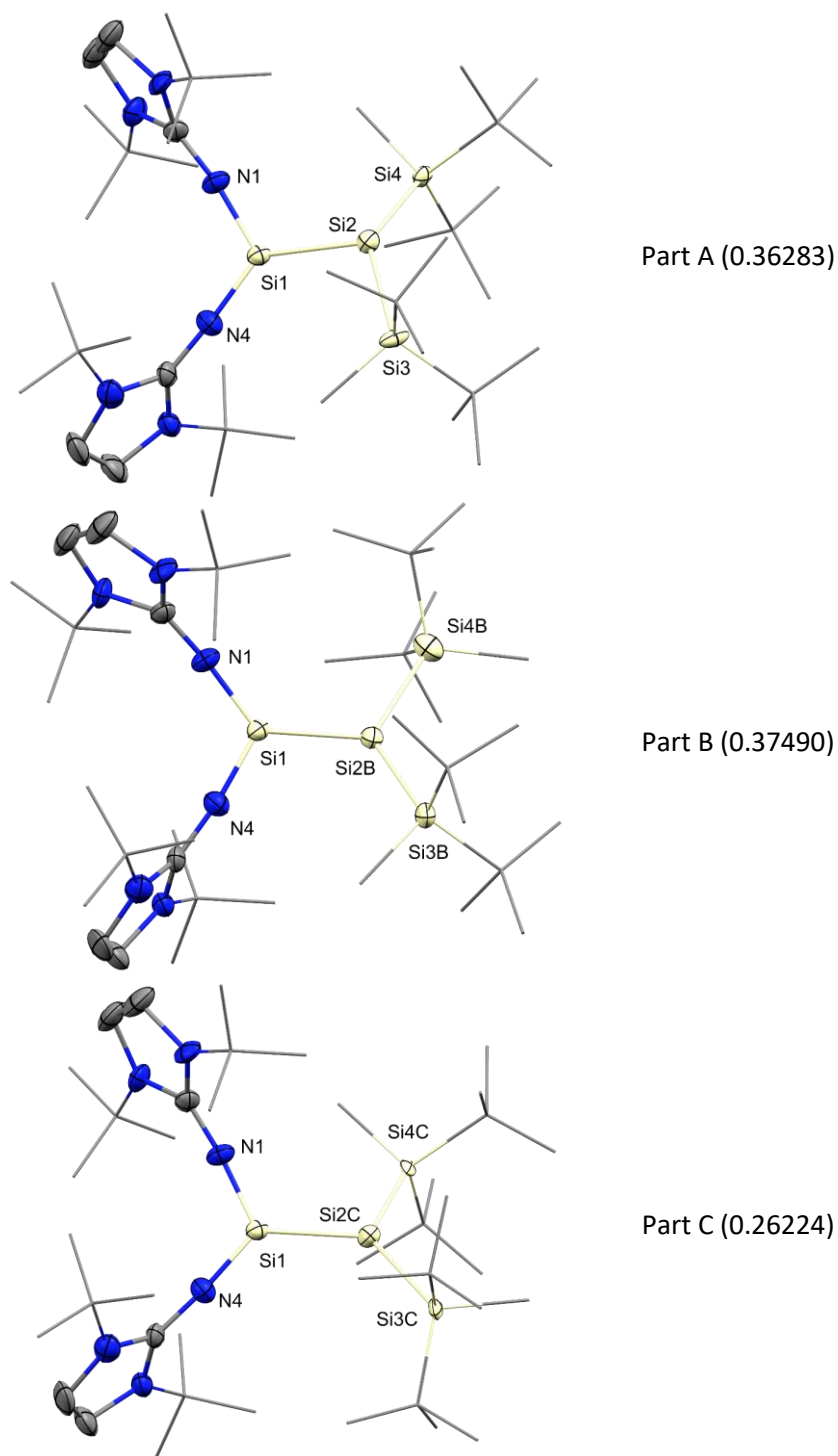

**Figure S51:** SC-XRD structure of disilene **9** (including the disordered silyl groups) with thermal ellipsoids drawn at the 30% probability level and occupation ratio of the disordered groups. Hydrogen atoms are omitted for clarity, <sup>t</sup>Bu and Me groups are simplified as wireframes. For more information, the full crystallographic information file is available free of charge from the Cambridge Crystallographic Data Centre via <https://www.ccdc.cam.ac.uk/structures/> (cf. CCDC-2059209). Selected bond lengths [Å] and angles [°] Part A: Si1–Si2 2.219(4), Si1–N1 1.659(4), Si1–N4 1.604(4), Si2–Si3 2.360(6), Si2–Si4 2.343(5), N1–Si1–N4 113.1(2), Si3–Si2–Si4 138.2(2), Si1–Si2–Si3 106.3(2), Si2–Si1–N1 115.4(2),  $\theta(\text{Silyl}/\text{NHI})$  40.3/8.1,  $\tau$  46.9; Part B: Si1–Si2B 2.246(3), Si2B–Si3B 2.382(6), Si2B–Si4B 2.344(5), Si3B–Si2B–Si4B 126.3(2), Si1–Si2B–Si3B 105.0(2), Si2B–Si1–N1 130.0(2),  $\theta(\text{Silyl}/\text{NHI})$  26.2/6.7,  $\tau$  45.2; Part C: Si1–Si2C 2.203(5), Si2C–Si3C 2.371(7), Si2C–Si4C 2.351(8), Si3C–Si2C–Si4C 126.6(3), Si1–Si2C–Si3C 124.0(3), Si2C–Si1–N1 118.2(2),  $\theta(\text{Silyl}/\text{NHI})$  4.9/1.1,  $\tau$  41.0.

## 2.3 Crystal data and structural refinement parameters

**Table S3:** Crystal data and structural refinement parameters for compounds **1-(E)**, **2-(Z)**, **3** and **4**.

| Compound #                          | 1-(E)                                                                                                                                                         | 2-(Z)                                                                                                                                                         | 3                                                                                                                                                             | 4                                                                                                                                                             |
|-------------------------------------|---------------------------------------------------------------------------------------------------------------------------------------------------------------|---------------------------------------------------------------------------------------------------------------------------------------------------------------|---------------------------------------------------------------------------------------------------------------------------------------------------------------|---------------------------------------------------------------------------------------------------------------------------------------------------------------|
| CCDC #                              | 2059203                                                                                                                                                       | 2059204                                                                                                                                                       | 2059205                                                                                                                                                       | 2059206                                                                                                                                                       |
| Chemical formula                    | Si <sub>4</sub> C <sub>46</sub> H <sub>94</sub> N <sub>6</sub>                                                                                                | Si <sub>4</sub> C <sub>40</sub> H <sub>82</sub> N <sub>6</sub>                                                                                                | Si <sub>2</sub> C <sub>34</sub> H <sub>51</sub> N <sub>3</sub>                                                                                                | Si <sub>4</sub> C <sub>40</sub> H <sub>84</sub> N <sub>6</sub>                                                                                                |
| Formula weight                      | 843.62                                                                                                                                                        | 759.47                                                                                                                                                        | 557.96                                                                                                                                                        | 761.49                                                                                                                                                        |
| Temperature                         | 100(2) K                                                                                                                                                      | 100(2) K                                                                                                                                                      | 100(2) K                                                                                                                                                      | 100(2) K                                                                                                                                                      |
| Wavelength                          | 0.71073 Å                                                                                                                                                     | 0.71073 Å                                                                                                                                                     | 0.71073 Å                                                                                                                                                     | 0.71073 Å                                                                                                                                                     |
| Crystal size                        | 0.155 × 0.182 × 0.186 mm                                                                                                                                      | 0.185 × 0.228 × 0.254 mm                                                                                                                                      | 0.098 × 0.148 × 0.285 mm                                                                                                                                      | 0.266 × 0.333 × 0.487 mm                                                                                                                                      |
| Crystal habit                       | clear dark green fragment                                                                                                                                     | clear red fragment                                                                                                                                            | clear colorless fragment                                                                                                                                      | clear colorless fragment                                                                                                                                      |
| Crystal system                      | monoclinic                                                                                                                                                    | triclinic                                                                                                                                                     | monoclinic                                                                                                                                                    | triclinic                                                                                                                                                     |
| Space group                         | C 1 2/c 1                                                                                                                                                     | P -1                                                                                                                                                          | P 2 <sub>1</sub> /n                                                                                                                                           | P -1                                                                                                                                                          |
| Unit cell dimensions                | a = 21.5194(19) Å, α = 90°<br>b = 10.3978(9) Å, β = 91.393(3)°<br>c = 23.024(2) Å, γ = 90°                                                                    | a = 10.4102(19) Å, α = 81.153(7)°<br>b = 12.363(2) Å, β = 76.718(7)°<br>c = 21.101(4) Å, γ = 65.519(7)°                                                       | a = 10.1287(11) Å, α = 90°<br>b = 19.437(2) Å, β = 95.309(4)°<br>c = 16.5735(18) Å, γ = 90°                                                                   | a = 10.6636(5) Å, α = 80.983(2)°<br>b = 12.0948(6) Å, β = 83.783(2)°<br>c = 21.0683(11) Å, γ = 65.412(2)°                                                     |
| Volume                              | 5150.2(8) Å <sup>3</sup>                                                                                                                                      | 2400.2(8) Å <sup>3</sup>                                                                                                                                      | 3248.9(6) Å <sup>3</sup>                                                                                                                                      | 2437.5(2) Å <sup>3</sup>                                                                                                                                      |
| Z                                   | 8                                                                                                                                                             | 2                                                                                                                                                             | 4                                                                                                                                                             | 2                                                                                                                                                             |
| Density (calculated)                | 1.088 g/cm <sup>3</sup>                                                                                                                                       | 1.051 g/cm <sup>3</sup>                                                                                                                                       | 1.141 g/cm <sup>3</sup>                                                                                                                                       | 1.038 g/cm <sup>3</sup>                                                                                                                                       |
| Absorption coefficient              | 0.151 mm <sup>-1</sup>                                                                                                                                        | 0.156 mm <sup>-1</sup>                                                                                                                                        | 0.136 mm <sup>-1</sup>                                                                                                                                        | 0.153 mm <sup>-1</sup>                                                                                                                                        |
| F(000)                              | 1872                                                                                                                                                          | 840                                                                                                                                                           | 1216                                                                                                                                                          | 844                                                                                                                                                           |
| Diffractometer                      | Bruker D8 Venture Duo IMS                                                                                                                                     |
| Radiation source                    | IMS microsource, Mo                                                                                                                                           | IMS microsource, Mo                                                                                                                                           | IMS microsource, Mo                                                                                                                                           | IMS microsource, Mo                                                                                                                                           |
| Theta range for data collection     | 2.17 to 26.02°                                                                                                                                                | 2.21 to 25.35°                                                                                                                                                | 2.27 to 25.35                                                                                                                                                 | 1.96 to 25.35°                                                                                                                                                |
| Index ranges                        | -26<=h<=26<br>-12<=k<=12<br>-28<=l<=28                                                                                                                        | -12<=h<=12<br>-14<=k<=14<br>-25<=l<=25                                                                                                                        | -12<=h<=12<br>-23<=k<=23<br>-19<=l<=19                                                                                                                        | -12<=h<=12<br>-14<=k<=14<br>-25<=l<=25                                                                                                                        |
| Reflections collected               | 79283                                                                                                                                                         | 55819                                                                                                                                                         | 144772                                                                                                                                                        | 106589                                                                                                                                                        |
| Independent reflections             | 5073 [R(int) = 0.0311]                                                                                                                                        | 8777 [R(int) = 0.0309]                                                                                                                                        | 5953 [R(int) = 0.0606]                                                                                                                                        | 8902 [R(int) = 0.0274]                                                                                                                                        |
| Coverage of independent reflections | 100.0%                                                                                                                                                        | 99.9%                                                                                                                                                         | 99.9%                                                                                                                                                         | 99.7%                                                                                                                                                         |
| Absorption correction               | Multi-scan                                                                                                                                                    | Multi-Scan                                                                                                                                                    | Multi-scan                                                                                                                                                    | Multi-Scan                                                                                                                                                    |
| Max. and min. transmission          | 0.9770 and 0.9720                                                                                                                                             | 0.9610 and 0.9720                                                                                                                                             | 0.9870 and 0.9760                                                                                                                                             | 0.9600 and 0.9410                                                                                                                                             |
| Refinement method                   | Full-matrix least-squares on F <sup>2</sup>                                                                                                                   |
| Refinement program                  | SHELXL-2014/7 (Sheldrick, 2014)                                                                                                                               | SHELXL-2016/6 (Sheldrick, 2016)                                                                                                                               | SHELXL-2014/7 (Sheldrick, 2014)                                                                                                                               | SHELXL-2016/6 (Sheldrick, 2016)                                                                                                                               |
| Function minimized                  | Σ w(F <sub>o</sub> <sup>2</sup> - F <sub>c</sub> <sup>2</sup> ) <sup>2</sup>                                                                                  | Σ w(F <sub>o</sub> <sup>2</sup> - F <sub>c</sub> <sup>2</sup> ) <sup>2</sup>                                                                                  | Σ w(F <sub>o</sub> <sup>2</sup> - F <sub>c</sub> <sup>2</sup> ) <sup>2</sup>                                                                                  | Σ w(F <sub>o</sub> <sup>2</sup> - F <sub>c</sub> <sup>2</sup> ) <sup>2</sup>                                                                                  |
| Data / restraints / parameters      | 5073 / 0 / 268                                                                                                                                                | 8777 / 0 / 477                                                                                                                                                | 5953 / 0 / 365                                                                                                                                                | 8902 / 0 / 485                                                                                                                                                |
| Goodness-of-fit on F <sup>2</sup>   | 1.061                                                                                                                                                         | 1.040                                                                                                                                                         | 1.122                                                                                                                                                         | 1.046                                                                                                                                                         |
| Δ/σ <sub>max</sub>                  | 0.001                                                                                                                                                         | 0.001                                                                                                                                                         | 0.018                                                                                                                                                         | 0.001                                                                                                                                                         |
| Final R indices                     | 4598 data; I>2σ(I):<br>R1 = 0.0342, wR2 = 0.0834<br>all data:<br>R1 = 0.0388, wR2 = 0.0860                                                                    | 7672 data; I>2σ(I):<br>R1 = 0.0333, wR2 = 0.0820<br>all data:<br>R1 = 0.0403, wR2 = 0.0861                                                                    | 5470 data; I>2σ(I):<br>R1 = 0.0404, wR2 = 0.1000<br>all data:<br>R1 = 0.0447, wR2 = 0.1026                                                                    | 8372 data; I>2σ(I):<br>R1 = 0.0281, wR2 = 0.0694<br>all data:<br>R1 = 0.0302, wR2 = 0.0714                                                                    |
| Weighting scheme                    | w=1/[σ <sup>2</sup> (F <sub>o</sub> <sup>2</sup> )+(0.0348P) <sup>2</sup> +7.2742P]<br>where P=(F <sub>o</sub> <sup>2</sup> +2F <sub>c</sub> <sup>2</sup> )/3 | w=1/[σ <sup>2</sup> (F <sub>o</sub> <sup>2</sup> )+(0.0379P) <sup>2</sup> +1.3913P]<br>where P=(F <sub>o</sub> <sup>2</sup> +2F <sub>c</sub> <sup>2</sup> )/3 | w=1/[σ <sup>2</sup> (F <sub>o</sub> <sup>2</sup> )+(0.0446P) <sup>2</sup> +2.1762P]<br>where P=(F <sub>o</sub> <sup>2</sup> +2F <sub>c</sub> <sup>2</sup> )/3 | w=1/[σ <sup>2</sup> (F <sub>o</sub> <sup>2</sup> )+(0.0260P) <sup>2</sup> +1.2312P]<br>where P=(F <sub>o</sub> <sup>2</sup> +2F <sub>c</sub> <sup>2</sup> )/3 |
| Largest diff. peak and hole         | 0.456 and -0.374 eÅ <sup>-3</sup>                                                                                                                             | 0.615 and -0.295 eÅ <sup>-3</sup>                                                                                                                             | 0.359 and -0.346 eÅ <sup>-3</sup>                                                                                                                             | 0.305 and -0.200 eÅ <sup>-3</sup>                                                                                                                             |
| R.M.S. deviation from mean          | 0.044 eÅ <sup>-3</sup>                                                                                                                                        | 0.047 eÅ <sup>-3</sup>                                                                                                                                        | 0.044 eÅ <sup>-3</sup>                                                                                                                                        | 0.034 eÅ <sup>-3</sup>                                                                                                                                        |

**Table S4:** Crystal data and structural refinement parameters for compounds **5**, **8** and **9**.

| Compound #                          | 5                                                                                                                                                             | 8                                                                                                                                                             | 9                                                                                                                                                             |
|-------------------------------------|---------------------------------------------------------------------------------------------------------------------------------------------------------------|---------------------------------------------------------------------------------------------------------------------------------------------------------------|---------------------------------------------------------------------------------------------------------------------------------------------------------------|
| CCDC #                              | 2059207                                                                                                                                                       | 2059208                                                                                                                                                       | 2059209                                                                                                                                                       |
| Chemical formula                    | Si <sub>4</sub> C <sub>40</sub> H <sub>82</sub> N <sub>6</sub> O <sub>2</sub>                                                                                 | Si <sub>4</sub> C <sub>40</sub> H <sub>82</sub> N <sub>6</sub> P <sub>4</sub>                                                                                 | Si <sub>4</sub> C <sub>40</sub> H <sub>82</sub> N <sub>6</sub>                                                                                                |
| Formula weight                      | 791.47                                                                                                                                                        | 883.35                                                                                                                                                        | 759.47                                                                                                                                                        |
| Temperature                         | 100(2) K                                                                                                                                                      | 100(2) K                                                                                                                                                      | 100(2) K                                                                                                                                                      |
| Wavelength                          | 0.71073 Å                                                                                                                                                     | 0.71073 Å                                                                                                                                                     | 0.71073 Å                                                                                                                                                     |
| Crystal size                        | 0.169 × 0.201 × 0.294 mm                                                                                                                                      | 0.256 × 0.319 × 0.339 mm                                                                                                                                      | 0.157 × 0.279 × 0.296 mm                                                                                                                                      |
| Crystal habit                       | clear colorless fragment                                                                                                                                      | clear colorless fragment                                                                                                                                      | clear purple fragment                                                                                                                                         |
| Crystal system                      | triclinic                                                                                                                                                     | triclinic                                                                                                                                                     | triclinic                                                                                                                                                     |
| Space group                         | P -1                                                                                                                                                          | P -1                                                                                                                                                          | P -1                                                                                                                                                          |
| Unit cell dimensions                | a = 11.8823(10) Å, α = 103.907(3)°<br>b = 12.5801(10) Å, β = 97.451(3)°<br>c = 17.6952(13) Å, γ = 108.909(3)°                                                 | a = 10.0360(17) Å, α = 90.316(6)°<br>b = 11.430(2) Å, β = 100.375(6)°<br>c = 24.720(4) Å, γ = 115.781(5)°                                                     | a = 10.4607(14) Å, α = 87.804(6)°<br>b = 12.233(2) Å, β = 84.887(5)°<br>c = 20.302(3) Å, γ = 64.736(4)°                                                       |
| Volume                              | 2366.1(3) Å <sup>3</sup>                                                                                                                                      | 2500.4(8) Å <sup>3</sup>                                                                                                                                      | 2340.1(6) Å <sup>3</sup>                                                                                                                                      |
| Z                                   | 2                                                                                                                                                             | 2                                                                                                                                                             | 2                                                                                                                                                             |
| Density (calculated)                | 1.111 g/cm <sup>3</sup>                                                                                                                                       | 1.173 g/cm <sup>3</sup>                                                                                                                                       | 1.078 g/cm <sup>3</sup>                                                                                                                                       |
| Absorption coefficient              | 0.163 mm <sup>-1</sup>                                                                                                                                        | 0.281 mm <sup>-1</sup>                                                                                                                                        | 0.160 mm <sup>-1</sup>                                                                                                                                        |
| F(000)                              | 872                                                                                                                                                           | 960                                                                                                                                                           | 840                                                                                                                                                           |
| Diffractometer                      | Bruker D8 Venture                                                                                                                                             | Bruker D8 Venture Duo IMS                                                                                                                                     | Bruker D8 Venture Duo IMS                                                                                                                                     |
| Radiation source                    | TXS rotating anode, Mo                                                                                                                                        | IMS microsource, Mo                                                                                                                                           | IMS microsource, Mo                                                                                                                                           |
| Theta range for data collection     | 2.33 to 25.68°                                                                                                                                                | 2.28 to 25.68°                                                                                                                                                | 2.01 to 25.35                                                                                                                                                 |
| Index ranges                        | -14<=h<=14<br>-15<=k<=15<br>-21<=l<=21                                                                                                                        | -12<=h<=12<br>-13<=k<=13<br>-30<=l<=30                                                                                                                        | -12<=h<=12<br>-14<=k<=14<br>-24<=l<=24                                                                                                                        |
| Reflections collected               | 104064                                                                                                                                                        | 69988                                                                                                                                                         | 91859                                                                                                                                                         |
| Independent reflections             | 8998 [R(int) = 0.0373]                                                                                                                                        | 9439 [R(int) = 0.0232]                                                                                                                                        | 8579 [R(int) = 0.0507]                                                                                                                                        |
| Coverage of independent reflections | 99.9%                                                                                                                                                         | 99.6%                                                                                                                                                         | 99.9%                                                                                                                                                         |
| Absorption correction               | Multi-Scan                                                                                                                                                    | Multi-Scan                                                                                                                                                    | Multi-scan                                                                                                                                                    |
| Max. and min. transmission          | 0.9730 and 0.9610                                                                                                                                             | 0.9320 and 0.9110                                                                                                                                             | 0.9750 and 0.9540                                                                                                                                             |
| Refinement method                   | Full-matrix least-squares on F <sup>2</sup>                                                                                                                   | Full-matrix least-squares on F <sup>2</sup>                                                                                                                   | Full-matrix least-squares on F <sup>2</sup>                                                                                                                   |
| Refinement program                  | SHELXL-2016/6 (Sheldrick, 2016)                                                                                                                               | SHELXL-2016/6 (Sheldrick, 2016)                                                                                                                               | SHELXL-2016/6 (Sheldrick, 2016)                                                                                                                               |
| Function minimized                  | Σ w(F <sub>o</sub> <sup>2</sup> - F <sub>c</sub> <sup>2</sup> ) <sup>2</sup>                                                                                  | Σ w(F <sub>o</sub> <sup>2</sup> - F <sub>c</sub> <sup>2</sup> ) <sup>2</sup>                                                                                  | Σ w(F <sub>o</sub> <sup>2</sup> - F <sub>c</sub> <sup>2</sup> ) <sup>2</sup>                                                                                  |
| Data / restraints / parameters      | 8998 / 204 / 690                                                                                                                                              | 9439 / 0 / 513                                                                                                                                                | 8579 / 1033 / 887                                                                                                                                             |
| Goodness-of-fit on F <sup>2</sup>   | 1.040                                                                                                                                                         | 1.030                                                                                                                                                         | 1.035                                                                                                                                                         |
| Δ/σ <sub>max</sub>                  | 0.046                                                                                                                                                         | 0.002                                                                                                                                                         | 0.001                                                                                                                                                         |
| Final R indices                     | 8093 data; I>2σ(I):<br>R1 = 0.0320, wR2 = 0.0811<br>all data:<br>R1 = 0.0368, wR2 = 0.0843                                                                    | 8839 data; I>2σ(I):<br>R1 = 0.0245, wR2 = 0.0609<br>all data:<br>R1 = 0.0267, wR2 = 0.0626                                                                    | 7492 data; I>2σ(I):<br>R1 = 0.0583, wR2 = 0.1381<br>all data:<br>R1 = 0.0694, wR2 = 0.1499                                                                    |
| Weighting scheme                    | w=1/[σ <sup>2</sup> (F <sub>o</sub> <sup>2</sup> )+(0.0376P) <sup>2</sup> +1.5234P]<br>where P=(F <sub>o</sub> <sup>2</sup> +2F <sub>c</sub> <sup>2</sup> )/3 | w=1/[σ <sup>2</sup> (F <sub>o</sub> <sup>2</sup> )+(0.0251P) <sup>2</sup> +1.4676P]<br>where P=(F <sub>o</sub> <sup>2</sup> +2F <sub>c</sub> <sup>2</sup> )/3 | w=1/[σ <sup>2</sup> (F <sub>o</sub> <sup>2</sup> )+(0.0573P) <sup>2</sup> +2.3265P]<br>where P=(F <sub>o</sub> <sup>2</sup> +2F <sub>c</sub> <sup>2</sup> )/3 |
| Largest diff. peak and hole         | 0.457 and -0.314 eÅ <sup>-3</sup>                                                                                                                             | 0.335 and -0.266 eÅ <sup>-3</sup>                                                                                                                             | 0.316 and -0.318 eÅ <sup>-3</sup>                                                                                                                             |
| R.M.S. deviation from mean          | 0.046 eÅ <sup>-3</sup>                                                                                                                                        | 0.038 eÅ <sup>-3</sup>                                                                                                                                        | 0.049 eÅ <sup>-3</sup>                                                                                                                                        |

## 3 DFT Calculations

### 3.1 General Information

Geometry optimizations and harmonic frequency calculations were performed using *Gaussian16*<sup>S16</sup> at the B3LYP-D3/def2-SVP<sup>S17-22</sup> level of density functional theory (abbreviated B3LYP-D3 in the following). The “ultrafine” grid option was used for numerical integrations,<sup>S23</sup> as being standard in *Gaussian16 Rev. B.01*. Stationary points are characterized as minima by analysis of computed Hessians. The connectivity between minima and transition states was validated by IRC calculations<sup>S24</sup> or displacing the geometry along the transition mode, followed by unconstrained optimization. We chose this level of density functional theory based on the well correspondence of the SC-XRD and the calculated structures (see Table S5), whereas the M06-L and M06-2X functionals in combination with the 6-31+G(d,p) split valence basis set underestimate the Si=Si bond length during geometry optimization. To reference and improve the energy values obtained at the B3LYP-D3 level, we performed single point calculations with *ORCA 4.2.21*<sup>S25-26</sup> on the DLPNO-CCSD(T)<sup>S27-28</sup>/def2-TZVPP<sup>S22</sup> (NormalPNO, VeryTightSCF)(abbreviated DLPNO-CCSD(T) in the following) on the B3LYP-D3 optimized geometries, which gave a well correspondence (see Figure S59 and Figure S60). Energy decomposition analysis with natural orbitals for chemical valence (EDA-NOCV) was performed with *ADF 2019*,<sup>S29-30</sup> employing the B3LYP-D3/TZ2P level of theory (gas phase calculations, no frozen core, Becke grid of quality “good”) on B3LYP-D3 structures. To enable a comparisons between the base-stabilized disilenes published previously<sup>S31-32</sup> and **9**, bonding analysis was performed at the M06-2X/6-311++G(2d,2p)<sup>S33-35</sup> level of theory (abbreviated M06-2X in the following). The results obtained on the B3LYP-D3/def2-TZVP level of theory (usage of def2-SVP results in the appearance of non-nuclear attractors (NNA) along the Si=Si bond, as had been reported previously<sup>S36</sup>) correspond to the presented M06-2X ones. Natural Bond Orbital (NBO) and Natural Resonance Theory (NRT) analyses were performed using the *NBO 6.0* program<sup>S37-38</sup>, interfaced with *Gaussian16*<sup>S37-39</sup>. The AIMAll<sup>S40</sup> and multiwfn<sup>S41-42</sup> programs were used for QTAIM analyses.<sup>S43-44</sup> Results of TD-DFT calculations were obtained with *Gaussian16* at the B3LYP-D3/def2-TZVP(SMD:*n*-hexane)<sup>S45</sup> level of theory. Pictures of molecular structures were generated with the *ChemCraft*,<sup>S46</sup> *Cylview*,<sup>S47</sup> *Chimera*<sup>S48</sup> or *GaussView*<sup>S49</sup> programs. All molecular orbital surfaces are depicted with an isovalue of 0.05. If not stated otherwise, reported energy values correspond to the free energy values (T = 298.15 K, p = 1 atm).

### 3.2 Calculated Structures

#### Comparison of Calculated and Experimental Structures

**Table S5:** Comparison of selected bond lengths [Å] and angles [°] for the computed and experimental structures of **1-(E)**, **2-(Z)** and **9**. Geometries are calculated at the B3LYP-D3/def2-SVP level of theory. Experimental data are taken from SC-XRD analyses;  $\theta$  represents the bent angle,  $\tau$  the twist angle as defined in the main text.

| Compound      | Bond/Angle [Å/°]                  | Exp. [Å/°]          | Calc. [Å/°] | $\Delta(\text{Calc.}-\text{Exp.})$ [Å/°] |
|---------------|-----------------------------------|---------------------|-------------|------------------------------------------|
| <b>1-(E)*</b> | r(Si1=Si1')                       | 2.2534(7)           | 2.24        | 0.01                                     |
|               | r(Si1-N2)                         | 1.682(1)            | 1.71        | 0.03                                     |
|               | r(Si1-Si2)                        | 2.4142(6)           | 2.42        | 0.01                                     |
|               | r(N1-C1)                          | 1.285(2)            | 1.28        | 0.00                                     |
|               | a(N1-Si1-Si2)                     | 110.56(4)           | 111.1       | 0.5                                      |
|               | d(Si2-Si1=Si1'-Si2')              | -130.78(3)          | -129.3      | 1.5                                      |
|               | d(N1-Si1=Si1'-N1')                | -165.59(7)          | -163.8      | 1.8                                      |
|               | d(Si2-Si1=Si1'-N1')               | 31.82(6)            | 33.4        | 1.6                                      |
|               | $\theta$                          | 12.8                | 12.7        | 0.1                                      |
|               | $\tau$                            | 40.2                | 40.8        | 0.6                                      |
| <b>2-(Z)</b>  | r(Si1=Si2)                        | 2.2844(7)           | 2.28        | 0.00                                     |
|               | r(Si1/2-N1/4)                     | 1.683(1)/1.680(1)   | 1.70        | 0.02                                     |
|               | r(Si1/2-Si3/4)                    | 2.3922(7)/2.4001(7) | 2.41        | 0.02/0.01                                |
|               | r(N1/4-C1/21)                     | 1.283(2)/1.278(2)   | 1.28        | 0.00                                     |
|               | a(Si3/4-Si1/2-N1/4)               | 104.35(5)/103.84(5) | 104.6/104.6 | 0.3/0.8                                  |
|               | d(Si3-Si1=Si2-Si4)                | 83.24(3)            | 86.2        | 3.0                                      |
|               | d(N1-Si1=Si2-N4)                  | -14.32(8)           | -16.3       | 2.0                                      |
|               | d(Si3-Si1=Si2-N4)                 | -146.60(5)          | -145.1      | 1.5                                      |
|               | $\theta$                          | 36.3/34.7           | 38.3/38.3   | 2.0/3.6                                  |
|               | $\tau$                            | 25.5                | 23.3        | 2.2                                      |
| <b>9*2</b>    | r(Si1-Si2)                        | 2.219(4)            | 2.24        | 0.02                                     |
|               | r(Si1-N1/4)                       | 1.659(4)/1.604(4)   | 1.66        | 0.00/0.06                                |
|               | r(Si2-Si3/Si4)                    | 2.360(6)/2.343(5)   | 2.39/2.38   | 0.03/0.04                                |
|               | a(N1-Si1-N4)                      | 113.1(2)            | 110.1       | 3                                        |
|               | a(Si3-Si2-Si4)                    | 138.2(2)            | 132.7       | 5.5                                      |
|               | d(N1-Si1-Si2-Si3)                 | 152.1(2)            | 161.1       | 9                                        |
|               | d(N1-Si1-Si2-Si4)                 | -55.6(3)            | -51.6       | 4                                        |
|               | d(N4-Si1-Si2-Si4)                 | 135.3(3)            | 142.6       | 7.3                                      |
|               | $\theta(\text{Silyl}/\text{NHI})$ | 40.3/8.1            | 41.8/10.2   | 1.5/2.1                                  |
|               | $\tau$                            | 46.9                | 42.4        | 4.5                                      |

\*the calculated structure has one negative frequency in line with thermal ellipsoids oriented out of plane

\*2as the SC-XRD structure of **9** revealed different isomers concerning the orientation of the methyl group in Si<sup>t</sup>Bu<sub>2</sub>Me, only Part A is compared here; see the next page for the other isomers and corresponding discussion.



## Calculated isomers for **9**

**Table S6:** Different calculated isomers of **9** including their structural metrics.

| Compound                                                               | <b>9</b>                                                                          | <b>9<sup>I2</sup></b>                                                             | <b>9<sup>I3</sup></b>                                                              | <b>9<sup>I4</sup></b>                                                               |
|------------------------------------------------------------------------|-----------------------------------------------------------------------------------|-----------------------------------------------------------------------------------|------------------------------------------------------------------------------------|-------------------------------------------------------------------------------------|
| Corresponding to XRD part                                              | A                                                                                 | B                                                                                 | C                                                                                  | –                                                                                   |
| Molecular structure ( <sup>t</sup> Bu groups depicted as wireframes)   | 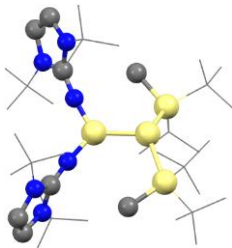 |  |  |  |
| $\Delta G_{rel}^*$                                                     | 0.0                                                                               | +2.4                                                                              | +1.3                                                                               | +3.9                                                                                |
| Bond length [Å], angles [°] and dihedrals [°] of the different isomers |                                                                                   |                                                                                   |                                                                                    |                                                                                     |
| r(Si1–Si2)                                                             | 2.24                                                                              | 2.26                                                                              | 2.23                                                                               | 2.26                                                                                |
| r(Si1–N1/4)                                                            | 1.66                                                                              | 1.67                                                                              | 1.67                                                                               | 1.67                                                                                |
| r(Si2–Si3/Si4)                                                         | 2.39/2.38                                                                         | 2.38/2.40                                                                         | 2.37                                                                               | 2.37/2.39                                                                           |
| a(N1–Si1–N4)                                                           | 110.1                                                                             | 111.3                                                                             | 110.9                                                                              | 110.6                                                                               |
| a(Si3–Si2–Si4)                                                         | 132.7                                                                             | 123.6                                                                             | 126.0                                                                              | 119.4                                                                               |
| d(N1–Si1–Si2–Si3)                                                      | 161.1                                                                             | 131.3                                                                             | 155.6                                                                              | 147.2                                                                               |
| d(N1–Si1–Si2–Si4)                                                      | -51.6                                                                             | -6.5                                                                              | -54.9                                                                              | -69.3                                                                               |
| d(N4–Si1–Si2–Si4)                                                      | 142.6                                                                             | 160.7                                                                             | 136.6                                                                              | 125.6                                                                               |
| $\theta$ (Silyl/NH)                                                    | 41.8/10.2                                                                         | 44.2/9.3                                                                          | 31.6/8.3                                                                           | 34.2/10.7                                                                           |
| $\tau$                                                                 | 42.4                                                                              | 52.7                                                                              | 44.2                                                                               | 49.1                                                                                |

\* obtained at the DLPNO-CCSD(T)/def2-TZVPP//B3LYP-D3/def2-SVP level of theory, referenced to **9**

Note: the calculated Isomers **9<sup>I2</sup>** and **9<sup>I3</sup>** show some deviation from XRD parts B and C (*trans*-bent angle), which can be compensated using a different level of theory (PBEh-3c).

The results of PBEh-3c optimized structures coincide with the presented ones.

The disordered SC-XRD structure of **9** hinted towards different accessible isomers, which differ in the orientation of the methyl groups. Calculations on all parts contained in the XRD structure revealed Part A lowest in energy and the isomers **9<sup>I2</sup>** and **9<sup>I3</sup>**(Table S6), which are close in energy. Another possible isomer with both methyl groups pointing away from the central Si–Si bond **9<sup>I4</sup>** is raised in energy. To not overcomplicate the discussion in the manuscript, only **9**, the isomer lowest in energy, is discussed there. The calculated absorption band of **9** at 463 nm (see Table S7, next page) is decreased in comparison to the experimental value (490 nm, see Figure S44). We anticipate the connection to the different possible isomers, which agrees with the slight red shift of the HOMO→LUMO transition for the isomer **9<sup>I2</sup>** (496 nm) and **9<sup>I3</sup>** (511 nm)(Table S7). Interestingly, the calculated absorption band for **9<sup>I4</sup>** (561 nm) (the isomer not present in the SC-XRD data) exhibits a significant red shift of the HOMO→LUMO transition, which renders this configuration unlikely to be present.

### 3.3 TD-DFT calculations

#### Calculated UV-vis absorption bands for 2-(Z), 2-(E) and 9

**Table S7:** Calculated transitions and UV-vis absorption bands using TD-DFT in Gaussian16 at the B3LYP-D3/def2-TZVP(SMD:n-hexane) level of theory for 2-(Z), 2-(E) and 9 (including isomers 9<sup>12</sup>/9<sup>13</sup>/9<sup>14</sup>).

| Compound        | Wavelength [nm] | MO contributions | f             | Contribution |
|-----------------|-----------------|------------------|---------------|--------------|
| 2-(Z)           | 516             | HOMO→LUMO        | 0.1907        | 92.0%        |
|                 |                 | HOMO→LUMO+1      |               | 7.0%         |
|                 | 438             | HOMO-1→LUMO      | 0.0100        | 99.2%        |
|                 | 432             | HOMO→LUMO        | 0.0689        | 6.6%         |
|                 |                 | HOMO→LUMO+1      |               | 90.1%        |
| 372             | HOMO-2→LUMO     | 0.0444           | 97.4%         |              |
| 355             | HOMO→LUMO+3     | 0.0101           | 96.3%         |              |
| 2-(E)           | 492             | HOMO→LUMO        | 0.2571        | 98.5%        |
|                 | 422             | HOMO→LUMO+1      | 0.0000        | 95.4%        |
|                 | 417             | HOMO-1→LUMO      | 0.0000        | 98.0%        |
|                 | 374             | HOMO-1→LUMO+2    | 0.0000        | 98.1%        |
|                 | 336             | HOMO-2→LUMO      | 0.0207        | 91.8%        |
| HOMO→LUMO+3     |                 | 4.9%             |               |              |
| 9               | 463             | HOMO→LUMO        | 0.0868        | 96.4%        |
|                 |                 | HOMO→LUMO+1      |               | 51.8%        |
|                 |                 | HOMO→LUMO+2      |               | 35.1%        |
|                 | 362             | HOMO→LUMO+6      | 0.0226        | 8.1%         |
|                 |                 | HOMO→LUMO+1      |               | 39.0%        |
|                 |                 | HOMO→LUMO+2      |               | 32.1%        |
|                 |                 | HOMO→LUMO+5      |               | 9.5%         |
| 331             | HOMO→LUMO+6     | 0.0155           | 8.3%          |              |
|                 | HOMO→LUMO+10    |                  | 7.4%          |              |
| 9 <sup>12</sup> | 496             | HOMO→LUMO        | 0.0806        | 97.5%        |
| 9 <sup>13</sup> | 511             | HOMO→LUMO        | 0.0711        | 97.3%        |
| 9 <sup>14</sup> | 561             | HOMO→LUMO        | 0.0542        | 98.0%        |
| 1/1'            | 682/661         | HOMO→LUMO        | 0.0775/0.0971 | 95.0%/95.8%  |
|                 |                 | HOMO→LUMO+2      |               | 3.9%/3.7%    |

## Orbitals involved in UV-vis transitions of 2-(Z), 2-(E) and 9

### 2-(Z):

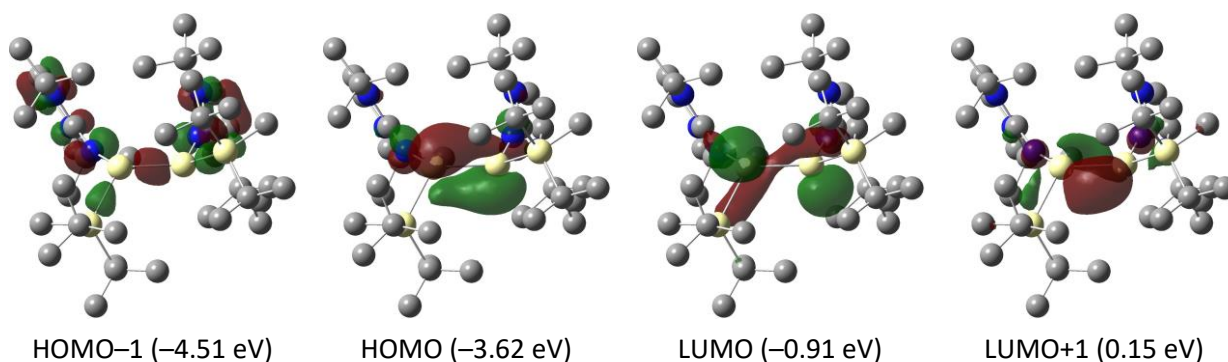

Figure S52: Molecular orbitals of 2-(Z), obtained at the B3LYP-D3/def2-TZVP(SMD:n-hexane) level, isovalue 0.05.

### 2-(E):

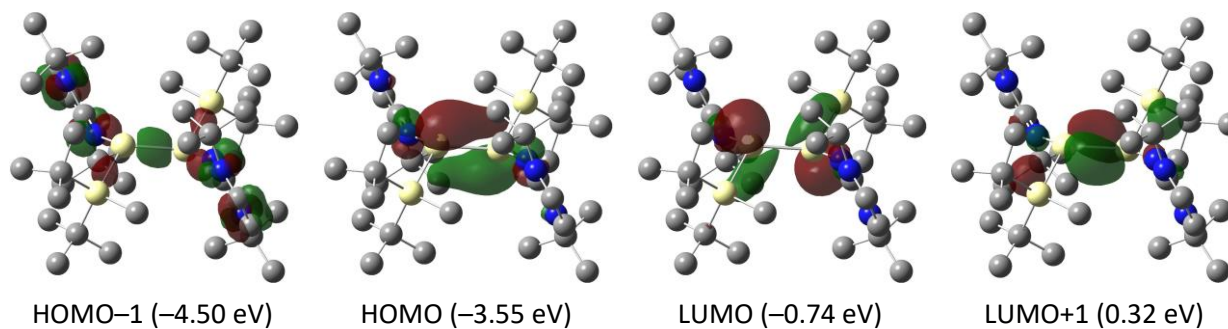

Figure S53: Molecular orbitals of 2-(E), obtained at the B3LYP-D3/def2-TZVP(SMD:n-hexane) level, isovalue 0.05.

### 9:

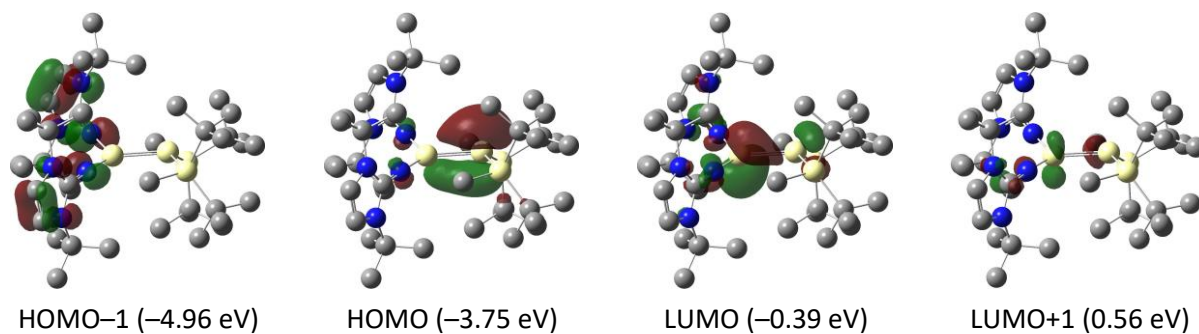

Figure S54: Molecular orbitals of 9, obtained at the B3LYP-D3/def2-TZVP(SMD:n-hexane) level, isovalue 0.05.

**9<sup>12</sup>:**

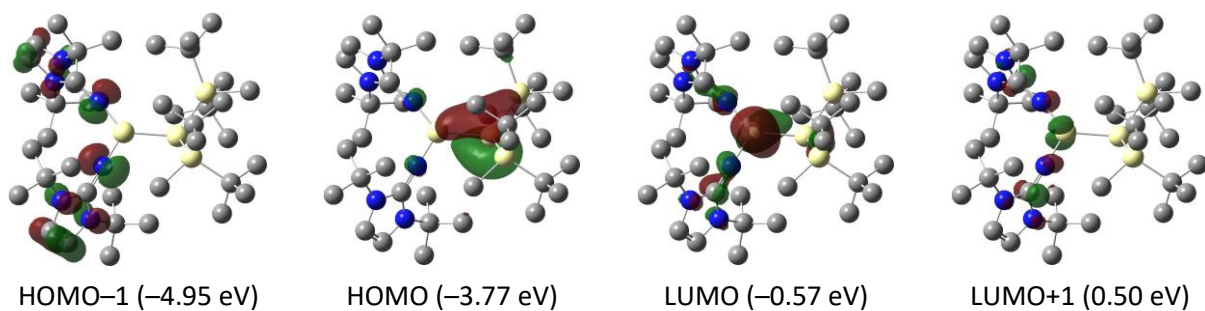

**Figure S55:** Molecular orbitals of **9<sup>12</sup>**, obtained at the B3LYP-D3/def2-TZVP(SMD:n-hexane) level, isovalue 0.05.

**9<sup>13</sup>:**

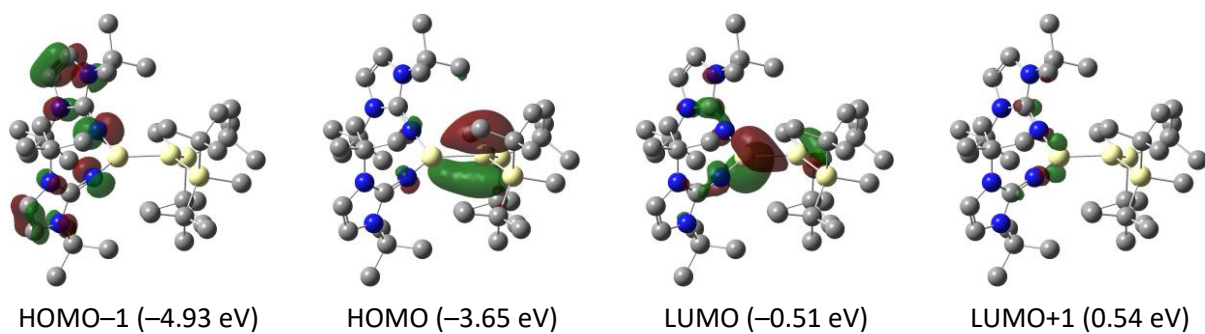

**Figure S56:** Molecular orbitals of **9<sup>13</sup>**, obtained at the B3LYP-D3/def2-TZVP(SMD:n-hexane) level, isovalue 0.05.

**9<sup>14</sup>:**

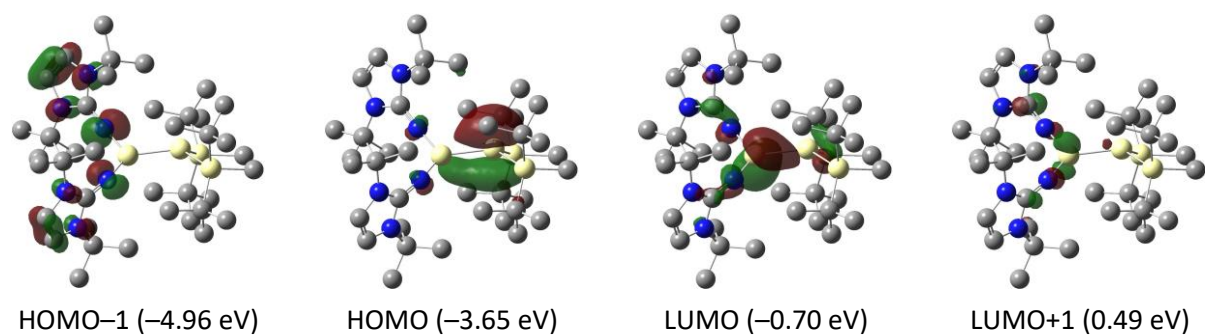

**Figure S57:** Molecular orbitals of **9<sup>14</sup>**, obtained at the B3LYP-D3/def2-TZVP(SMD:n-hexane) level, isovalue 0.05.

### 3.4 Mechanistic investigations for the 2-(Z)/2-(E) interconversion

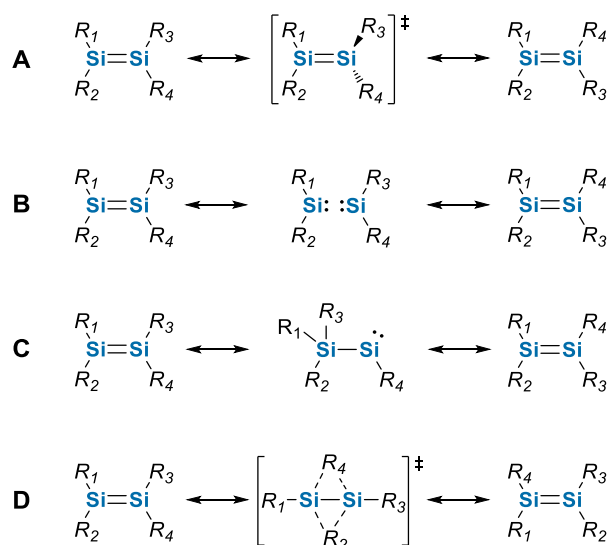

Figure S58: Possible isomerization pathways for Disilenes.

Pathway A:

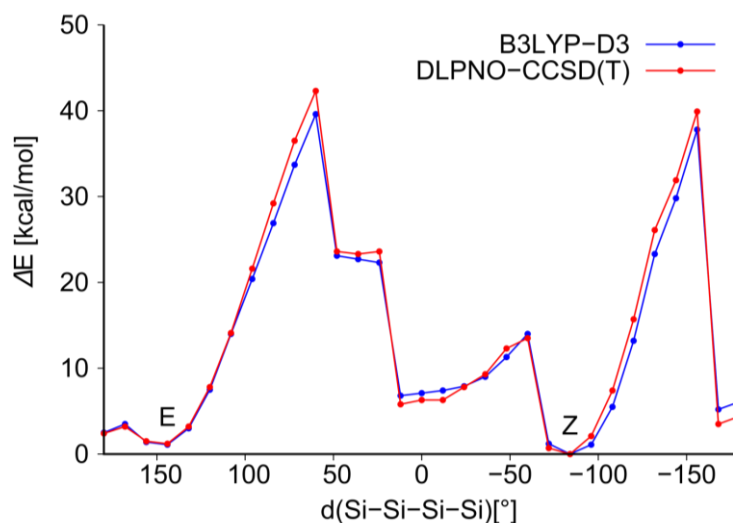

Figure S59: Relaxed PES Scan around the dihedral angle (Si3-Si1-Si2-Si4) of **2** with marked E/Z isomer.

Pathway B:

Table S8: Monomerization energies obtained at the DLPNO-CCSD(T)/def2-TZVP//B3LYP-D3/def2-SVP level of theory; \* **1-(E)'**: optimized structure without imaginary frequency.

| Compound           | $\Delta G_{298}$ [kcal/mol] |
|--------------------|-----------------------------|
| <b>2-(Z)/2-(E)</b> | 22.5                        |
| <b>VI</b>          | 7.9                         |
| <b>1-(E)'</b> *    | 8.8                         |

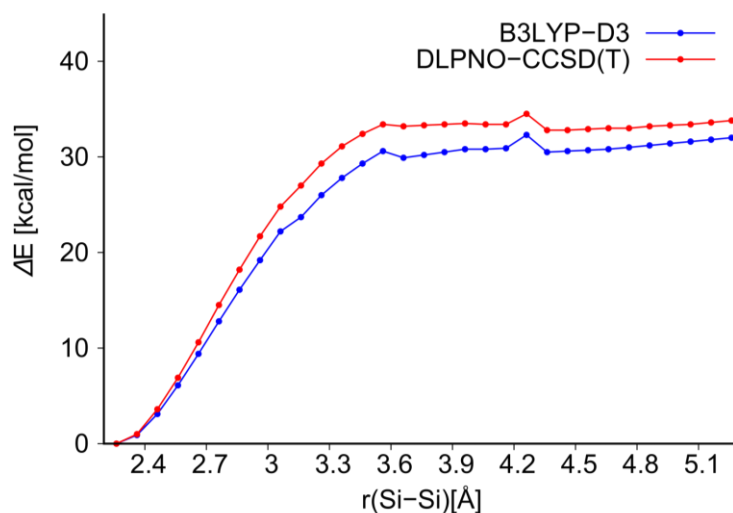

**Figure S60:** Relaxed PES-scan along the central Si1–Si2 bond.

**Pathway C:**

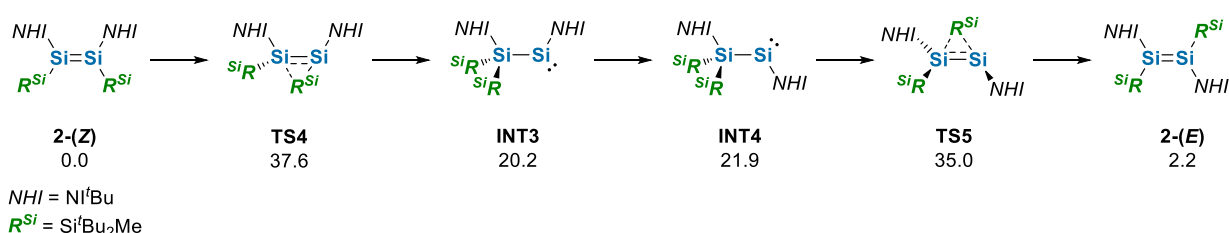

**Figure S61:** Computed reaction pathway for the interconversion of **2-(Z)**/**2-(E)** via silyl-silylenes **INT3**/**INT4**.

**Pathway D:**

We have investigated the mechanistic route for the concerted dyotropic rearrangement (pathway **D**) as it had been concluded for aryl-substituted disilenes,<sup>S50</sup> but we couldn't determine a suitable transition state accessible in energy. We attribute this to the steric demand of the ligands as the *tert*-butyl groups of the imino and the silyl ligands do not allow to access the spatial arrangement for a concerted transition state in pathway **D**.

Energy difference between *Z/E* isomer for the different disilenes:

**Table S9:** Energy differences between the *Z/E* isomers for the different disilenes (**1**, **2** and **VI**) and resulting ratio at room temperature, obtained at the DLPNO-CCSD(T)/def2-TZVPP//B3LYP-D3/def2-SVP level of theory

| Compound   | $\Delta G_{298}$ [kcal/mol] | Z [%] | E [%] |
|------------|-----------------------------|-------|-------|
| <b>1</b>   | -3.7                        | 0.2   | 99.8  |
| <b>2</b>   | +2.2                        | 97.7  | 2.3   |
| <b>VI*</b> | +1.8*                       | 95.3* | 4.7*  |

\*the DLPNO-CCSD(T)/def2-TZVPP//B3LYP-D3/def2-SVP level of theory does not coincide with the experimental und theoretical results reported for **VI** previously<sup>S3</sup>

### 3.5 EDA of 2-(Z) and 2-(E)

We chose to perform the EDA-NOVC of the disilenes with respect to the singlet fragments.<sup>S51-53</sup> We note, however, that the fragmentation into the respective triplet silylenes yields less negative  $\Delta E_{\text{orb}}$  contributions, which is recommended by Zhao *et al.*,<sup>S54</sup> but results in a much higher preparation energy.

Factors contributing to the relative stability of **2-(Z)** (Table S10):

- The steric energy (sum of Pauli repulsion and electrostatic attraction) is lower for **2-(Z)**
- The dispersion interaction for **2-(Z)** is roughly 3 kcal/mol higher.
- The orbital interaction (mainly the first deformation density, see Figure S62) is higher in **2-(E)**, presumably due to the absence of twisting and a shortened bond length in comparison to **2-(Z)**.
- The interaction energy of **2-(E)** is slightly higher, but a significantly lower preparation energy (solely connected to geometry, as the fragments are already in their “relaxed” electronic singlet configuration) leads to an overall higher dissociation energy of **2-(Z)**.
- The geometric preparation energy is directly linked to the interligand angle ( $\angle(\text{Si}^{\text{Silyl}}-\text{Si}^{\text{central}}-\text{N}^{\text{NHl}})$ ): **2-(E)** (112.5 °) > **2-(Z)** (104.6 °) > monomer **2<sup>M</sup>** (99.1 °). The free silylenes need less geometric distortion to form the Z isomer, which lowers its relative energy compared to E

**Table S10:** Energy decomposition analysis of disilenes **2-(E)** and **2-(Z)**, energies in kcal/mol

| Energy [kcal/mol]          | <b>2-(E)</b> | <b>2-(Z)</b> |
|----------------------------|--------------|--------------|
| $\Delta E_{\text{Pauli}}$  | 299.8        | 286.7        |
| $\Delta E_{\text{elstat}}$ | -171.4       | -161.0       |
| $\Delta E_{\text{steric}}$ | 128.4        | 125.6        |
| $\Delta E_{\text{orb}}$    | -155.5       | -148.1       |
| $\Delta E_{\text{disp}}$   | -26.2        | -29.0        |
| $\Delta E_{\text{int}}$    | -53.3        | -51.5        |
| $\Delta E_{\text{prep}}$   | 15.4         | 9.4          |
| $D_e$                      | 37.9         | 42.1         |

The two respective NOCV deformation densities with the highest NOCV eigenvalues are shown in Figure S62 and Figure S63. They are qualitatively equivalent for disilenes **2-(E)** and **2-(Z)**. The first deformation density  $\Delta\rho_1$  shows the mutual donation from the sp-type lone pairs into the opposite p-type acceptor orbitals ( $\pi$ -type). The second deformation density  $\Delta\rho_2$  shows further accumulation of  $\sigma$ -type charge density between the silicon centers.

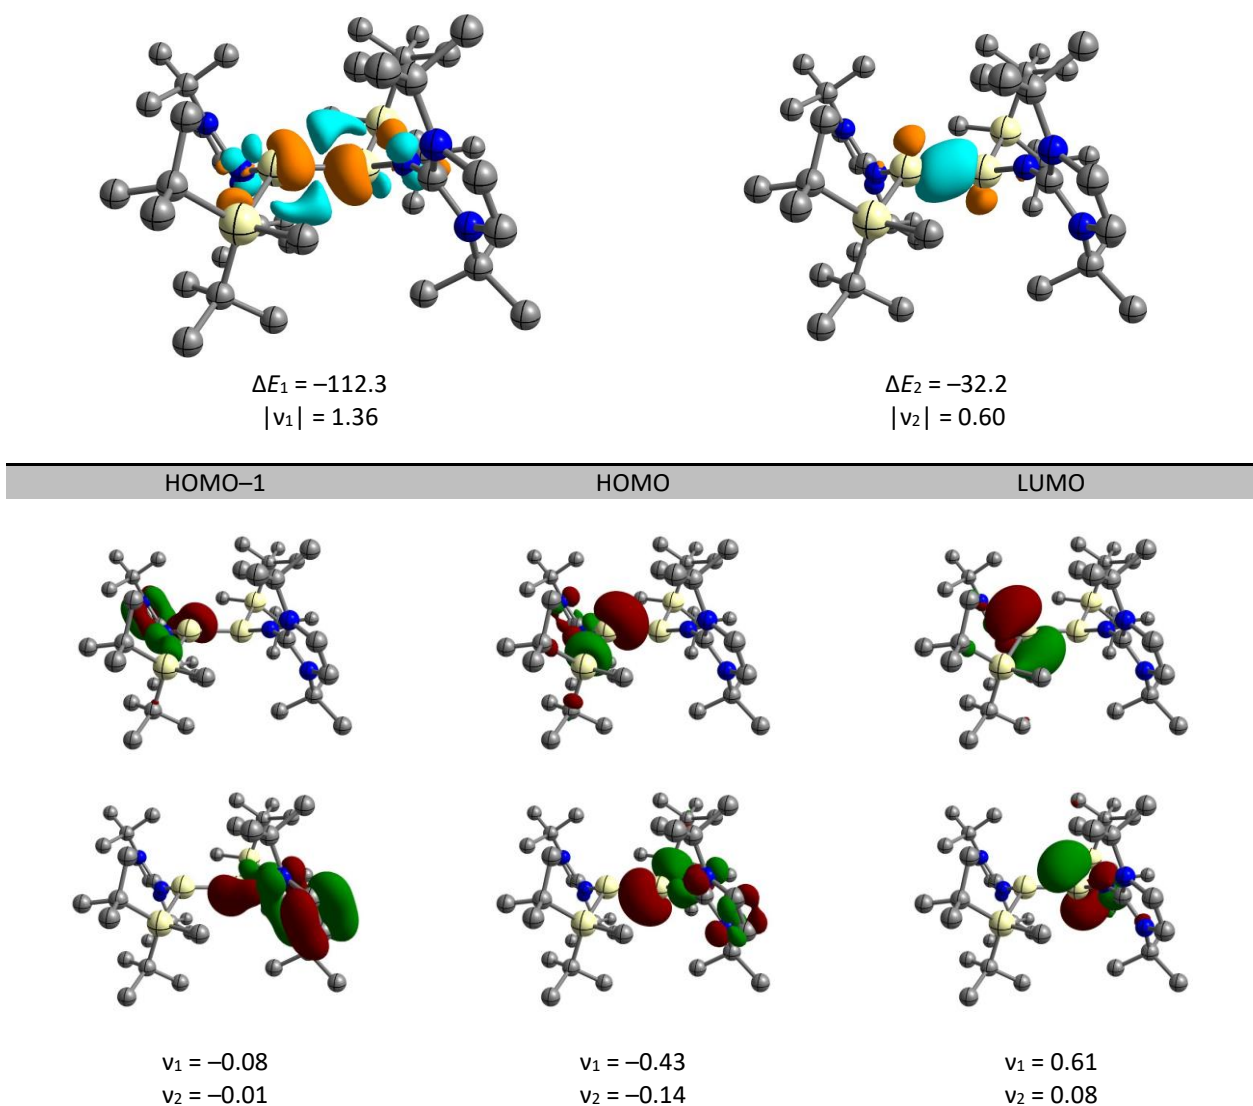

**Figure S62:** First (left) and second (right) deformation densities of disilene **2-(E)**; charge depletion in orange, charge accumulation in light blue; orbital interaction energies  $\Delta E$  in kcal/mol and charge eigenvalues  $v$  as quantification for the charge transfer between donor (negative values) and acceptor (positive numbers) fragments (in e) for the involved fragment orbitals; isovalue =  $0.005 a_0^{-3}$ .



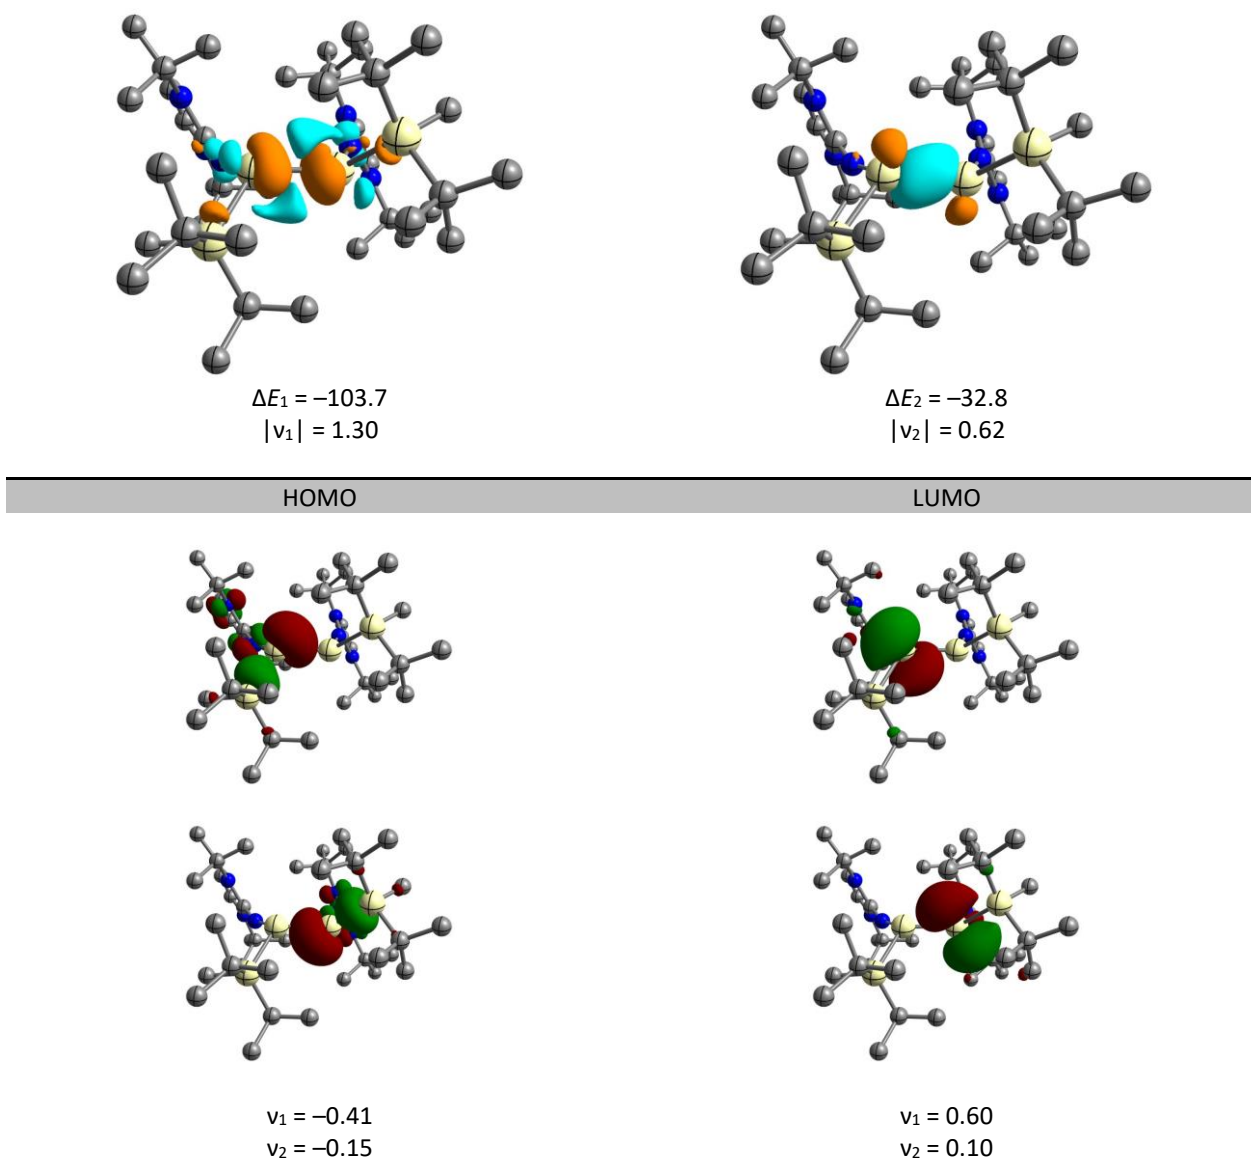

**Figure S63:** First (left) and second (right) deformation densities of disilene **2-(Z)**; charge depletion in orange, charge accumulation in light blue; orbital interaction energies  $\Delta E$  in kcal/mol and charge eigenvalues  $v$  as quantification for the charge transfer between donor (negative values) and acceptor (positive numbers) fragments (in e) for the involved fragment orbitals; isovalue =  $0.005 a_0^{-3}$ .

### 3.6 LED of **2-(Z)** and **2-(E)**

To investigate the differences of the dispersion interaction for **2-(Z)/2-(E)** in more detail, we performed Local Energy Decomposition (LED)<sup>S55</sup> analysis on the DLPNO-CCSD(T)/def2-TZVPP (RIJCOSX with GridX4,<sup>S56</sup> NormalPNO, VeryTightSCF) level of theory with respect to two interacting silylene fragments. Since this fragmentation scheme cuts through a covalent (double) bond, the Foster-Boys orbitals corresponding to the central Si=Si double bond have similar populations on both fragments.<sup>S57</sup> This results in an arbitrary assignment of the electrons to either one of the fragments leading to large electrostatic and exchange interactions. The LED dispersion energy can, however, be corrected according to Lu, Neese and Bistoni:<sup>S58</sup> We deleted the inter-fragment strong pair dispersive contributions (dipol-dipol & cross excitations) involving the critical PNOs of the central Si=Si double bond. This resulted in an almost similar reduction of the computed dispersion energy by 13.5 kcal/mol and 13.8 kcal/mol for **2-(E)** and **2-(Z)**, respectively. The corrected LED dispersion energies align well with the dispersion energy obtained by Grimme's empirical D3 model within the EDA-NOCV at the B3LYP-D3/TZ2P//B3LYP-D3/def2-SVP level of theory (Table S11).

**Table S11:** Comparison of the dispersion energies obtained from EDA and LED.

| $\Delta E_{\text{disp}}$ [kcal/mol] | <b>2-(E)</b> | <b>2-(Z)</b> |
|-------------------------------------|--------------|--------------|
| Grimme's D3 model                   | 26.2         | 29.0         |
| LED corrected                       | 25.9         | 28.9         |
| LED uncorrected                     | 39.4         | 42.7         |

A recent contribution by Mata and Wuttke<sup>S59</sup> offers the possibility to evaluate the dispersion interactions obtained within LED analysis in a more intuitive way: a graphical representation of the dispersion interaction density (DID). The DID is mapped onto the isosurface of molecular electron density and hence gives a more intuitive visualization of London dispersion interactions. The graphical results for the dispersion interaction density of **2-(Z)** and **2-(E)** are given in Figure S64, where increased interaction is connected with red coloring and zero interaction represented in blue. As results of the Me group of Si<sup>t</sup>Bu<sub>2</sub>Me pointing towards the double bond, the dispersion interaction in **2-(E)** is dominated by interactions between the Me groups of the silyl ligand and the <sup>t</sup>Bu groups of the NHI ligand. Interaction between the <sup>t</sup>Bu groups of the NHI and the silyl group is less pronounced due to increased spatial distance. By contrast, the Me groups in **2-(Z)** point away from the Si=Si bond, which yields a spatial approach of the <sup>t</sup>Bu of NHI and silyl group. This yields an increased dispersion interaction between the <sup>t</sup>Bu groups of the NHI and the silyl groups of both silylene fragments in comparison to **2-(E)**.

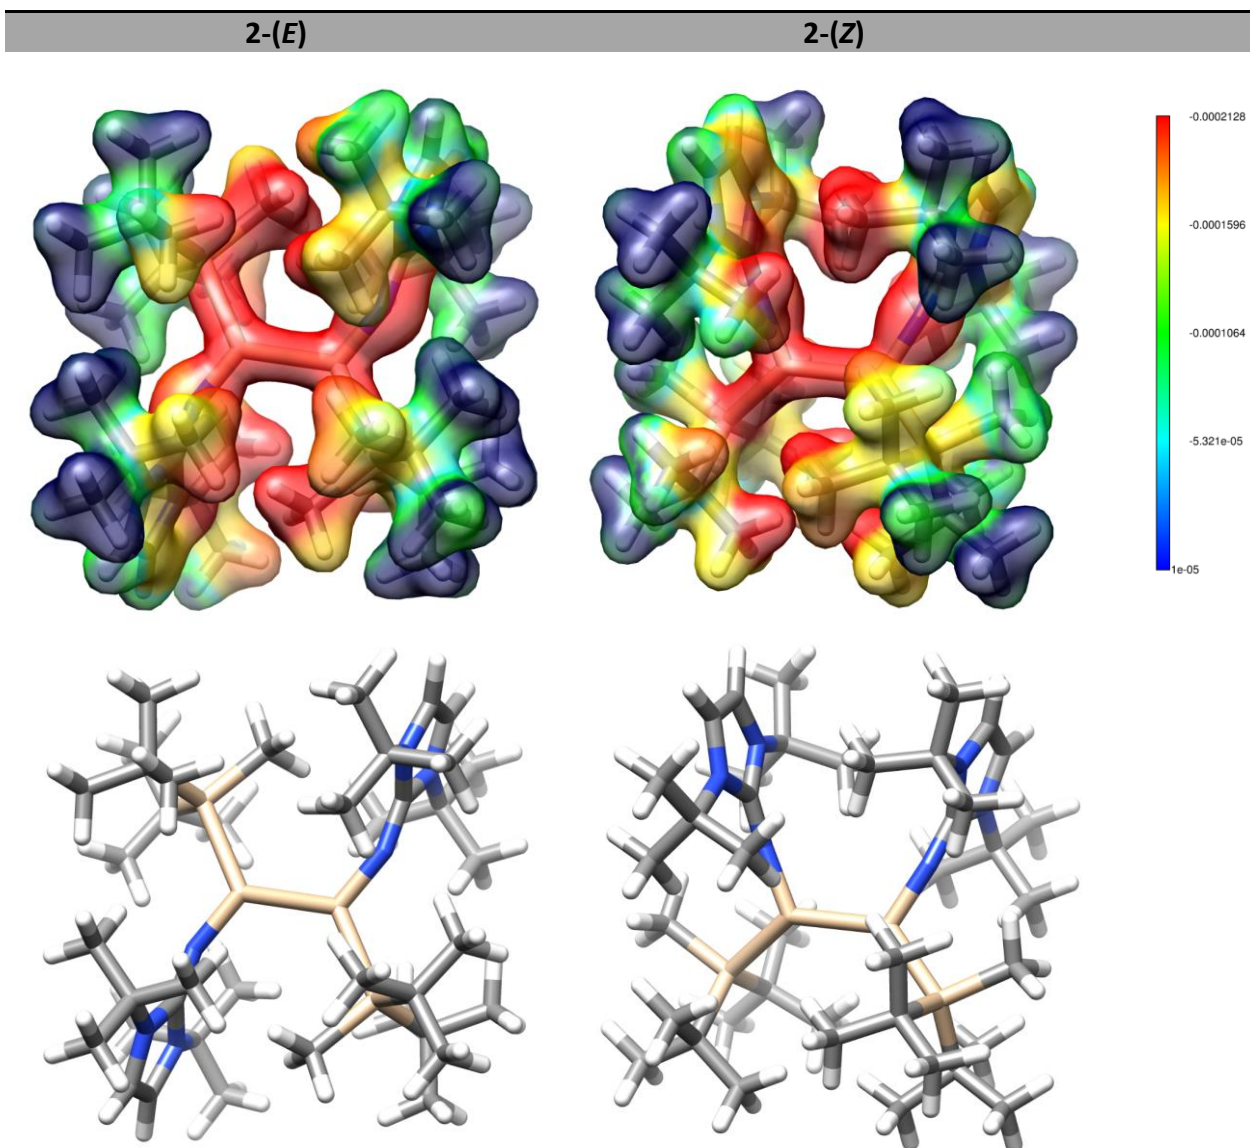

**Figure S64:** Projected DID plots (top) considering the monomeric silylenes as the interacting fragments and molecular structure in same orientation (bottom) for **2-(Z)/(E)**. Molecular density isosurfaces were generated at an isovalue of 0.05. DID color scheme ranges from highest value (red) to zero interaction energy (blue).

Note: As stated above LED analysis utilizes the Foster-Boys localization method. This is problematic in the case of two interaction silylene fragments as the electrons in the Foster-Boys orbitals for the Si–Si bond are assigned rather randomly to silylene fragment 1 or 2. This can be corrected for the dispersion energy term according to Lu, Neese and Bistoni<sup>S58</sup> but it is not possible for the projected DID plots. As a direct result, the central Si=Si bond is marked red in Figure S64. However, this is the case in a comparable manner for both isomers of disilene **2**, hence evaluation of the projected DID plots is possible on a comparative scale for the interaction between the two fragments beside the central Si=Si bond.

### 3.7 H<sub>2</sub> activation

We further investigated the H<sub>2</sub> activation by disilene **2-(Z)**. The results are summarized in Figure S65. In line with the previous report for H<sub>2</sub> activation by disilene **VI**,<sup>53</sup> the energetically preferred pathway proceeds via a concerted transition state at the disilene via **TS2H<sub>2</sub>** with the lowest barrier of 24.8 kcal/mol. Reaction of the monomeric silylene in **TS2<sup>M</sup>H<sub>2</sub>** or **TS2<sup>M</sup>H<sub>2</sub>'** is disfavored, which is in line with a reported experiment: addition of <sup>t</sup>Bu<sub>2</sub>SiSiH<sub>2</sub> to disilene **VI** did not show any reaction.<sup>53</sup> Hence, the pathway via **TSINT2<sup>M</sup>** can be excluded. Moreover, the formation of a silyl-silylene via NHI or silyl migration is connected with a barrier of 37.6/34.7 kcal/mol (Figure S61, Figure S69 and Figure S70). Hence, H<sub>2</sub> activation via a silyl-silylene can be excluded based on the results for the isomerization reactions.

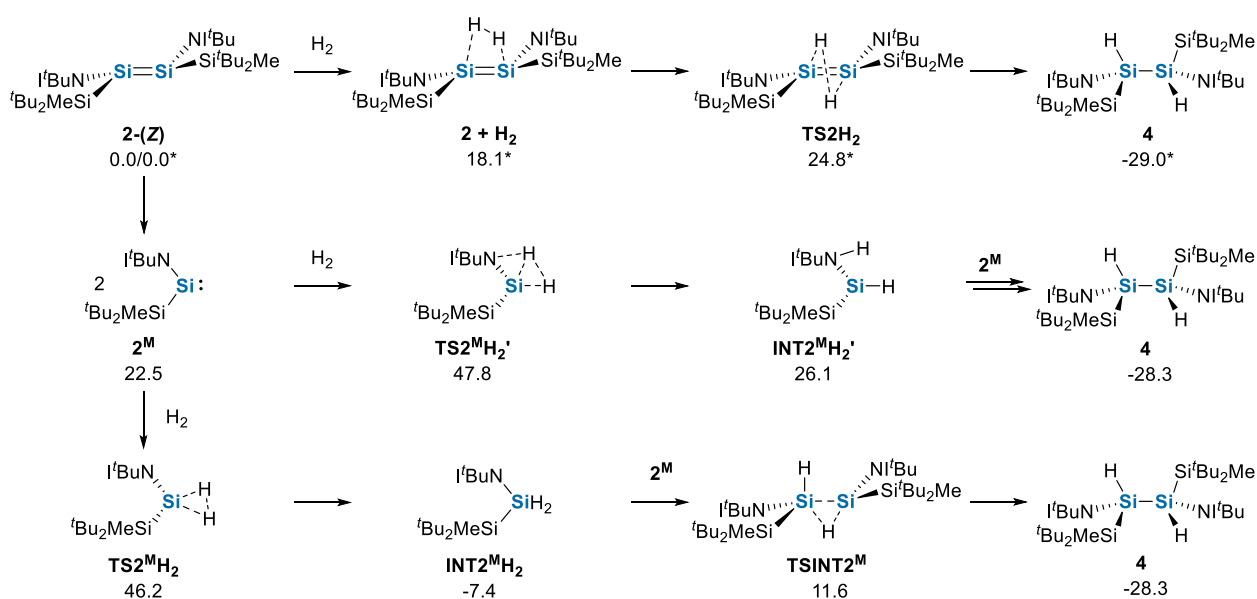

**Figure S65:** Calculated pathways for the H<sub>2</sub> activation by **2-(Z)**, energy values in kcal/mol. Unfortunately, we were not able to detect the transition state **TS2H<sub>2</sub>** at the B3LYP-D3/ def2-SVP level of theory. However, the transition state was found using the PBEh-3c<sup>S60</sup> level of theory. Energy values marked with \* were obtained at the DLPNO-CCSD(T)/def2-TZVPP//PBEh-3c level of theory.

Further interested in the orbital interactions involved in **TS2H<sub>2</sub>**, we performed NBO calculations at the M06-2X/6-311++G(2d,2p) level of theory (Figure S66). Accordingly, the dominant interactions are  $\pi(\text{Si}1-\text{Si}2)$  to  $\sigma^*(\text{H}-\text{H})$  and  $\sigma(\text{H}-\text{H})$  to  $\pi^*(\text{Si}1-\text{Si}2)$  electron donations. However, there is a significant contribution of electron donation from  $\sigma(\text{H}-\text{H})$  to  $\sigma^*(\text{Si}1/2-\text{N}1/\text{N}4)$ . As those interactions are present on both sides of the disilene, the H-H bond is not polarized according to NPA.

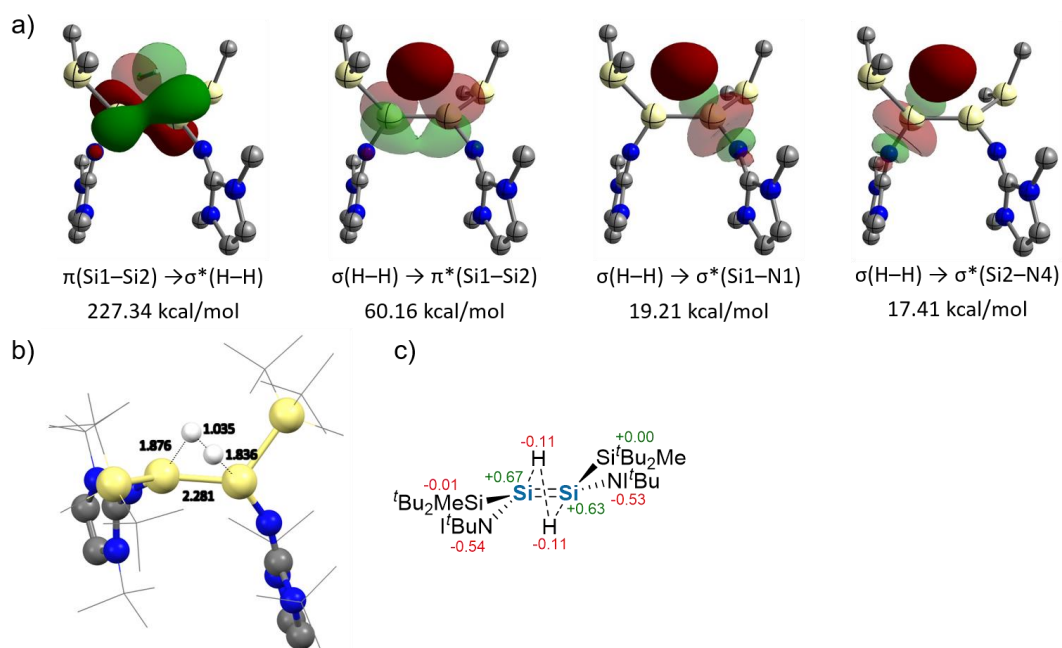

**Figure S66:** Selected results of the NBO analysis of **TS2H<sub>2</sub>** at the M06-2X/6-311++G(2d,2p) level of theory. (a) dominant NBO interactions (occupied NBOs solid, vacant NBOs faded) and corresponding perturbative interaction energies, (b) molecular connectivity and (c) NPA group charges (red negative, green positive).

### 3.8 Radical cation 7

#### Calculated structure of 2-(E)

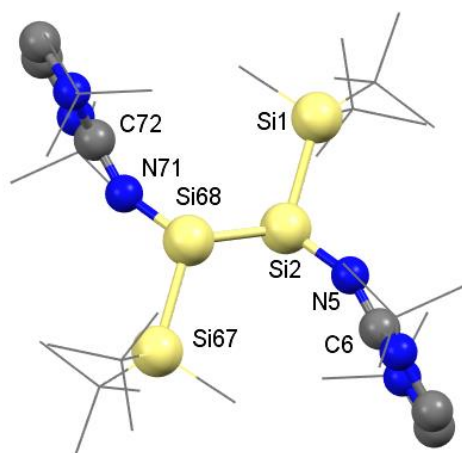

| Bond/Angle                      | Calc. [ $\text{\AA}/^\circ$ ] |
|---------------------------------|-------------------------------|
| $r(\text{Si2-Si68})$            | 2.26                          |
| $r(\text{Si2/69-N5/71})$        | 1.70                          |
| $r(\text{Si2/68-Si1/67})$       | 2.39                          |
| $r(\text{N5/71-C6/72})$         | 1.28                          |
| $a(\text{N5/71-Si2/68-Si1/67})$ | 112.5                         |
| $d(\text{Si1-Si2-Si68-Si67})$   | 180.0                         |
| $d(\text{Si1-Si2-Si68-N71})$    | 42.2                          |
| $\theta$                        | 35.2                          |
| $\tau$                          | 0.0                           |

**Figure S67:** Calculated structure of **2-(E)** including selected bond length and angles; obtained at the B3LYP-D3/def2-SVP level of theory.

#### Radical Cation 7

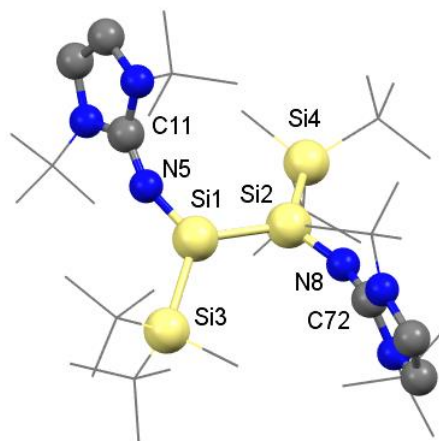

| Bond/Angle                   | Calc. [ $\text{\AA}/^\circ$ ] |
|------------------------------|-------------------------------|
| $r(\text{Si1-Si2})$          | 2.29                          |
| $r(\text{Si1/2-N5/8})$       | 1.65                          |
| $r(\text{Si1/2-Si3/4})$      | 2.38                          |
| $r(\text{N5/8-C11/72})$      | 1.30                          |
| $a(\text{N5/8-Si1/2-Si3/4})$ | 120.1                         |
| $d(\text{Si3-Si1-Si2-Si4})$  | 146.6                         |
| $d(\text{Si3-Si1-Si2-N8})$   | -27.4                         |
| $\theta$                     | 5.3/5.1                       |
| $\tau$                       | 29.2                          |

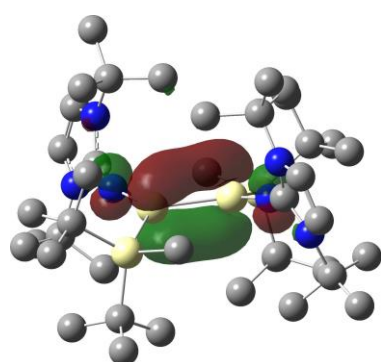

SOMO

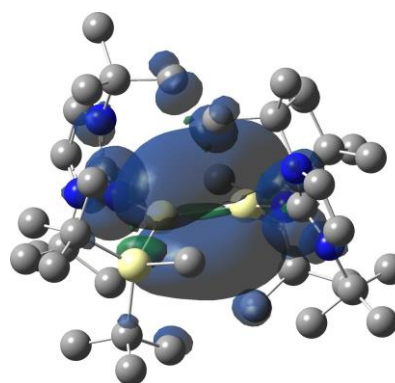

spin density

**Figure S68:** Calculated structure of **7** including selected bond length and angles, SOMO and spin density; obtained at the B3LYP-D3/def2-SVP level of theory.

### 3.9 Mechanistic investigations for the 2-(Z)/9 interconversion

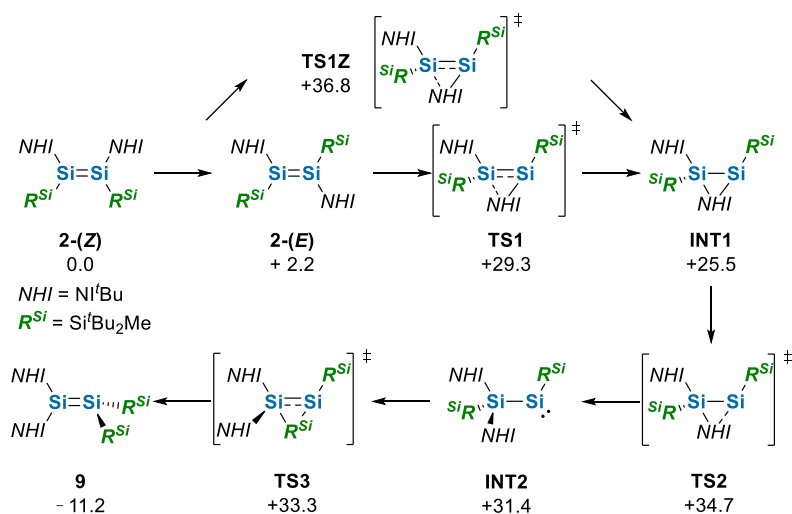

**Figure S69:** Computed reaction pathway for the interconversion of **2-(Z)/2-(E)** to **9** via initial NHI shift followed by shift of the silyl group, the alternative NHI migration starting from the Z isomer in **TS1Z** is located higher in energy.

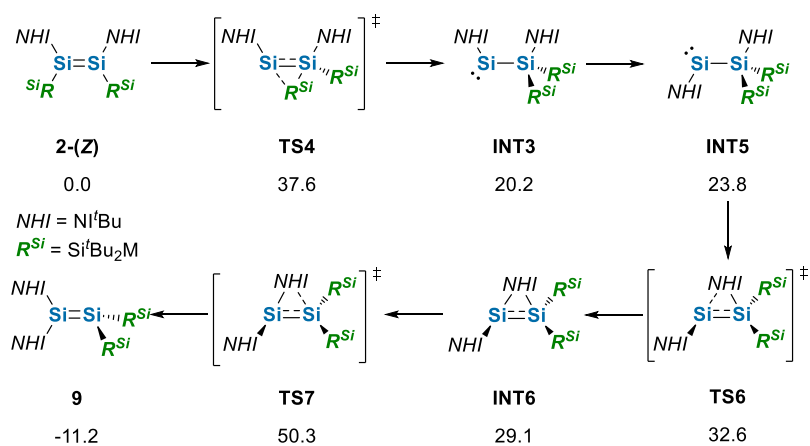

**Figure S70:** Computed reaction pathway for the interconversion of **2-(Z)/2-(E)** to **9** via initial silyl shift followed by shift of the NHI ligand.

### 3.10 NBO analysis

#### NBO analysis of disilene **9**

**Table S12:** Selected results of the NBO analysis of **9**.

| Bond                     | NPA charge  | NBO analysis (NLMOs) |                   |      | NPA analysis                                   |                |
|--------------------------|-------------|----------------------|-------------------|------|------------------------------------------------|----------------|
|                          |             | Pol.                 | Hybr.             | WBI  | Fragment                                       | NPA Charge [e] |
| $\sigma(\text{Si1-Si2})$ | +1.77 (Si1) | 45% (Si1)            | $sp^{0.52}$ (Si1) | 1.33 | NHI                                            | -0.57/-0.56    |
|                          |             | 52% (Si2)            | $sp^{2.10}$ (Si2) |      |                                                |                |
| $\pi(\text{Si1-Si2})$    | -0.77 (Si2) | 19% (Si1)            | $sp^{9.47}$ (Si1) | 1.33 | $\text{Si}(\text{NHI})_2$                      | +0.64          |
|                          |             | 73% (Si2)            | $sp^{8.97}$ (Si2) |      |                                                |                |
| Si1-N1                   | -1.26 (N1)  | 14% (Si1)            | $sp^{1.59}$ (Si1) | 0.65 | $\text{Si}^i\text{Bu}_2\text{Me}$              | +0.06/+0.07    |
|                          |             | 85% (N1)             | $sp^{0.95}$ (N1)  |      |                                                |                |
| Si1-N4                   | -1.25 (N4)  | 14% (Si1)            | $sp^{1.59}$ (Si1) | 0.65 | $\text{Si}(\text{Si}^i\text{Bu}_2\text{Me})_2$ | -0.64          |
|                          |             | 85% (N4)             | $sp^{0.95}$ (N4)  |      |                                                |                |
| Si2-Si3                  | +1.55 (Si3) | 54% (Si2)            | $sp^{1.96}$ (Si2) | 0.97 |                                                |                |
|                          |             | 43% (Si3)            | $sp^{1.42}$ (Si3) |      |                                                |                |
| Si2-Si4                  | +1.60 (Si4) | 55% (Si2)            | $sp^{1.69}$ (Si2) | 0.96 |                                                |                |
|                          |             | 41% (Si4)            | $sp^{1.36}$ (Si4) |      |                                                |                |
| LP(N1)                   | -           | 88% (N1)             | p (N1)            | -    |                                                |                |
|                          |             | 4% (Si1)             | p (Si1)           |      |                                                |                |
|                          |             | 4% (C1)              | p (C1)            |      |                                                |                |
| LP(N4)                   | -           | 88% (N4)             | p (N4)            | -    |                                                |                |
|                          |             | 5% (Si1)             | p (Si1)           |      |                                                |                |
|                          |             | 4% (C12)             | p (C12)           |      |                                                |                |

Pol. = polarization, Hybr. = hybridization, WBI = Wiberg bond index;  
 NBO analysis of the other isomers **9**<sup>12</sup>/**9**<sup>13</sup> coincide with the values of **9**.

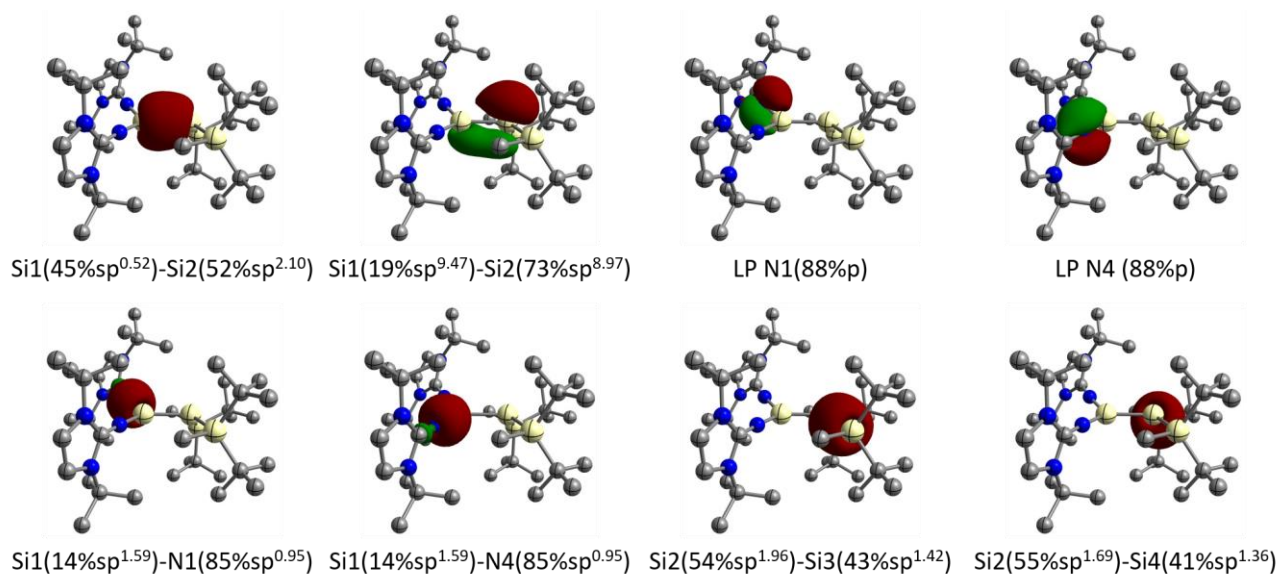

**Figure S71:** Selected NLMOs of **9**.



## NBO analysis of disilene 2-(Z)

Table S13: Selected results of the NBO analysis of 2-(Z).

| Bond                     | NPA charge  | NBO analysis (NLMOs) |                   |      | NPA analysis                                |                |
|--------------------------|-------------|----------------------|-------------------|------|---------------------------------------------|----------------|
|                          |             | Pol.                 | Hybr.             | WBI  | Fragment                                    | NPA Charge [e] |
| $\sigma(\text{Si1-Si2})$ | +0.58 (Si1) | 48% (Si1)            | $sp^{0.98}$ (Si1) | 1.43 | Si central                                  | +0.58/+0.61    |
|                          |             | 48% (Si2)            | $sp^{0.96}$ (Si2) |      |                                             |                |
| $\pi(\text{Si1-Si2})$    | +0.61 (Si2) | 47% (Si1)            | $sp^{3.88}$ (Si1) | 1.43 | NHI                                         | -0.55/-0.56    |
|                          |             | 46% (Si2)            | $sp^{3.90}$ (Si2) |      |                                             |                |
| Si1-N1                   | -1.18 (N1)  | 16% (Si1)            | $sp^{2.77}$ (Si1) | 0.70 | Si <sup>t</sup> Bu <sub>2</sub> Me          | -0.04/-0.04    |
|                          |             | 83% (N1)             | $sp^{1.15}$ (N1)  |      |                                             |                |
| Si2-N4                   | -1.18 (N4)  | 16% (Si2)            | $sp^{2.82}$ (Si2) | 0.70 | Si(Si <sup>t</sup> Bu <sub>2</sub> Me)(NHI) | -0.02/+0.02    |
|                          |             | 83% (N4)             | $sp^{1.15}$ (N4)  |      |                                             |                |
| Si1-Si3                  | +1.41 (Si3) | 48% (Si1)            | $sp^{1.43}$ (Si1) | 0.90 |                                             |                |
|                          |             | 49% (Si3)            | $sp^{1.59}$ (Si3) |      |                                             |                |
| Si2-Si4                  | +1.41 (Si4) | 48% (Si2)            | $sp^{1.41}$ (Si2) | 0.90 |                                             |                |
|                          |             | 49% (Si4)            | $sp^{1.59}$ (Si4) |      |                                             |                |
| LP(N1)                   | -           | 87% (N1)             | $sp^{14.70}$ (N1) | -    |                                             |                |
|                          |             | 4% (C1)              | p (C1)            |      |                                             |                |
|                          |             | 3% (Si1)             | p (Si1)           |      |                                             |                |
| LP(N4)                   | -           | 88% (N4)             | $sp^{14.68}$ (N4) | -    |                                             |                |
|                          |             | 4% (C21)             | p (C21)           |      |                                             |                |
|                          |             | 3% (Si2)             | p (Si2)           |      |                                             |                |

Pol. = polarization, Hybr. = hybridization, WBI = Wiberg bond index.

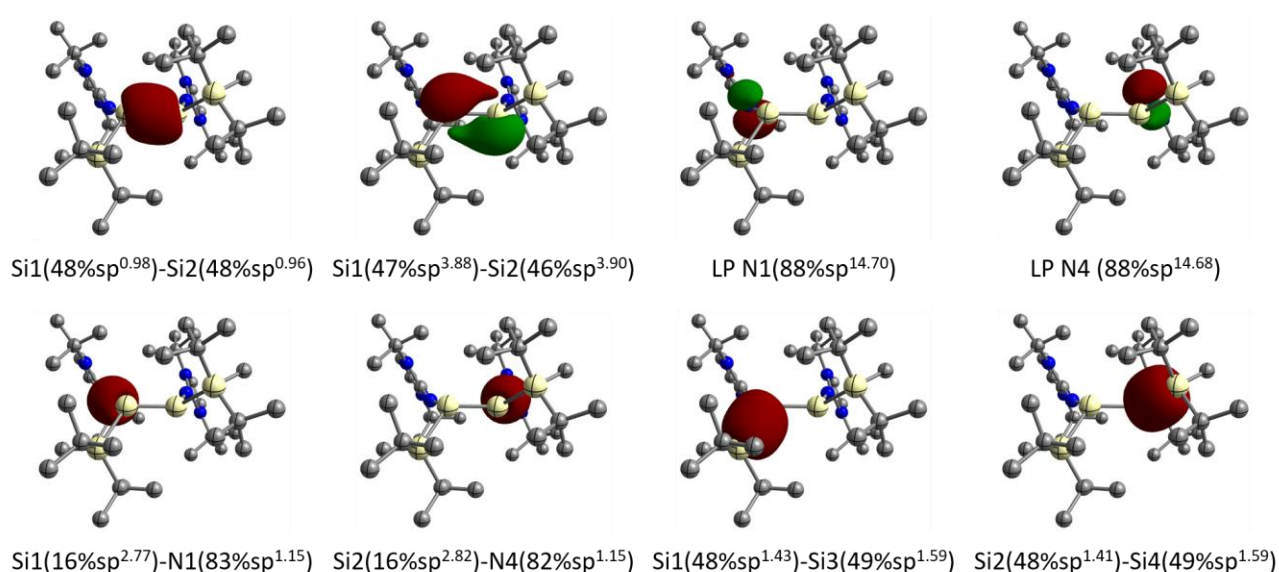

Figure S72: Selected NLMOs of 2-(Z).

## NBO analysis of disilene 2-(E)

Table S14: Selected results of the NBO analysis of 2-(E).

| Bond                     | NBO analysis (NLMOs) |                                 |                                        |      | NPA analysis                                |                |
|--------------------------|----------------------|---------------------------------|----------------------------------------|------|---------------------------------------------|----------------|
|                          | NPA charge           | Pol.                            | Hybr.                                  | WBI  | Fragment                                    | NPA Charge [e] |
| $\sigma(\text{Si1-Si2})$ | +0.59 (Si1)          | 48% (Si1)<br>48% (Si2)          | $sp^{1.02}$ (Si1)<br>$sp^{1.02}$ (Si2) | 1.44 | Si central                                  | +0.59          |
| $\pi(\text{Si1-Si2})$    | +0.59 (Si2)          | 46% (Si1)<br>46% (Si2)          | $sp^{5.41}$ (Si1)<br>$sp^{5.41}$ (Si2) | 1.44 | NHI                                         | -0.54/-0.54    |
| Si1-N1                   | -1.17 (N1)           | 17% (Si1)<br>82% (N1)           | $sp^{2.65}$ (Si1)<br>$sp^{0.99}$ (N1)  | 0.71 | Si <sup>t</sup> Bu <sub>2</sub> Me          | -0.05/-0.05    |
| Si2-N4                   | -1.17 (N4)           | 17% (Si2)<br>82% (N4)           | $sp^{2.65}$ (Si2)<br>$sp^{0.99}$ (N4)  | 0.71 | Si(Si <sup>t</sup> Bu <sub>2</sub> Me)(NHI) | 0.00           |
| Si1-Si3                  | +1.41 (Si3)          | 48% (Si1)<br>49% (Si3)          | $sp^{1.41}$ (Si1)<br>$sp^{1.55}$ (Si3) | 0.92 |                                             |                |
| Si2-Si4                  | +1.41 (Si4)          | 48% (Si2)<br>49% (Si4)          | $sp^{1.41}$ (Si2)<br>$sp^{1.55}$ (Si4) | 0.92 |                                             |                |
| LP(N1)                   | -                    | 87% (N1)<br>4% (C1)<br>3% (Si1) | p (N1)<br>p (C1)<br>p (Si1)            | -    |                                             |                |
| LP(N4)                   | -                    | 87% (N4)<br>4% (C1)<br>3% (Si1) | p (N4)<br>p (C1)<br>p (Si1)            | -    |                                             |                |

Pol. = polarization, Hybr. = hybridization, WBI = Wiberg bond index.

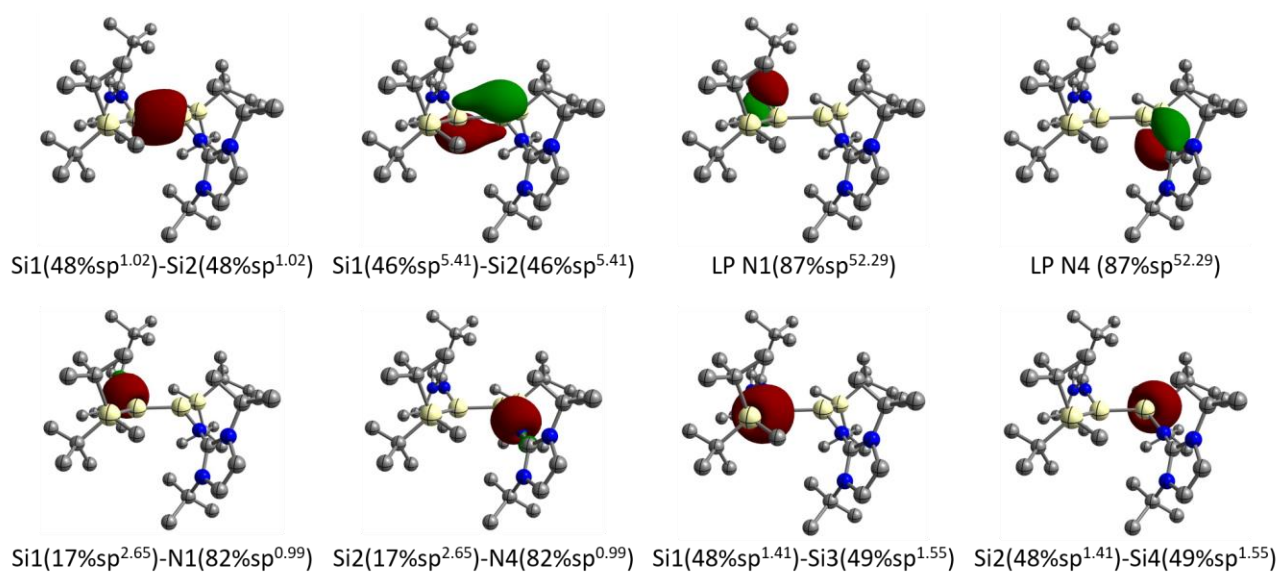

Figure S73: Selected NLMOs of 2-(E).

## NBO analysis of disilene 1-(E)

Table S15: Selected results of the NBO analysis of 1-(E).

| Bond                             | NBO analysis (NLMOs) |                                    |                                                         |      | NPA analysis                              |                |
|----------------------------------|----------------------|------------------------------------|---------------------------------------------------------|------|-------------------------------------------|----------------|
|                                  | NPA charge           | Pol.                               | Hybr.                                                   | WBI  | Fragment                                  | NPA Charge [e] |
| $\sigma(\text{Si1}-\text{Si1}')$ | +0.55 (Si1)          | 49% (Si1)<br>49% (Si1')            | $\text{sp}^{1.09}$ (Si1)<br>$\text{sp}^{1.09}$ (Si1')   | 1.54 | Si central                                | +0.55/+0.55    |
| $\pi(\text{Si1}-\text{Si1}')$    | +0.55 (Si1')         | 45% (Si1)<br>45% (Si1')            | $\text{sp}^{99.99}$ (Si1)<br>$\text{sp}^{99.99}$ (Si1') | 1.54 | NHI                                       | -0.58/-0.58    |
| Si1-N1                           | -1.20 (N1)           | 16% (Si1)<br>82% (N1)              | $\text{sp}^{2.28}$ (Si1)<br>$\text{sp}^{1.26}$ (N1)     | 0.68 | Si <sup>t</sup> Bu <sub>3</sub>           | +0.04/+0.04    |
| Si1'-N1'                         | -1.20 (N1')          | 16% (Si1')<br>82% (N1')            | $\text{sp}^{2.28}$ (Si1')<br>$\text{sp}^{1.26}$ (N1')   | 0.68 | Si(Si <sup>t</sup> Bu <sub>3</sub> )(NHI) | 0.00           |
| Si1-Si2                          | +1.67 (Si2)          | 52% (Si1)<br>44% (Si2)             | $\text{sp}^{1.21}$ (Si1)<br>$\text{sp}^{1.38}$ (Si2)    | 0.89 |                                           |                |
| Si1'-Si2'                        | +1.67 (Si2')         | 52% (Si1')<br>44% (Si2')           | $\text{sp}^{1.21}$ (Si1')<br>$\text{sp}^{1.38}$ (Si2')  | 0.89 |                                           |                |
| LP(N1)                           | -                    | 89% (N1)<br>4% (C1)<br>2% (Si1)    | $\text{sp}^{9.92}$ (N1)<br>p (C1)<br>p (Si1)            | -    |                                           |                |
| LP(N1')                          | -                    | 89% (N1')<br>4% (C1')<br>2% (Si1') | $\text{sp}^{9.92}$ (N1')<br>p (C1')<br>p (Si1')         | -    |                                           |                |

Pol. = polarization, Hybr. = hybridization, WBI = Wiberg bond index.

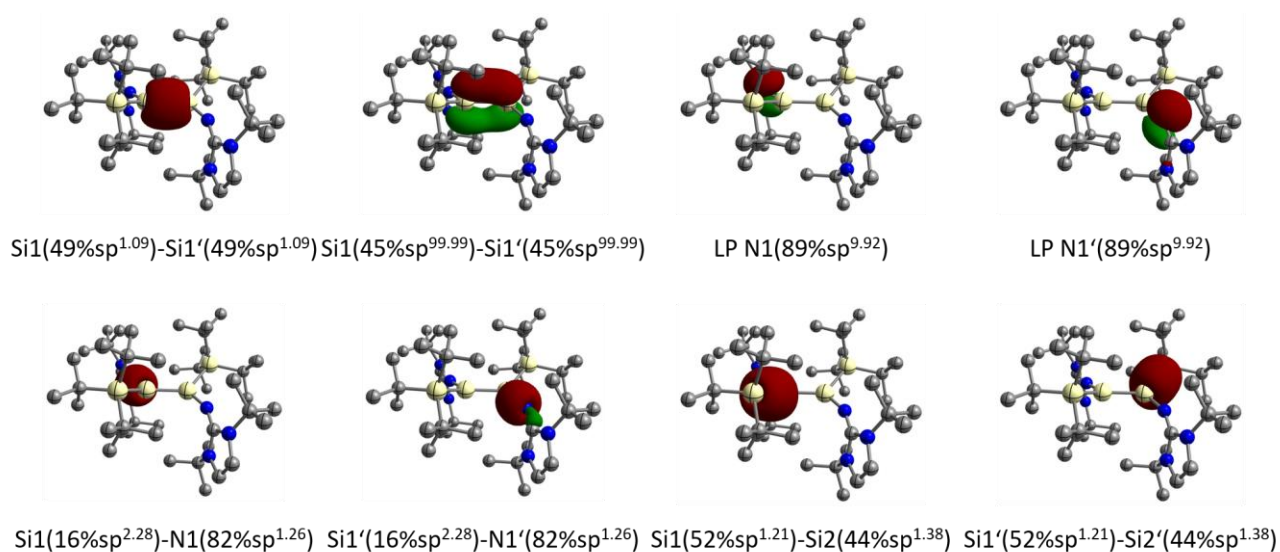

Figure S74: Selected NLMOs of 1-(E).

### 3.11 QTAIM analysis

#### QTAIM Analysis of 9

**Table S16:** Selected properties of the electron density distribution of the central Si–Si, Si–N and Si–Si<sup>Silyl</sup> bonds in **9**: Bond path lengths  $d_{A-B}$ , the electron density  $\rho_{\text{bcp}}$ , the Laplacian of the electron density  $\nabla^2\rho_{\text{bcp}}$ , the total energy density  $H_{\text{bcp}}$ , the bond ellipticity  $\epsilon_{\text{bcp}} = \lambda_1/\lambda_2 - 1$  (derived from the two negative eigenvalues of the Hessian matrix of the electron density at the bcp with  $\lambda_1 \geq \lambda_2$ ), delocalization index  $\delta_{A,B}$ .

| Bond   | $d_{A-B}$ [Å] | $\rho_{\text{bcp}}$ [eÅ <sup>-3</sup> ] | $\nabla^2\rho_{\text{bcp}}$ [eÅ <sup>-5</sup> ] | $H_{\text{bcp}}$ [EhÅ <sup>-3</sup> ] | $\epsilon_{\text{bcp}}$ | $\delta_{A,B}$ |
|--------|---------------|-----------------------------------------|-------------------------------------------------|---------------------------------------|-------------------------|----------------|
| Si1Si2 | 2.24          | 0.59                                    | -1.64                                           | -0.37                                 | 0.57                    | 1.12           |
| Si1N1  | 1.66          | 0.93                                    | 17.16                                           | -0.46                                 | 0.13                    | 0.61           |
| Si2Si4 | 2.38          | 0.54                                    | -2.29                                           | -0.22                                 | 0.12                    | 0.79           |

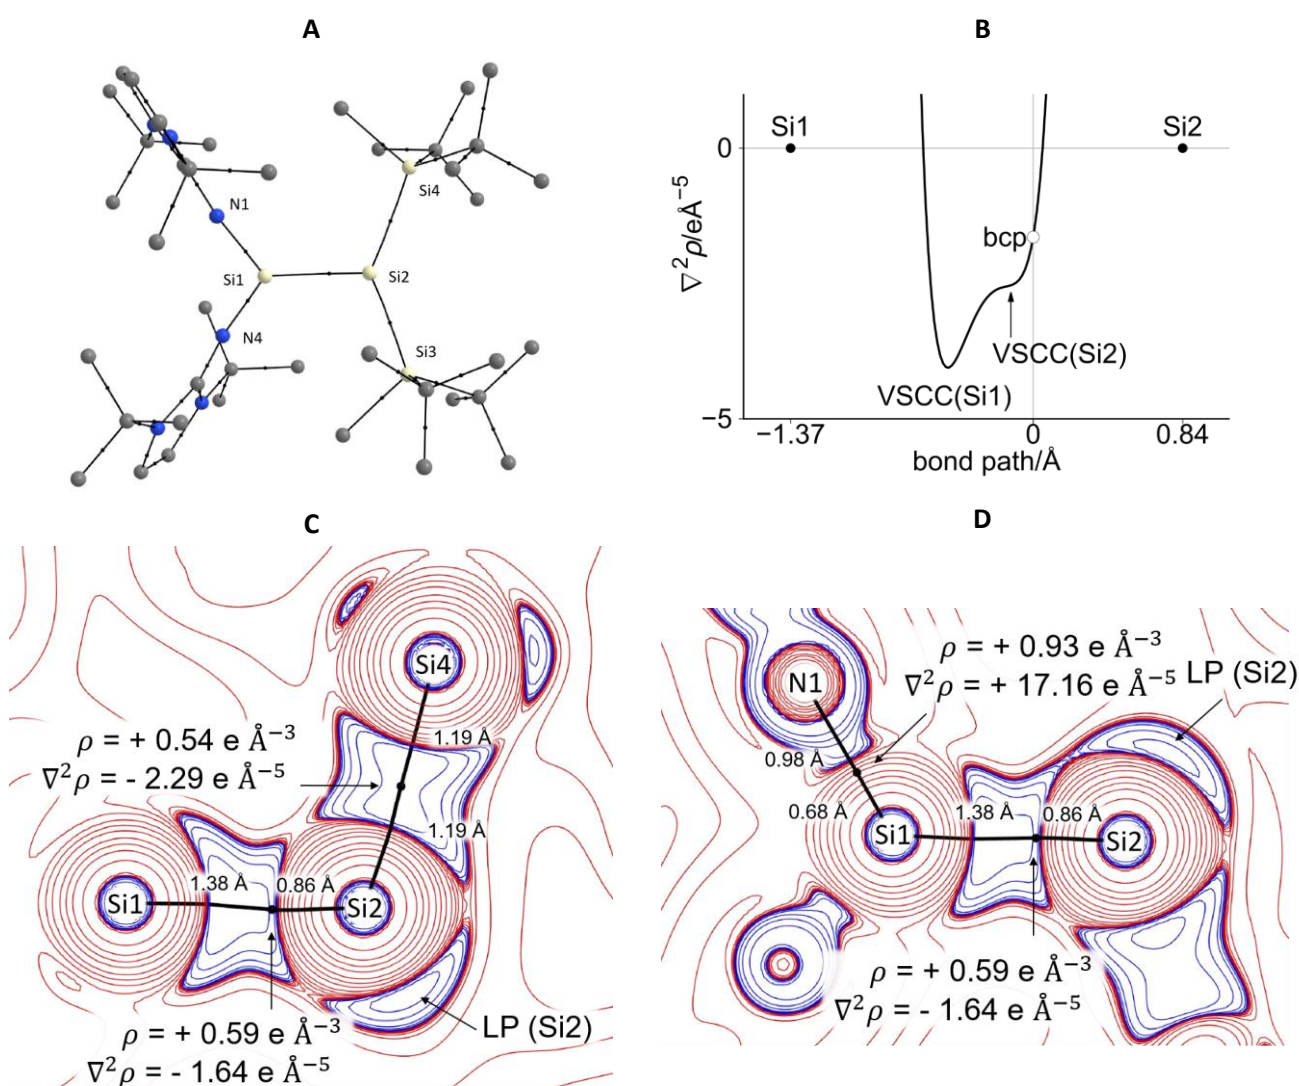

**Figure S75:** QTAIM Analysis of **9**. **(A)** Molecular graph **(B)** 1D Laplacian profile along the Si1–Si2 bond path **(C, D)** 2D plot of  $\nabla^2\rho(r)$ ; charge concentration (blue) and depletion (red), bond paths (black lines) and bond-critical points (bcps; black dots) with characteristic properties of the Si1–Si2, Si1–N1 and Si2–Si4 bonds.

## QTAIM Analysis of 2-(Z)

**Table S17:** Selected properties of the electron density distribution of the central Si–Si, Si–N and Si–Si<sup>Silyl</sup> bonds in 2-(Z): Bond path lengths  $d_{A-B}$ , the electron density  $\rho_{\text{bcp}}$ , the Laplacian of the electron density  $\nabla^2\rho_{\text{bcp}}$ , the total energy density  $H_{\text{bcp}}$ , the bond ellipticity  $\epsilon_{\text{bcp}} = \lambda_1/\lambda_2 - 1$  (derived from the two negative eigenvalues of the Hessian matrix of the electron density at the bcp with  $\lambda_1 \geq \lambda_2$ ), delocalization index  $\delta_{A,B}$ .

| Bond   | $d_{A-B}$ [Å] | $\rho_{\text{bcp}}$ [ $\text{e}\text{Å}^{-3}$ ] | $\nabla^2\rho_{\text{bcp}}$ [ $\text{e}\text{Å}^{-5}$ ] | $H_{\text{bcp}}$ [ $\text{Eh}\text{Å}^{-3}$ ] | $\epsilon_{\text{bcp}}$ | $\delta_{A,B}$ |
|--------|---------------|-------------------------------------------------|---------------------------------------------------------|-----------------------------------------------|-------------------------|----------------|
| Si1Si2 | 2.28          | 0.58                                            | -2.39                                                   | -0.26                                         | 0.48                    | 1.12           |
| Si1N1  | 1.70          | 0.85                                            | 14.76                                                   | -0.41                                         | 0.07                    | 0.71           |
| Si1Si3 | 2.41          | 0.55                                            | -2.56                                                   | -0.23                                         | 0.08                    | 0.72           |

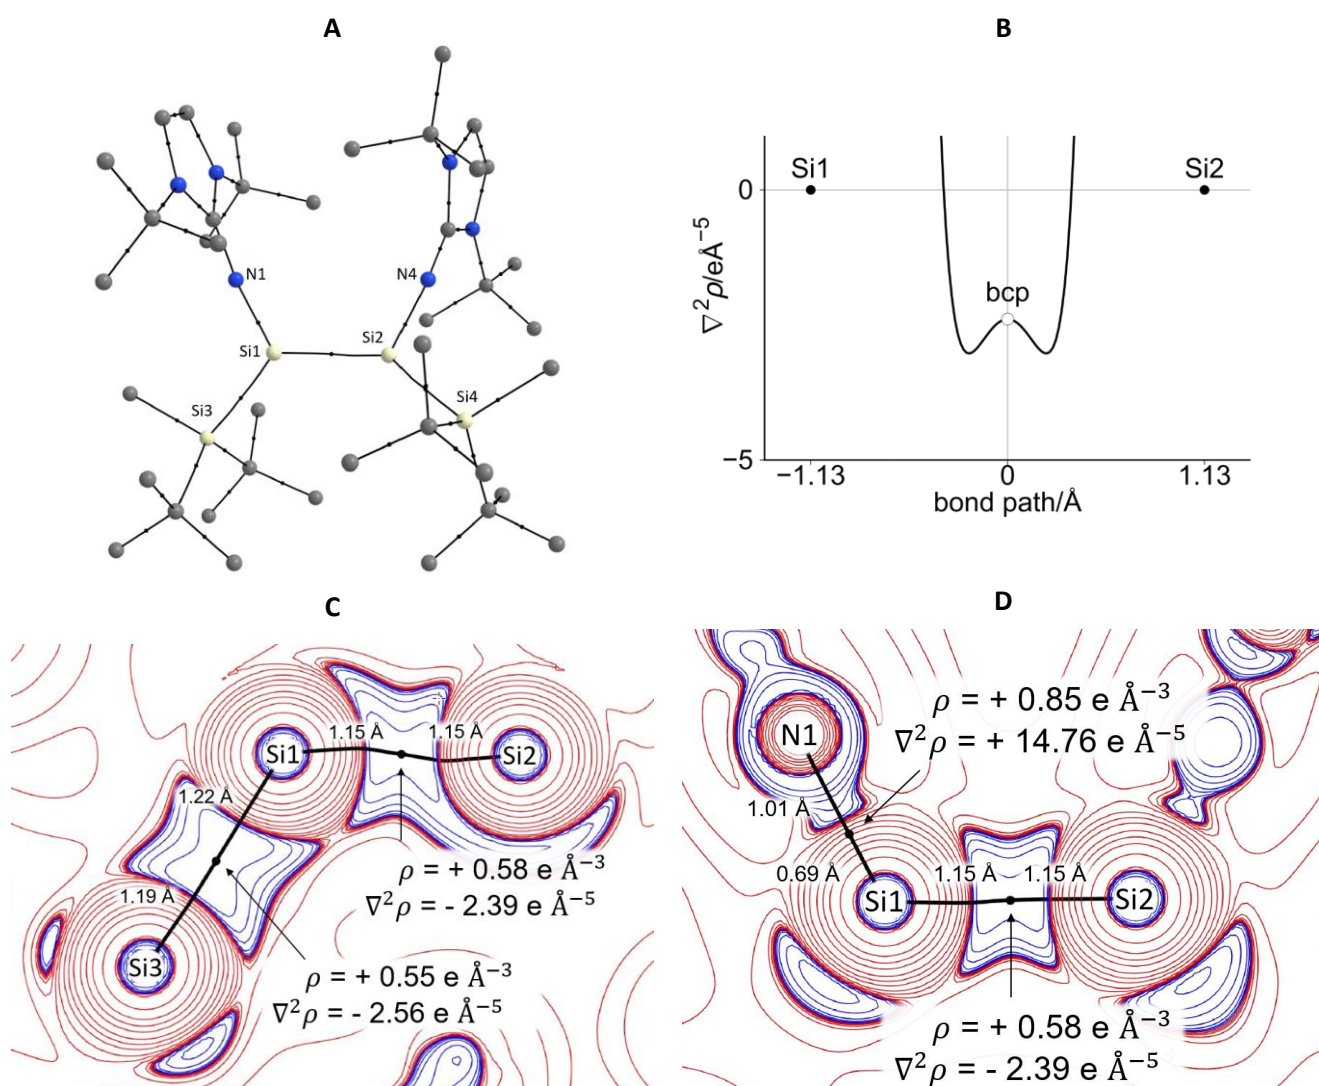

**Figure S76:** QTAIM Analysis of 2-(Z). (A) Molecular graph (B) 1D Laplacian profile along the Si1–Si2 bond path (C, D) 2D plot of  $\nabla^2\rho(r)$ ; charge concentration (blue) and depletion (red), bond paths (black lines) and bond-critical points (bcps; black dots) with characteristic properties of the Si1–Si2, Si1–N1 and Si1–Si3 bonds.

## QTAIM Analysis of 2-(E)

**Table S18:** Selected properties of the electron density distribution of the central Si–Si, Si–N and Si–Si<sup>Silyl</sup> bonds in 2-(E): Bond path lengths  $d_{A-B}$ , the electron density  $\rho_{\text{bcp}}$ , the Laplacian of the electron density  $\nabla^2\rho_{\text{bcp}}$ , the total energy density  $H_{\text{bcp}}$ , the bond ellipticity  $\varepsilon_{\text{bcp}} = \lambda_1/\lambda_2 - 1$  (derived from the two negative eigenvalues of the Hessian matrix of the electron density at the bcp with  $\lambda_1 \geq \lambda_2$ ), delocalization index  $\delta_{A,B}$ .

| Bond   | $d_{A-B}$ [Å] | $\rho_{\text{bcp}}$ [eÅ <sup>-3</sup> ] | $\nabla^2\rho_{\text{bcp}}$ [eÅ <sup>-5</sup> ] | $H_{\text{bcp}}$ [EhÅ <sup>-3</sup> ] | $\varepsilon_{\text{bcp}}$ | $\delta_{A,B}$ |
|--------|---------------|-----------------------------------------|-------------------------------------------------|---------------------------------------|----------------------------|----------------|
| Si1Si2 | 2.26          | 0.59                                    | -2.53                                           | -0.28                                 | 0.52                       | 1.15           |
| Si1N1  | 1.70          | 0.86                                    | 14.87                                           | -0.41                                 | 0.09                       | 0.71           |
| Si1Si3 | 2.39          | 0.57                                    | -2.74                                           | -0.24                                 | 0.10                       | 0.74           |

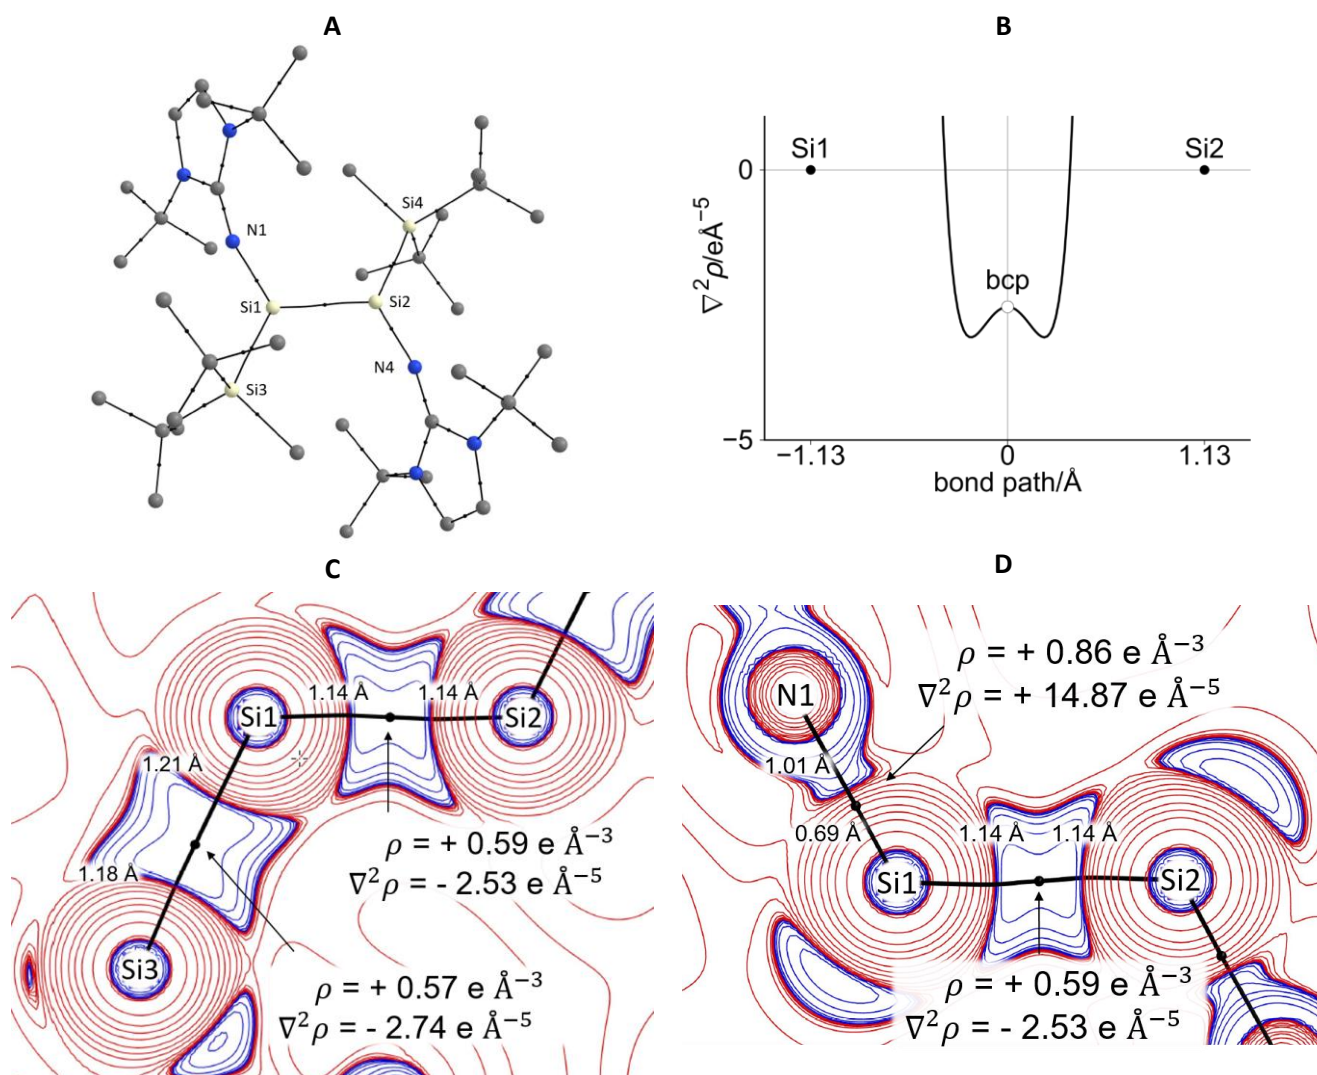

**Figure S77:** QTAIM Analysis of 2-(E). (A) Molecular graph (B) 1D Laplacian profile along the Si1–Si2 bond path (C, D) 2D plot of  $\nabla^2\rho(r)$ ; charge concentration (blue) and depletion (red), bond paths (black lines) and bond-critical points (bcps; black dots) with characteristic properties of the Si1–Si2, Si1–N1 and Si1–Si3 bonds.

### 3.12 Steric effects of the silyl ligands

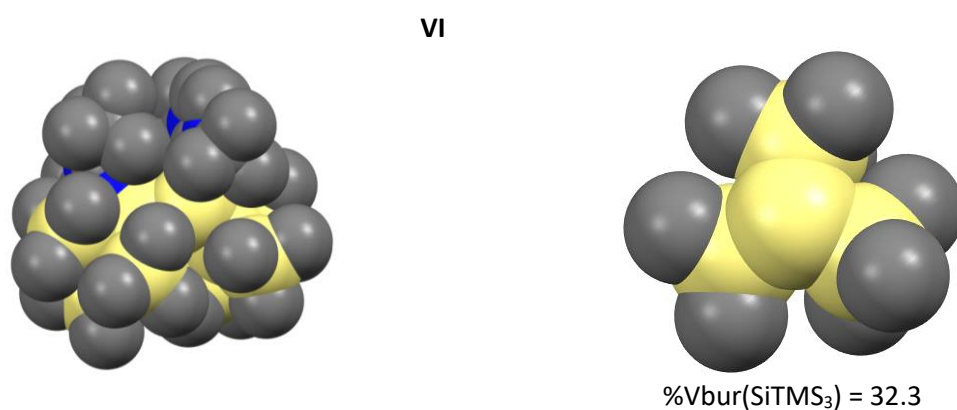

**Figure S78:** Space filling diagrams of disilene **VI** and the hypersilyl ligand with  $\%V_{bur}$  calculated with the SambVca 2.1 web tool using default parameters with H atoms omitted from the calculation.<sup>S61-62</sup>

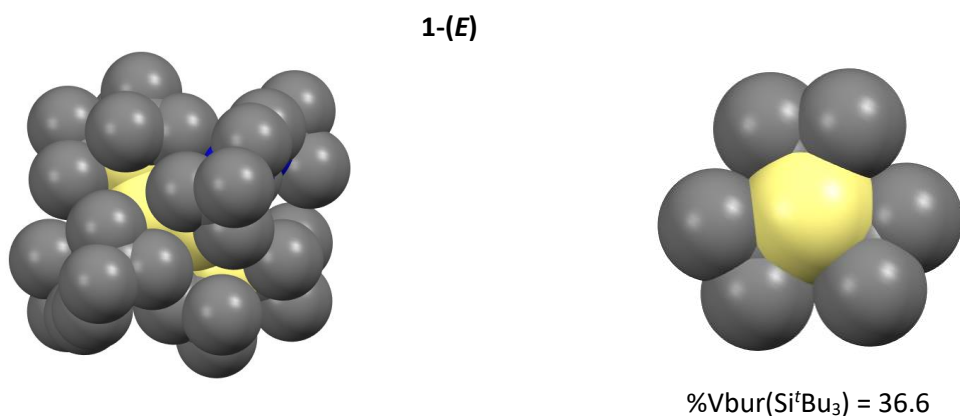

**Figure S79:** Space filling diagrams of disilene **1-(E)** and the supersilyl ligand with  $\%V_{bur}$  calculated with the SambVca 2.1 web tool using default parameters with H atoms omitted from the calculation.<sup>S61-62</sup>

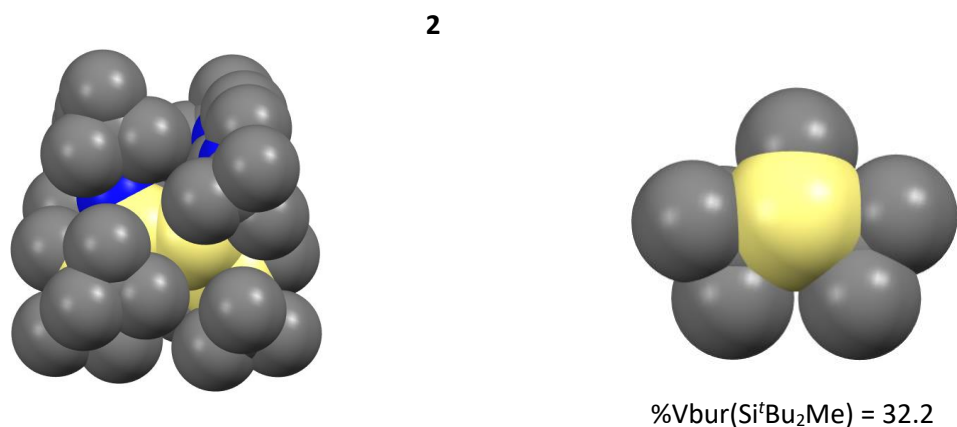

**Figure S80:** Space filling diagrams of disilene **2-(Z)** and the  $\text{Si}^t\text{Bu}_2\text{Me}$  ligand with  $\%V_{bur}$  calculated with the SambVca 2.1 web tool using default parameters with H atoms omitted from the calculation.<sup>S61-62</sup>

### 3.13 Calculated energies

**Table S19.** Calculated energies at the B3LYP-D3/def2-svp level of theory, values marked with \* were obtained at the PBEh-3c level of theory.

| Structure                                                                                                   | E(SCF) [H/particle] |
|-------------------------------------------------------------------------------------------------------------|---------------------|
| ((Si <sup>t</sup> Bu <sub>3</sub> )(I <sup>t</sup> BuN)Si) <sub>2</sub> (1-(E))                             | -3294.3965523       |
| ((Si <sup>t</sup> Bu <sub>3</sub> )(I <sup>t</sup> BuN)Si) <sub>2</sub> (1-(E'))                            | -3294.397509        |
| (Si <sup>t</sup> Bu <sub>3</sub> )(I <sup>t</sup> BuN)Si (1 <sup>M</sup> )                                  | -1647.171551        |
| ((Si <sup>t</sup> Bu <sub>3</sub> )(I <sup>t</sup> BuN)Si) <sub>2</sub> (1-(Z))                             | -3294.392351        |
| ((Si <sup>t</sup> Bu <sub>2</sub> Me)(I <sup>t</sup> BuN)Si) <sub>2</sub> (2-(Z))                           | -3058.721827        |
| ((Si <sup>t</sup> Bu <sub>2</sub> Me)(I <sup>t</sup> BuN)Si) <sub>2</sub> (2 <sup>M</sup> )                 | -1529.323700        |
| ((Si <sup>t</sup> Bu <sub>2</sub> Me)(I <sup>t</sup> BuN)Si) <sub>2</sub> (2-(E))                           | -3058.713479        |
| ((SiTMS <sub>3</sub> )(I <sup>t</sup> BuN)Si) <sub>2</sub> (VI-(Z))                                         | -4802.683889        |
| ((SiTMS <sub>3</sub> )(I <sup>t</sup> BuN)Si) (VI <sup>M</sup> )                                            | -2401.311554        |
| ((SiTMS <sub>3</sub> )(I <sup>t</sup> BuN)Si) <sub>2</sub> (VI-(E))                                         | -4802.672546        |
| (I <sup>t</sup> BuN) <sub>2</sub> Si→Si(Si <sup>t</sup> Bu <sub>2</sub> Me) <sub>2</sub> (9)                | -3058.736176        |
| (I <sup>t</sup> BuN) <sub>2</sub> Si→Si(Si <sup>t</sup> Bu <sub>2</sub> Me) <sub>2</sub> (9 <sup>I2</sup> ) | -3058.733441        |
| (I <sup>t</sup> BuN) <sub>2</sub> Si→Si(Si <sup>t</sup> Bu <sub>2</sub> Me) <sub>2</sub> (9 <sup>I3</sup> ) | -3058.734007        |
| (I <sup>t</sup> BuN) <sub>2</sub> Si→Si(Si <sup>t</sup> Bu <sub>2</sub> Me) <sub>2</sub> (9 <sup>I4</sup> ) | -3058.732167        |
| TS1                                                                                                         | -3058.675009        |
| TS1Z                                                                                                        | -3058.660623        |
| INT1                                                                                                        | -3058.679623        |
| TS2                                                                                                         | -3058.669739        |
| INT2                                                                                                        | -3058.672044        |
| TS3                                                                                                         | -3058.669728        |
| TS4                                                                                                         | -3058.667883        |
| INT3                                                                                                        | -3058.693929        |
| INT4                                                                                                        | -3058.690227        |
| TS5                                                                                                         | -3058.672058        |
| INT5                                                                                                        | -3058.675169        |
| TS6                                                                                                         | -3058.674241        |
| INT6                                                                                                        | -3058.675169        |
| TS7                                                                                                         | -3058.649264        |
| 7                                                                                                           | -3058.563135        |



|                                    |              |
|------------------------------------|--------------|
| H <sub>2</sub>                     | -1.173790    |
| 2 + H <sub>2</sub> *               | -3055.876733 |
| TS2H <sub>2</sub> *                | -3055.859669 |
| 4                                  | -3059.960943 |
| TS2 <sup>M</sup> H <sub>2</sub>    | -1530.473817 |
| TS2 <sup>M</sup> H <sub>2</sub> '  | -1530.452067 |
| INT2 <sup>M</sup> H <sub>2</sub>   | -1530.564253 |
| INT2 <sup>M</sup> H <sub>2</sub> ' | -1530.513200 |
| TSINT2 <sup>M</sup>                | -3059.889791 |

---

### 3.14 Cartesian Coordinates (x,y,z) for the optimized structures

| 1-(E) |    |          |                   |
|-------|----|----------|-------------------|
|       | H  | 0.72807  | 4.82051 -2.77257  |
|       | C  | 2.50725  | 5.36015 -0.81077  |
|       | H  | 2.16689  | 6.41243 -0.79699  |
|       | H  | 3.05400  | 5.20948 -1.75317  |
|       | H  | 3.22236  | 5.24664 0.01601   |
|       | C  | 1.97417  | 2.03559 -2.75145  |
|       | C  | 3.60096  | 0.64118 0.39803   |
|       | H  | 2.73448  | 0.22894 0.92197   |
|       | H  | 4.48745  | 0.44227 1.02816   |
|       | H  | 3.72797  | 0.06585 -0.52514  |
|       | C  | 4.71435  | 2.66956 -0.52626  |
|       | H  | 4.69123  | 3.74770 -0.73583  |
|       | H  | 4.90357  | 2.14635 -1.47516  |
|       | H  | 5.59028  | 2.48117 0.12236   |
|       | C  | 3.33890  | 2.79654 1.57072   |
|       | H  | 3.34743  | 3.89467 1.53966   |
|       | H  | 4.20346  | 2.48339 2.18490   |
|       | H  | 2.42883  | 2.47757 2.10291   |
|       | C  | 3.43805  | 2.15362 0.17020   |
|       | C  | 0.59749  | 1.92580 -3.44564  |
|       | H  | 0.05433  | 2.87723 -3.49117  |
|       | H  | -0.04925 | 1.19156 -2.94260  |
|       | H  | 0.73718  | 1.57991 -4.48654  |
|       | C  | 2.84474  | 3.03506 -3.54195  |
|       | H  | 2.38289  | 4.02990 -3.61613  |
|       | H  | 2.98241  | 2.66856 -4.57635  |
|       | H  | 3.84694  | 3.16288 -3.10831  |
|       | C  | 2.62230  | 0.64307 -2.84873  |
|       | H  | 2.60452  | 0.28797 -3.89538  |
|       | H  | 2.07894  | -0.09729 -2.24446 |
|       | H  | 3.67368  | 0.64435 -2.52695  |
|       | Si | -0.00224 | -1.11969 0.00167  |
|       | N  | 1.44121  | -2.01627 0.20686  |
|       | C  | 2.53271  | -2.27287 0.82977  |
|       | Si | -1.78259 | -2.51850 -0.83996 |
|       | N  | 2.86447  | -2.14370 2.19880  |
|       | H  | 4.72466  | -2.35015 3.31989  |
|       | C  | 4.72272  | 2.83678 1.18613   |
|       | H  | -5.73758 | 3.13200 0.95327   |
|       | N  | -3.71856 | 2.75385 0.22692   |
|       | C  | -1.97417 | 1.78831 3.34646   |
|       | C  | -1.76693 | 0.26802 3.40428   |
|       | H  | -1.18780 | 0.00017 4.30038   |
|       | H  | -1.21671 | -0.09649 2.52694  |
|       | H  | -2.73550 | -0.25085 3.45072  |
|       | C  | -0.63571 | 2.53625 3.23967   |
|       | H  | -0.80260 | 3.62186 3.18094   |
|       | H  | -0.06003 | 2.22896 2.36056   |
|       | H  | -0.02652 | 2.32379 4.13068   |
|       | C  | -2.64105 | 2.23704 4.66233   |
|       | H  | -2.89203 | 3.30862 4.64824   |
|       | H  | -1.93335 | 2.06542 5.48610   |
|       | H  | -3.54847 | 1.65995 4.89384   |
|       | C  | -3.16053 | 4.89408 -0.81068  |
|       | H  | -3.14927 | 5.49402 -1.73395  |
|       | H  | -2.12896 | 4.78673 -0.45790  |
|       | H  | -3.73103 | 5.44247 -0.04426  |
|       | C  | -3.79569 | 3.51384 -1.05763  |
|       | C  | 1.28491  | 4.42645 -0.67181  |
|       | C  | -5.27095 | 3.69788 -1.45690  |
|       | H  | -5.82042 | 4.35945 -0.77124  |
|       | H  | -5.79256 | 2.72998 -1.51417  |
|       | H  | -5.30844 | 4.16255 -2.45298  |
|       | C  | -3.10303 | 2.76338 -2.20286  |
|       | H  | -3.13179 | 3.38351 -3.11190  |
|       | H  | -3.63031 | 1.82337 -2.41341  |
|       | H  | -2.06523 | 2.52525 -1.96096  |
|       | C  | 0.60881  | 4.71058 0.68676   |
|       | H  | 0.34969  | 5.78398 0.75455   |
|       | H  | 1.25249  | 4.47855 1.54527   |
|       | H  | -0.31721 | 4.13343 0.79783   |
|       | C  | 0.27732  | 4.81857 -1.77105  |
|       | H  | -0.09674 | 5.84203 -1.58512  |
|       | H  | -0.59222 | 4.15089 -1.79000  |
|       | H  | 0.63571  | -2.53625 3.23967  |
|       | H  | 0.80260  | -3.62186 3.18094  |
|       | H  | 0.06003  | -2.22896 2.36056  |
|       | H  | 0.02652  | -2.32379 4.13068  |
|       | C  | 2.64105  | -2.23704 4.66233  |
|       | H  | 2.89203  | -3.30862 4.64824  |
|       | H  | 1.93335  | -2.06542 5.48610  |
|       | H  | 3.54847  | -1.65995 4.89384  |
|       | C  | 3.16053  | -4.89408 -0.81068 |
|       | H  | 3.14927  | -5.49402 -1.73395 |
|       | H  | 2.12896  | -4.78673 -0.45790 |
|       | H  | 3.73103  | -5.44247 -0.04426 |
|       | C  | 3.79569  | -3.51384 -1.05763 |
|       | C  | -1.28491 | -4.42645 -0.67181 |
|       | C  | 5.27095  | -3.69788 -1.45690 |
|       | H  | 5.82042  | -4.35945 -0.77124 |
|       | H  | 5.79256  | -2.72998 -1.51417 |
|       | H  | 5.30844  | -4.16255 -2.45298 |
|       | C  | 3.10303  | -2.76338 -2.20286 |
|       | H  | 3.13179  | -3.38351 -3.11190 |
|       | H  | 3.63031  | -1.82337 -2.41341 |
|       | H  | 2.06523  | -2.52525 -1.96096 |
|       | C  | -0.60881 | -4.71058 0.68676  |
|       | H  | -0.34969 | -5.78398 0.75455  |
|       | H  | -1.25249 | -4.47855 1.54527  |
|       | H  | 0.31721  | -4.13343 0.79783  |
|       | C  | -0.27732 | -4.81857 -1.77105 |
|       | H  | 0.09674  | -5.84203 -1.58512 |
|       | H  | 0.59222  | -4.15089 -1.79000 |
|       | H  | -0.72807 | -4.82051 -2.77257 |
|       | C  | -2.50725 | -5.36015 -0.81077 |
|       | H  | -2.16689 | -6.41243 -0.79699 |
|       | H  | -3.05400 | -5.20948 -1.75317 |
|       | H  | -3.22236 | -5.24664 0.01601  |
|       | C  | -1.97417 | -2.03559 -2.75145 |
|       | Si | -1.78259 | -2.51850 -0.83996 |
|       | N  | 2.86447  | -2.14370 2.19880  |
|       | C  | 4.21320  | -2.45315 2.37229  |
|       | H  | 4.72466  | -2.35015 3.31989  |
|       | C  | 4.72272  | -2.83678 1.18613  |
|       | H  | 5.73758  | -3.13200 0.95327  |
|       | N  | 3.71856  | -2.75385 0.22692  |
|       | C  | 1.97417  | -1.78831 3.34646  |
|       | C  | 1.76693  | -0.26802 3.40428  |
|       | H  | 1.18780  | -0.00017 4.30038  |
|       | H  | 1.21671  | 0.09649 2.52694   |
|       | H  | 2.73550  | 0.25085 3.45072   |

H -2.42883 -2.47757 2.10291  
C -3.43805 -2.15362 0.17020  
C -0.59749 -1.92580 -3.44564  
H -0.05433 -2.87723 -3.49117  
H 0.04925 -1.19156 -2.94260  
H -0.73718 -1.57991 -4.48654  
C -2.84474 -3.03506 -3.54195  
H -2.38289 -4.02990 -3.61613  
H -2.98241 -2.66856 -4.57635  
H -3.84694 -3.16288 -3.10831  
C -2.62230 -0.64307 -2.84873  
H -2.60452 -0.28797 -3.89538  
H -2.07894 0.09729 -2.24446  
H -3.67368 -0.64435 -2.52695

### 1-(E)'

Si 0.91070 -0.55548 -0.21823  
N 2.44928 -0.02114 0.26540  
C 3.31481 0.70254 0.87512  
Si 1.02513 -2.91167 -0.85565  
N 3.40289 1.02528 2.24538  
C 4.45926 1.91354 2.43822  
H 4.68178 2.36509 3.39578  
C 5.07568 2.10957 1.25687  
H 5.92351 2.74501 1.03693  
N 4.40986 1.37047 0.28253  
C 2.55457 0.52981 3.37246  
C 1.23946 1.31970 3.42186  
H 0.65167 1.02296 4.30331  
H 0.62229 1.13501 2.53054  
H 1.44214 2.39895 3.48860  
C 2.30437 -0.97984 3.23014  
H 3.25760 -1.52692 3.18774  
H 1.73511 -1.21823 2.32814  
H 1.73452 -1.33867 4.09956  
C 3.30630 0.74407 4.70124  
H 4.30263 0.27625 4.68621  
H 2.72407 0.27729 5.50875  
H 3.41467 1.80807 4.95830  
C 5.82831 -0.31707 -0.77514  
H 6.31353 -0.66060 -1.70194  
H 5.14160 -1.10056 -0.43613  
H 6.60335 -0.18218 -0.00411  
C 5.07358 1.00423 -1.00633  
C 2.86023 -3.62732 -0.67360  
C 6.07824 2.10509 -1.39330  
H 6.93746 2.15973 -0.70914  
H 5.59126 3.09157 -1.43501  
H 6.47697 1.88035 -2.39319  
C 4.06419 0.88776 -2.15534  
H 4.59441 0.58820 -3.07210  
H 3.58311 1.85709 -2.33974  
H 3.28393 0.15490 -1.94261  
C 3.48447 -3.21482 0.67675  
H 4.51856 -3.60249 0.74214  
H 2.93600 -3.61238 1.54042  
H 3.52287 -2.12388 0.78055  
C 3.76743 -3.06914 -1.78861  
H 4.81581 -3.36371 -1.59866  
H 3.74091 -1.97368 -1.83688  
H 3.50062 -3.45960 -2.78003  
C 2.90046 -5.16782 -0.77607  
H 3.95230 -5.50907 -0.74953  
H 2.46143 -5.54494 -1.71134  
H 2.38576 -5.66058 0.06056  
C 0.50892 -2.84407 -2.76632  
C -1.55304 -3.23323 0.41283  
H -1.37020 -2.27695 0.91014  
H -2.23500 -3.81323 1.06152  
H -2.09793 -3.01817 -0.51240

C -0.58042 -5.35633 -0.45862  
H 0.30294 -5.97828 -0.65837  
H -1.12295 -5.22764 -1.40667  
H -1.24305 -5.93470 0.21222  
C 0.34601 -4.26459 1.60231  
H 1.22378 -4.92503 1.58544  
H -0.41614 -4.75643 2.23468  
H 0.63302 -3.32962 2.10838  
C -0.23914 -4.00238 0.19745  
C 1.23112 -1.69441 -3.50743  
H 2.31860 -1.82522 -3.56156  
H 1.03238 -0.71789 -3.03887  
H 0.85810 -1.63537 -4.54660  
C 0.79007 -4.15942 -3.52207  
H 1.86492 -4.37789 -3.59949  
H 0.40363 -4.08361 -4.55566  
H 0.30458 -5.02969 -3.05797  
C -0.99851 -2.54121 -2.85609  
H -1.28474 -2.34183 -3.90505  
H -1.27257 -1.65177 -2.27088  
H -1.61736 -3.38044 -2.50758  
Si -0.91778 0.74866 0.24751  
N -2.49513 0.04646 0.22223  
C -3.33999 -0.71045 0.82462  
Si -0.97680 2.91452 -0.85087  
N -3.45713 -1.07503 2.18908  
C -4.48227 -2.01150 2.32442  
H -4.71134 -2.50486 3.25927  
C -5.05656 -2.19910 1.12111  
H -5.86754 -2.86644 0.85946  
N -4.39572 -1.40712 0.18832  
C -2.69156 -0.55850 3.36502  
C -1.30347 -1.21317 3.42214  
H -0.77422 -0.89444 4.33236  
H -0.69128 -0.92458 2.55859  
H -1.39359 -2.30900 3.43870  
C -2.58837 0.97459 3.31084  
H -3.58720 1.42817 3.22796  
H -1.97969 1.31818 2.46629  
H -2.11162 1.34180 4.23208  
C -3.44631 -0.91649 4.66093  
H -4.47796 -0.53308 4.65271  
H -2.92024 -0.45303 5.50782  
H -3.46820 -1.99982 4.85074  
C -5.80472 0.30767 -0.82927  
H -6.27224 0.68803 -1.75078  
H -5.12436 1.07645 -0.44648  
H -6.59428 0.14174 -0.07911  
C -5.04506 -1.00452 -1.09608  
C -2.80260 3.66407 -0.67905  
C -6.04610 -2.08998 -1.53030  
H -6.91310 -2.16670 -0.85781  
H -5.56045 -3.07559 -1.60119  
H -6.43169 -1.83026 -2.52706  
C -4.01502 -0.85372 -2.22276  
H -4.51485 -0.47092 -3.12575  
H -3.57378 -1.83015 -2.46422  
H -3.20856 -0.17512 -1.93715  
C -3.41181 3.33124 0.70055  
H -4.41897 3.78233 0.77973  
H -2.81813 3.71625 1.54024  
H -3.52007 2.24771 0.83540  
C -3.73521 3.04840 -1.74107  
H -4.77922 3.35336 -1.54296  
H -3.70416 1.95303 -1.72482  
H -3.49348 3.38197 -2.75907  
C -2.83420 5.19676 -0.86581  
H -3.88362 5.54603 -0.84635  
H -2.40476 5.51898 -1.82567  
H -2.30671 5.73211 -0.06394  
C -0.50734 2.72897 -2.76955  
C 1.63414 3.30973 0.33083

H 1.46270 2.40404 0.92019  
H 2.34158 3.93869 0.90269  
H 2.14357 3.00930 -0.59104  
C 0.64998 5.37321 -0.66261  
H -0.23495 5.98634 -0.88118  
H 1.16548 5.17666 -1.61420  
H 1.33347 5.99181 -0.05112  
C -0.22957 4.43399 1.49133  
H -1.10762 5.09300 1.44999  
H 0.54902 4.96858 2.06688  
H -0.50329 3.53677 2.06906  
C 0.31733 4.07018 0.09350  
C -1.23289 1.52097 -3.40190  
H -2.32331 1.63265 -3.42748  
H -1.00119 0.58979 -2.86510  
H -0.89378 1.39112 -4.44647  
C -0.83658 3.99196 -3.59420  
H -1.91506 4.19702 -3.64279  
H -0.49027 3.85449 -4.63566  
H -0.34145 4.89347 -3.20562  
C 0.99936 2.45044 -2.90435  
H 1.24857 2.20962 -3.95412  
H 1.30199 1.58854 -2.29244  
H 1.61678 3.31348 -2.61609

### 1<sup>M</sup>

Si -0.16425 -0.05497 -1.49202  
Si -2.15851 -0.00534 -0.01575  
N 1.16984 -0.00510 -0.47029  
N 3.20363 1.13581 0.12249  
N 3.22793 -1.09539 0.13934  
C 2.40850 0.00952 -0.12025  
C 4.46978 0.71183 0.52896  
C 4.48459 -0.63751 0.53956  
C 2.81408 2.54577 -0.16033  
C 1.56380 2.91657 0.65447  
C 2.56621 2.71152 -1.67193  
C 3.95733 3.48535 0.25517  
C 2.88037 -2.51458 -0.15165  
C 1.62465 -2.92069 0.63753  
C 2.66606 -2.68421 -1.66794  
C 4.03906 -3.42450 0.28678  
C -1.90135 -0.15419 1.94426  
C -0.71247 0.73043 2.37989  
C -1.54204 -1.59682 2.35555  
C -3.15262 0.26113 2.74686  
C -3.08430 1.69243 -0.46961  
C -2.48393 2.86800 0.33032  
C -4.60211 1.64671 -0.19629  
C -2.87341 2.03655 -1.96316  
C -3.17276 -1.56484 -0.70378  
C -2.22898 -2.78975 -0.76982  
C -4.39923 -1.93369 0.15497  
C -3.65964 -1.30880 -2.14687  
H 5.26012 1.39736 0.80569  
H 5.28951 -1.30114 0.82748  
H 1.75377 2.79242 1.73142  
H 0.71333 2.28386 0.38810  
H 1.29251 3.96662 0.46623  
H 2.30102 3.75610 -1.89836  
H 1.75000 2.06684 -2.02239  
H 3.47486 2.45394 -2.23845  
H 4.18893 3.39894 1.32783  
H 3.64454 4.52206 0.06457  
H 4.87497 3.30591 -0.32513  
H 1.39480 -3.98162 0.45532  
H 0.75680 -2.32558 0.34019  
H 1.78539 -2.77911 1.71723  
H 2.43264 -3.73495 -1.90091  
H 3.57848 -2.40188 -2.21638

H 1.83928 -2.06090 -2.03308  
H 4.25006 -3.32827 1.36291  
H 4.96174 -3.22431 -0.27837  
H 3.75576 -4.46932 0.09445  
H -0.54698 0.62417 3.46888  
H -0.87753 1.79779 2.18450  
H 0.21399 0.43504 1.86707  
H -1.31599 -1.62680 3.43780  
H -0.65019 -1.96582 1.83163  
H -2.36112 -2.30825 2.18117  
H -2.96710 0.12058 3.82879  
H -4.03807 -0.33895 2.48874  
H -3.41286 1.31941 2.60416  
H -2.67158 2.79124 1.41016  
H -2.93556 3.81901 -0.00860  
H -1.39614 2.95719 0.18262  
H -4.83776 1.40801 0.85080  
H -5.11579 0.90947 -0.83023  
H -5.05600 2.63159 -0.41757  
H -1.80958 2.19639 -2.20707  
H -3.40265 2.97708 -2.20692  
H -3.25026 1.26535 -2.64706  
H -1.83624 -3.08915 0.21015  
H -1.36579 -2.61008 -1.43569  
H -2.76942 -3.66122 -1.18511  
H -4.12251 -2.23511 1.17534  
H -4.93676 -2.78824 -0.29862  
H -5.11711 -1.10423 0.23654  
H -4.12563 -2.22754 -2.55008  
H -2.83564 -1.03852 -2.82650  
H -4.41891 -0.51581 -2.20136

## 1-(Z)

Si 1.06724 -0.56876 0.32203  
Si 2.82676 -1.99457 -0.72819  
Si -1.15307 -0.53373 -0.37919  
Si -2.82049 -2.01382 0.72542  
N 1.70122 0.97496 0.63531  
N 2.19920 2.38501 2.53957  
N 2.21542 3.33268 0.52287  
N -1.76716 1.07759 -0.47779  
N -1.98873 2.36170 -2.55199  
N -2.04043 3.46326 -0.61275  
C 1.99074 2.09831 1.16898  
C 2.56698 3.71934 2.68562  
C 2.58114 4.29073 1.46571  
C 1.98296 1.45050 3.68238  
C 2.87477 0.21357 3.52015  
C 0.50118 1.05502 3.75205  
C 2.36501 2.14282 5.00116  
C 2.14554 3.70069 -0.92160  
C 1.50338 2.60298 -1.77020  
C 1.27461 4.96576 -1.05716  
C 3.57076 3.98704 -1.43035  
C 0.99944 -2.59320 -2.94970  
C 1.25715 -4.35317 -1.22000  
C 3.05981 -3.98584 -2.90418  
C 4.48448 -4.23414 0.28018  
C 2.66477 -3.44882 1.80118  
C 4.71703 -2.08014 1.48714  
C 3.56773 -0.36761 -2.99395  
C 5.46339 -1.65456 -2.00501  
C 4.58133 0.35628 -0.83552  
C -1.90412 2.16293 -1.15173  
C -2.17361 3.71679 -2.81618  
C -2.21778 4.38013 -1.64426  
C -1.98517 1.31163 -3.61355  
C -3.09055 0.28684 -3.31662  
C -0.60068 0.64977 -3.70173  
C -2.29447 1.94882 -4.97973

C -2.28911 3.79859 0.81971  
C -1.24196 3.13252 1.71854  
C -3.71008 3.34044 1.18139  
C -2.18850 5.32056 1.02551  
C -1.23517 -1.88407 3.20981  
C -1.03469 -3.96029 1.90700  
C -3.10397 -3.52493 3.25236  
C -4.10129 -4.60591 0.10336  
C -2.17570 -3.97184 -1.34434  
C -4.35144 -2.83817 -1.62731  
C -5.62086 -1.77227 1.63100  
C -4.01122 -0.03974 2.43860  
C -4.84110 0.00820 0.08196  
H 2.80340 4.16818 3.64119  
H 2.83668 5.30802 1.19407  
H 2.76465 -0.45179 4.38975  
H 3.93192 0.50760 3.43604  
H 2.59862 -0.35125 2.62643  
H -0.12004 1.92892 3.99182  
H 0.34837 0.29562 4.53313  
H 0.15873 0.63381 2.80102  
H 1.74115 3.02615 5.20445  
H 3.42506 2.43929 5.02109  
H 2.20296 1.43116 5.82361  
H 0.52800 2.30740 -1.37543  
H 2.12561 1.70835 -1.82330  
H 1.36781 2.99374 -2.78902  
H 0.26907 4.76990 -0.66644  
H 1.17724 5.23515 -2.11901  
H 1.69814 5.83471 -0.53316  
H 3.53974 4.27584 -2.49258  
H 4.20343 3.09499 -1.33372  
H 4.04353 4.80853 -0.87007  
H 0.20709 -2.07950 -2.38904  
H 0.52163 -3.35698 -3.59083  
H 1.45885 -1.85201 -3.61600  
H 0.53638 -3.91245 -0.52138  
H 1.92416 -5.01001 -0.64615  
H 0.68389 -4.99608 -1.91150  
H 2.54790 -4.75299 -3.51446  
H 3.84563 -4.49959 -2.33424  
H 3.54732 -3.29639 -3.60796  
H 3.83138 -5.01046 -0.14085  
H 5.00719 -4.69022 1.14156  
H 5.25063 -3.99418 -0.47099  
H 1.93422 -4.15732 1.39152  
H 2.09723 -2.60712 2.22735  
H 3.17740 -3.95919 2.63776  
H 4.28740 -1.11627 1.78122  
H 5.60831 -1.87632 0.87817  
H 5.06582 -2.57966 2.40970  
H 3.46414 -1.16970 -3.73789  
H 4.22905 0.39981 -3.43674  
H 2.57649 0.08979 -2.86136  
H 5.28448 -2.55904 -2.60056  
H 6.02067 -1.94988 -1.10499  
H 6.13505 -1.00358 -2.59576  
H 3.71874 0.97107 -0.55987  
H 5.27955 0.97799 -1.42676  
H 5.10124 0.09110 0.09319  
H -2.24192 4.12092 -3.81712  
H -2.32666 5.44353 -1.47653  
H -4.07303 0.78168 -3.27228  
H -2.92263 -0.21510 -2.35991  
H -3.11819 -0.48090 -4.10421  
H -0.61889 -0.16670 -4.43969  
H -0.29420 0.22007 -2.73947  
H 0.15759 1.38206 -4.01460  
H -2.30672 1.15048 -5.73575  
H -1.52610 2.67515 -5.28475  
H -3.27976 2.43909 -4.99617  
H -1.47656 3.35383 2.77013

H -0.23822 3.52292 1.50252  
H -1.22796 2.04989 1.57224  
H -4.45130 3.85121 0.54638  
H -3.93567 3.56880 2.23473  
H -3.81264 2.26323 1.03304  
H -2.98843 5.87269 0.51035  
H -1.21422 5.71400 0.69939  
H -2.29047 5.53057 2.10012  
H -1.82601 -1.03084 3.56626  
H -0.37667 -1.48504 2.65507  
H -0.84481 -2.40893 4.10205  
H -0.51081 -4.36758 2.79094  
H -0.26127 -3.54215 1.24765  
H -1.50767 -4.80736 1.39222  
H -3.74672 -2.77422 3.73448  
H -2.60009 -4.08020 4.06529  
H -3.75311 -4.23889 2.72886  
H -4.99029 -4.30402 0.67491  
H -3.44058 -5.16695 0.77871  
H -4.44075 -5.31674 -0.67298  
H -2.51806 -4.69555 -2.10751  
H -1.47175 -4.50388 -0.69633  
H -1.61771 -3.18276 -1.86873  
H -4.55993 -3.60816 -2.39269  
H -3.92650 -1.97162 -2.15026  
H -5.31950 -2.54137 -1.20194  
H -6.01897 -2.35104 0.78523  
H -6.43364 -1.10191 1.96856  
H -5.41832 -2.47296 2.45135  
H -4.82275 0.67937 2.65317  
H -3.09509 0.54121 2.25470  
H -3.86004 -0.63214 3.35175  
H -5.23570 -0.54317 -0.77958  
H -4.02162 0.64282 -0.27174  
H -5.65367 0.66802 0.43900  
C -3.38556 -3.41468 -0.57172  
C -4.39403 -0.92266 1.23190  
C -2.03732 -2.87528 2.34295  
C 3.70479 -2.98795 0.75625  
C 2.01903 -3.27378 -2.01134  
C 4.17061 -0.87797 -1.66666

## 2-(Z)

Si 0.59845 -1.13680 0.08920  
Si 0.59821 1.13690 -0.08925  
Si 2.10566 2.48030 1.22038  
Si 2.10624 -2.47987 -1.22037  
N -3.23332 -2.34261 -0.42442  
N -0.90941 -1.90840 -0.06686  
N -0.90979 1.90823 0.06678  
N -2.38513 2.98673 -1.53164  
N -2.38445 -2.98718 1.53164  
N -3.23378 2.34193 0.42445  
C -4.79327 -2.04912 -2.31826  
H -5.07893 -3.11216 -2.33019  
H -4.86365 -1.67426 -3.34968  
H -5.52246 -1.48884 -1.71290  
C -3.35486 -1.84173 -1.82119  
C -2.04154 -2.35905 0.31780  
C -2.04205 2.35862 -0.31783  
C -1.42928 3.38223 -2.60551  
C -2.17878 4.15436 -3.70364  
H -2.95776 3.54015 -4.18079  
H -1.45767 4.43778 -4.48391  
H -2.63609 5.07971 -3.32181  
C -0.79371 2.13711 -3.24882  
H -0.25229 1.52264 -2.51665  
H -0.07470 2.44482 -4.02372  
H -1.56312 1.51003 -3.72178  
C 1.14701 4.08995 1.57591

H 0.09767 3.88538 1.82639  
H 1.15114 4.75174 0.69665  
H 1.60546 4.64339 2.41150  
C 2.48309 1.65365 2.95644  
C 3.40705 2.54099 3.81353  
H 3.03197 3.57210 3.91648  
H 4.42618 2.59138 3.40056  
H 3.49337 2.12233 4.83354  
C 3.11864 0.25940 2.82563  
H 3.21205 -0.21337 3.82107  
H 4.12749 0.29613 2.38957  
H 2.49868 -0.40431 2.20213  
C 1.12924 1.49904 3.68273  
H 1.28034 1.01541 4.66578  
H 0.43078 0.86913 3.10880  
H 0.64058 2.46876 3.86650  
C 3.68165 3.02514 0.19982  
C 4.38450 4.22511 0.86890  
H 4.78018 3.98127 1.86509  
H 3.71259 5.09123 0.97830  
H 5.24051 4.55267 0.24971  
C 4.68676 1.87302 0.04374  
H 5.52467 2.17655 -0.61131  
H 4.22251 0.98820 -0.41323  
H 5.12210 1.56727 1.00726  
C 3.22751 3.47006 -1.20687  
H 4.10269 3.79195 -1.80143  
H 2.53161 4.32257 -1.16914  
H 2.73211 2.65784 -1.76118  
C 2.48350 -1.65320 -2.95647  
C 1.12965 -1.49919 -3.68289  
H 1.28064 -1.01555 -4.66595  
H 0.43090 -0.86954 -3.10904  
H 0.64139 -2.46911 -3.86665  
C 3.40790 -2.54024 -3.81339  
H 3.03323 -3.57150 -3.91630  
H 4.42701 -2.59019 -3.40033  
H 3.49414 -2.12163 -4.83344  
C 3.11847 -0.25869 -2.82574  
H 3.21181 0.21400 -3.82123  
H 4.12729 -0.29497 -2.38956  
H 2.49817 0.40487 -2.20241  
C 1.14798 -4.08976 -1.57581  
H 1.60656 -4.64315 -2.41136  
H 0.09859 -3.88546 -1.82631  
H 1.15226 -4.75150 -0.69651  
C 3.68238 -3.02433 -0.19980  
C 4.38540 -4.22424 -0.86883  
H 4.78093 -3.98046 -1.86509  
H 3.71365 -5.09050 -0.97805  
H 5.24153 -4.55156 -0.24968  
C 4.68732 -1.87203 -0.04386  
H 5.52532 -2.17541 0.61114  
H 4.22297 -0.98725 0.41310  
H 5.12254 -1.56627 -1.00743  
C 3.22840 -3.46923 1.20694  
H 4.10366 -3.79095 1.80146  
H 2.53261 -4.32184 1.16931  
H 2.73292 -2.65703 1.76122  
C -2.39528 -2.63081 -2.72822  
H -1.35899 -2.47277 -2.41347  
H -2.49892 -2.29308 -3.77092  
H -2.61885 -3.70839 -2.68551  
C -3.03055 -0.34197 -1.86368  
H -3.73546 0.23047 -1.24439  
H -3.11099 0.02570 -2.89701  
H -2.01588 -0.14681 -1.50187  
C -4.25328 -2.92529 0.32203  
H -5.27266 -3.01106 -0.03177  
C -3.73874 -3.31770 1.50773  
H -4.24672 -3.79459 2.33574  
C -1.42849 -3.38243 2.60550

C -0.35807 -4.31097 2.00604  
H -0.82768 -5.21295 1.58344  
H 0.35709 -4.61888 2.78370  
H 0.19750 -3.80990 1.20819  
C -2.17787 -4.15426 3.70393  
H -2.95673 -3.53989 4.18105  
H -1.45665 -4.43753 4.48415  
H -2.63528 -5.07967 3.32238  
C -0.79281 -2.13715 3.24841  
H -0.25146 -1.52289 2.51601  
H -0.07371 -2.44468 4.02330  
H -1.56214 -1.50993 3.72130  
C -3.35516 1.84093 1.82119  
H -4.79351 2.04829 2.31844  
H -5.07915 3.11134 2.33051  
H -4.86378 1.67334 3.34983  
H -5.52278 1.48809 1.71311  
C -2.39546 2.62993 2.72816  
H -1.35921 2.47191 2.41328  
H -2.49898 2.29212 3.77085  
H -2.61903 3.70752 2.68555  
C -3.03086 0.34116 1.86352  
H -3.73586 -0.23121 1.24426  
H -3.11119 -0.02658 2.89683  
H -2.01624 0.14602 1.50157  
C -4.25387 2.92452 -0.32190  
H -5.27323 3.01014 0.03198  
C -3.73946 3.31709 -1.50760  
H -4.24756 3.79395 -2.33555  
C -0.35877 4.31059 -2.00594  
H -0.82831 5.21247 -1.58305  
H 0.35628 4.61870 -2.78362  
H 0.19690 3.80931 -1.20830

## 2<sup>M</sup>

Si -0.44834 -0.00218 1.50966  
Si -2.19936 -0.00860 -0.21346  
N 2.99191 -1.08491 -0.03526  
N 0.90946 -0.00850 0.51123  
N 2.94693 1.14431 -0.04646  
C 3.75444 -3.41288 -0.36241  
H 4.11596 -3.21458 -1.38276  
H 3.42198 -4.46039 -0.32653  
H 4.59367 -3.30673 0.34196  
C 2.56839 -2.51122 0.01444  
C 2.15612 0.01435 0.19173  
C -3.21190 -1.67714 -0.04803  
C -2.29863 -2.81930 -0.54112  
H -2.82098 -3.79081 -0.45717  
H -1.37623 -2.89665 0.05778  
H -2.00204 -2.69591 -1.59483  
C -4.49291 -1.66846 -0.90250  
H -4.28875 -1.43292 -1.95998  
H -5.22932 -0.93863 -0.53223  
H -4.98053 -2.66168 -0.87681  
C -3.58728 -1.97139 1.41898  
H -4.10965 -2.94410 1.49171  
H -4.25675 -1.21019 1.84484  
H -2.69964 -2.02964 2.07091  
C -1.50091 0.06123 -1.98735  
H -2.25419 -0.22793 -2.73918  
H -0.63157 -0.60452 -2.09604  
H -1.16113 1.08020 -2.23070  
C -3.28650 1.60366 0.02123  
C -4.18250 1.87664 -1.20308  
H -4.91788 1.07635 -1.37221  
H -3.59290 1.98765 -2.12730  
H -4.74869 2.81718 -1.06193  
C -4.16245 1.51550 1.28444  
H -4.67246 2.48011 1.46756

H -3.57097 1.28055 2.18515  
H -4.94729 0.74933 1.18922  
C -2.32084 2.79813 0.18130  
H -2.88963 3.74008 0.29642  
H -1.66307 2.92226 -0.69312  
H -1.67749 2.70137 1.07330  
C 1.43750 -2.73682 -1.00499  
H 0.58502 -2.08155 -0.80042  
H 1.09176 -3.78094 -0.96420  
H 1.79621 -2.52832 -2.02515  
C 2.12293 -2.87193 1.44413  
H 2.94560 -2.69792 2.15513  
H 1.84169 -3.93549 1.49189  
H 1.26256 -2.27413 1.76710  
C 4.25566 -0.62121 -0.40365  
H 5.08587 -1.28108 -0.61946  
C 4.22845 0.72833 -0.41025  
H 5.03159 1.41891 -0.63235  
C 2.46557 2.55277 -0.01236  
C 1.31652 2.71774 -1.02346  
H 1.67453 2.51197 -2.04435  
H 0.92840 3.74717 -0.99051  
H 0.49578 2.02800 -0.80333  
C 3.60974 3.49673 -0.41441  
H 4.45860 3.43779 0.28393  
H 3.23395 4.52988 -0.39252  
H 3.97068 3.29648 -1.43459  
C 2.01993 2.91567 1.41667  
H 1.18968 2.28631 1.75838  
H 1.69258 3.96640 1.45199  
H 2.85684 2.78824 2.12090

## 2-(E)

Si 0.05228 3.02412 0.41630  
Si 0.73796 0.82650 -0.22483  
N 4.34729 -0.18464 -1.10511  
N 4.13357 -0.83346 1.01404  
N 2.38263 0.54533 0.08051  
C 3.48726 -0.09550 0.00578  
C 5.47297 -0.92823 -0.76297  
H 6.27742 -1.14056 -1.45519  
C 4.11197 0.45857 -2.42852  
C 3.79012 -0.94141 2.46201  
C 2.27938 3.31341 2.24493  
H 2.58716 2.31773 1.89541  
H 2.63669 3.44232 3.28405  
H 2.81110 4.05066 1.62606  
C 4.64045 0.08333 3.23649  
H 5.71648 -0.09814 3.08749  
H 4.42612 0.02314 4.31515  
H 4.41063 1.10413 2.89681  
C 0.08346 2.55124 3.20207  
H 0.19815 1.49040 2.92933  
H -0.99611 2.74796 3.29607  
H 0.53105 2.69435 4.20304  
C 0.29417 3.70197 -2.35899  
H 0.45460 4.45500 -3.15354  
H -0.71730 3.28925 -2.50096  
H 1.00907 2.88201 -2.52980  
C 1.90628 4.88983 -0.85507  
H 2.13542 5.54892 -1.71335  
H 2.65794 4.08714 -0.85002  
H 2.05124 5.48751 0.05728  
C -0.51246 5.53890 -0.87686  
H -0.26037 6.29678 -1.64219  
H -0.47864 6.04064 0.10204  
H -1.55391 5.22976 -1.05776  
C 0.39701 4.94679 2.56858  
H 0.89904 5.68632 1.92638  
H 0.71858 5.14991 3.60751

H -0.68740 5.13998 2.52157  
C 5.34619 -1.31489 0.52341  
H 6.02875 -1.90271 1.12491  
C 0.46830 4.34978 -0.96973  
C 3.95793 1.97581 -2.23197  
H 4.87910 2.40437 -1.80681  
H 3.13216 2.19327 -1.54862  
H 3.75688 2.46743 -3.19602  
C 0.74931 3.49757 2.17978  
C 2.86531 -0.15151 -3.09311  
H 2.68936 0.32470 -4.07024  
H 1.96322 -0.01293 -2.48210  
H 3.00819 -1.23013 -3.25807  
C 2.30307 -0.68360 2.73322  
H 2.03464 0.36404 2.58445  
H 2.08850 -0.94976 3.77944  
H 1.65197 -1.28382 2.08714  
C 5.31879 0.20777 -3.34692  
H 5.13213 0.70461 -4.31006  
H 5.46806 -0.86349 -3.55113  
H 6.24834 0.62623 -2.93170  
C -1.84361 2.98914 0.56297  
H -2.22025 3.93583 0.98270  
H -2.17408 2.17126 1.21517  
H -2.32605 2.84001 -0.41302  
C 4.11453 -2.37202 2.93835  
H 5.18621 -2.61137 2.88148  
H 3.56112 -3.11600 2.34556  
H 3.81561 -2.48065 3.99120  
Si -0.05228 -3.02409 -0.41618  
Si -0.73795 -0.82647 0.22501  
N -4.34747 0.18455 1.10491  
N -4.13354 0.83338 -1.01421  
N -2.38257 -0.54520 -0.08045  
C -3.48728 0.09548 -0.00586  
C -5.47320 0.92800 0.76261  
H -6.27775 1.14025 1.45473  
C -4.11227 -0.45860 2.42837  
C -3.78988 0.94147 -2.46212  
C -2.27953 -3.31368 -2.24456  
H -2.58745 -2.31807 -1.89497  
H -2.63695 -3.44263 -3.28363  
H -2.81105 -4.05104 -1.62563  
C -4.64004 -0.08325 -3.23681  
H -5.71611 0.09813 -3.08795  
H -4.42556 -0.02295 -4.31543  
H -4.41020 -1.10407 -2.89718  
C -0.08386 -2.55107 -3.20192  
H -0.19873 -1.49027 -2.92912  
H 0.99573 -2.74759 -3.29605  
H -0.53154 -2.69423 -4.20285  
C -0.29409 -3.70194 2.35914  
H -0.45443 -4.45499 3.15369  
H 0.71731 -3.28907 2.50114  
H -1.00912 -2.88209 2.52991  
C -1.90596 -4.89013 0.85521  
H -2.13499 -5.54922 1.71351  
H -2.65777 -4.08759 0.85010  
H -2.05078 -5.48788 -0.05711  
C 0.51290 -5.53874 0.87704  
H 0.26094 -6.29666 1.64238  
H 0.47918 -6.04051 -0.10185  
H 1.55429 -5.22940 1.05795  
C -0.39692 -4.94671 -2.56851  
H -0.89876 -5.68637 -1.92630  
H -0.71857 -5.14983 -3.60742  
H 0.68753 -5.13972 -2.52163  
C -5.34628 1.31467 -0.52375  
H -6.02881 1.90244 -1.12534  
C -0.46808 -4.34980 0.96988  
C -3.95815 -1.97585 2.23190  
H -4.87925 -2.40446 1.80666

H -3.13229 -2.19329 1.54865  
H -3.75719 -2.46742 3.19599  
C -0.74942 -3.49757 -2.17959  
C -2.86570 0.15155 3.09308  
H -2.68987 -0.32459 4.07026  
H -1.96353 0.01294 2.48220  
H -3.00862 1.23018 3.25794  
C -2.30279 0.68378 -2.73316  
H -2.03430 -0.36385 -2.58439  
H -2.08812 0.94997 -3.77936  
H -1.65179 1.28401 -2.08701  
C -5.31920 -0.20782 3.34662  
H -5.13263 -0.70461 4.30981  
H -5.46853 0.86345 3.55077  
H -6.24868 -0.62633 2.93131  
C 1.84360 -2.98899 -0.56302  
H 2.22027 -3.93565 -0.98279  
H 2.17396 -2.17108 -1.21524  
H 2.32613 -2.83984 0.41293  
C -4.11432 2.37210 -2.93837  
H -5.18600 2.61142 -2.88153  
H -3.56097 3.11606 -2.34550  
H -3.81535 2.48083 -3.99120

## VI-(Z)

Si 1.05832 -0.23598 0.41858  
Si 2.54892 -1.83172 -0.60475  
Si 1.56272 -3.10937 -2.35667  
Si 3.46287 -3.19529 1.14187  
Si 4.38169 -0.75581 -1.71373  
Si -1.14468 -0.07580 -0.29496  
Si -2.73315 -1.64269 0.62197  
Si -1.78921 -3.04231 2.30399  
Si -3.70425 -2.89207 -1.17851  
Si -4.51589 -0.54854 1.77502  
N 1.92737 1.20788 0.46697  
N 2.99495 2.75720 1.95478  
N 2.45921 3.49819 -0.07730  
N -1.82715 1.48366 -0.23877  
N -2.62893 2.97674 -1.97668  
N -2.08962 3.85785 -0.00018  
C 2.39749 2.35804 0.74326  
C 3.40954 4.08228 1.85132  
C 3.08638 4.53036 0.62005  
C 3.23672 1.86471 3.12378  
C 4.17629 0.72129 2.70109  
C 1.90259 1.32585 3.67143  
C 3.92198 2.66355 4.24435  
C 2.06857 3.66780 -1.50654  
C 1.25974 2.48332 -2.04112  
C 1.18692 4.92713 -1.62701  
C 3.35407 3.82262 -2.34231  
C 0.72546 -1.94270 -3.59555  
C 0.27110 -4.35832 -1.75467  
C 2.89121 -4.10080 -3.29121  
C 3.22851 -5.04404 0.77253  
C 2.65275 -2.80867 2.81329  
C 5.32578 -2.90013 1.38373  
C 3.87244 -0.05969 -3.41056  
C 5.77121 -2.00753 -2.08198  
C 5.20235 0.64651 -0.73482  
C -2.13835 2.63741 -0.69978  
C -2.85888 4.35082 -2.02791  
C -2.53844 4.88274 -0.82945  
C -2.99871 2.01474 -3.05573  
C -4.05628 1.03222 -2.52232  
C -1.74666 1.28381 -3.56712  
C -3.61661 2.78014 -4.23803  
C -1.82652 3.99749 1.46241  
C -0.42008 3.48822 1.79964

C -2.88677 3.19944 2.23337  
C -1.91554 5.47777 1.86249  
C -0.91710 -2.00015 3.62800  
C -0.53567 -4.28356 1.61367  
C -3.14409 -4.05151 3.18017  
C -3.65331 -4.76016 -0.83710  
C -2.82358 -2.56553 -2.82633  
C -5.52520 -2.42028 -1.46034  
C -5.95583 -1.73926 2.14348  
C -3.91871 0.06414 3.47596  
C -5.27415 0.89791 0.80725  
H 3.89778 4.61546 2.65679  
H 3.25476 5.50882 0.18524  
H 4.36096 0.04784 3.55139  
H 5.14121 1.12872 2.36456  
H 3.74847 0.13656 1.87966  
H 1.26219 2.15531 4.00607  
H 2.09352 0.66750 4.53275  
H 1.35056 0.74777 2.92084  
H 3.29925 3.50268 4.59062  
H 4.90547 3.05040 3.93716  
H 4.08361 1.99416 5.10159  
H 0.34312 2.32476 -1.46504  
H 1.82885 1.55085 -2.02510  
H 0.98342 2.70596 -3.08178  
H 0.27037 4.81037 -1.03151  
H 0.89031 5.07056 -2.67686  
H 1.70487 5.84207 -1.30348  
H 3.10165 3.97136 -3.40359  
H 3.97548 2.91918 -2.26016  
H 3.95388 4.68425 -2.01115  
H 0.01286 -1.28518 -3.07551  
H 0.17579 -2.52143 -4.35712  
H 1.45873 -1.30629 -4.11128  
H -0.53126 -3.86554 -1.18982  
H 0.71857 -5.12706 -1.10761  
H -0.18451 -4.86402 -2.62315  
H 2.40778 -4.74870 -4.04288  
H 3.47341 -4.74646 -2.61421  
H 3.59543 -3.44078 -3.82120  
H 2.16200 -5.31534 0.74928  
H 3.71626 -5.65290 1.55330  
H 3.67203 -5.31881 -0.19819  
H 1.57435 -3.00634 2.80772  
H 2.79248 -1.75371 3.09118  
H 3.11309 -3.43331 3.59865  
H 5.56443 -1.82898 1.47858  
H 5.91556 -3.31022 0.55065  
H 5.65361 -3.40272 2.31012  
H 3.68990 -0.87714 -4.12564  
H 4.69991 0.55259 -3.80917  
H 2.97091 0.56737 -3.37748  
H 5.39233 -2.98516 -2.41465  
H 6.40323 -2.17005 -1.19674  
H 6.41522 -1.60426 -2.88294  
H 4.49076 1.43079 -0.44703  
H 5.99480 1.10092 -1.35454  
H 5.67242 0.26219 0.18241  
H -3.21368 4.85917 -2.91472  
H -2.57029 5.92041 -0.52367  
H -4.94795 1.58069 -2.18454  
H -3.68080 0.44870 -1.67555  
H -4.35733 0.33372 -3.31682  
H -2.02359 0.56787 -4.35572  
H -1.24026 0.72411 -2.76952  
H -1.02952 2.00284 -3.98909  
H -3.88079 2.05469 -5.02090  
H -2.90963 3.49888 -4.67969  
H -4.53720 3.31141 -3.95289  
H -0.25557 3.55797 2.88492  
H 0.34569 4.09699 1.30135  
H -0.28880 2.44516 1.49566

H -3.89925 3.56155 1.99764  
H -2.72409 3.29544 3.31768  
H -2.82292 2.14090 1.96522  
H -2.92171 5.89436 1.70357  
H -1.18151 6.09345 1.31982  
H -1.68915 5.56129 2.93535  
H -1.63329 -1.39857 4.20569  
H -0.18784 -1.31639 3.16706  
H -0.38025 -2.66017 4.33051  
H -0.06446 -4.83675 2.44367  
H 0.25906 -3.77797 1.04854  
H -1.01446 -5.01429 0.94577  
H -3.81487 -3.40336 3.76550  
H -2.67595 -4.76634 3.87902  
H -3.75886 -4.62732 2.47029  
H -4.15730 -5.01028 0.11029  
H -2.61788 -5.13006 -0.78077  
H -4.16395 -5.30770 -1.64805  
H -3.36932 -3.07352 -3.64048  
H -1.79226 -2.93716 -2.82500  
H -2.78585 -1.49145 -3.05714  
H -5.88281 -2.89690 -2.38944  
H -5.65573 -1.33221 -1.56731  
H -6.16938 -2.76264 -0.63710  
H -6.55878 -1.93480 1.24477  
H -6.61871 -1.27648 2.89566  
H -5.61571 -2.70572 2.54393  
H -4.62382 0.81388 3.87403  
H -2.91740 0.51597 3.44854  
H -3.88924 -0.77817 4.18573  
H -5.84371 0.52274 -0.05685  
H -4.51305 1.59599 0.43683  
H -5.97278 1.45150 1.45813

## VI<sup>M</sup>

Si 0.11660 0.08250 -1.78402  
Si -1.68449 0.02313 -0.10458  
Si -3.17587 -1.60761 -0.95576  
Si -2.80517 2.10702 -0.27770  
Si -1.29873 -0.47036 2.18098  
N 1.51134 0.04103 -0.86059  
N 3.51042 1.07912 -0.02567  
N 3.43752 -1.14849 -0.06138  
C 2.69777 -0.00374 -0.37344  
C 4.71495 0.59175 0.48346  
C 4.67150 -0.75769 0.46074  
C 3.15788 2.51220 -0.22142  
C 1.89304 2.84525 0.58952  
C 2.95765 2.79125 -1.72327  
C 4.30702 3.39613 0.28799  
C 2.98915 -2.54842 -0.29703  
C 2.79440 -2.77889 -1.80754  
C 4.06374 -3.52229 0.21084  
C 1.69003 -2.80782 0.48590  
C -2.22451 -3.23832 -1.19066  
C -3.85784 -1.06490 -2.64333  
C -4.64471 -1.93162 0.20600  
C -4.61306 1.98801 0.29497  
C -2.79286 2.70276 -2.08171  
C -1.93898 3.43389 0.77332  
C -1.33523 -2.34285 2.51686  
C -2.66441 0.28473 3.26979  
C 0.37472 0.21683 2.75616  
H 5.51137 1.23644 0.83188  
H 5.42458 -1.46401 0.78525  
H 1.60946 3.89636 0.42736  
H 2.08010 2.69848 1.66380  
H 1.04991 2.20713 0.30353  
H 3.87595 2.54993 -2.28123  
H 2.72770 3.85673 -1.87890

H 2.13617 2.19788 -2.14207  
H 5.23865 3.22724 -0.27320  
H 4.50126 3.24047 1.36009  
H 4.02454 4.45003 0.15176  
H 3.73851 -2.59967 -2.34546  
H 2.03010 -2.11236 -2.22497  
H 2.48233 -3.81867 -1.99143  
H 5.01456 -3.40897 -0.33177  
H 3.70991 -4.55039 0.04718  
H 4.25004 -3.40213 1.28894  
H 1.34643 -3.83976 0.31668  
H 0.89086 -2.12463 0.18010  
H 1.86102 -2.67148 1.56453  
H -1.38622 -3.10342 -1.89487  
H -2.88142 -4.02920 -1.59238  
H -1.80748 -3.59371 -0.23466  
H -3.04046 -0.81522 -3.33939  
H -4.49894 -0.17394 -2.54330  
H -4.46352 -1.86792 -3.09791  
H -5.31731 -2.69434 -0.22380  
H -5.23048 -1.01371 0.37102  
H -4.30837 -2.29479 1.19012  
H -5.19030 1.31391 -0.35825  
H -5.09354 2.98152 0.26489  
H -4.68412 1.60408 1.32490  
H -3.27560 1.97136 -2.74896  
H -1.76273 2.85132 -2.44571  
H -3.33094 3.66187 -2.17783  
H -0.91311 3.61267 0.41585  
H -1.87765 3.14237 1.83406  
H -2.49038 4.38836 0.71559  
H -2.33340 -2.75938 2.30886  
H -1.10541 -2.53674 3.57897  
H -0.60775 -2.89655 1.90660  
H -3.65229 -0.11522 2.98827  
H -2.70704 1.38128 3.17533  
H -2.49004 0.04233 4.33269  
H 1.19604 -0.15526 2.12439  
H 0.57820 -0.07133 3.80193  
H 0.38137 1.31637 2.69742

## VI(-E)

Si 1.02228 0.07008 -0.27891  
N 2.00523 1.24443 0.42263  
C 2.88265 1.94116 1.03231  
Si 2.35206 -1.92462 -0.65089  
N 3.04571 2.07490 2.42650  
C 4.10423 2.93739 2.69110  
H 4.42812 3.19054 3.69204  
C 4.61740 3.34815 1.51382  
H 5.44645 4.02123 1.33011  
N 3.89781 2.74592 0.48342  
C 2.18109 1.44622 3.46471  
C 0.73303 1.92266 3.28295  
H 0.10177 1.52324 4.09187  
H 0.30897 1.57202 2.33323  
H 0.68080 3.02094 3.31083  
C 2.28149 -0.08444 3.36962  
H 3.30809 -0.41713 3.57935  
H 1.99671 -0.44320 2.37470  
H 1.61058 -0.54915 4.10678  
C 2.66086 1.87455 4.86124  
H 3.69701 1.55990 5.05922  
H 2.01972 1.38942 5.61140  
H 2.58037 2.96205 5.01053  
C 5.68544 2.90497 -1.19473  
H 5.90968 3.10212 -2.25378  
H 5.98189 1.87176 -0.96386  
H 6.31090 3.58345 -0.59627  
C 4.17835 3.10737 -0.93626

C 3.79035 4.58419 -1.14361  
H 4.36321 5.25213 -0.48226  
H 2.72083 4.72777 -0.93235  
H 3.98540 4.88608 -2.18435  
C 3.39277 2.24808 -1.93008  
H 3.71225 2.51645 -2.94845  
H 2.31777 2.42343 -1.85185  
H 3.57358 1.17845 -1.78317  
C 5.21127 -0.70783 1.21421  
H 6.31124 -0.71397 1.30563  
H 4.79282 -1.14566 2.13271  
H 4.87987 0.33797 1.15458  
C 5.60412 -0.97800 -1.81682  
H 6.67915 -0.88141 -1.58576  
H 5.23021 0.01537 -2.09771  
H 5.50919 -1.63177 -2.69744  
C 5.47110 -3.44801 -0.08478  
H 6.56681 -3.35482 0.01307  
H 5.26237 -4.09659 -0.95010  
H 5.09412 -3.95233 0.81872  
C -0.24057 -4.07417 0.34338  
H -0.76195 -3.12043 0.48710  
H -0.63350 -4.80696 1.06848  
H -0.48367 -4.43698 -0.66775  
C 2.39297 -5.47077 -0.18475  
H 3.49192 -5.47223 -0.16887  
H 2.06572 -5.63941 -1.22322  
H 2.04155 -6.32710 0.41754  
C 2.12181 -3.72963 2.33786  
H 3.21716 -3.68141 2.45100  
H 1.76009 -4.60456 2.90512  
H 1.69804 -2.82476 2.79630  
C 2.49990 -0.74411 -3.96855  
H 3.54304 -0.42042 -3.83573  
H 1.84435 0.08242 -3.65035  
H 2.33028 -0.91812 -5.04525  
C 3.27345 -3.70677 -3.57279  
H 4.33025 -3.46949 -3.37325  
H 3.16182 -3.85978 -4.66021  
H 3.04666 -4.66027 -3.07076  
C 0.33207 -2.81082 -3.40941  
H 0.23122 -2.99830 -4.49228  
H -0.35320 -1.99261 -3.14224  
H 0.00523 -3.71519 -2.87292  
Si -1.18254 0.21639 0.45131  
N -2.17649 -1.14976 0.45392  
C -2.95948 -2.04642 0.91547  
Si -2.32642 2.05556 -0.62188  
N -3.20071 -2.39202 2.26222  
C -4.12651 -3.43169 2.31344  
H -4.48122 -3.86649 3.23851  
C -4.47124 -3.75217 1.04933  
H -5.16868 -4.50626 0.70273  
N -3.77372 -2.91995 0.17883  
C -2.50257 -1.82186 3.45045  
C -0.98812 -2.05766 3.32349  
H -0.48153 -1.71477 4.23833  
H -0.55498 -1.51080 2.47689  
H -0.77735 -3.12849 3.19185  
C -2.83157 -0.32590 3.59405  
H -3.91381 -0.18199 3.72765  
H -2.51075 0.24942 2.71649  
H -2.31238 0.08850 4.47209  
C -2.98958 -2.53746 4.72227  
H -4.07028 -2.40569 4.88395  
H -2.47153 -2.09972 5.58770  
H -2.75702 -3.61301 4.70591  
C -5.47485 -2.70582 -1.57588  
H -5.66190 -2.70868 -2.66054  
H -5.74815 -1.71741 -1.18017  
H -6.14127 -3.45298 -1.11898  
C -3.98910 -3.00670 -1.29342

C -3.63364 -4.43429 -1.75260  
H -4.26000 -5.19709 -1.26611  
H -2.58175 -4.65667 -1.52304  
H -3.78022 -4.52505 -2.83967  
C -3.11781 -2.01787 -2.07350  
H -3.32434 -2.15062 -3.14634  
H -2.05275 -2.19610 -1.89872  
H -3.32477 -0.97876 -1.80415  
C -5.23709 0.72042 1.00846  
H -6.33909 0.69463 1.06488  
H -4.85671 1.11730 1.96203  
H -4.87209 -0.31113 0.90511  
C -5.46661 1.12241 -2.03505  
H -6.55259 0.98811 -1.89021  
H -5.04279 0.15268 -2.32818  
H -5.32437 1.81713 -2.87739  
C -5.52052 3.51261 -0.18100  
H -6.61718 3.38874 -0.15499  
H -5.27727 4.20852 -0.99944  
H -5.21108 3.98002 0.76712  
C 0.16037 4.27199 0.50672  
H 0.71522 3.33040 0.60737  
H 0.49986 4.97063 1.29048  
H 0.41985 4.71041 -0.47054  
C -2.50043 5.60755 -0.05422  
H -3.59918 5.58845 -0.02880  
H -2.18716 5.80934 -1.09122  
H -2.15966 6.45476 0.56658  
C -2.26571 3.75276 2.39560  
H -3.36585 3.72913 2.46435  
H -1.90186 4.56969 3.04230  
H -1.88498 2.80088 2.79589  
C -2.19999 0.82766 -3.95328  
H -3.25528 0.51951 -3.92085  
H -1.58755 -0.00923 -3.58368  
H -1.92784 1.01083 -5.00711  
C -2.95500 3.80187 -3.60680  
H -4.02939 3.60361 -3.46685  
H -2.77441 3.93653 -4.68747  
H -2.72462 4.75473 -3.10440  
C -0.05899 2.84771 -3.20110  
H 0.14870 2.99494 -4.27476  
H 0.57429 2.02387 -2.83853  
H 0.23135 3.76341 -2.66313  
Si 2.11263 -2.32072 -2.98294  
Si 4.71013 -1.71843 -0.30846  
Si 1.63370 -3.87059 0.50697  
Si -1.87427 2.38939 -2.92694  
Si -4.69649 1.81836 -0.43987  
Si -1.71503 4.00197 0.59256

## 9

Si 0.67119 0.05210 0.01991  
Si -1.48825 -0.33036 0.46372  
C 2.57923 -2.14240 0.41574  
N 1.81781 -1.13235 0.23850  
C 3.68262 -3.90731 1.32957  
H 3.96074 -4.65086 2.06506  
N 2.75736 -2.89626 1.58201  
Si -2.66937 1.72441 0.73315  
C -1.46980 3.20188 0.61723  
H -0.51414 2.98967 1.10877  
H -1.91505 4.08619 1.10222  
H -1.25280 3.46092 -0.42704  
C -4.12264 2.13856 -0.51485  
C -3.57386 1.99612 -1.94725  
H -2.79886 2.74644 -2.16242  
H -4.38383 2.14225 -2.68612  
H -3.13152 1.00801 -2.12488  
C -4.62253 3.59056 -0.35867

H -5.09777 3.77746 0.61339  
H -5.37796 3.80965 -1.13681  
H -3.80974 4.32388 -0.48238  
C -5.31028 1.17812 -0.33367  
H -5.00737 0.12587 -0.42657  
H -6.08247 1.36746 -1.10281  
H -5.79366 1.29947 0.64841  
C 4.09795 -3.79654 0.04837  
H 4.78827 -4.42943 -0.49456  
N 3.44075 -2.71248 -0.52858  
C 0.63553 -2.75742 2.87096  
H 0.36869 -3.78895 2.59676  
H 0.16361 -2.06762 2.15931  
H 0.20757 -2.54749 3.86341  
C 2.54338 -1.15776 3.33139  
H 2.15295 -0.94375 4.33796  
H 2.12615 -0.41971 2.63988  
H 3.63804 -1.03888 3.34808  
C 2.16061 -2.58978 2.91882  
C 4.35887 -0.68095 -1.58168  
H 5.26047 -0.74974 -0.95270  
H 3.62934 -0.03780 -1.07541  
H 4.63637 -0.20803 -2.53592  
C 2.54190 -2.03198 -2.74234  
H 2.16360 -3.04592 -2.94163  
H 2.79814 -1.56128 -3.70357  
H 1.73806 -1.45094 -2.28046  
C 4.85401 -2.93593 -2.54450  
H 4.50154 -3.96027 -2.74036  
H 5.79110 -2.98386 -1.96968  
H 5.08363 -2.47265 -3.51503  
C 3.78480 -2.08791 -1.83855  
C 2.72947 -3.56411 3.96282  
H 2.46760 -4.60901 3.73714  
H 2.29064 -3.32019 4.94090  
H 3.82311 -3.48037 4.05737  
C -3.24356 1.69530 2.61963  
C -1.97387 1.78662 3.49435  
H -2.24405 1.69979 4.56364  
H -1.45048 2.74739 3.36819  
H -1.26186 0.97774 3.26235  
C -4.15480 2.88761 2.96816  
H -4.33747 2.91849 4.05885  
H -5.13901 2.81166 2.48136  
H -3.71176 3.85676 2.68643  
C -3.97927 0.39357 2.98764  
H -3.34324 -0.48975 2.81910  
H -4.90804 0.25837 2.41273  
H -4.25713 0.40140 4.05856  
C 1.85076 2.70811 -0.38306  
N 1.40680 1.52114 -0.22500  
C 2.43854 4.70550 -1.29254  
H 2.52749 5.48742 -2.03574  
N 1.85465 3.46763 -1.55634  
Si -1.98051 -2.32593 -0.72937  
C -0.42618 -3.43120 -0.67709  
H 0.34234 -3.07152 -1.37248  
H -0.69528 -4.45838 -0.97212  
H 0.02435 -3.46945 0.32051  
C -3.35478 -3.32684 0.24959  
C -2.76201 -3.70395 1.62441  
H -1.90545 -4.39013 1.53052  
H -3.52548 -4.21494 2.24035  
H -2.41950 -2.81599 2.17953  
C -3.75178 -4.62629 -0.47778  
H -4.27280 -4.42963 -1.42699  
H -4.44283 -5.21669 0.15281  
H -2.88392 -5.26956 -0.69559  
C -4.62260 -2.48811 0.48660  
H -4.39810 -1.55730 1.02474  
H -5.34757 -3.05267 1.10280  
H -5.13174 -2.22245 -0.45114

C 2.80585 4.73311 0.00818  
H 3.26043 5.54308 0.56428  
N 2.45957 3.51227 0.58468  
C -0.09647 2.65766 -2.85063  
H -0.67429 3.56975 -2.64019  
H -0.33152 1.91156 -2.08259  
H -0.42541 2.26060 -3.82289  
C 2.22498 1.74080 -3.28809  
H 1.92723 1.39861 -4.29100  
H 2.06442 0.91938 -2.58375  
H 3.30014 1.97802 -3.30398  
C 1.40446 2.98101 -2.89365  
C 3.87128 1.84825 1.73335  
H 4.74561 2.17157 1.14655  
H 3.39103 1.01255 1.21084  
H 4.22332 1.48806 2.71185  
C 1.67820 2.61701 2.77006  
H 1.00728 3.47569 2.92054  
H 2.01102 2.26099 3.75685  
H 1.10290 1.81446 2.29752  
C 3.63085 4.15887 2.66204  
H 2.98359 5.03666 2.81190  
H 4.54380 4.47334 2.13418  
H 3.93117 3.79450 3.65510  
C 2.89746 3.02673 1.92644  
C 1.64111 4.07842 -3.94228  
H 1.07102 4.99257 -3.71702  
H 1.29767 3.70776 -4.91884  
H 2.70702 4.33573 -4.03924  
C -2.38024 -2.14665 -2.65022  
C -1.43580 -1.09223 -3.26063  
H -1.61646 -1.00117 -4.34857  
H -0.37655 -1.36557 -3.12664  
H -1.56722 -0.10088 -2.80691  
C -2.12470 -3.47734 -3.39237  
H -2.36795 -3.35983 -4.46535  
H -2.73846 -4.30588 -3.01086  
H -1.06985 -3.78739 -3.33343  
C -3.83955 -1.72232 -2.89746  
H -4.11568 -0.81773 -2.33783  
H -4.54964 -2.51572 -2.61819  
H -4.00195 -1.50552 -3.97007

## 9<sup>12</sup>

Si -0.43941 0.04075 0.03744  
N -1.35182 -1.34025 -0.17774  
N -2.67624 -2.75838 -1.59731  
N -3.18245 -2.71612 0.56508  
N -1.41024 1.38189 0.23980  
N -3.20399 2.91653 -0.16455  
N -2.15482 3.08063 1.78876  
C -2.30810 -2.17497 -0.38027  
C -3.74589 -3.62320 -1.38340  
H -4.20569 -4.20215 -2.17356  
C -4.05533 -3.59684 -0.06840  
H -4.82413 -4.14869 0.45654  
C -1.99481 -2.54027 -2.90952  
C -0.52277 -2.94832 -2.78136  
H 0.00111 -2.79145 -3.73587  
H -0.43522 -4.00868 -2.50208  
H -0.02360 -2.35172 -2.01480  
C -2.66155 -3.40789 -3.98731  
H -2.14373 -3.23230 -4.94123  
H -3.72166 -3.14893 -4.13306  
H -2.58183 -4.48179 -3.76045  
C -2.12113 -1.06589 -3.32194  
H -1.60350 -0.89894 -4.27836  
H -1.66894 -0.40527 -2.57664  
H -3.17741 -0.78494 -3.44171  
C -3.26231 -2.30723 1.99741

C -4.30165 -3.17711 2.72157  
H -4.32025 -2.88672 3.78187  
H -4.04585 -4.24663 2.67297  
H -5.31730 -3.03272 2.32314  
C -3.71018 -0.83707 2.06758  
H -3.80028 -0.52085 3.11753  
H -4.69122 -0.71454 1.58322  
H -2.99399 -0.17547 1.56846  
C -1.89949 -2.51729 2.67563  
H -1.96113 -2.23377 3.73719  
H -1.11759 -1.91620 2.20562  
H -1.59716 -3.57400 2.61417  
C -2.16459 2.35636 0.58870  
C -3.79112 3.95124 0.55653  
H -4.60832 4.55085 0.17712  
C -3.15184 4.05132 1.74253  
H -3.33350 4.75202 2.54659  
C -3.71423 2.36815 -1.45262  
C -2.60039 2.40594 -2.51158  
H -2.26846 3.44137 -2.68137  
H -2.97171 1.99563 -3.46277  
H -1.73484 1.81834 -2.19309  
C -4.88416 3.23018 -1.95228  
H -5.22820 2.82634 -2.91547  
H -4.58218 4.27545 -2.11907  
H -5.73997 3.21053 -1.26069  
C -4.22503 0.93578 -1.21204  
H -4.65307 0.52548 -2.13869  
H -5.01081 0.93963 -0.44094  
H -3.41615 0.27708 -0.88003  
C -1.19165 2.90638 2.92048  
C -1.56924 3.86559 4.06123  
H -0.86902 3.70495 4.89327  
H -2.58608 3.67990 4.44087  
H -1.48426 4.92089 3.76110  
C 0.22420 3.24425 2.43689  
H 0.93209 3.18942 3.27777  
H 0.25785 4.26272 2.02060  
H 0.56971 2.52987 1.68021  
C -1.26426 1.46889 3.46217  
H -0.57580 1.36110 4.31358  
H -0.96670 0.73583 2.70556  
H -2.28354 1.23504 3.80368  
Si 1.77011 0.26489 0.44878  
Si 2.36184 1.90430 -1.17194  
Si 3.05734 -1.72164 0.85918  
C 0.96040 3.18751 -1.35878  
H 1.36660 4.10960 -1.80681  
H 0.49736 3.44755 -0.39884  
H 0.16605 2.81701 -2.01928  
C 2.64052 1.22129 -2.99623  
C 1.42509 0.35577 -3.38287  
H 0.48427 0.93076 -3.36751  
H 1.29358 -0.49698 -2.70434  
H 1.54790 -0.04053 -4.40872  
C 2.74084 2.35907 -4.03416  
H 2.82402 1.93296 -5.05204  
H 3.61881 3.00061 -3.88231  
H 1.84796 3.00461 -4.02669  
C 3.90855 0.35342 -3.06607  
H 4.01363 -0.10689 -4.06671  
H 3.87759 -0.46375 -2.33034  
H 4.82179 0.94080 -2.88060  
C 3.88440 2.92685 -0.46499  
C 4.49333 3.87496 -1.51460  
H 5.25149 4.52660 -1.04090  
H 3.74111 4.53512 -1.97620  
H 5.00192 3.32545 -2.32136  
C 4.99251 2.00689 0.07201  
H 5.83950 2.60652 0.45586  
H 5.39153 1.32717 -0.69559  
H 4.62480 1.39243 0.90719

C 3.36794 3.77482 0.71696  
H 4.20772 4.32328 1.18363  
H 2.90933 3.14469 1.49470  
H 2.62316 4.52315 0.40363  
C 4.90039 -1.46548 0.43689  
H 5.47435 -2.35435 0.74538  
H 5.33263 -0.59859 0.95077  
H 5.05670 -1.32282 -0.64233  
C 2.57136 -3.37583 -0.07509  
C 3.54257 -4.54185 0.20608  
H 3.27019 -5.40940 -0.42456  
H 3.51122 -4.88112 1.24994  
H 4.58645 -4.28647 -0.03427  
C 1.14757 -3.82472 0.29972  
H 0.82932 -4.67520 -0.33244  
H 0.40690 -3.02259 0.17458  
H 1.09736 -4.16646 1.34590  
C 2.65298 -3.07478 -1.58512  
H 2.27893 -3.93312 -2.17304  
H 3.69110 -2.89023 -1.90417  
H 2.06486 -2.19205 -1.86534  
C 2.99562 -1.87908 2.82378  
C 3.71086 -0.64819 3.42299  
H 3.63001 -0.66458 4.52634  
H 3.26402 0.29584 3.07016  
H 4.78451 -0.63020 3.17765  
C 3.71319 -3.14529 3.32924  
H 3.79612 -3.11940 4.43218  
H 4.73512 -3.24221 2.92819  
H 3.16141 -4.06190 3.07191  
C 1.54905 -1.89363 3.35061  
H 1.54337 -1.93264 4.45667  
H 0.98520 -2.76694 2.99168  
H 1.00114 -0.98709 3.04829

### g<sup>3</sup>

Si -0.49104 0.03707 0.01752  
Si 1.72083 0.06561 0.32070  
C -1.98611 2.46782 0.70423  
N -1.36989 1.42848 0.28233  
C -2.76287 4.19209 1.96779  
H -2.86741 4.85079 2.81972  
N -1.91108 3.08972 1.95761  
C -3.37639 4.27027 0.76636  
H -4.09113 5.00527 0.41918  
N -2.91694 3.21966 -0.02149  
C 0.44265 2.88879 2.69419  
H 0.62199 3.93801 2.41253  
H 0.72828 2.23433 1.86068  
H 1.10020 2.63885 3.54094  
C -1.30088 1.22653 3.48730  
H -0.67391 0.95116 4.34836  
H -1.06218 0.53581 2.67284  
H -2.35719 1.09246 3.76444  
C -1.02567 2.68804 3.09448  
C -4.15719 1.46323 -1.22324  
H -4.97155 1.52276 -0.48424  
H -3.45341 0.68767 -0.90143  
H -4.58847 1.16600 -2.19085  
C -2.32603 2.79600 -2.39149  
H -1.85039 3.78510 -2.47335  
H -2.72840 2.51837 -3.37766  
H -1.55651 2.06948 -2.11674  
C -4.49723 3.87075 -1.80697  
H -4.05709 4.87551 -1.89915  
H -5.36129 3.91963 -1.12716  
H -4.87272 3.58028 -2.79885  
C -3.46069 2.83119 -1.35328  
C -1.33278 3.57271 4.31415  
H -1.10280 4.63242 4.12705

H -0.69753 3.24339 5.14872  
H -2.38177 3.48382 4.63706  
C 2.73886 -2.12558 2.76781  
C -2.44498 -2.08316 -0.50447  
N -1.50074 -1.26810 -0.20685  
C -3.84854 -3.46146 -1.64435  
H -4.27253 -3.99960 -2.48207  
N -2.76355 -2.59680 -1.76588  
Si 2.52005 1.83158 -1.03994  
C 1.27577 3.27405 -0.92587  
H 0.24362 2.94387 -1.09026  
H 1.51901 4.04321 -1.67662  
H 1.31608 3.74595 0.06609  
C 4.20740 2.56714 -0.34353  
C 4.19036 2.48254 1.19623  
H 3.29245 2.95332 1.62881  
H 5.07407 2.99922 1.61629  
H 4.21103 1.44242 1.55320  
C 4.34219 4.05692 -0.73123  
H 4.31923 4.21879 -1.81923  
H 5.30736 4.45273 -0.36302  
H 3.54868 4.67537 -0.28473  
C 5.44938 1.81895 -0.86214  
H 5.39785 0.73841 -0.67061  
H 6.35943 2.19836 -0.36033  
H 5.59691 1.96051 -1.94348  
C -4.21452 -3.50241 -0.34380  
H -5.00275 -4.08202 0.11918  
N -3.36545 -2.66245 0.37165  
C -0.57939 -2.56100 -2.92670  
H -0.42201 -3.61892 -2.67219  
H -0.10693 -1.95002 -2.15195  
H -0.07366 -2.35190 -3.88131  
C -2.30098 -0.75900 -3.35517  
H -1.78594 -0.48546 -4.28834  
H -1.90547 -0.12446 -2.55604  
H -3.37400 -0.54366 -3.46927  
C -2.07607 -2.24731 -3.04526  
C -3.91397 -0.81011 1.89995  
H -4.85983 -0.63650 1.36330  
H -3.14585 -0.16079 1.46493  
H -4.05545 -0.52302 2.95291  
C -2.20223 -2.57524 2.55455  
H -1.94026 -3.64229 2.48507  
H -2.30883 -2.31105 3.61769  
H -1.37479 -1.99649 2.13705  
C -4.62720 -3.14632 2.44165  
H -4.40456 -4.22254 2.37846  
H -5.60979 -2.95622 1.98375  
H -4.70335 -2.88434 3.50684  
C -3.51620 -2.29485 1.80873  
C -2.66608 -3.08541 -4.18945  
H -2.52934 -4.16431 -4.01991  
H -2.13825 -2.82516 -5.11814  
H -3.73559 -2.87957 -4.34924  
C 2.62474 1.38139 -2.94996  
C 1.19075 1.13105 -3.45838  
H 1.20912 0.82349 -4.52108  
H 0.56168 2.03306 -3.39019  
H 0.69398 0.33029 -2.88815  
C 3.23445 2.53276 -3.77357  
H 3.20078 2.28894 -4.85230  
H 4.28936 2.71448 -3.51905  
H 2.68750 3.48021 -3.63939  
C 3.44738 0.10200 -3.18262  
H 3.04149 -0.74086 -2.60723  
H 4.50285 0.22190 -2.89837  
H 3.42663 -0.18170 -4.25208  
Si 2.87335 -1.94925 0.80891  
C 4.72422 -1.68823 0.43799  
H 5.10096 -0.76168 0.89342  
H 4.90399 -1.62662 -0.64612



H 5.32461 -2.52299 0.83563  
C 2.36426 -3.57468 -0.15971  
C 2.50314 -3.27489 -1.66489  
H 1.92585 -2.39039 -1.96084  
H 2.14292 -4.13256 -2.26290  
H 3.55207 -3.09738 -1.95061  
C 3.28873 -4.76959 0.15359  
H 3.02949 -5.62209 -0.50244  
H 3.19533 -5.12160 1.18935  
H 4.34979 -4.53478 -0.02789  
C 0.90919 -3.96986 0.15286  
H 0.79646 -4.31103 1.19415  
H 0.58698 -4.80589 -0.49671  
H 0.20817 -3.13708 -0.00376  
C 1.27551 -2.10973 3.24442  
H 0.70092 -2.96350 2.85712  
H 0.76328 -1.18566 2.93365  
H 1.23075 -2.15946 4.34914  
C 3.41017 -3.41348 3.82213  
H 4.44082 -3.53278 2.91002  
H 2.84372 -4.31378 3.00098  
H 3.46153 -3.39881 4.38708  
C 3.45789 -0.91767 3.40646  
H 3.35993 -0.96009 4.50769  
H 3.02320 0.03699 3.06944  
H 4.53533 -0.90253 3.17765

#### g<sup>4</sup>

Si -0.34254 -0.04358 0.00577  
Si 1.81531 0.46976 0.43370  
C -2.43105 1.85894 0.82759  
N -1.52880 1.06151 0.39017  
C -3.71241 3.18535 2.15695  
H -4.04225 3.70090 3.04910  
N -2.60168 2.34585 2.12940  
C -4.24341 3.23272 0.91513  
H -5.09999 3.79533 0.56696  
N -3.47498 2.42143 0.08630  
C -0.30625 2.52968 3.05554  
H -0.30676 3.59979 2.80141  
H 0.18608 1.97197 2.24802  
H 0.30153 2.38801 3.96256  
C -1.75712 0.52097 3.58185  
H -1.10977 0.28740 4.44010  
H -1.38710 -0.04550 2.72215  
H -2.77869 0.18143 3.80957  
C -1.73655 2.03398 3.31031  
C -4.09098 0.57249 -1.42417  
H -4.93719 0.31278 -0.76949  
H -3.22557 -0.02733 -1.12398  
H -4.35869 0.30675 -2.45776  
C -2.61228 2.48366 -2.22923  
H -2.45651 3.57256 -2.19232  
H -2.81421 2.19442 -3.27173  
H -1.68646 1.99998 -1.90764  
C -5.03699 2.85679 -1.78128  
H -4.88691 3.94550 -1.72115  
H -5.92973 2.58541 -1.19758  
H -5.23999 2.60814 -2.83307  
C -3.79086 2.08016 -1.32951  
C -2.29235 2.75360 4.54993  
H -2.26634 3.84810 4.43769  
H -1.65936 2.49616 5.41103  
H -3.32046 2.44022 4.78882  
C 2.95620 -1.55390 2.96471  
C -1.77678 -2.46534 -0.79426  
N -1.01677 -1.52704 -0.35373  
C -2.82114 -3.95390 -2.16033  
H -3.08090 -4.47384 -3.07312  
N -1.90446 -2.90738 -2.11525

Si 2.61688 2.19805 -0.98404  
C 4.50131 2.30323 -0.71575  
H 4.75666 2.29686 0.35325  
H 4.89757 3.23415 -1.15307  
H 5.02199 1.45862 -1.19066  
C 2.39310 1.93949 -2.92201  
C 3.34284 2.85079 -3.72734  
H 3.16002 3.92051 -3.55570  
H 3.21053 2.66752 -4.81058  
H 4.40018 2.64989 -3.49406  
C 0.94417 2.19456 -3.36444  
H 0.23596 1.58358 -2.78290  
H 0.80879 1.92461 -4.42920  
H 0.64921 3.24935 -3.25600  
C 2.74146 0.47918 -3.25721  
H 3.75392 0.19909 -2.92476  
H 2.69451 0.31363 -4.35067  
H 2.03630 -0.21139 -2.77840  
C -3.26849 -4.17884 -0.90520  
H -3.97487 -4.92359 -0.56207  
N -2.63820 -3.27715 -0.05249  
C 0.35720 -2.52207 -3.01864  
H 0.61750 -3.57308 -2.82516  
H 0.65829 -1.93108 -2.14921  
H 0.93336 -2.17248 -3.88770  
C -1.52744 -0.90714 -3.52872  
H -0.95089 -0.50197 -4.37353  
H -1.31168 -0.28818 -2.65206  
H -2.59946 -0.81757 -3.75904  
C -1.14559 -2.37646 -3.28720  
C -3.68586 -1.72305 1.53970  
H -4.60566 -1.70841 0.93456  
H -3.04481 -0.89636 1.21430  
H -3.96068 -1.55686 2.59189  
C -1.69093 -3.14505 2.23059  
H -1.20558 -4.12665 2.11664  
H -1.93220 -2.99621 3.29395  
H -0.97485 -2.37798 1.92818  
C -3.91955 -4.19447 1.85437  
H -3.47090 -5.19152 1.72630  
H -4.88803 -4.16738 1.33241  
H -4.11997 -4.05421 2.92639  
C -2.97292 -3.07821 1.38704  
C -1.50439 -3.18590 -4.54257  
H -1.23545 -4.24794 -4.43814  
H -0.93284 -2.78101 5.39004  
H -2.57262 -3.10879 -4.79727  
C 1.90564 3.91965 -0.36079  
C 2.37202 5.09357 -1.24384  
H 2.06179 6.05323 -0.78901  
H 1.92709 5.05807 -2.25007  
H 3.46741 5.12934 -1.35899  
C 0.36772 3.92795 -0.31377  
H 0.00160 4.87733 0.12195  
H -0.02862 3.10929 0.29782  
H -0.07993 3.83719 -1.31338  
C 2.44205 4.14980 1.06884  
H 3.53584 4.28112 1.08241  
H 2.19589 3.31081 1.73784  
H 1.99804 5.06785 1.49808  
Si 3.27008 -1.32406 1.02999  
C 5.07210 -0.71702 0.89017  
H 5.19962 0.28873 1.31309  
H 5.40342 -0.68293 -0.15832  
H 5.74488 -1.39918 1.43581  
C 3.21267 -3.00669 0.02772  
C 3.43814 -2.65629 -1.45575  
H 2.72893 -1.90177 -1.81117  
H 3.32496 -3.55749 -2.08711  
H 4.45143 -2.26073 -1.63267  
C 4.32860 -3.98990 0.43835  
H 4.31677 -4.86789 -0.23520

H 4.21015 -4.36877 1.46203  
H 5.33047 -3.53810 0.36055  
C 1.84709 -3.69863 0.19216  
H 1.70575 -4.07670 1.21746  
H 1.76887 -4.56959 -0.48636  
H 1.00755 -3.02454 -0.03283  
C 1.47001 -1.79766 3.27686  
H 1.10140 -2.73281 2.83158  
H 0.84114 -0.97245 2.90882  
H 1.31143 -1.87129 4.36996  
C 3.77407 -2.71901 3.55366  
H 4.84595 -2.65367 3.30605  
H 3.40660 -3.69657 3.20695  
H 3.69370 -2.71827 4.65714  
C 3.38966 -0.25275 3.67456  
H 3.16174 -0.31846 4.75548  
H 2.86051 0.62636 3.27190  
H 4.47208 -0.07016 3.58196

#### TS1

Si 0.19532 -3.12108 -0.59793  
Si -0.99459 -1.05949 -1.19155  
N -4.11018 0.38236 0.07370  
N -3.11542 0.73640 2.03819  
N -1.70660 -0.23674 0.36221  
C -2.86531 0.22119 0.74834  
C -4.98602 1.07647 0.90566  
H -5.96880 1.39746 0.59019  
C -4.58350 -0.21505 -1.22082  
C -2.28336 0.48919 3.25047  
C -2.26276 -3.97392 0.66725  
H -2.47911 -2.92466 0.91692  
H -2.79517 -4.60900 1.40126  
H -2.70178 -4.17843 -0.32198  
C -1.94023 -1.00462 3.31557  
H -2.86023 -1.60700 3.37177  
H -1.32863 -1.21992 4.20365  
H -1.39077 -1.30252 2.41880  
C -0.21081 -3.94708 2.10517  
H -0.24184 -2.87424 2.32968  
H 0.83105 -4.28198 2.22976  
H -0.81581 -4.46258 2.87502  
C 0.95281 -2.91144 -3.33997  
H 1.01578 -3.32218 -4.36562  
H 1.97838 -2.63854 -3.04175  
H 0.35000 -1.98890 -3.39523  
C -1.05732 -4.33950 -2.91790  
H -0.97975 -4.73503 -3.94886  
H -1.73381 -3.47016 -2.94551  
H -1.53582 -5.12109 -2.30689  
C 1.25238 -5.19273 -2.40456  
H 1.35886 -5.56480 -3.44175  
H 0.86278 -6.02522 -1.80375  
H 2.26658 -4.96202 -2.04011  
C -0.53376 -5.77166 0.45554  
H -0.96765 -6.11270 -0.49589  
H -1.01904 -6.35586 1.26100  
H 0.53427 -6.04308 0.45828  
C -4.38619 1.29292 2.09074  
H -4.76686 1.82687 2.95144  
C 0.33512 -3.95372 -2.38206  
C -4.34093 -1.73155 -1.19850  
H -4.81701 -2.18643 -0.31643  
H -3.26859 -1.96373 -1.18848  
H -4.76163 -2.19257 -2.10514  
C -0.75089 -4.26620 0.69686  
C -3.88814 0.46159 -2.40889  
H -4.25350 0.03207 -3.35453  
H -2.80358 0.28841 -2.37182  
H -4.09814 1.54255 -2.41555

C -1.03201 1.36780 3.19669  
H -0.43162 1.14435 2.30982  
H -0.40524 1.20559 4.08468  
H -1.31730 2.42838 3.16600  
C -6.10104 0.00475 -1.37427  
H -6.41836 -0.47498 -2.31105  
H -6.36672 1.07000 -1.45097  
H -6.67497 -0.45333 -0.55447  
C 2.00180 -3.03802 0.02300  
H 2.65113 -2.53582 -0.70832  
H 2.40881 -4.04862 0.19800  
H 2.07972 -2.47638 0.96274  
C -3.07492 0.85801 4.51713  
H -4.00665 0.27946 4.60500  
H -3.31413 1.93134 4.56517  
H -2.45070 0.62426 5.39204  
Si -0.28938 2.97742 -0.81084  
Si 0.30081 0.65748 -0.34777  
N 3.48976 -0.24457 1.92268  
N 3.93483 -0.16259 -0.25448  
N 1.75043 0.61591 0.51351  
C 2.92834 0.11262 0.68936  
C 4.78369 -0.71259 1.73063  
H 5.41054 -1.06999 2.53674  
C 2.84303 -0.06386 3.25238  
C 4.05339 0.21972 -1.69697  
C 1.16484 3.77332 -3.25353  
H 1.96186 3.05223 -3.02287  
H 1.14345 3.88725 -4.35308  
H 1.46208 4.74583 -2.83643  
C 4.84551 1.53796 -1.77849  
H 5.84166 1.43060 -1.32215  
H 4.97787 1.84243 -2.82845  
H 4.30888 2.33978 -1.25118  
C -0.59820 2.03312 -3.53365  
H 0.12886 1.21918 -3.39914  
H -1.57662 1.63748 -3.23231  
H -0.65156 2.25482 -4.61595  
C 0.43688 4.17973 1.67299  
H 1.04283 4.89873 2.25498  
H -0.62179 4.41461 1.86370  
H 0.64033 3.18144 2.07735  
C 2.30748 4.00477 0.03486  
H 2.88152 4.73163 0.63973  
H 2.56583 2.99548 0.38617  
H 2.65522 4.10467 -1.00305  
C 0.48465 5.71317 -0.28212  
H 1.03467 6.43510 0.34993  
H 0.78553 5.90254 -1.32215  
H -0.58665 5.95574 -0.19168  
C -1.25319 4.39962 -3.11438  
H -1.07760 5.34786 -2.58460  
H -1.20504 4.61611 -4.19773  
H -2.28277 4.07790 -2.89512  
C 5.05654 -0.65657 0.41302  
H 5.96359 -0.94290 -0.10305  
C 0.79643 4.27389 0.17863  
C 2.52539 1.42744 3.44507  
H 3.45288 2.02055 3.41728  
H 1.86428 1.78599 2.65155  
H 2.03608 1.59220 4.41685  
C -0.21876 3.30854 -2.75588  
C 1.58697 -0.94195 3.32411  
H 1.06379 -0.77808 4.27714  
H 0.89722 -0.71728 2.50592  
H 1.86050 -2.00486 3.26259  
C 2.69850 0.39632 -2.38369  
H 2.17101 1.27524 -2.00432  
H 2.86457 0.55824 -3.45858  
H 2.05988 -0.48686 -2.26944  
C 3.80495 -0.50477 4.36673  
H 3.29981 -0.36312 5.33327

H 4.07140 -1.56961 4.28670  
H 4.72652 0.09666 4.38319  
C -2.08925 3.24044 -0.26744  
H -2.39185 4.29329 -0.38342  
H -2.77145 2.61979 -0.86405  
H -2.22902 2.95400 0.78398  
C 4.80238 -0.90353 -2.44408  
H 5.85128 -1.00355 -2.13178  
H 4.29979 -1.87124 -2.29890  
H 4.80930 -0.67781 -3.52022

### INT1

Si 1.74080 -2.63881 -0.66408  
Si -0.30512 -1.44950 -1.31412  
N -3.68699 -1.56181 0.20373  
N -2.90189 -0.76953 2.12691  
N -1.29745 -0.86599 0.32533  
C -2.50962 -1.07373 0.81770  
C -4.74616 -1.40760 1.09219  
H -5.77059 -1.62702 0.82938  
C -3.88634 -2.32112 -1.08696  
C -2.00105 -0.67280 3.32009  
C 0.02452 -4.57427 0.62728  
H -0.65755 -3.75666 0.90400  
H -0.12545 -5.39530 1.35469  
H -0.28967 -4.94775 -0.36032  
C -0.99215 -1.82429 3.24982  
H -1.51577 -2.79282 3.25437  
H -0.31368 -1.79271 4.11330  
H -0.40076 -1.76219 2.33279  
C 1.85760 -3.59398 2.03103  
H 1.34304 -2.65885 2.28076  
H 2.93859 -3.40894 2.13014  
H 1.58025 -4.33991 2.79998  
C 2.27180 -2.07161 -3.41078  
H 2.55733 -2.38789 -4.43209  
H 2.99321 -1.29958 -3.10034  
H 1.27658 -1.60060 -3.48614  
C 1.27351 -4.32469 -2.99232  
H 1.54326 -4.62158 -4.02406  
H 0.24770 -3.92340 -3.02007  
H 1.25938 -5.24334 -2.38555  
C 3.69584 -3.88105 -2.47764  
H 3.97307 -4.15564 -3.51367  
H 3.78783 -4.79043 -1.86882  
H 4.45109 -3.16154 -2.12223  
C 2.39275 -5.33240 0.34889  
H 2.15620 -5.82623 -0.60476  
H 2.25740 -6.08747 1.14713  
H 3.46147 -5.06490 0.33667  
C -4.27520 -0.92146 2.25439  
H -4.82235 -0.65529 3.14864  
C 2.27485 -3.28399 -2.45352  
C -2.99327 -3.56972 -1.06781  
H -3.21076 -4.18493 -0.18090  
H -1.93110 -3.29640 -1.06986  
H -3.17457 -4.17382 -1.96978  
C 1.49332 -4.11252 0.62500  
C -3.61151 -1.41583 -2.29065  
H -3.74908 -1.98359 -3.22339  
H -2.57348 -1.05979 -2.28300  
H -4.30622 -0.56204 -2.30009  
C -1.33486 0.69964 3.34576  
H -0.70159 0.85308 2.46749  
H -0.70599 0.80158 4.23992  
H -2.09965 1.48821 3.37190  
C -5.34680 -2.80191 -1.19208  
H -5.44384 -3.36013 -2.13385  
H -6.06402 -1.96819 -1.23507  
H -5.62800 -3.48352 -0.37522

C 3.25653 -1.66724 -0.02866  
H 3.56242 -0.89052 -0.74297  
H 4.11844 -2.33609 0.13606  
H 3.03586 -1.16048 0.91955  
C -2.82162 -0.83263 4.61237  
H -3.36017 -1.79122 4.64768  
H -3.53874 -0.01089 4.76000  
H -2.12299 -0.80925 5.46126  
Si -1.77533 2.40215 -0.80467  
Si -0.21905 0.59418 -0.28172  
N 3.12792 1.48863 1.86604  
N 3.31479 1.79649 -0.32952  
N 1.10237 1.21675 0.61402  
C 2.36641 1.46921 0.67549  
C 4.44928 1.80858 1.58858  
H 5.21964 1.86201 2.34603  
C 2.59239 1.32468 3.24262  
C 3.18142 2.14571 -1.77798  
C -0.98556 3.85943 -3.26021  
H 0.07259 3.63098 -3.07613  
H -1.10522 3.96679 -4.35416  
H -1.19790 4.84282 -2.81826  
C 3.28626 3.67691 -1.92032  
H 4.24176 4.05303 -1.52438  
H 3.21802 3.96647 -2.98057  
H 2.47126 4.17053 -1.37400  
C -1.65450 1.47757 -3.55806  
H -0.63018 1.10346 -3.42550  
H -2.33050 0.65876 -3.28310  
H -1.80326 1.67582 -4.63608  
C -1.59542 3.78130 1.68353  
H -1.37880 4.69334 2.27029  
H -2.62516 3.47463 1.92436  
H -0.91544 2.99808 2.03540  
C 0.05046 4.53851 -0.01878  
H 0.24242 5.43718 0.59728  
H 0.77040 3.76562 0.28652  
H 0.26073 4.81288 -1.06147  
C -2.37621 5.18063 -0.21726  
H -2.20008 6.07108 0.41492  
H -2.25648 5.50032 -1.26189  
H -3.42876 4.88718 -0.07411  
C -3.38320 3.19928 -3.05442  
H -3.68274 4.09997 -2.49730  
H -3.47998 3.43272 -4.13101  
H -4.11390 2.40742 -2.82953  
C 4.56246 1.99600 0.26257  
H 5.44459 2.24973 -0.31099  
C -1.39864 4.05613 0.18216  
C 1.59042 2.45970 3.51059  
H 2.10608 3.43173 3.46497  
H 0.79630 2.46079 2.75983  
H 1.13887 2.35370 4.50862  
C -1.93441 2.75672 -2.74596  
C 1.97315 -0.07264 3.37272  
H 1.49629 -0.19091 4.35659  
H 1.22841 -0.24116 2.59221  
H 2.75322 -0.84176 3.27563  
C 1.86619 1.67176 -2.38053  
H 1.01407 2.17631 -1.91769  
H 1.85334 1.92046 -3.45125  
H 1.73462 0.58981 -2.27990  
C 3.72725 1.43528 4.27473  
H 3.29481 1.28831 5.27541  
H 4.49598 0.66117 4.12955  
H 4.20771 2.42521 4.26556  
C -3.49715 1.84247 -0.21337  
H -4.23727 2.65075 -0.32171  
H -3.85218 0.97822 -0.78951  
H -3.47298 1.54194 0.84357  
C 4.32421 1.46579 -2.56345  
H 5.31555 1.87234 -2.31896

H 4.33842 0.38331 -2.37425  
H 4.16747 1.62388 -3.64058

## TS2

Si -3.41609 -0.53467 -0.50286  
Si -1.44159 0.41949 -1.59832  
N 0.13573 4.00961 0.29759  
N 0.87852 3.12079 2.20081  
N 0.15193 1.57268 0.47992  
C 0.36775 2.76197 0.93401  
C 0.54745 5.03840 1.13858  
H 0.52591 6.08063 0.85159  
C -0.68491 4.27603 -0.92585  
C 1.00524 2.21916 3.38108  
C -3.35509 1.37503 1.67888  
H -2.32945 1.64457 1.39367  
H -3.46219 1.58107 2.76029  
H -4.04441 2.04832 1.14757  
C -0.37999 1.63208 3.68936  
H -1.09864 2.44280 3.88471  
H -0.33584 0.98401 4.57640  
H -0.74968 1.04293 2.84565  
C -2.62280 -0.97037 2.15246  
H -1.60470 -0.83751 1.76122  
H -2.85846 -2.04502 2.09684  
H -2.61127 -0.69251 3.22187  
C -4.55199 -0.21502 -3.11062  
H -5.39847 0.06200 -3.76687  
H -4.32533 -1.27617 -3.31050  
H -3.67896 0.37923 -3.42384  
C -5.22023 1.53138 -1.44841  
H -6.00631 1.86158 -2.15345  
H -4.32833 2.14859 -1.63974  
H -5.57906 1.76069 -0.43258  
C -6.20408 -0.77703 -1.33575  
H -7.01358 -0.46497 -2.02246  
H -6.57558 -0.63062 -0.31237  
H -6.05392 -1.85802 -1.48640  
C -5.05588 -0.44702 1.90606  
H -5.82265 0.22242 1.48747  
H -5.08961 -0.32978 3.00579  
H -5.35148 -1.48470 1.68135  
C 0.99892 4.50226 2.28810  
H 1.42866 5.00779 3.14250  
C -4.92431 0.03230 -1.63238  
C -2.10975 3.75712 -0.68582  
H -2.54847 4.23811 0.20200  
H -2.12019 2.67458 -0.52083  
H -2.74686 3.96796 -1.55676  
C -3.64561 -0.10843 1.38924  
C -0.03441 3.64259 -2.15884  
H -0.70748 3.71851 -3.02517  
H 0.17125 2.58302 -1.99682  
H 0.90788 4.15587 -2.40220  
C 2.04920 1.14203 3.08305  
H 1.73637 0.51519 2.24400  
H 2.19773 0.49403 3.95788  
H 3.01032 1.61328 2.83408  
C -0.77907 5.79124 -1.18362  
H -1.35420 5.94115 -2.10881  
H 0.21086 6.24793 -1.33419  
H -1.30466 6.32523 -0.37805  
C -3.42818 -2.43897 -0.62029  
H -4.29448 -2.84479 -0.07184  
H -2.51439 -2.87457 -0.19743  
H -3.51700 -2.76807 -1.66726  
C 1.48102 3.01693 4.60684  
H 0.76304 3.79532 4.90513  
H 2.46615 3.47992 4.44249  
H 1.58060 2.31933 5.45106

Si 2.72246 0.54751 -1.42972  
Si 0.53270 0.07547 -0.34466  
N 0.45251 -3.34359 1.91834  
N -0.16718 -3.59192 -0.22170  
N 0.71970 -1.40480 0.53868  
C 0.38349 -2.63432 0.69451  
C -0.10333 -4.60719 1.76833  
H -0.23347 -5.29753 2.59134  
C 1.10914 -2.87934 3.17144  
C 0.04894 -3.72205 -1.70109  
C 3.08629 -1.04121 -3.86811  
H 2.39348 -1.78979 -3.45800  
H 3.01554 -1.10301 -4.97010  
H 4.10575 -1.34862 -3.59535  
C 1.47386 -4.25169 -1.93920  
H 1.61695 -5.21297 -1.42177  
H 1.65837 -4.40413 -3.01417  
H 2.21668 -3.54229 -1.56011  
C 1.39792 0.78736 -4.01024  
H 0.57399 0.13500 -3.68956  
H 1.11104 1.81650 -3.75311  
H 1.45052 0.73293 -5.11387  
C 4.42863 0.05467 0.80700  
H 5.25327 -0.49827 1.29428  
H 4.67281 1.12623 0.86684  
H 3.52699 -0.11778 1.40181  
C 4.03093 -1.95032 -0.61251  
H 4.86729 -2.44757 -0.08569  
H 3.10376 -2.20987 -0.08480  
H 3.98688 -2.38175 -1.62201  
C 5.56853 -0.13383 -1.38708  
H 6.41001 -0.60981 -0.84924  
H 5.57890 -0.53179 -2.41164  
H 5.79026 0.94392 -1.43990  
C 3.81105 1.35522 -3.98731  
H 4.82841 1.15765 -3.62317  
H 3.83380 1.25634 -5.08891  
H 3.57379 2.40670 -3.76289  
C -0.47159 -4.76149 0.48554  
H -0.96293 -5.60961 0.02851  
C 4.24953 -0.42820 -0.64351  
C 2.54950 -2.44911 2.85605  
H 3.12511 -3.29799 2.45566  
H 2.55585 -1.65003 2.11231  
H 3.04803 -2.08812 3.76861  
C 2.75565 0.39068 -3.40024  
C 0.29146 -1.73112 3.76908  
H 0.77523 -1.34546 4.67940  
H 0.20135 -0.92035 3.04519  
H -0.71928 -2.07635 4.03083  
C -0.14336 -2.40056 -2.44125  
H 0.61084 -1.66704 -2.15028  
H -0.04251 -2.56459 -3.52334  
H -1.15008 -1.99372 -2.25404  
C 1.16648 -4.02557 4.19514  
H 1.68890 -3.65961 5.09117  
H 0.16520 -4.35413 4.51249  
H 1.72505 -4.89409 3.81424  
C 3.10985 2.36940 -1.01732  
H 4.16479 2.59979 -1.23631  
H 2.48861 3.06302 -1.59513  
H 2.92994 2.57747 0.04773  
C -0.96657 -4.72724 -2.28492  
H -0.75693 -5.76388 -1.98681  
H -1.99500 -4.47392 -1.99416  
H -0.90152 -4.69419 -3.38209

## INT2

Si -3.53314 0.06838 -0.51530  
Si -1.43111 0.29958 -1.75977

## S83

N 0.89244 3.78337 -0.17097  
N 1.70230 3.26218 1.84205  
N 0.77229 1.44672 0.57310  
C 1.07860 2.68390 0.71047  
C 1.45311 4.92879 0.39410  
H 1.51262 5.87566 -0.12621  
C -0.00183 3.82916 -1.36166  
C 1.78263 2.63257 3.19006  
C -2.93600 1.73297 1.78775  
H -1.87609 1.73903 1.49400  
H -2.97240 1.88279 2.88304  
H -3.42623 2.60188 1.32350  
C 0.34819 2.37166 3.68303  
H -0.20153 3.32260 3.76545  
H 0.35987 1.88955 4.67212  
H -0.19083 1.72044 2.98676  
C -2.83066 -0.73109 2.10079  
H -1.79184 -0.76623 1.75228  
H -3.27957 -1.72293 1.93784  
H -2.80984 -0.56016 3.19207  
C -4.58625 1.09242 -3.00838  
H -5.41751 1.55354 -3.57469  
H -4.43758 0.07591 -3.40910  
H -3.66961 1.65845 -3.23403  
C -5.03151 2.54380 -1.02216  
H -5.76990 3.08878 -1.63975  
H -4.07986 3.08841 -1.10152  
H -5.36979 2.61711 0.02203  
C -6.29444 0.40675 -1.33498  
H -7.06624 0.99776 -1.86303  
H -6.61073 0.32618 -0.28531  
H -6.31208 -0.60472 -1.76919  
C -5.05376 0.38757 1.95002  
H -5.65728 1.22479 1.57001  
H -5.04168 0.47283 3.05303  
H -5.58123 -0.54888 1.70587  
C 1.93431 4.61402 1.61209  
H 2.46573 5.24965 2.30853  
C -4.91554 1.08389 -1.50139  
C -1.36956 3.24499 -0.98881  
H -1.83535 3.82014 -0.17516  
H -1.27689 2.21697 -0.59695  
H -2.03847 3.25631 -1.85900  
C -3.61029 0.40075 1.41124  
C 0.62542 3.08019 -2.54012  
H -0.06486 3.05985 -3.39617  
H 0.85094 2.04435 -2.27480  
H 1.56119 3.56779 -2.84895  
C 2.61053 1.34522 3.11459  
H 2.14094 0.62720 2.43990  
H 2.69887 0.89073 4.11273  
H 3.62136 1.56611 2.74167  
C -0.23585 5.28766 -1.79698  
H -0.92869 5.28597 -2.65103  
H 0.69253 5.77385 -2.13156  
H -0.68787 5.89183 -0.99641  
C -4.01990 -1.76554 -0.73985  
H -4.98158 -1.96900 -0.24188  
H -3.25989 -2.41923 -0.29280  
H -4.12909 -2.02792 -1.80409  
C 2.47690 3.58823 4.17424  
H 1.90924 4.51785 4.32952  
H 3.49740 3.84151 3.84754  
H 2.55459 3.08457 5.14883  
Si 2.74973 -0.14847 -1.60827  
Si 0.57993 0.00448 -0.36014  
N -0.19414 -2.97018 2.29285  
N -0.93068 -3.43732 0.22780  
N 0.46181 -1.43862 0.57631  
C -0.14255 -2.49750 0.96258  
C -1.02374 -4.08239 2.36484  
H -1.28021 -4.56836 3.29733

C 0.61507 -2.45023 3.43161  
C -0.74474 -3.84046 -1.20214  
C 2.67489 -2.19378 -3.70014  
H 1.84480 -2.67299 -3.16333  
H 2.55761 -2.44336 -4.77128  
H 3.60658 -2.66910 -3.36028  
C 0.56998 -4.63126 -1.32096  
H 0.54436 -5.51468 -0.66420  
H 0.72917 -4.97104 -2.35624  
H 1.42129 -4.00765 -1.02907  
C 1.46341 -0.06513 -4.20949  
H 0.51272 -0.38934 -3.76216  
H 1.47092 1.03506 -4.18673  
H 1.44745 -0.36234 -5.27499  
C 4.28628 -0.55096 0.73043  
H 4.95234 -1.15862 1.37107  
H 4.75441 0.43856 0.61527  
H 3.34703 -0.40813 1.27481  
C 3.55276 -2.67867 -0.34743  
H 4.26456 -3.21410 0.30889  
H 2.57689 -2.67202 0.15283  
H 3.46339 -3.26735 -1.27097  
C 5.41153 -1.34569 -1.34384  
H 6.14261 -1.85797 -0.69031  
H 5.35273 -1.92812 -2.27511  
H 5.83525 -0.35873 -1.58762  
C 3.94367 -0.11161 -4.24923  
H 4.89027 -0.49135 -3.84132  
H 3.90588 -0.40754 -5.31457  
C 3.98532 0.98796 -4.22228  
C -1.46403 -4.36992 1.12600  
H -2.15314 -5.14700 0.82213  
C 4.05301 -1.25024 -0.62119  
C 2.10434 -2.50663 3.05629  
H 2.40221 -3.53720 2.80829  
H 2.30740 -1.87115 2.19141  
H 2.72065 -2.15681 3.89863  
C 2.70102 -0.66368 -3.51386  
C 0.18721 -1.01694 3.76429  
H 0.83999 -0.60404 4.54642  
H 0.25788 -0.38099 2.87748  
H -0.84740 -0.99469 4.13206  
C -0.70969 -2.62679 -2.13163  
H 0.17059 -2.00859 -1.94542  
H -0.67085 -2.95152 -3.18080  
H -1.63032 -2.02711 -2.01844  
C 0.39360 -3.32916 4.67288  
H 1.00799 -2.92941 5.49280  
H -0.65392 -3.31454 5.01057  
H 0.70158 -4.37234 4.50370  
C 3.54104 1.59203 -1.55657  
H 4.63508 1.50632 -1.65140  
H 3.19479 2.23407 -2.37553  
H 3.32232 2.10540 -0.60922  
C -1.91457 -4.74042 -1.64688  
H -1.89718 -5.72429 -1.15757  
H -2.88705 -4.26520 -1.45887  
H -1.82619 -4.92059 -2.72810

### TS3

Si -3.41611 -0.01090 -1.04426  
Si -1.26374 -1.10300 -1.41918  
N 3.61640 -0.57425 -2.33790  
N 4.32424 0.35682 -0.44374  
N 1.95912 -0.18707 -0.64270  
C 3.15799 -0.14407 -1.07035  
C 4.98236 -0.34902 -2.45131  
H 5.55526 -0.60243 -3.33378  
C 2.76792 -1.17353 -3.40427  
C 4.55302 0.90468 0.92467

C -4.07602 -1.24426 -3.62626  
H -3.05652 -1.65625 -3.68929  
H -4.44980 -1.11742 -4.65998  
H -4.70542 -2.00513 -3.14338  
C 5.21102 2.29365 0.79092  
H 6.19113 2.25127 0.29365  
H 5.36560 2.72929 1.78987  
H 4.56215 2.96905 0.21469  
C -3.22247 1.10041 -3.66205  
H -2.16496 0.78525 -3.68705  
H -3.26086 2.11388 -3.23353  
H -3.55934 1.17553 -4.71294  
C -3.85899 -1.21802 1.47825  
H -4.48368 -1.78539 2.19333  
H -3.58356 -0.27323 1.96593  
H -2.93675 -1.79049 1.32705  
C -5.06408 -2.33443 -0.41930  
H -5.62520 -2.90901 0.34112  
H -4.21455 -2.95651 -0.73998  
H -5.73185 -2.20804 -1.28522  
C -5.87349 -0.14587 0.49775  
H -6.50595 -0.69939 1.21712  
H -6.49485 0.06676 -0.38347  
H -5.61664 0.81629 0.96792  
C -5.55788 0.64047 -2.90730  
H -6.26868 -0.08359 -2.48127  
H -5.87724 0.83033 -3.94957  
H -5.66864 1.58777 -2.35513  
C 5.41154 0.21224 -1.30387  
H 6.41524 0.51673 -1.03129  
C -4.61905 -0.97990 0.16145  
C 1.67695 -0.17072 -3.81070  
H 2.13148 0.76028 -4.18542  
H 1.04205 0.07182 -2.95474  
H 1.04333 -0.59737 -4.60297  
C -4.11231 0.10786 -2.88509  
C 2.15713 -2.47914 -2.88093  
H 1.50726 -2.93588 -3.64228  
H 1.54959 -2.28514 -1.99466  
H 2.95001 -3.19659 -2.61763  
C 3.26363 1.06511 1.72736  
H 2.55829 1.75331 1.25415  
H 3.52331 1.46144 2.72054  
H 2.75107 0.11211 1.86466  
C 3.62359 -1.48910 -4.64105  
H 2.97138 -1.93108 -5.40820  
H 4.41632 -2.22028 -4.42086  
H 4.07976 -0.58514 -5.07333  
C -3.34817 1.76936 -0.36989  
H -4.32036 2.27785 -0.47834  
H -2.58912 2.37705 -0.87807  
H -3.08482 1.76303 0.69741  
C 5.49063 -0.05833 1.68213  
H 6.46355 -0.16854 1.18035  
H 5.03395 -1.05598 1.75922  
H 5.67779 0.31824 2.69960  
Si 0.61159 -2.49369 1.31028  
Si 0.38310 -0.16304 -0.01798  
N -0.24466 3.56065 -0.12100  
N -0.94354 3.15800 1.95504  
N 0.06764 1.30962 0.80017  
C -0.32154 2.53182 0.85164  
C -0.83435 4.71960 0.38225  
H -0.94901 5.62497 -0.19838  
C 0.48831 3.51644 -1.41803  
C -0.99777 2.60170 3.33380  
C -1.76560 -4.06062 0.48541  
H -2.05049 -3.27667 -0.23836  
H -2.17320 -5.01034 0.09219  
H -2.27728 -3.85200 1.43547  
C 0.44809 2.43634 3.83634  
H 0.93257 3.42317 3.90640

### S84

H 0.46434 1.96632 4.83115  
H 1.03038 1.81554 3.14896  
C 0.34475 -4.51124 -0.74920  
H 0.08637 -3.75845 -1.50694  
H 1.43927 -4.62458 -0.72853  
H -0.07789 -5.47408 -1.09130  
C 0.95281 -0.94239 3.66597  
H 0.71382 -0.72019 4.72265  
H 2.04965 -0.92092 3.57718  
H 0.55483 -0.12793 3.05389  
C -1.10596 -2.36746 3.66260  
H -1.21492 -2.18722 4.74871  
H -1.70551 -1.60659 3.14574  
H -1.55621 -3.34950 3.45188  
C 1.15683 -3.37334 4.06401  
H 1.10520 -3.12351 5.14071  
H 0.75289 -4.38671 3.95175  
H 2.22358 -3.40211 3.79196  
C 0.06977 -5.32605 1.58706  
H -0.44601 -5.22580 2.55258  
H -0.28207 -6.27068 1.13301  
H 1.14665 -5.44473 1.78439  
C -1.25089 4.47640 1.64006  
H -1.77408 5.13990 2.31624  
C 0.37756 -2.30919 3.25983  
C 1.95000 3.12074 -1.16369  
H 2.42360 3.84823 -0.48647  
H 2.01516 2.12479 -0.72183  
H 2.51205 3.10721 -2.11017  
C -0.24037 -4.15244 0.63180  
C -0.21229 2.54495 -2.37552  
H 0.36529 2.43251 -3.30394  
H -0.33260 1.55380 -1.92175  
H -1.21127 2.91968 -2.63395  
C -1.78634 1.28424 3.32349  
H -1.41008 0.60975 5.25012  
H -1.71420 0.78281 4.29956  
H -2.84821 1.48887 3.11940  
C 0.48167 4.90718 -2.07694  
H 1.03171 4.83876 -3.02681  
H -0.53589 5.25414 -2.31182  
H 0.98378 5.66298 -1.45442  
C 2.47978 -2.80037 1.07151  
H 2.75245 -3.80460 1.43523  
H 2.77518 -2.72069 0.01751  
H 3.06919 -2.06495 1.63666  
C -1.72791 3.57669 4.27199  
H -1.19153 4.53026 4.38905  
H -2.75420 3.78263 3.93105  
H -1.79449 3.11159 5.26663

### TS4

Si 0.88182 -0.53344 -1.54099  
Si -0.97490 0.09795 -0.26812  
Si -2.62678 1.46894 -1.53521  
Si -0.81239 -2.91809 -1.26679  
N 4.50610 -0.23233 0.40791  
N 2.36209 -0.31806 -0.69490  
N -1.03165 0.49606 1.37157  
N -0.10901 1.70706 3.24518  
N 3.94198 1.52371 -0.86876  
N -2.13646 0.80669 3.49408  
C 4.75229 -1.68228 0.67228  
C 3.47414 0.25772 -0.43128  
C -1.08141 0.94559 2.57101  
C 1.34076 1.76979 2.87860  
C -4.45565 0.92782 -1.40890  
H -4.71951 0.52182 -0.42368  
H -4.71005 0.16990 -2.16215  
H -5.09792 1.80419 -1.59402

C -2.59325 3.25900 -0.71979  
C -2.22404 1.49773 -3.45905  
C 0.28424 -3.99487 -0.03840  
C -0.41226 -3.49936 -3.04535  
H -0.58530 -4.58352 -3.16195  
H 0.63236 -3.27859 -3.30363  
H -1.04842 -2.97411 -3.77539  
C -2.73548 -3.37321 -1.07468  
C 5.49856 0.74059 0.52356  
H 6.35233 0.63447 1.18101  
C 5.15766 1.79755 -0.23942  
H 5.67059 2.74551 -0.33748  
C 3.43990 2.28772 -2.05025  
C -3.20402 -0.23399 3.41587  
C -1.81803 1.50163 4.65778  
H -2.50172 1.59867 5.49142  
C -0.59566 2.05177 4.50433  
H -0.06146 2.70218 5.18485  
C -4.07217 -0.01175 2.17095  
H -4.59375 0.95436 2.23207  
H -3.46481 -0.01402 1.26373  
H -4.82286 -0.81160 2.08826  
C -4.11307 -0.14420 4.65127  
H -4.91298 -0.89170 4.54702  
H -3.57527 -0.36568 5.58508  
H -4.58930 0.84476 4.73708  
C -2.51358 -1.60838 3.40070  
H -1.94023 -1.75217 4.33017  
H -3.25554 -2.41628 3.31765  
H -1.82289 -1.68672 2.55391  
C 3.62744 -2.25711 1.53931  
H 3.66384 -1.83056 2.55188  
H 2.65336 -2.03396 1.10371  
H 3.73389 -3.34816 1.62282  
C 6.07642 -1.85935 1.43229  
H 6.07253 -1.31783 2.39110  
H 6.20475 -2.92853 1.65664  
H 6.94777 -1.53717 0.84287  
C 4.86508 -2.40367 -0.68438  
H 3.95955 -2.25918 -1.28529  
H 5.72326 -2.00703 -1.25003  
H 5.01311 -3.48422 -0.53649  
C 1.53781 2.48988 1.54430  
H 1.12619 3.50910 1.58138  
H 2.61011 2.54885 1.31024  
H 1.05788 1.93847 0.73323  
C 2.11503 2.53909 3.96049  
H 3.16947 2.59299 3.65344  
H 1.74808 3.57118 4.07367  
H 2.08030 2.03631 4.93852  
C 1.88987 0.34011 2.79143  
H 2.96086 0.37072 2.55098  
H 1.75257 -0.19146 3.74637  
H 1.39147 -0.22139 1.99368  
C 4.39974 3.45025 -2.36060  
H 5.41070 3.09844 -2.61517  
H 4.00864 3.99904 -3.22952  
H 4.46817 4.16454 -1.52591  
C 3.40725 1.36321 -3.28242  
H 4.40822 0.94258 -3.46748  
H 2.70019 0.53261 -3.16069  
H 3.09956 1.93537 -4.17122  
C 2.06033 2.89076 -1.75608  
H 1.32831 2.12363 -1.48310  
H 2.12061 3.61262 -0.92980  
H 1.68185 3.41555 -2.64514  
C -3.04663 -4.81367 -1.53926  
H -2.57963 -5.58424 -0.91462  
H -4.13959 -4.98134 -1.49449  
H -2.74000 -4.98976 -2.58160  
C -3.21215 -3.19379 0.37178  
H -3.03830 -2.16740 0.71939

H -4.29871 -3.38870 0.45159  
H -2.70679 -3.87505 1.07278  
C -3.55316 -2.43317 -1.96944  
H -3.31755 -2.56936 -3.03584  
H -4.63616 -2.62153 -1.84503  
H -3.36982 -1.38508 -1.71345  
C -0.21043 -5.44546 0.12444  
H 0.50851 -6.01290 0.74571  
H -1.18555 -5.50558 0.62902  
H -0.29037 -5.97143 -0.84022  
C 0.31359 -3.34048 1.35566  
H 1.03694 -3.85373 2.01572  
H 0.59008 -2.27734 1.31723  
H -0.66955 -3.39898 1.84469  
C 1.70331 -4.06821 -0.63114  
H 2.12088 -3.07469 -0.83397  
H 2.38811 -4.58173 0.06739  
H 1.71592 -4.63430 -1.57565  
C -1.15877 3.75779 -0.48939  
H -0.59028 3.85476 -1.42459  
H -1.16968 4.75278 -0.00564  
H -0.60564 3.08127 0.17089  
C -3.33852 4.29164 -1.58770  
H -3.40261 5.25406 -1.04619  
H -2.81842 4.49143 -2.53630  
H -4.37011 3.98551 -1.82411  
C -3.30198 3.18267 0.64892  
H -4.36048 2.89405 0.55492  
H -2.81589 2.46867 1.32589  
H -3.27688 4.17318 1.14036  
C -3.40313 2.10612 -4.25197  
H -3.58654 3.16132 -4.00879  
H -3.18117 2.05671 -5.33418  
H -4.34295 1.55548 -4.09228  
C -2.02425 0.05713 -3.97014  
H -1.75596 0.07369 -5.04278  
H -1.21037 -0.46720 -3.44464  
H -2.93980 -0.54246 -3.87641  
C -0.94913 2.29868 -3.77534  
H -1.03139 3.35717 -3.48461  
H -0.07161 1.87003 -3.27247  
H -0.74697 2.27395 -4.86219

### INT3

Si -1.48683 0.16532 -1.58643  
Si 0.89253 -0.04100 -0.50490  
Si 1.58442 -2.37890 -1.13786  
Si 1.81612 1.80385 -1.92349  
N -4.75779 1.45168 0.14059  
N -2.78259 0.23094 -0.51559  
N 1.33615 0.21162 1.15094  
N 0.61573 -0.25529 3.42361  
N -4.93702 -0.75828 -0.05187  
N 2.81216 -0.32879 2.99068  
C -4.24101 2.84618 0.08113  
C -4.02922 0.30044 -0.18612  
C 1.55463 -0.08419 2.37296  
C -0.73549 0.38107 3.46009  
C 3.41263 -2.66876 -1.60400  
H 4.11977 -2.21158 -0.90157  
H 3.64133 -2.29220 -2.61040  
H 3.59953 -3.75549 -1.60395  
C 1.29960 -3.57559 0.40222  
C 0.60718 -2.98102 -2.73457  
C 1.15419 3.49709 -1.16710  
C 1.02754 1.68573 -3.65935  
H 1.16675 2.63891 -4.19496  
H -0.04884 1.46500 -3.62434  
H 1.50689 0.89666 -4.25728  
C 3.74539 1.90321 -2.30870

C -6.06351 1.08876 0.46567  
H -6.81619 1.80434 0.76981  
C -6.17234 -0.25126 0.34789  
H -7.03439 -0.87824 0.53429  
C -4.67384 -2.17599 -0.42234  
C 4.11923 0.19798 2.49932  
C 2.60789 -0.69623 4.31921  
H 3.40874 -1.02783 4.96802  
C 1.28689 -0.65360 4.57898  
H 0.77399 -0.94050 5.48820  
C 4.46004 -0.39358 1.12784  
H 4.61428 -1.47809 1.20678  
H 3.65409 -0.20777 0.41402  
H 5.38476 0.05883 0.74083  
C 5.24242 -0.19566 3.47253  
H 6.20008 0.14494 3.05219  
H 5.13013 0.27634 4.45974  
H 5.30295 -1.28736 3.60185  
C 4.01348 1.73150 2.45009  
H 3.77600 2.12496 3.45125  
H 4.96148 2.17976 2.11595  
H 3.21953 2.03840 1.76099  
C -3.05864 2.97347 1.05288  
H -3.40923 2.81549 2.08405  
H -2.28510 2.23059 0.83934  
H -2.60868 3.97484 0.98713  
C -5.33777 3.82716 0.52528  
H -5.67110 3.63549 1.55666  
H -4.92389 4.84552 0.49442  
H -6.21145 3.80447 -0.14362  
C -3.85233 3.18521 -1.36984  
H -3.08850 2.50373 -1.75919  
H -4.73688 3.11655 -2.02227  
H -3.45614 4.21034 -1.42506  
C -1.66629 -0.27104 2.43688  
H -1.81443 -1.33437 2.637324  
H -2.64805 0.22448 2.44616  
H -1.26829 -0.18978 1.42277  
C -1.35878 0.20253 4.85470  
H -2.36723 0.64130 4.84047  
H -1.46473 -0.86016 5.12216  
H -0.78444 0.71433 5.64132  
C -0.56146 1.88640 3.19099  
H -1.51392 2.41490 3.33329  
H 0.17813 2.31173 3.88758  
H -0.21490 2.06434 2.16660  
C -5.90420 -3.03574 -0.09107  
H -6.78765 -2.74535 -0.67941  
H -5.67304 -4.08173 -0.33936  
H -6.15708 -2.99537 0.97955  
C -4.41366 -2.26120 -1.93833  
H -5.30203 -1.92227 -2.49419  
H -3.56434 -1.63796 -2.24335  
H -4.19621 -3.30051 -2.22863  
C -3.48689 -2.70334 0.39639  
H -2.59121 -2.09779 0.23915  
H -3.72419 -2.68263 1.47128  
H -3.26340 -3.74153 0.10954  
C 4.00865 2.71764 -3.59531  
H 3.63734 3.75019 -3.53816  
H 5.09862 2.77305 -3.77593  
H 3.56056 2.24852 -4.48395  
C 4.55433 2.53212 -1.16191  
H 4.36715 2.03471 -0.20369  
H 5.63818 2.45253 -1.36940  
H 4.32944 3.60154 -1.03290  
C 4.26292 0.47746 -2.55544  
H 3.69136 -0.03879 -3.34382  
H 5.32102 0.49816 -2.87779  
H 4.20635 -0.13612 -1.65076  
C 1.65162 4.71968 -1.96325  
H 1.18135 5.64023 -1.56859

H 2.73978 4.85677 -1.88339  
H 1.39467 4.65896 -3.03281  
C 1.55445 3.67210 0.30918  
H 1.06929 4.57114 0.73449  
H 1.25367 2.80673 0.91600  
H 2.63882 3.80273 0.43158  
C -0.38127 3.48093 -1.24894  
H -0.81061 2.65561 -0.66160  
H -0.80213 4.41477 -0.83143  
H -0.74904 3.39109 -2.28218  
C -0.01414 -3.25236 1.12734  
H -0.88368 -3.38114 0.47112  
H -0.15476 -3.92407 1.99549  
H -0.02615 -2.22336 1.50624  
C 1.27252 -5.05744 -0.02279  
H 1.19833 -5.69794 0.87611  
H 0.41008 -5.29957 -0.66072  
H 2.18696 -5.35994 -0.55761  
C 2.46111 -3.40643 1.40081  
H 3.42783 -3.71012 0.96914  
H 2.55785 -2.37585 1.75906  
H 2.28737 -4.04279 2.28877  
C 1.24396 -4.24430 -3.35611  
H 1.24649 -5.10821 -2.67855  
H 0.67241 -4.53871 -4.25622  
H 2.28093 -4.06764 -3.68011  
C 0.68424 -1.86693 -3.79739  
H 0.23865 -2.21244 -4.74904  
H 0.13111 -0.96688 -3.49701  
H 1.72437 -1.57073 -4.01293  
C -0.86989 -3.27677 -2.42628  
H -0.99378 -4.14541 -1.76195  
H -1.37127 -2.42152 -1.94487  
H -1.43025 -3.48755 -3.35575

#### INT4

Si 0.36858 0.58330 2.49912  
Si 0.70257 0.42698 0.00503  
N 4.04720 -1.77724 -0.07687  
N 2.54400 -2.96210 -1.21912  
N 1.81123 -0.83421 -0.37196  
C 2.70146 -1.72814 -0.53318  
C 4.62326 -2.99081 -0.44894  
H 5.63936 -3.25873 -0.18295  
C 4.91536 -0.71826 0.50786  
C 1.34423 -3.36688 -1.99727  
C 3.71590 -3.70506 -1.14205  
H 3.82023 -4.69583 -1.56491  
C 1.20721 1.93981 3.67803  
C 0.62986 -1.22137 3.23994  
C -1.49751 0.93667 2.64281  
H -1.87585 0.67952 3.64537  
H -2.06639 0.36805 1.89478  
H -1.70284 2.00567 2.47835  
Si 1.39116 2.44778 -1.32588  
Si -1.39999 -0.25514 -1.30623  
N -5.04221 0.37946 0.06207  
N -4.67090 -1.81906 0.10436  
N -2.78748 -0.37105 -0.35431  
C -4.03603 -0.58469 -0.10109  
C -6.23698 -0.26256 0.38269  
H -7.15194 0.27197 0.60237  
C -4.93099 1.81823 -0.31117  
C -4.09280 -3.15707 -0.20831  
C -6.01207 -1.59197 0.41346  
H -6.70102 -2.38657 0.66839  
C 2.84908 3.44204 -0.57902  
C 2.04841 1.94935 -3.11657  
C -0.10929 3.71635 -1.40984  
H 3.81465 3.02592 -0.90122

H 2.81300 4.48630 -0.92859  
H 2.85248 3.45803 0.51790  
C -6.25179 2.53851 0.00606  
H -6.50886 2.46977 1.07422  
H -6.13312 3.60363 -0.24015  
H -7.09275 2.15479 -0.59085  
C -4.67629 1.91230 -1.82761  
H -3.75950 1.38622 -2.11886  
H -5.51857 1.46430 -2.37816  
H -4.58045 2.96452 -2.13519  
C -3.81939 2.48658 0.51098  
H -4.05490 2.42945 1.58408  
H -2.85503 2.00020 0.35433  
H -3.72587 3.54501 0.22664  
C -3.72827 -3.21182 -1.70474  
H -2.96985 -2.46337 -1.96939  
H -3.33259 -4.20767 -1.95911  
H -4.62232 -3.02759 -2.32101  
C -5.13390 -4.25126 0.07818  
H -6.02279 -4.16132 -0.56421  
H -4.67427 -5.22874 -0.12798  
H -5.45116 -4.25023 1.13220  
C -2.87130 -3.40932 0.68296  
H -2.42003 -4.38426 0.44582  
H -2.11598 -2.63594 0.53927  
H -3.16352 -3.40874 1.74379  
C 1.12409 -2.36499 -3.14221  
H 0.23114 -2.63583 -3.72561  
H 0.97296 -1.35519 -2.75143  
H 1.99761 -2.35467 -3.81253  
C 0.12816 -3.43778 -1.06451  
H -0.05042 -2.46534 -0.59501  
H -0.77150 -3.72492 -1.62648  
H 0.29548 -4.17208 -0.26163  
C 1.55672 -4.76246 -2.60691  
H 2.39897 -4.78272 -3.31490  
H 1.71860 -5.53105 -1.83550  
H 0.64991 -5.03746 -3.16523  
C 6.01680 -0.36845 -0.51571  
H 6.65447 0.43892 -0.12341  
H 6.66343 -1.23080 -0.73579  
H 5.56800 -0.02980 -1.46044  
C 4.13279 0.55116 0.82947  
H 3.69757 0.98571 -0.07090  
H 3.32265 0.35934 1.53762  
H 4.81900 1.28784 1.27312  
C 5.55597 -1.25283 1.80419  
H 6.19049 -2.13323 1.62384  
H 6.19216 -0.47401 2.25194  
H 4.78287 -1.53010 2.53295  
C -0.33535 -2.15836 2.49811  
H -0.12998 -2.17278 1.42032  
H -0.22918 -3.19725 2.86433  
H -1.38509 -1.86533 2.64109  
C 0.28680 -1.28381 4.74139  
H 0.31514 -2.33524 5.08475  
H 1.00560 -0.72674 5.35992  
H -0.72171 -0.89922 4.96188  
C 2.06081 -1.75130 3.04482  
H 2.80625 -1.14255 3.57571  
H 2.14267 -2.78151 3.44044  
H 2.34106 -1.78497 1.98568  
C 0.34954 2.15110 4.94784  
H 0.26421 1.24945 5.56850  
H 0.81414 2.93450 5.57605  
H -0.66867 2.49374 4.71046  
C 1.25606 3.29014 2.94723  
H 1.74246 4.05572 3.58058  
H 1.81848 3.22785 2.00782  
H 0.24891 3.66131 2.70900  
C 2.63451 1.57273 4.12336  
H 3.31600 1.43135 3.27373

H 3.05539 2.38450 4.74584  
H 2.65975 0.65685 4.73216  
C -0.42269 4.13958 0.03731  
H 0.42450 4.66025 0.50784  
H -1.28677 4.83000 0.05890  
H -0.68091 3.27713 0.67006  
C -1.37724 3.09549 -2.01109  
H -1.69752 2.20185 -1.45459  
H -2.21891 3.80982 -1.96085  
H -1.25590 2.80066 -3.06155  
C 0.22105 4.98544 -2.22085  
H 0.30034 4.77774 -3.29783  
H -0.58841 5.72902 -2.09613  
H 1.15649 5.46934 -1.89973  
C 2.69105 3.16193 -3.82645  
H 3.10999 2.84021 -4.79842  
H 1.97208 3.96485 -4.03674  
H 3.52035 3.59732 -3.24743  
C 3.15122 0.88077 -2.96890  
H 2.78678 -0.03547 -2.49306  
H 3.55010 0.61130 -3.96470  
H 4.00163 1.25271 -2.37631  
C 0.93358 1.39410 -4.02207  
H 0.34148 0.59969 -3.54177  
H 0.23100 2.18333 -4.33070  
H 1.36732 0.97150 -4.94747

#### TSS

Si -0.23959 -0.95841 2.42350  
Si 0.53622 -0.07749 0.24501  
N 4.49932 -0.43346 -0.28287  
N 3.47042 -1.75926 -1.74362  
N 2.09359 -0.65098 -0.09481  
C 3.22262 -0.91481 -0.63683  
C 5.44092 -0.89921 -1.19665  
H 6.48313 -0.60448 -1.16179  
C 4.95181 0.36403 0.89510  
C 2.49262 -2.69134 -2.37745  
C 4.81992 -1.71179 -2.07385  
H 5.24267 -2.23967 -2.91838  
C -0.17928 0.31902 3.90709  
C 0.57951 -2.69637 2.84784  
C -2.08525 -1.33935 2.15543  
H -2.48898 -1.90685 3.01031  
H -2.24755 -1.93254 1.24672  
H -2.67371 -0.42037 2.04691  
Si 0.62087 2.79297 -0.49432  
Si -1.00125 0.39645 -1.51667  
N -4.79736 -0.19239 -0.11298  
N -3.95471 -1.98064 -1.15006  
N -2.55153 -0.02208 -0.96432  
C -3.64274 -0.66015 -0.76620  
C -5.75570 -1.20332 -0.09525  
H -6.71619 -1.09635 0.39271  
C -5.07727 1.24244 0.16809  
C -3.12213 -2.85229 -2.02325  
C -5.24694 -2.28543 -0.72009  
H -5.70006 -3.25895 -0.85430  
C 1.84451 3.37260 0.87265  
C 1.65419 2.99969 -2.17942  
C -0.80982 4.16455 -0.36977  
H 2.84423 2.95166 0.71278  
H 1.94714 4.46975 0.84730  
H 1.52319 3.08881 1.88465  
C -6.45745 1.38701 0.82751  
H -6.52342 0.81397 1.76538  
H -6.61600 2.44759 1.07216  
H -7.27545 1.07627 0.16042  
C -5.08570 2.00142 -1.17247  
H -4.14061 1.86009 -1.70996

H -5.90543 1.62965 -1.80760  
H -5.23230 3.07942 -1.00682  
C -4.02550 1.79414 1.14176  
H -4.13267 1.31567 2.12726  
H -3.01267 1.60717 0.77367  
H -4.15708 2.87833 1.26898  
C -2.88417 -2.15642 -3.37757  
H -2.33191 -1.21495 -3.26718  
H -2.30302 -2.81602 -4.04095  
H -3.84670 -1.93539 -3.86491  
C -3.86447 -4.17267 -2.29174  
H -4.81417 -4.01343 -2.82426  
H -3.22968 -4.80673 -2.92762  
H -4.06337 -4.72961 -1.36351  
C -1.79921 -3.19210 -1.31818  
H -1.17633 -3.82236 -1.97010  
H -1.22366 -2.29456 -1.06490  
H -1.99395 -3.74599 -0.38872  
C 1.40102 -1.89913 -3.10622  
H 0.68244 -2.58732 -3.57743  
H 0.84247 -1.25563 -2.41732  
H 1.83923 -1.26225 -3.88892  
C 1.89737 -3.59362 -1.28732  
H 1.36113 -2.99460 -0.54710  
H 1.19498 -4.31630 -1.72839  
H 2.69284 -4.15110 -0.76903  
C 3.21079 -3.58173 -3.40533  
H 3.63803 -2.99759 -4.23445  
H 4.00570 -4.18859 -2.94592  
H 2.47263 -4.27250 -3.83806  
C 5.46355 1.72842 0.39767  
H 5.80545 2.33911 1.24720  
H 6.30741 1.61547 -0.30004  
H 4.66799 2.27766 -0.12352  
C 3.84183 0.56170 1.92717  
H 2.99449 1.11671 1.52542  
H 3.47091 -0.39886 2.29600  
H 4.25619 1.12632 2.77590  
C 6.09406 -0.40809 1.59132  
H 6.98165 -0.52492 0.95315  
H 6.40794 0.13627 2.49473  
H 5.75045 -1.40959 1.89225  
C -0.01191 -3.74370 1.88164  
H 0.09449 -3.45097 0.82917  
H 0.50574 -4.71296 2.00633  
H -1.08247 -3.91818 2.06916  
C 0.24182 -3.14810 4.28241  
H 0.60604 -4.18030 4.44368  
H 0.72299 -2.51514 5.04297  
H -0.84233 -3.15271 4.47905  
C 2.11087 -2.68677 2.69050  
H 2.58789 -1.98850 3.39541  
H 2.52183 -3.69164 2.90358  
H 2.41639 -2.40173 1.67480  
C -1.09075 -0.11188 5.07592  
H -0.74958 -1.02983 5.57219  
H -1.10734 0.68448 5.84351  
H -2.13173 -0.26911 4.75260  
C -0.71302 1.66096 3.37811  
H -0.69789 2.42827 4.17435  
H -0.11114 2.04220 2.54431  
H -1.75266 1.58094 3.02549  
C 1.25098 0.53111 4.43055  
H 1.91965 0.90096 3.64099  
H 1.25540 1.28278 5.24184  
H 1.69044 -0.39205 4.84026  
C -1.29475 4.24631 1.09078  
H -0.49319 4.54521 1.78368  
H -2.10027 4.99979 1.17974  
H -1.70297 3.29209 1.44291  
C -2.01873 3.85027 -1.26340  
H -2.47116 2.88742 -1.00197

H -2.79849 4.62670 -1.14249  
H -1.75711 3.80680 -2.32985  
C -0.26957 5.55725 -0.75822  
H 0.00897 5.61939 -1.81969  
H -1.05422 6.31834 -0.58634  
H 0.60379 5.85845 -0.15876  
C 2.65521 4.17228 -2.07337  
H 3.21370 4.26813 -3.02379  
H 2.16856 5.13931 -1.88522  
H 3.40121 4.01606 -1.27934  
C 2.47092 1.72170 -2.44102  
H 1.82738 0.84347 -2.57929  
H 3.07547 1.83684 -3.36069  
H 3.16860 1.49989 -1.62216  
C 0.74656 3.24111 -3.40023  
H -0.00615 2.44566 -3.50922  
H 0.22009 4.20571 -3.34769  
H 1.35692 3.25786 -4.32301

## INT5

Si -0.58533 -0.92857 2.46830  
Si -0.78698 -0.34535 0.06134  
N -2.50845 2.87922 -1.44229  
N -4.07745 2.05199 -0.07422  
N -1.91997 0.97068 -0.03247  
C -2.71460 1.86763 -0.46471  
C -3.72302 3.50800 -1.71943  
H -3.84184 4.22201 -2.52488  
C -1.20962 3.43053 -1.92152  
C -4.61818 1.71442 1.27707  
C -4.66167 3.02061 -0.88694  
H -5.71863 3.25407 -0.85778  
C -2.21844 -0.85594 3.44886  
C 0.56597 0.41756 3.31432  
C 0.04970 -2.75584 2.78009  
Si -1.67017 -1.93138 -1.65147  
Si 1.32203 0.29052 -1.31580  
N 5.06210 -0.35240 -0.41084  
N 4.64545 1.78973 0.03578  
N 2.75354 0.36159 -0.42913  
C 4.02216 0.57835 -0.29421  
C 6.27235 0.28149 -0.13652  
H 7.22036 -0.24024 -0.12166  
C 4.92474 -1.75061 -0.90805  
C 3.99794 3.13177 0.01475  
C 6.02100 1.57956 0.13094  
H 6.71793 2.35782 0.41288  
C -3.54363 -2.46501 -1.39902  
C -1.70390 -0.85230 -3.22390  
C -0.50810 -3.45619 -2.11515  
H -2.61201 0.16471 3.52672  
H -2.02447 -1.22076 4.47098  
H -3.00039 -1.49098 3.01354  
H -0.68921 -0.64770 -3.59792  
H -2.19247 0.11148 -3.02511  
H -2.26942 -1.35898 -4.02332  
C 4.40594 -1.72315 -2.35806  
H 5.11306 -1.18033 -3.00485  
H 4.30101 -2.75000 -2.74074  
H 3.42851 -1.23134 -2.43121  
C 3.97882 -2.51908 0.02146  
H 4.40469 -2.58340 1.03442  
H 3.01444 -2.01337 0.09108  
H 3.81242 -3.53953 -0.35427  
C 6.29524 -2.44512 -0.89404  
H 6.16005 -3.48246 -1.23300  
H 7.01385 -1.96556 -1.57586  
H 6.72818 -2.48014 0.11738  
C 3.52897 3.42931 -1.42282  
H 3.07933 4.43314 -1.47614

H 4.38630 3.39923 -2.11349  
H 2.78685 2.69775 -1.76826  
C 5.01940 4.20505 0.42569  
H 5.85129 4.28851 -0.28967  
H 4.50847 5.17844 0.45124  
H 5.42747 4.01675 1.43049  
C 2.83957 3.16860 1.02123  
H 2.34152 4.14915 0.98842  
H 2.09779 2.39715 0.80941  
H 3.21563 3.00272 2.04122  
C -0.18202 3.40508 -0.78173  
H -0.55101 3.96939 0.08854  
H 0.02697 2.38584 -0.44272  
H 0.75677 3.85823 -1.12271  
C -1.39272 4.90866 -2.32541  
H -0.40566 5.32964 -2.56739  
H -2.01980 5.02668 -3.22121  
H -1.82912 5.50226 -1.50786  
C -0.72635 2.64759 -3.14897  
H 0.20861 3.07822 -3.54064  
H -0.52417 1.60166 -2.89983  
H -1.48812 2.67850 -3.94371  
C -3.70217 2.36998 2.32455  
H -2.67864 1.99266 2.22309  
H -3.68561 3.46234 2.18278  
H -4.05854 2.15657 3.34414  
C -4.69425 0.19702 1.46279  
H -4.98264 -0.04406 2.49628  
H -5.43948 -0.23872 0.78428  
H -3.72433 -0.25740 1.25364  
C -6.03719 2.28359 1.43699  
H -6.72536 1.88398 0.67616  
H -6.42105 1.98014 2.42225  
H -6.05754 3.38282 1.39636  
C 0.13691 1.81462 2.82342  
H 0.15445 1.90599 1.72961  
H -0.88192 2.06510 3.15531  
H 0.81074 2.58893 3.23423  
C 0.42250 0.41701 4.85143  
H 0.72651 -0.53323 5.31098  
H 1.06637 1.20667 5.28300  
H -0.60860 0.63166 5.17330  
C 2.04353 0.18156 2.95186  
H 2.20704 0.14072 1.86519  
H 2.67148 0.99928 3.35198  
H 2.42617 -0.75361 3.38887  
C 0.49032 -2.99636 4.23706  
H -0.29719 -2.74187 4.96418  
H 0.73116 -4.06647 4.38154  
H 1.39289 -2.42556 4.50105  
C -1.11908 -3.71396 2.47715  
H -1.93653 -3.61496 3.20777  
H -1.54570 -3.54170 1.48118  
H -0.77390 -4.76394 2.51202  
C 1.22687 -3.09255 1.85692  
H 0.97658 -2.92332 0.80160  
H 2.11028 -2.48486 2.08806  
H 1.51927 -4.15505 1.95628  
C -3.99471 -3.54671 -2.40094  
H -5.08097 -3.72408 -2.28881  
H -3.82480 -3.24566 -3.44694  
H -3.49354 -4.51229 -2.23798  
C -3.80598 -2.99143 0.02263  
H -4.88588 -3.17785 0.17326  
H -3.28447 -3.94286 0.20755  
H -3.48440 -2.28220 0.97687  
C -4.41098 -1.21433 -1.66252  
H -4.08247 -0.33797 -1.09317  
H -4.40450 -0.93590 -2.72732  
H -5.46306 -1.41817 -1.38911  
C -0.79406 -3.94258 -3.55420  
H -0.10219 -4.76788 -3.80771

H -1.81373 -4.32730 -3.68427  
H -0.63462 -3.14855 -4.29967  
C -0.67567 -4.64574 -1.15279  
H -1.69669 -5.05609 -1.16987  
H 0.00871 -5.46693 -1.43775  
H -0.44342 -4.37801 -0.11436  
C 0.96223 -3.00162 -2.08803  
H 1.15109 -2.17014 -2.78652  
H 1.28486 -2.68436 -1.08705  
H 1.63197 -3.83018 -2.38684

### TS6

Si -0.34550 -1.91588 2.03366  
Si -0.85003 -0.47254 0.05716  
N -1.39575 3.54590 -0.63867  
N -2.24233 2.73187 1.26034  
N -0.60891 1.34633 0.08581  
C -1.31430 2.43501 0.23832  
C -2.48042 4.33359 -0.25563  
H -2.82891 5.17106 -0.84444  
C -0.39945 4.05015 -1.64948  
C -2.21583 2.27042 2.68853  
C -2.99590 3.84273 0.88433  
H -3.85997 4.18149 1.44155  
C -1.41586 -1.66896 3.59379  
C 1.50854 -1.71218 2.65471  
C -0.69667 -3.77620 1.50660  
Si -2.82373 -0.77525 -1.41041  
Si 0.81000 0.34973 -1.46900  
N 4.29402 -1.08030 -0.95230  
N 4.45072 0.74925 0.34785  
N 2.33407 0.30767 -0.70656  
C 3.55408 0.02653 -0.47615  
C 5.56560 -1.04662 -0.37545  
H 6.28892 -1.84287 -0.50027  
C 3.93821 -1.88564 -2.15726  
C 4.35090 2.22432 0.56424  
C 5.66190 0.05312 0.39932  
H 6.48283 0.35134 1.04007  
C -4.61007 -0.68331 -0.58332  
C -2.76120 0.76690 -2.52237  
C -2.62298 -2.26836 -2.68905  
H -1.17781 -0.72606 4.10472  
H -1.20542 -2.49058 4.29736  
H -2.49254 -1.68191 3.37940  
H -1.89651 0.72358 -3.19869  
H -2.68771 1.69542 -1.94495  
H -3.67554 0.82061 -3.13543  
C 3.74075 -0.93830 -3.35721  
H 4.64770 -0.33313 -3.51439  
H 3.54915 -1.52200 -4.27119  
H 2.89161 -0.25887 -3.20609  
C 2.68136 -2.73581 -1.90346  
H 2.87532 -3.48057 -1.11902  
H 1.82514 -2.12910 -1.58898  
H 2.39827 -3.26956 -2.82358  
C 5.09196 -2.84782 -2.48732  
H 4.80372 -3.45496 -3.35780  
H 6.01770 -2.31244 -2.74620  
H 5.29928 -3.53848 -1.65551  
C 4.34204 2.90583 -0.81803  
H 4.26414 3.99916 -0.71281  
H 5.27348 2.67267 -1.35828  
H 3.49545 2.55348 -1.41953  
C 5.57665 2.71233 1.35314  
H 6.51433 2.59090 0.79085  
H 5.45450 3.78507 1.56379  
H 5.66882 2.18967 2.31792  
C 3.09736 2.58599 1.37689  
H 3.00407 3.68163 1.43278

H 2.18857 2.18077 0.92370  
H 3.17828 2.19647 2.40104  
C 1.01094 3.90074 -1.07212  
H 1.10580 4.46339 -0.13077  
H 1.25674 2.85465 -0.87451  
H 1.74885 4.29177 -1.78729  
C -0.63479 5.55587 -1.89053  
H 0.17071 5.92457 -2.54172  
H -1.58337 5.75926 -2.40950  
H -0.60488 6.13596 -0.95564  
C -0.54731 3.32701 -2.99383  
H 0.14078 3.77429 -3.72854  
H -0.29384 2.26330 -2.90140  
H -1.57469 3.42345 -3.37523  
C -0.77470 1.94924 3.09050  
H -0.35899 1.14425 2.48581  
H -0.12764 2.83030 2.95911  
H -0.74430 1.64992 4.14817  
C -3.14232 1.06541 2.86860  
H -3.11894 0.71464 3.90994  
H -4.17864 1.33054 2.61665  
H -2.83280 0.24025 2.21885  
C -2.70670 3.40945 3.60561  
H -3.77560 3.63139 3.47367  
H -2.57156 3.09417 4.65069  
H -2.13088 4.33371 3.44850  
C 1.88839 -0.22582 2.72202  
H 1.72623 0.27779 1.76244  
H 1.33139 0.31006 3.50413  
H 2.96195 -0.12578 2.96301  
C 1.69958 -2.30084 4.06930  
H 1.47541 -3.37441 4.12999  
H 2.75415 -2.17113 4.37679  
H 1.08097 -1.78485 4.82018  
C 2.48667 -2.39731 1.68582  
H 2.34578 -2.03689 0.66194  
H 3.53031 -2.16800 1.96859  
H 2.38354 -3.49226 1.68559  
C -0.16614 -4.78559 2.54488  
H -0.55752 -4.59673 3.55704  
H -0.48450 -5.80605 2.26095  
H 0.93158 -4.79597 2.60142  
C -2.22365 -3.95667 1.42792  
H -2.70871 -3.83158 2.40820  
H -2.68470 -3.24159 0.73868  
H -2.47443 -4.97073 1.06586  
C -0.07812 -4.12090 0.14073  
H -0.37929 -3.41271 -0.64098  
H 1.01845 -4.12134 0.16997  
H -0.40002 -5.12681 -0.18712  
C -5.73597 -1.07241 -1.56221  
H -6.71882 -0.89160 -1.08762  
H -5.71127 -0.47554 -2.48742  
H -5.70403 -2.13607 -1.84138  
C -4.74389 -1.56792 0.66764  
H -5.72068 -1.39495 1.15711  
H -4.69292 -2.63856 0.41904  
H -3.96199 -1.36302 1.41244  
C -4.83620 0.79289 -0.18968  
H -3.99378 1.21538 0.36962  
H -4.99001 1.43186 -1.07200  
H -5.73914 0.88663 0.44223  
C -3.46733 -1.99870 -3.95733  
H -3.31517 -2.82548 -4.67598  
H -4.54502 -1.94424 -3.75603  
H -3.16962 -1.07168 -4.46936  
C -3.05461 -3.62853 -2.11200  
H -4.10537 -3.62874 -1.78242  
H -2.95542 -4.41662 -2.88167  
H -2.43969 -3.93531 -1.25905  
C -1.15306 -2.35697 -3.15124  
H -0.80448 -1.41851 -3.60989

H -0.46156 -2.58636 -2.33022  
H -1.04318 -3.15685 -3.90739

### INT6

Si -0.42191 -2.02423 1.95503  
Si -0.90486 -0.49574 0.06048  
N -1.05317 3.60289 -0.52826  
N -1.90467 2.75228 1.35040  
N -0.40286 1.31419 0.08661  
C -1.01871 2.45873 0.29936  
C -2.09971 4.41948 -0.09807  
H -2.41763 5.29366 -0.64928  
C -0.06775 4.10710 -1.55419  
C -1.84134 2.28138 2.77935  
C -2.61965 3.90555 1.02893  
H -3.45696 4.25746 1.61825  
C -1.42354 -1.75095 3.55587  
C 1.46193 -2.00353 2.51695  
C -0.94961 -3.81988 1.35375  
Si -2.94073 -0.50922 -1.33025  
Si 0.73030 0.45702 -1.39851  
N 4.08227 -1.25226 -1.12356  
N 4.46364 0.42435 0.32968  
N 2.28008 0.30647 -0.65656  
C 3.46720 -0.12602 -0.52151  
C 5.36869 -1.39437 -0.59888  
H 6.00424 -2.24260 -0.82171  
C 3.61334 -1.90347 -2.38089  
C 4.52254 1.87409 0.67981  
C 5.60040 -0.38516 0.26564  
H 6.46852 -0.22907 0.89480  
C -4.68635 -0.33125 -0.43358  
C -2.78558 1.08468 -2.35777  
C -2.89683 -1.93833 -2.69269  
H -1.08224 -0.85962 4.10020  
H -1.27845 -2.62019 4.21754  
H -2.50115 -1.64871 3.37141  
H -1.94052 1.01254 -3.05595  
H -2.63368 1.97717 -1.74032  
H -3.70717 1.23455 -2.94340  
C 3.45807 -0.83084 -3.47715  
H 4.40733 -0.28807 -3.61129  
H 3.18975 -1.30554 -4.43404  
H 2.67185 -0.10485 -3.23009  
C 2.29551 -2.66321 -2.15059  
H 2.45587 -3.50815 -1.46622  
H 1.51554 -2.02357 -1.72206  
H 1.91899 -3.06054 -3.10557  
C 4.66332 -2.92393 -2.85234  
H 4.28926 -3.41602 -3.76203  
H 5.62324 -2.44705 -3.10118  
H 4.83870 -3.70834 -2.10006  
C 4.61478 2.67206 -0.63563  
H 4.64041 3.75532 -0.43805  
H 5.53129 2.39492 -1.18062  
H 3.75304 2.45483 -1.27821  
C 5.77811 2.14919 1.52326  
H 6.70866 1.98680 0.95951  
H 5.76591 3.20219 1.84164  
H 5.79667 1.52346 2.42919  
C 3.29987 2.30484 1.50877  
H 3.32896 3.39613 1.65584  
H 2.36321 2.03704 1.01201  
H 3.31814 1.82667 2.49791  
C 1.35456 3.84418 -1.05029  
H 1.52234 4.34306 -0.08352  
H 1.55978 2.77754 -0.92631  
H 2.08131 4.23898 -1.77495  
C -0.21927 5.63700 -1.69171  
H 0.58700 5.99855 -2.34572



H -1.16803 5.93033 -2.16494  
H -0.12516 6.15217 -0.72357  
C -0.32529 3.47835 -2.92970  
H 0.35388 3.92767 -3.67132  
H -0.13802 2.39566 -2.90883  
H -1.36210 3.66159 -3.24960  
C -0.43425 1.77458 3.09176  
H -0.17153 0.91362 2.48031  
H 0.31884 2.55484 2.90403  
H -0.37854 1.48438 4.15070  
C -2.90141 1.20408 3.02276  
H -2.85177 0.84569 4.06087  
H -3.91082 1.60056 2.84287  
H -2.74356 0.35128 2.35407  
C -2.11657 3.47528 3.71822  
H -3.15408 3.83413 3.66120  
H -1.94741 3.14758 4.75449  
H -1.43966 4.31690 3.50844  
C 1.97473 -0.56279 2.66172  
H 1.82556 0.01677 1.74374  
H 1.49812 -0.03650 3.50131  
H 3.06088 -0.57429 2.86265  
C 1.64131 -2.69253 3.88765  
H 1.33181 -3.74610 3.89247  
H 2.71100 -2.66696 4.16742  
H 1.08839 -2.17529 4.68740  
C 2.34731 -2.70957 1.47639  
H 2.21370 -2.27368 0.48122  
H 3.41426 -2.59220 1.73938  
H 2.14488 -3.78868 1.41279  
C -0.47718 -4.91994 2.32598  
H -0.81495 -4.74574 3.35989  
H -0.89571 -5.89339 2.00924  
H 0.61638 -5.02992 2.33920  
C -2.48847 -3.86562 1.32095  
H -2.93030 -3.73986 2.32143  
H -2.90807 -3.08691 0.67545  
H -2.83688 -4.83881 0.92888  
C -0.40653 -4.15205 -0.04760  
H -0.67196 -3.38804 -0.78886  
H 0.68692 -4.24302 -0.05872  
H -0.82177 -5.11305 -0.40375  
C -5.87128 -0.58505 -1.38671  
H -6.82100 -0.36079 -0.86554  
H -5.83533 0.05818 -2.28003  
H -5.92703 -1.63129 -1.72193  
C -4.84075 -1.26723 0.77686  
H -5.78608 -1.05249 1.30957  
H -4.87327 -2.32495 0.47582  
H -4.02143 -1.15336 1.50117  
C -4.78751 1.13312 0.04442  
H -3.89616 1.45585 0.59348  
H -4.91865 1.83039 -0.79651  
H -5.65957 1.25909 0.71304  
C -3.75807 -1.53478 -3.91323  
H -3.69401 -2.32977 -4.67932  
H -4.82145 -1.40888 -3.67142  
H -3.40399 -0.60680 -4.38621  
C -3.41276 -3.29223 -2.17258  
H -4.44881 -3.23272 -1.80403  
H -3.39981 -4.04114 -2.98628  
H -2.79434 -3.69169 -1.36117  
C -1.45316 -2.11086 -3.20975  
H -1.04313 -1.17501 -3.61973  
H -0.75875 -2.44094 -2.42710  
H -1.43041 -2.86842 -4.01547

### TS7

Si -0.87650 0.58555 -1.06391  
Si 1.24078 -0.63135 -0.43232

Si 3.12029 0.65592 -1.29076  
Si 1.59870 -2.65093 0.90204  
N -4.32062 -0.85666 0.55325  
N -2.21029 -0.28805 -0.40260  
N -0.27246 1.55504 0.31681  
N 0.08987 3.15038 2.08584  
N -4.00721 -1.45942 -1.56830  
N -0.89987 3.93804 0.25276  
C -4.08347 -0.33192 1.92471  
C -3.37588 -0.80501 -0.49004  
C -0.35459 2.75144 0.81459  
C 0.71868 2.28321 3.11681  
C 4.92673 0.44950 -0.54158  
C 3.06454 0.24448 -3.20972  
C 2.67978 2.49390 -1.09882  
C 0.30831 -3.92480 0.14558  
C 1.69618 -2.74486 2.85618  
C 3.29508 -3.24589 0.26375  
C -5.46115 -1.52030 0.11885  
H -6.32273 -1.69972 0.74967  
C -5.27531 -1.87905 -1.17169  
H -5.95550 -2.41095 -1.82424  
C -3.48664 -1.53181 -2.96251  
C -1.62300 4.12441 -1.04782  
C -0.73813 4.98372 1.15965  
H -1.06063 5.99565 0.96019  
C -0.12649 4.51165 2.26138  
H 0.16947 5.05015 3.15147  
H 4.12144 -2.77535 0.81514  
H 3.37704 -4.33702 0.39758  
H 2.85238 2.83821 -0.06863  
H 1.62276 2.66239 -1.32886  
H 3.29303 3.11115 -1.77545  
H 3.43146 -3.03360 -0.80675  
C 2.14153 1.94937 2.65313  
H 2.68578 1.38104 3.41984  
H 2.11754 1.35725 1.73147  
H 2.69789 2.87882 2.45532  
C 0.80385 3.03609 4.45625  
H 1.21521 2.34997 5.21061  
H 1.47516 3.90665 4.40885  
H -0.18663 3.36589 4.80512  
C -0.14764 1.03345 3.33659  
H -0.23260 0.44387 2.41935  
H 0.28633 0.41017 4.13063  
H -1.16200 1.33070 3.64222  
C -2.90995 3.27995 -1.05235  
H -3.57646 3.60307 -0.23791  
H -3.43862 3.40505 -2.00958  
H -2.71440 2.20894 -0.92506  
C -2.04826 5.59843 -1.19804  
H -2.73993 5.92061 -0.40515  
H -1.18470 6.28009 -1.22456  
H -2.57804 5.70216 -2.15558  
C -0.69554 3.79964 -2.23096  
H -0.42651 2.73387 -2.25552  
H -1.21104 4.02562 -3.17732  
H 0.21850 4.41040 -2.17566  
C -3.73864 1.16778 1.86041  
H -3.64571 1.57119 2.88109  
H -2.79238 1.32522 1.33297  
H -4.53432 1.72303 1.33983  
C -2.93371 -1.12325 2.56813  
H -2.03142 -1.02973 1.95435  
H -2.71989 -0.73914 3.57718  
H -3.19590 -2.18937 2.64899  
C -5.35355 -0.50909 2.77002  
H -6.20898 0.03914 2.34551  
H -5.63062 -1.56812 2.88520  
H -5.16449 -0.10722 3.77617  
C -3.42030 -0.11133 -3.55296  
H -3.09911 -0.15499 -4.60581

H -4.41195 0.36678 -3.50970  
H -2.69502 0.51302 -3.00954  
C -2.10586 -2.21079 -2.98325  
H -1.35870 -1.63848 -2.42336  
H -2.16576 -3.21694 -2.54453  
H -1.75278 -2.30232 -4.02187  
C -4.44128 -2.37857 -3.82124  
H -5.43697 -1.91915 -3.91381  
H -4.02210 -2.45963 -4.83450  
H -4.55356 -3.39884 -3.42285  
C 2.53050 -1.55689 3.36160  
H 3.57315 -1.60563 3.01132  
H 2.11436 -0.60162 3.02956  
H 2.56034 -1.55025 4.46744  
C 2.40470 -4.03726 3.31699  
H 2.48652 -4.03674 4.42014  
H 1.86396 -4.94995 3.03374  
H 3.42839 -4.11395 2.91860  
C 0.29706 -2.68504 3.49488  
H -0.27417 -1.80777 3.16383  
H -0.30152 -3.57847 3.26319  
H 0.38285 -2.62835 4.59612  
C 0.58602 -4.04884 -1.36863  
H -0.14933 -4.73203 -1.83197  
H 0.49910 -3.08051 -1.88575  
H 1.58731 -4.45663 -1.57870  
C 0.46572 -5.32707 0.76709  
H 0.17066 -5.34893 1.82661  
H -0.19084 -6.04196 0.23717  
H 1.49397 -5.71639 0.69155  
C -1.14301 -3.45694 0.34674  
H -1.31568 -2.45278 -0.06037  
H -1.84211 -4.14832 -0.15992  
H -1.42629 -3.43488 1.40798  
C 3.09411 -1.27729 -3.45532  
H 4.01338 -1.75150 -3.80052  
H 2.23737 -1.78173 -2.97684  
H 3.03207 -1.49277 -4.53821  
C 4.23514 0.90373 -3.96614  
H 4.26418 1.99494 -3.81350  
H 5.21458 0.49591 -3.67727  
H 4.12167 0.73251 -5.05298  
C 1.75184 0.80924 -3.79537  
H 0.85283 0.41297 -3.29777  
H 1.70579 1.90701 -3.71574  
H 1.68225 0.55702 -4.87026  
C 5.76714 1.70493 -0.87068  
H 6.78370 1.58934 -0.45064  
H 5.88025 1.87181 -1.95178  
H 5.33877 2.61907 -0.43238  
C 4.83498 0.33982 0.99094  
H 5.84131 0.19653 1.42687  
H 4.41556 1.25092 1.44156  
H 4.20750 -0.50321 1.30826  
C 5.67743 -0.78272 -1.08133  
H 5.87285 -0.71260 -2.16098  
H 6.66015 -0.87092 -0.58187  
H 5.13737 -1.71984 -0.89892

### 7

Si -0.83653 -0.77956 -0.02245  
Si 0.83608 0.77963 -0.02124  
Si -0.37308 -3.03574 -0.61142  
Si 0.37311 3.03542 -0.61212  
N -2.39435 -0.29656 0.24806  
N -3.63109 1.03120 1.84983  
N -4.39021 0.92521 -0.23394  
N 2.39404 0.29569 0.24699  
N 3.63063 -1.03055 1.85038  
N 4.39068 -0.92522 -0.23312

C -3.36805 0.49133 0.59657  
C -4.78103 1.81510 1.76252  
H -5.18254 2.37050 2.59966  
C -5.24098 1.75123 0.49368  
H -6.10130 2.24398 0.05973  
C -2.90591 0.72526 3.12776  
C -1.50541 1.35365 3.09391  
H -0.91278 0.98463 2.24750  
H -0.96001 1.10596 4.01710  
H -1.56898 2.44863 3.01999  
C -3.68065 1.32967 4.30980  
H -3.14844 1.07835 5.23811  
H -4.69848 0.91967 4.38815  
H -3.73715 2.42685 4.25364  
C -2.83594 -0.79854 3.32634  
H -2.24931 -1.28494 2.54156  
H -3.84553 -1.23652 3.32192  
H -2.36681 -1.02301 4.29572  
C -4.67949 0.38712 -1.60486  
C -5.93759 1.06637 -2.16473  
H -5.81406 2.15695 -2.24777  
H -6.83169 0.84972 -1.56198  
H -6.12173 0.67594 -3.17565  
C -4.93633 -1.12408 -1.47832  
H -5.14443 -1.55584 -2.46849  
H -5.80606 -1.31123 -0.82995  
H -4.06845 -1.63697 -1.04848  
C -3.50772 0.68547 -2.55225  
H -3.36126 1.77075 -2.65874  
H -3.72456 0.27341 -3.54882  
H -2.57546 0.23744 -2.19482  
C 1.48151 -3.25339 -0.27783  
H 2.08097 -2.65177 -0.97498  
H 1.76635 -4.30904 -0.41337  
H 1.76225 -2.95689 0.74130  
C -1.38104 -4.22727 0.53779  
C -0.81315 -4.09747 1.96748  
H 0.23680 -4.42414 2.02975  
H -1.39366 -4.72943 2.66263  
H -0.86690 -3.06387 2.34635  
C -2.88200 -3.87355 0.56964  
H -3.05836 -2.84567 0.91984  
H -3.41289 -4.55639 1.25687  
H -3.35663 -3.97397 -0.41677  
C -1.21100 -5.68817 0.07171  
H -1.67777 -5.86880 -0.90834  
H -1.69644 -6.37075 0.79187  
H -0.15233 -5.98766 0.00408  
C -0.65158 -3.23777 -2.52937  
C -2.13652 -3.42963 -2.88431  
H -2.25845 -3.47795 -3.98115  
H -2.75721 -2.59669 -2.52285  
H -2.54887 -4.36294 -2.47260  
C 0.15594 -4.45573 -3.03050  
H -0.00597 -4.58744 -4.11529  
H -0.14327 -5.39474 -2.54182  
H 1.23896 -4.32609 -2.87850  
C -0.13307 -1.98131 -3.25972  
H 0.91212 -1.74775 -3.00693  
H -0.73655 -1.08782 -3.03307  
H -0.17825 -2.13463 -4.35273  
C 3.36788 -0.49147 0.59664  
C 5.24181 -1.75003 0.49543  
H 6.10262 -2.24252 0.06212  
C 4.78131 -1.81348 1.76408  
H 5.18275 -2.36825 2.60168  
C 2.90510 -0.72393 3.12795  
C 2.83561 0.79994 3.32582  
H 3.84537 1.23754 3.32166  
H 2.36614 1.02502 4.29490  
H 2.24950 1.28629 2.54063  
C 1.50446 -1.35206 3.09396

H 0.91257 -0.98415 2.24657  
H 0.95836 -1.10299 4.01635  
H 1.56795 -2.44714 3.02158  
C 3.67924 -1.32808 4.31053  
H 3.73617 -2.42521 4.25452  
H 3.14614 -1.07708 5.23843  
H 4.69688 -0.91771 4.38957  
C 4.68022 -0.38771 -1.60422  
C 3.50895 -0.68722 -2.55187  
H 3.72621 -0.27634 -3.54884  
H 2.57651 -0.23887 -2.19530  
H 3.36268 -1.77265 -2.65713  
C 4.93629 1.12370 -1.47853  
H 5.80581 1.31169 -0.83014  
H 4.06806 1.63647 -1.04925  
H 5.14438 1.55495 -2.46894  
C 5.93889 -1.06661 -2.16317  
H 6.12327 -0.67659 -3.17422  
H 5.81601 -2.15730 -2.24564  
H 6.83263 -0.84915 -1.56018  
C -1.48156 3.25296 -0.27888  
H -1.76709 4.30824 -0.41572  
H -1.76208 2.95756 0.74064  
H -2.08075 2.65009 -0.97521  
C 1.38080 4.22740 0.53678  
C 1.21061 5.68809 0.07005  
H 1.69598 6.37109 0.78985  
H 0.15188 5.98738 0.00236  
H 1.67729 5.86831 -0.91011  
C 0.81283 4.09816 1.96646  
H 1.39328 4.73043 2.66140  
H 0.86653 3.06473 2.34576  
H -0.23711 4.42488 2.02845  
C 2.88180 3.87382 0.56879  
H 3.35649 3.97436 -0.41757  
H 3.05829 2.84593 0.91895  
H 3.41258 4.55665 1.25613  
C 0.65193 3.23664 -2.53011  
C -0.15621 4.45393 -3.03192  
H 0.14220 5.39333 -2.54349  
H -1.23920 4.32364 -2.88025  
H 0.00599 4.58535 -4.11670  
C 0.13429 1.97955 -3.25997  
H 0.17955 2.13242 -4.35305  
H -0.91080 1.74550 -3.00721  
H 0.73829 1.08656 -3.03281  
C 2.13681 3.42916 -2.88489  
H 2.25889 3.47716 -3.98173  
H 2.75781 2.59665 -2.52302  
H 2.54863 4.36281 -2.47345

## H<sub>2</sub>

H 0.00000 0.00000 0.38037  
H 0.00000 0.00000 -0.38037

## 2 + H<sub>2</sub>

Si -0.72824 -1.06653 -0.10212  
Si -0.55307 1.18013 0.14076  
Si -2.24357 -2.44136 1.14052  
Si -1.84078 2.74045 -1.14811  
N 0.68722 -1.95898 -0.19631  
N 2.11820 -2.98752 -1.79880  
N 2.98290 -2.50652 0.16522  
N 1.03374 1.77435 0.11033  
N 3.37857 2.06189 -0.03716  
N 2.44369 2.59905 1.88462  
C 1.80666 -2.42123 -0.56631  
C 3.43340 -3.41047 -1.79438

C 3.95833 -3.11921 -0.60120  
C 1.16887 -3.20072 -2.90619  
C 1.88418 -3.90036 -4.06226  
C 0.03129 -4.10733 -2.43774  
C 0.63797 -1.86586 -3.42930  
C 3.24924 -2.16477 1.57385  
C 4.48640 -1.26332 1.63349  
C 2.09872 -1.42029 2.23512  
C 3.49727 -3.46495 2.34476  
C -1.23874 -4.04408 1.34569  
C -2.61134 -1.80684 2.93578  
C -3.52958 -2.79109 3.66829  
C -1.28561 -1.73202 3.69782  
C -3.23866 -0.41387 2.97003  
C -3.85265 -2.93558 0.15677  
C -3.54774 -2.93276 -1.34375  
C -5.05729 -2.02287 0.40247  
C -4.26195 -4.36313 0.54726  
C 2.15137 2.10239 0.61594  
C 4.36759 2.53002 0.80679  
C 3.80206 2.84887 1.97461  
C 3.56192 1.79606 -1.47580  
C 5.05193 1.82991 -1.81350  
C 3.03083 0.41305 -1.83935  
C 2.85190 2.87863 -2.28625  
C 1.46571 2.95740 2.93000  
C 2.19290 3.61299 4.10525  
C 0.46282 3.97234 2.38180  
C 0.75865 1.71162 3.45986  
C -0.72976 4.28517 -1.18074  
C -3.50773 3.34744 -0.33926  
C -3.35923 3.31959 1.18475  
C -3.76217 4.80431 -0.75619  
C -4.75116 2.54341 -0.72836  
C -2.03152 2.16486 -2.98811  
C -0.62387 1.99090 -3.56666  
C -2.76549 3.22578 -3.81453  
C -2.76536 0.83162 -3.12453  
H -3.01854 0.04262 -0.36187  
H -3.03307 0.37633 0.31554  
H 4.95603 -3.29669 -0.24318  
H 3.90627 -3.87686 -2.63740  
H 1.16970 -4.04709 -4.87158  
H 2.26293 -4.88556 -3.78601  
H 2.70625 -3.30550 -4.46354  
H -0.66766 -4.28564 -3.25596  
H -0.52000 -3.66095 -1.61580  
H 0.41851 -5.07181 -2.10550  
H -0.04344 -2.04199 -4.26287  
H 1.45470 -1.24029 -3.79064  
H 0.09181 -1.30453 -2.67433  
H 4.70471 -1.00579 2.67020  
H 4.31311 -0.33389 1.09094  
H 5.38007 -1.73767 1.22620  
H 2.41292 -1.15830 3.24702  
H 1.20261 -2.02748 2.31212  
H 1.84136 -0.50165 1.71358  
H 3.69599 -3.24977 3.39536  
H 4.35099 -4.02194 1.95624  
H 2.62217 -4.11379 2.29326  
H -1.70835 -4.73470 2.04870  
H -0.23104 -3.83158 1.70199  
H -1.12724 -4.57103 0.39717  
H -3.65370 -2.48320 4.71215  
H -3.12760 -3.80629 3.68200  
H -4.52800 -2.83693 3.23207  
H -1.45941 -1.38932 4.72377  
H -0.59718 -1.02439 3.23268  
H -0.78291 -2.69888 3.76330  
H -3.41749 -0.10474 4.00570  
H -4.19591 -0.36332 2.44980  
H -2.57323 0.32568 2.51884

H -4.41899 -3.27974 -1.91011  
H -2.71809 -3.59559 -1.59671  
H -3.29144 -1.93830 -1.71357  
H -5.90752 -2.36223 -0.19881  
H -4.86824 -0.98598 0.12787  
H -5.38319 -2.03277 1.44299  
H -5.16515 -4.65449 0.00028  
H -4.48638 -4.46232 1.61007  
H -3.49181 -5.09618 0.30512  
H 5.40467 2.57380 0.53347  
H 4.27632 3.21532 2.86462  
H 5.17244 1.58260 -2.86775  
H 5.62036 1.09378 -1.24211  
H 5.49719 2.81455 -1.66319  
H 3.15861 0.24664 -2.91007  
H 1.97630 0.30775 -1.60119  
H 3.58552 -0.36522 -1.31590  
H 3.02337 2.72482 -3.35267  
H 3.22164 3.87092 -2.02285  
H 1.78024 2.84881 -2.11341  
H 1.45478 3.87668 4.86189  
H 2.70547 4.53282 3.81985  
H 2.90992 2.94128 4.57976  
H -0.21963 4.28395 3.17361  
H -0.13495 3.56092 1.57435  
H 0.97554 4.85893 2.00590  
H 0.05708 1.98972 4.24773  
H 1.47766 1.00931 3.88257  
H 0.18963 1.19405 2.68873  
H -1.03727 4.98783 -1.95754  
H 0.31237 4.02638 -1.35354  
H -0.76473 4.82206 -0.23183  
H -4.24528 3.75138 1.66293  
H -2.49728 3.89847 1.52479  
H -3.23832 2.30708 1.57204  
H -4.69963 5.15729 -0.31305  
H -3.85507 4.92401 -1.83646  
H -2.97651 5.47978 -0.41780  
H -5.63133 2.95437 -0.22239  
H -4.68726 1.49304 -0.45075  
H -4.95336 2.58871 -1.79927  
H -0.68099 1.63044 -4.59969  
H -0.03801 1.26265 -3.00057  
H -0.06469 2.92813 -3.58399  
H -2.77610 2.93962 -4.87182  
H -2.28856 4.20629 -3.75537  
H -3.80595 3.34513 -3.50920  
H -2.82173 0.53608 -4.17794  
H -3.78789 0.87009 -2.74610  
H -2.24123 0.03724 -2.58826

## TS2H<sub>2</sub>

Si 1.12894 -0.50489 0.09652  
Si -1.13130 -0.75207 -0.08804  
Si 2.45228 -1.60733 1.75567  
Si -2.10124 -2.13608 -1.77569  
N 1.98576 0.88893 -0.28523  
N 2.98322 2.42013 -1.79426  
N 2.00815 3.27444 -0.01297  
N -2.22481 0.50526 0.16229  
N -2.77339 2.81874 0.06800  
N -3.37670 1.70944 1.87102  
C 2.28182 2.06740 -0.65057  
C 3.15369 3.78987 -1.82928  
C 2.56706 4.30870 -0.74772  
C 3.61194 1.46507 -2.72436  
C 4.28856 2.23192 -3.86008  
C 4.67718 0.66536 -1.97533  
C 2.55971 0.54582 -3.34276  
C 1.53309 3.50885 1.36596

C 0.66296 4.77085 1.38526  
C 0.68007 2.36653 1.90533  
C 2.75228 3.70627 2.27001  
C 3.82394 -0.35530 2.16705  
C 1.56812 -2.02805 3.42800  
C 2.51540 -2.77777 4.37028  
C 1.18583 -0.70299 4.09445  
C 0.29537 -2.85812 3.25678  
C 3.35883 -3.12566 0.95092  
C 3.73861 -2.78153 -0.49204  
C 2.48637 -4.38053 0.92993  
C 4.65901 -3.43671 1.70300  
C -2.72781 1.56305 0.65831  
C -3.43672 3.69168 0.91240  
C -3.79596 3.01943 2.01153  
C -2.46981 3.09684 -1.35111  
C -2.67937 4.58420 -1.63253  
C -1.01744 2.76343 -1.68348  
C -3.42644 2.29096 -2.22692  
C -3.62980 0.62263 2.83376  
C -4.45889 1.15978 3.99973  
C -4.42727 -0.49644 2.16143  
C -2.30492 0.10523 3.38919  
C -3.85048 -1.43812 -2.06721  
C -2.40532 -3.93724 -1.11605  
C -3.35346 -3.81542 0.08361  
C -3.08430 -4.79317 -2.19127  
C -1.15668 -4.68518 -0.64671  
C -1.19012 -2.01275 -3.47661  
C -0.90442 -0.53092 -3.73646  
C -2.06937 -2.52793 -4.62111  
C 0.13377 -2.77544 -3.47534  
H 0.53619 -2.24457 -0.27795  
H -0.23051 -2.26992 0.41742  
H 2.48625 5.34058 -0.46164  
H 3.65351 4.30114 -2.62991  
H 4.73135 1.51210 -4.54758  
H 5.09638 2.87598 -3.50972  
H 3.58041 2.83331 -4.43269  
H 5.13473 -0.07090 -2.63742  
H 4.24369 0.13641 -1.13070  
H 5.46434 1.32327 -1.60345  
H 3.02300 -0.08612 -4.10167  
H 1.77351 1.12777 -3.82515  
H 2.09647 -0.10589 -2.60825  
H 0.28731 4.92951 2.39577  
H -0.20026 4.66498 0.72742  
H 1.20196 5.67596 1.10641  
H 0.22706 2.69224 2.84310  
H 1.26638 1.47968 2.11913  
H -0.12454 2.09367 1.22597  
H 2.44161 3.87869 3.30149  
H 3.35381 4.56008 1.95415  
H 3.39099 2.82296 2.25434  
H 4.46115 -0.69670 2.98516  
H 3.41286 0.61284 2.45172  
H 4.46389 -0.18064 1.30085  
H 2.05089 -2.89181 5.35581  
H 3.46192 -2.25461 4.52197  
H 2.74430 -3.78198 4.01154  
H 0.66927 -0.89128 5.04212  
H 0.50938 -0.11737 3.47122  
H 2.05507 -0.08219 4.32005  
H -0.18139 -3.02022 4.23009  
H 0.49027 -3.84087 2.82672  
H -0.42794 -2.36333 2.60805  
H 4.29082 -3.61199 -0.94548  
H 4.38424 -1.90353 -0.54922  
H 2.86275 -2.59345 -1.11565  
H 3.00089 -5.19178 0.40345  
H 1.53912 -4.21202 0.41600  
H 2.26156 -4.74576 1.93316

H 5.17025 -4.28194 1.22944  
H 4.49450 -3.70834 2.74530  
H 5.35406 -2.59562 1.68830  
H -3.58380 4.73083 0.68717  
H -4.30231 3.38526 2.88441  
H -2.40560 4.78163 -2.66841  
H -2.04722 5.21651 -1.00593  
H -3.71802 4.89474 -1.51172  
H -0.83132 2.96631 -2.73916  
H -0.77678 1.72141 -1.50078  
H -0.32972 3.37765 -1.10516  
H -3.23193 2.48937 -3.28199  
H -4.46412 2.55620 -2.01792  
H -3.30368 1.22599 -2.05248  
H -4.64994 0.34214 4.69383  
H -5.42825 1.54435 3.67890  
H -3.93757 1.93864 4.55851  
H -4.64051 -1.28414 2.88499  
H -3.88520 -0.94208 1.33226  
H -5.37890 -0.11891 1.78424  
H -2.48402 -0.67150 4.13389  
H -1.74787 0.91020 3.87114  
H -1.67479 -0.32434 2.61432  
H -4.53420 -2.20515 -2.43539  
H -3.84525 -0.63998 -2.80970  
H -4.27736 -1.02142 -1.15497  
H -3.57109 -4.80624 0.49683  
H -4.31017 -3.36031 -0.17942  
H -2.91019 -3.22279 0.88807  
H -3.41441 -5.74392 -1.75902  
H -2.40124 -5.03812 -3.00578  
H -3.96456 -4.31899 -2.62880  
H -1.42089 -5.71030 -0.36481  
H -0.70936 -4.21591 0.22814  
H -0.38508 -4.74937 -1.41470  
H -0.41067 -0.40324 -4.70644  
H -0.24802 -0.10537 -2.97704  
H -1.81563 0.07172 -3.75834  
H -1.56632 -2.36875 -5.58122  
H -3.02822 -2.00875 -4.67314  
H -2.27781 -3.59443 -4.54528  
H 0.68348 -2.59396 -4.40558  
H -0.01644 -3.85384 -3.39756  
H 0.77626 -2.47019 -2.64596

## 4

Si 0.70430 1.19957 -0.19655  
Si 0.70735 -1.19779 0.19596  
Si 2.02592 2.63659 1.22065  
Si 2.03206 -2.63224 -1.22084  
N -0.87701 1.82619 -0.20342  
N -2.31978 2.87945 -1.86073  
N -3.18408 2.36402 0.12541  
N -0.87226 -1.82885 0.20303  
N -3.17834 -2.37154 -0.12483  
N -2.31222 -2.88485 1.86106  
C -1.98622 2.30589 -0.61448  
C -3.66619 3.23824 -1.85961  
C -4.18811 2.92964 -0.65335  
C -1.37047 3.16023 -2.97199  
C -2.09022 3.92659 -4.09393  
C -0.22344 4.04494 -2.45194  
C -0.84982 1.83593 -3.55088  
C -3.30788 2.03154 1.57125  
C -4.75572 2.25370 2.03419  
C -2.94412 0.55927 1.80836  
C -2.37977 2.96427 2.36521  
C 1.07929 4.28656 1.35991  
C 2.24123 1.97415 3.04430  
C 2.70568 3.09351 3.99940

C 0.86597 1.47782 3.53487  
C 3.23977 0.80500 3.11250  
C 3.70554 3.04299 0.30554  
C 3.37408 3.88052 -0.94901  
C 4.42590 1.76029 -0.14603  
C 4.65955 3.86184 1.19634  
C -1.98035 -2.31067 0.61461  
C -4.18089 -2.93916 0.65438  
C -3.65787 -3.24648 1.86049  
C -3.30337 -2.03964 -1.57069  
C -4.75088 -2.26516 -2.03312  
C -2.94306 -0.56658 -1.80827  
C -2.37342 -2.97050 -2.36470  
C -1.36200 -3.16298 2.97221  
C -2.07947 -3.93097 4.09449  
C -0.21283 -4.04486 2.45209  
C -0.84460 -1.83721 3.55066  
C 1.08967 -4.28460 -1.35988  
C 3.71294 -3.03418 -0.30624  
C 3.38380 -3.87223 0.94860  
C 4.66874 -3.85092 -1.19706  
C 4.43025 -1.74965 0.14495  
C 2.24500 -1.96906 -3.04455  
C 0.86859 -1.47567 -3.53472  
C 2.71177 -3.08719 -3.99997  
C 3.24095 -0.79769 -3.11270  
H 1.38267 1.35711 -1.53859  
H 1.38598 -1.35237 1.53824  
H -5.20567 3.05763 -0.30744  
H -4.16445 3.67205 -2.71670  
H -1.36676 4.12458 -4.89821  
H -2.48014 4.89616 -3.74868  
H -2.91551 3.34377 -4.53032  
H 0.47713 4.27642 -3.26846  
H 0.33783 3.54887 -1.65587  
H -0.62241 4.99137 -2.05486  
H -0.08428 2.02655 -4.31842  
H -1.67163 1.26841 -4.01212  
H -0.39834 1.21484 -2.77353  
H -4.82509 1.98476 3.09835  
H -5.46420 1.61521 1.48403  
H -5.06965 3.30416 1.93702  
H -3.00152 0.33200 2.88290  
H -1.93280 0.34070 1.45429  
H -3.64243 -0.10564 1.28060  
H -2.43899 2.74022 3.44145  
H -2.66406 4.01686 2.20923  
H -1.34605 2.82825 2.03331  
H 1.75833 5.09538 1.67643  
H 0.27067 4.22010 2.10169  
H 0.62334 4.57766 0.40259  
H 2.74752 2.70913 5.03584  
H 2.01398 3.95093 3.99930  
H 3.70787 3.47198 3.75362  
H 0.95561 1.04011 4.54662  
H 0.44493 0.70147 2.88088  
H 0.13110 2.29349 3.59928  
H 3.28739 0.40226 4.14153  
H 4.26054 1.11204 2.83761  
H 2.94369 -0.02520 2.45410  
H 4.30268 4.11381 -1.50238  
H 2.89489 4.83948 -0.69620  
H 2.70877 3.34250 -1.64134  
H 5.33609 2.01134 -0.72244  
H 3.79262 1.14176 -0.79833  
H 4.74084 1.13478 0.70083  
H 5.54821 4.17206 0.61534  
H 5.02491 3.27931 2.05582  
H 4.18907 4.77956 1.58558  
H -5.19823 -3.06963 0.30876  
H -4.15485 -3.68141 2.71776  
H -4.82120 -1.99662 -3.09732

H -5.46059 -1.62814 -1.48285  
H -5.06245 -3.31630 -1.93565  
H -3.00149 -0.33969 -2.88283  
H -1.93211 -0.34554 -1.45470  
H -3.64269 0.09680 -1.28031  
H -2.43321 -2.74667 -3.44096  
H -2.65554 -4.02367 -2.20861  
H -1.33996 -2.83226 -2.03292  
H -1.35527 -4.12697 4.89859  
H -2.46702 -4.90160 3.74952  
H -2.90612 -3.35020 4.53105  
H 0.48856 -4.27429 3.26847  
H 0.34689 -3.54758 1.65569  
H -0.60947 -4.99244 2.05540  
H -0.07807 -2.02560 4.31776  
H -1.66768 -1.27186 4.01230  
H -0.39530 -1.21501 2.77292  
H 1.77071 -5.09146 -1.67713  
H 0.28051 -4.21993 -2.10122  
H 0.63502 -4.57736 -0.40244  
H 4.31311 -4.10322 1.50175  
H 2.90681 -4.83237 0.69615  
H 2.71743 -3.33561 1.64101  
H 5.55831 -4.15885 -0.61621  
H 5.03245 -3.26771 -2.05678  
H 4.20039 -4.76987 -1.58595  
H 5.34099 -1.99839 0.72147  
H 3.79546 -1.13243 0.79703  
H 4.74370 -1.12363 -0.70208  
H 0.95707 -1.03762 -4.54642  
H 0.44604 -0.70031 -2.88052  
H 0.13543 -2.29286 -3.59904  
H 2.75308 -2.70241 -5.03627  
H 2.02170 -3.94595 -4.00029  
H 3.71464 -3.46384 -3.75410  
H 3.28730 -0.39439 -4.14157  
H 4.26249 -1.10263 -2.83836  
H 2.94331 0.03159 -2.45386

## TS2<sup>M</sup>H<sub>2</sub>

Si -2.29558 -0.04618 -0.24063  
N 3.07022 -1.13389 -0.04465  
N 1.00939 0.00896 0.52972  
N 3.06655 1.09066 -0.04728  
C 3.78578 -3.47152 -0.41541  
H 4.09987 -3.27024 -1.45087  
H 3.43830 -4.51386 -0.36887  
H 4.66107 -3.38570 0.24633  
C 2.63482 -2.55224 0.02508  
C 2.24260 -0.02203 0.19345  
C -3.61542 -1.48789 -0.10157  
C -3.09226 -2.71761 -0.87479  
H -3.79509 -3.56324 -0.75996  
H -2.10849 -3.05493 -0.50914  
H -2.99570 -2.51539 -1.95348  
C -4.96995 -1.09366 -0.72409  
H -4.86985 -0.77504 -1.77461  
H -5.46735 -0.28467 -0.16964  
H -5.65498 -1.96165 -0.71158  
C -3.84421 -1.88563 1.37191  
H -4.58623 -2.70350 1.43440  
H -4.22734 -1.04967 1.97596  
H -2.92362 -2.24928 1.85475  
C -1.60508 -0.01867 -2.01045  
H -2.41987 0.02869 -2.75209  
H -1.00749 -0.91997 -2.21257  
H -0.95393 0.85476 -2.16686  
C -3.06038 1.72833 0.10318  
C -3.97382 2.18457 -1.05488  
H -4.85484 1.54242 -1.18595

## S92

H -3.43400 2.21496 -2.01516  
H -4.34506 3.20801 -0.85997  
C -3.84973 1.73848 1.42498  
H -4.18779 2.76412 1.66320  
H -3.23189 1.39119 2.26998  
H -4.74866 1.10498 1.38069  
C -1.91778 2.75731 0.21578  
H -2.33315 3.76229 0.41629  
H -1.33181 2.82904 -0.71256  
H -1.22056 2.52618 1.03705  
C 1.45086 -2.77230 -0.93636  
H 0.59826 -2.13290 -0.68205  
H 1.12240 -3.82236 -0.89451  
H 1.75473 -2.54439 -1.97015  
C 2.26714 -2.90142 1.47885  
H 3.14694 -2.78385 2.13079  
H 1.92295 -3.94539 1.54505  
H 1.47237 -2.25162 1.86199  
C 4.34248 -0.69412 -0.40553  
H 5.16309 -1.36648 -0.62047  
C 4.33796 0.65688 -0.41088  
H 5.15363 1.33299 -0.63319  
C 2.60234 2.50374 -0.03383  
C 1.52364 2.67453 -1.11768  
H 1.94958 2.47598 -2.11379  
H 1.12547 3.70070 -1.10545  
H 0.69936 1.97462 -0.94376  
C 3.77842 3.44001 -0.35091  
H 4.58593 3.35205 0.39226  
H 3.41527 4.47783 -0.32712  
H 4.19444 3.25858 -1.35353  
C 2.06109 2.86148 1.36240  
H 1.21378 2.22326 1.63399  
H 1.72918 3.91115 1.37764  
H 2.84929 2.73460 2.12102  
Si -0.46310 -0.26468 1.31795  
H -0.97738 -1.75986 0.61965  
H -0.61368 -1.79181 1.70388

## TS2<sup>M</sup>H<sub>2</sub>'

Si -0.52268 0.23550 1.57235  
Si -2.21436 -0.09160 -0.19693  
N 3.12988 -0.90066 -0.15476  
N 0.98733 -0.15485 0.61004  
N 2.79800 1.30096 -0.12339  
C 4.17851 -3.10840 -0.52454  
H 4.38626 -2.89734 -1.58444  
H 4.00647 -4.19032 -0.42892  
H 5.07055 -2.86081 0.07061  
C 2.92706 -2.36728 -0.02600  
C 2.17276 0.07726 0.17070  
C -3.11667 -1.82403 0.00352  
C -2.15640 -2.93176 -0.47843  
H -2.63692 -3.92215 -0.37115  
H -1.22686 -2.95979 0.10966  
H -1.88175 -2.81468 -1.53874  
C -4.39575 -1.89952 -0.85317  
H -4.20466 -1.66664 -1.91359  
H -5.17724 -1.21413 -0.49263  
H -4.81948 -2.92082 -0.81458  
C -3.48767 -2.10872 1.47342  
H -3.97922 -3.09625 1.55841  
H -4.18419 -1.36262 1.88333  
H -2.60195 -2.13260 2.12822  
C -1.42761 -0.07179 -1.93428  
H -2.11357 -0.47714 -2.69671  
H -0.50205 -0.66760 -1.94710  
H -1.16168 0.95321 -2.23624  
C -3.44400 1.43234 -0.11337  
C -4.33054 1.53644 -1.37107

H -5.00974 0.68022 -1.48397  
H -3.72891 1.60866 -2.29169  
H -4.95856 2.44614 -1.32000  
C -4.33535 1.35434 1.14038  
H -4.94064 2.27481 1.24126  
H -3.74067 1.25045 2.06352  
H -5.03952 0.50940 1.09657  
C -2.60515 2.72552 -0.02982  
H -3.27022 3.60643 0.04291  
H -1.97795 2.86918 -0.92330  
H -1.94632 2.74415 0.85474  
C 1.73460 -2.80220 -0.89918  
H 0.81339 -2.27988 -0.62222  
H 1.56493 -3.88499 -0.79797  
H 1.94044 -2.58044 -1.95793  
C 2.71826 -2.72996 1.45712  
H 3.60838 -2.45231 2.04284  
H 2.55708 -3.81382 1.56337  
H 1.85726 -2.21243 1.89513  
C 4.28389 -0.27858 -0.62648  
H 5.16451 -0.82333 -0.94147  
C 4.08327 1.05582 -0.60795  
H 4.76376 1.84361 -0.90377  
C 2.19234 2.64522 0.05835  
C 0.91844 2.74348 -0.79603  
H 1.16302 2.63069 -1.86362  
H 0.43118 3.71842 -0.64770  
H 0.20176 1.95842 -0.53674  
C 3.17553 3.72806 -0.41521  
H 4.10236 3.73272 0.17818  
H 2.69825 4.71092 -0.29134  
H 3.43219 3.61532 -1.47948  
C 1.89615 2.88178 1.55024  
H 1.16644 2.16310 1.95070  
H 1.48619 3.89312 1.69783  
H 2.82118 2.79148 2.14099  
H -0.42364 -1.55572 1.74037  
H 0.31210 -1.29546 1.17816

### INT2<sup>M</sup>H<sub>2</sub>

Si -2.25837 -0.00577 -0.22214  
N 3.00178 -1.11260 -0.14010  
N 1.01198 0.01093 0.63208  
N 3.01079 1.11063 -0.10677  
C 3.71357 -3.45773 -0.46754  
H 3.96665 -3.29540 -1.52638  
H 3.38008 -4.50034 -0.36208  
H 4.62366 -3.33733 0.13969  
C 2.58088 -2.53169 0.00231  
C 2.20489 -0.00176 0.18629  
C -3.35141 -1.61415 -0.04190  
C -2.47830 -2.81602 -0.46363  
H -3.04975 -3.75636 -0.35388  
H -1.57592 -2.91085 0.16111  
H -2.15532 -2.75051 -1.51473  
C -4.59338 -1.56713 -0.95256  
H -4.33656 -1.35899 -2.00431  
H -5.31513 -0.80343 -0.62442  
H -5.11968 -2.53967 -0.93046  
C -3.80799 -1.84041 1.41409  
H -4.37871 -2.78496 1.48919  
H -4.46351 -1.03639 1.77905  
H -2.95591 -1.91993 2.10729  
C -1.47672 -0.01781 -1.95781  
H -2.23676 -0.17799 -2.74006  
H -0.71682 -0.80746 -2.05209  
H -0.97714 0.94146 -2.16350  
C -3.24019 1.67343 -0.05101  
C -4.15025 1.91806 -1.27255  
H -4.93512 1.15528 -1.37595

H -3.57795 1.93914 -2.21401  
H -4.65656 2.89689 -1.17732  
C -4.09131 1.69541 1.23221  
H -4.54665 2.69325 1.37374  
H -3.49124 1.47818 2.13150  
H -4.91602 0.96737 1.19205  
C -2.22146 2.83155 0.01519  
H -2.75352 3.79654 0.10916  
H -1.60415 2.89241 -0.89437  
H -1.54279 2.74758 0.87835  
C 1.34465 -2.78689 -0.87809  
H 0.51679 -2.13200 -0.58995  
H 1.01329 -3.83159 -0.77623  
H 1.58207 -2.59780 -1.93674  
C 2.28651 -2.83223 1.48314  
H 3.18598 -2.65452 2.09335  
H 1.98979 -3.88606 1.60165  
H 1.47641 -2.20259 1.86734  
C 4.23719 -0.67343 -0.61111  
H 5.02656 -1.34583 -0.92191  
C 4.24141 0.67805 -0.59277  
H 5.03435 1.35424 -0.88616  
C 2.57539 2.52551 0.03368  
C 1.38407 2.77534 -0.90739  
H 1.68309 2.61442 -1.95515  
H 1.02246 3.80967 -0.80153  
H 0.56178 2.09233 -0.67169  
C 3.72613 3.46298 -0.36245  
H 4.60775 3.32734 0.28276  
H 3.38643 4.50269 -0.24827  
H 4.02782 3.32704 -1.41220  
C 2.19771 2.80834 1.49958  
H 1.36572 2.17579 1.82802  
H 1.90018 3.86258 1.61193  
H 3.05986 2.61953 2.15850  
Si -0.48879 -0.10814 1.37978  
H -0.62455 -1.38547 2.17051  
H -0.68096 0.97716 2.40858

### INT2<sup>M</sup>H<sub>2</sub>'

Si -0.50578 0.36161 1.45928  
Si -2.28782 -0.06169 -0.14608  
N 3.19089 -0.85602 -0.07101  
N 0.89792 -0.17001 0.17187  
N 2.79863 1.32816 -0.02638  
C 4.38438 -3.02116 -0.06676  
H 4.91184 -2.80649 -1.00844  
H 4.23913 -4.10913 -0.01043  
H 5.02316 -2.72785 0.77940  
C 3.00625 -2.34254 -0.00656  
C 2.18994 0.09449 0.03925  
C -2.96082 -1.90856 -0.04897  
C -1.79590 -2.83042 -0.47135  
H -2.10373 -3.89196 -0.41888  
H -0.92946 -2.71617 0.20155  
H -1.46390 -2.63955 -1.50533  
C -4.15028 -2.16463 -0.99264  
H -3.93843 -1.86513 -2.03212  
H -5.05233 -1.62530 -0.66604  
H -4.40710 -3.24136 -1.00817  
C -3.37408 -2.29295 1.38484  
H -3.66497 -3.36019 1.42815  
H -4.23629 -1.70847 1.73909  
H -2.55007 -2.14445 2.10005  
C -1.63821 0.14416 -1.93972  
H -2.34838 -0.25820 -2.68101  
H -0.67131 -0.36273 -2.08245  
H -1.48017 1.20814 -2.17561  
C -3.67815 1.30621 0.04864  
C -4.67884 1.30891 -1.12366

H -5.26016 0.37783 -1.18536  
H -4.17570 1.45195 -2.09382  
H -5.40325 2.13767 -1.00716  
C -4.44497 1.12672 1.37204  
H -5.12839 1.97988 1.54439  
H -3.76412 1.07194 2.23852  
H -5.06206 0.21459 1.36993  
C -2.97908 2.68355 0.07697  
H -3.73057 3.48920 0.18025  
H -2.41855 2.88361 -0.85149  
H -2.27379 2.77071 0.91817  
C 2.19165 -2.82008 -1.22590  
H 1.16194 -2.43859 -1.24604  
H 2.12222 -3.91796 -1.21541  
H 2.68417 -2.51166 -2.16065  
C 2.33644 -2.72956 1.32678  
H 2.95845 -2.39786 2.17211  
H 2.23658 -3.82412 1.37950  
H 1.33846 -2.29340 1.45949  
C 4.41494 -0.19883 -0.17884  
H 5.35947 -0.71631 -0.28020  
C 4.17563 1.12850 -0.13353  
H 4.88206 1.94601 -0.17820  
C 2.16725 2.69847 -0.06367  
C 0.87395 2.67124 -0.89290  
H 1.04935 2.23236 -1.88668  
H 0.51990 3.70405 -1.02482  
H 0.07387 2.11226 -0.39981  
C 3.14612 3.66778 -0.75312  
H 4.05709 3.84386 -0.16221  
H 2.64693 4.64064 -0.86236  
H 3.43049 3.31641 -1.75711  
C 1.90783 3.17150 1.37417  
H 1.18545 2.50874 1.87702  
H 1.48867 4.18990 1.35933  
H 2.84746 3.91135 1.94954  
H -0.52420 -1.06050 2.04714  
H 0.70403 -1.12430 -0.10038

### TSINT2<sup>M</sup>

Si -1.13786 -0.30846 0.63060  
Si 0.59654 1.19504 0.12998  
Si -3.25051 0.42994 1.47741  
Si 1.10560 2.84575 -1.58068  
N -1.40959 -1.73314 -0.26694  
N -1.22603 -3.54767 -1.79372  
N -0.40840 -3.90930 0.24608  
N 2.03865 0.36428 0.46340  
N 3.75455 -1.29061 -0.01050  
N 3.90042 -0.11230 1.87713  
C -1.03574 -2.92774 -0.54855  
C -0.72341 -4.84253 -1.75337  
C -0.22382 -5.06211 -0.51765  
C -2.05533 -2.97502 -2.89236  
C -2.04232 -3.92815 -4.09685  
C -3.50002 -2.82158 -2.38440  
C -1.47537 -1.62365 -3.33733  
C -0.03940 -3.78877 1.68898  
C 0.46636 -5.14665 2.20514  
C 1.08562 -2.75690 1.87169  
C -1.28544 -3.40747 2.50643  
C -4.16514 -1.20824 1.82249  
C -3.00030 1.30980 3.20252  
C -4.29472 1.22483 4.03968  
C -1.88270 0.57026 3.96917  
C -2.59488 2.78752 3.05310  
C -4.35046 1.40684 0.19419  
C -4.57113 0.47569 -1.01584  
C -3.66227 2.68440 -0.30727  
C -5.71889 1.77926 0.79755

|   |          |          |          |   |          |          |          |
|---|----------|----------|----------|---|----------|----------|----------|
| C | 3.11958  | -0.25884 | 0.71313  | H | 4.75465  | -0.15118 | -2.22375 |
| C | 4.87977  | -1.71828 | 0.69635  | H | 3.05890  | 0.34913  | -2.02392 |
| C | 4.96236  | -1.00957 | 1.84321  | H | 4.42188  | 1.44101  | 4.87303  |
| C | 3.44095  | -1.68834 | -1.41108 | H | 5.66511  | 0.97206  | 3.69478  |
| C | 4.34774  | -2.85192 | -1.84076 | H | 4.68645  | -0.27888 | 4.52334  |
| C | 1.98232  | -2.15421 | -1.53472 | H | 3.37664  | 2.99293  | 3.23172  |
| C | 3.70770  | -0.47975 | -2.31602 | H | 2.86719  | 2.40409  | 1.63140  |
| C | 3.58979  | 0.83825  | 2.97743  | H | 4.60017  | 2.51824  | 2.01963  |
| C | 4.66114  | 0.72529  | 4.07310  | H | 1.97660  | 1.19750  | 4.39850  |
| C | 3.60631  | 2.27644  | 2.42815  | H | 2.24602  | -0.52629 | 4.02174  |
| C | 2.22086  | 0.48774  | 3.59306  | H | 1.42256  | 0.52125  | 2.84323  |
| C | 2.99522  | 2.96352  | -1.85675 | H | 3.28952  | 4.00174  | -2.07752 |
| C | 0.62249  | 4.59830  | -0.83391 | H | 3.33041  | 2.34366  | -2.69989 |
| C | 1.52903  | 4.84187  | 0.39385  | H | 3.54675  | 2.63579  | -0.96223 |
| C | 0.86636  | 5.73355  | -1.84831 | H | 1.30345  | 5.82974  | 0.83701  |
| C | -0.84161 | 4.67507  | -0.36883 | H | 2.59978  | 4.83799  | 0.13654  |
| C | 0.30385  | 2.43330  | -3.31492 | H | 1.36777  | 4.09134  | 1.18239  |
| C | 0.79558  | 1.02931  | -3.72263 | H | 0.74514  | 6.71424  | -1.35136 |
| C | 0.75078  | 3.42352  | -4.40920 | H | 0.14448  | 5.70412  | -2.67784 |
| C | -1.23431 | 2.41140  | -3.25290 | H | 1.87864  | 5.71298  | -2.28260 |
| H | -0.93020 | 0.96173  | -0.47848 | H | -1.04342 | 5.66048  | 0.09182  |
| H | 0.10184  | 2.10106  | 1.23339  | H | -1.07639 | 3.90971  | 0.38267  |
| H | 0.26321  | -5.95107 | -0.13938 | H | -1.55101 | 4.55642  | -1.20045 |
| H | -0.73803 | -5.51224 | -2.60385 | H | 0.26900  | 0.69015  | -4.63355 |
| H | -2.63098 | -3.47514 | -4.90777 | H | 0.61474  | 0.27551  | -2.94236 |
| H | -2.49818 | -4.90226 | -3.86344 | H | 1.87133  | 1.02230  | -3.94966 |
| H | -1.02171 | -4.09291 | -4.47619 | H | 0.40985  | 3.06973  | -5.40045 |
| H | -4.13434 | -2.37350 | -3.16487 | H | 1.84743  | 3.52369  | -4.45818 |
| H | -3.52457 | -2.17423 | -1.50043 | H | 0.32929  | 4.42762  | -4.26286 |
| H | -3.91805 | -3.80504 | -2.11681 | H | -1.65203 | 2.13700  | -4.23974 |
| H | -2.08388 | -1.20285 | -4.15249 | H | -1.65587 | 3.39115  | -2.98226 |
| H | -0.44715 | -1.75062 | -3.70624 | H | -1.60638 | 1.67488  | -2.52509 |
| H | -1.46026 | -0.91065 | -2.50670 |   |          |          |          |
| H | 0.71020  | -5.04236 | 3.27221  |   |          |          |          |
| H | 1.38408  | -5.46942 | 1.69073  |   |          |          |          |
| H | -0.29492 | -5.93613 | 2.11136  |   |          |          |          |
| H | 1.32083  | -2.64980 | 2.94169  |   |          |          |          |
| H | 0.80540  | -1.76543 | 1.49382  |   |          |          |          |
| H | 2.00179  | -3.07229 | 1.35199  |   |          |          |          |
| H | -1.03434 | -3.36906 | 3.57725  |   |          |          |          |
| H | -2.08619 | -4.14853 | 2.35920  |   |          |          |          |
| H | -1.67468 | -2.42763 | 2.21618  |   |          |          |          |
| H | -5.24677 | -1.03737 | 1.94457  |   |          |          |          |
| H | -3.79831 | -1.68692 | 2.74303  |   |          |          |          |
| H | -4.01518 | -1.91759 | 0.99475  |   |          |          |          |
| H | -4.13911 | 1.70506  | 5.02376  |   |          |          |          |
| H | -4.59696 | 0.18297  | 4.23109  |   |          |          |          |
| H | -5.14277 | 1.73534  | 3.55984  |   |          |          |          |
| H | -1.78886 | 0.98100  | 4.99175  |   |          |          |          |
| H | -0.90528 | 0.67736  | 3.47489  |   |          |          |          |
| H | -2.08677 | -0.50913 | 4.06960  |   |          |          |          |
| H | -2.36011 | 3.22087  | 4.04313  |   |          |          |          |
| H | -3.40266 | 3.39561  | 2.61771  |   |          |          |          |
| H | -1.70101 | 2.90771  | 2.42118  |   |          |          |          |
| H | -5.17666 | 0.99020  | -1.78483 |   |          |          |          |
| H | -5.10476 | -0.44820 | -0.74307 |   |          |          |          |
| H | -3.61781 | 0.18679  | -1.48539 |   |          |          |          |
| H | -4.26020 | 3.15273  | -1.11120 |   |          |          |          |
| H | -2.66958 | 2.46581  | -0.72054 |   |          |          |          |
| H | -3.53514 | 3.43568  | 0.48430  |   |          |          |          |
| H | -6.36544 | 2.22651  | 0.01968  |   |          |          |          |
| H | -5.62350 | 2.52395  | 1.60297  |   |          |          |          |
| H | -6.25677 | 0.90773  | 1.20430  |   |          |          |          |
| H | 5.53625  | -2.50225 | 0.34199  |   |          |          |          |
| H | 5.69997  | -1.08781 | 2.63198  |   |          |          |          |
| H | 4.06002  | -3.15863 | -2.85704 |   |          |          |          |
| H | 4.22900  | -3.72651 | -1.18256 |   |          |          |          |
| H | 5.41022  | -2.56728 | -1.87068 |   |          |          |          |
| H | 1.74222  | -2.34366 | -2.59133 |   |          |          |          |
| H | 1.28361  | -1.40499 | -1.15317 |   |          |          |          |
| H | 1.81779  | -3.08760 | -0.98092 |   |          |          |          |
| H | 3.50671  | -0.72819 | -3.36908 |   |          |          |          |

## 4 References

- S1. Fulmer, G. R.; Miller, A. J. M.; Sherden, N. H.; Gottlieb, H. E.; Nudelman, A.; Stoltz, B. M.; Bercaw, J. E.; Goldberg, K. I., NMR Chemical Shifts of Trace Impurities: Common Laboratory Solvents, Organics, and Gases in Deuterated Solvents Relevant to the Organometallic Chemist. *Organometallics* **2010**, *29* (9), 2176-2179.
- S2. Stoll, S.; Schweiger, A., EasySpin, a comprehensive software package for spectral simulation and analysis in EPR. *J. Magn. Reson.* **2006**, *178* (1), 42-55.
- S3. Wendel, D.; Szilvási, T.; Jandl, C.; Inoue, S.; Rieger, B., Twist of a Silicon–Silicon Double Bond: Selective *Anti*-Addition of Hydrogen to an Iminodisilene. *J. Am. Chem. Soc.* **2017**, *139* (27), 9156-9159.
- S4. Wiberg, N.; Amelunxen, K.; Lerner, H. W.; Schuster, H.; Nöth, H.; Krossing, I.; Schmidt-Amelunxen, M.; Seifert, T., Donorfreie und donorhaltige supersilylalkalimetalle tBu<sub>3</sub>SiM: Synthesen, Charakterisierung, Strukturen. *J. Organomet. Chem.* **1997**, *542* (1), 1-18.
- S5. Sekiguchi, A.; Fukawa, T.; Nakamoto, M.; Lee, V. Y.; Ichinohe, M., Isolable Silyl and Gerymyl Radicals Lacking Conjugation with  $\pi$ -Bonds: Synthesis, Characterization, and Reactivity. *J. Am. Chem. Soc.* **2002**, *124* (33), 9865-9869.
- S6. Jia, L.; Yang, X.; Ishihara, A.; Marks, T. J., Protected (Fluoroaryl)borates as Effective Counteranions for Cationic Metallocene Polymerization Catalysts. *Organometallics* **1995**, *14* (7), 3135-3137.
- S7. Fredenhagen, K.; Cadenbach, G., Die Bindung von Kalium durch Kohlenstoff. *Z. Anorg. Allg. Chem.* **1926**, *158* (1), 249-263.
- S8. Wendel, D.; Szilvási, T.; Henschel, D.; Altmann, P. J.; Jandl, C.; Inoue, S.; Rieger, B., Precise Activation of Ammonia and Carbon Dioxide by an Iminodisilene. *Angew. Chem., Int. Ed.* **2018**, *57* (44), 14575-14579.
- S9. *APEX 3 version 2015.5-2*; Bruker AXS Inc.: Madison, Wisconsin, USA, 2015.
- S10. *Version 7.56a and SADABS Version 2008/1*; Bruker AXS Inc.: Madison, Wisconsin, USA, 2008.
- S11. Sheldrick, G. M. *SHELXL-2014*, University of Göttingen, Göttingen, Germany: 2014.
- S12. Hübschle, C. B.; Sheldrick, G. M.; Dittrich, B., ShelXle: a Qt graphical user interface for SHELXL. *Journal of Applied Crystallography* **2011**, *44* (6), 1281-1284.
- S13. Sheldrick, G. M. *SHELXL-97*, University of Göttingen, Göttingen, Germany: 1998.
- S14. Wilson, A. J. C., In *International Tables for Crystallography*, Kluwer Academic Publishers: Dordrecht, The Netherlands: 1992; Vol. Volume C, Tables 6.1.1.4 (pp. 500-502), 4.2.6.8 (pp. 219-222), and 4.2.4.2 (pp. 193-199).
- S15. Macrae, C. F.; Sovago, I.; Cottrell, S. J.; Galek, P. T. A.; McCabe, P.; Pidcock, E.; Platings, M.; Shields, G. P.; Stevens, J. S.; Towler, M.; Wood, P. A., Mercury 4.0: from visualization to analysis, design and prediction. *J. Appl. Crystallogr.* **2020**, *53* (1), 226-235.
- S16. Frisch, M. J.; Trucks, G. W.; Schlegel, H. B.; Scuseria, G. E.; Robb, M. A.; Cheeseman, J. R.; Scalmani, G.; Barone, V.; Petersson, G. A.; Nakatsuji, H.; Li, X.; Caricato, M.; Marenich, A. V.; Bloino, J.; Janesko, B. G.; Gomperts, R.; Mennucci, B.; Hratchian, H. P.; Ortiz, J. V.; Izmaylov, A. F.; Sonnenberg, J. L.; Williams; Ding, F.; Lipparini, F.; Egidi, F.; Goings, J.; Peng, B.; Petrone, A.; Henderson, T.; Ranasinghe, D.; Zakrzewski, V. G.; Gao, J.; Rega, N.; Zheng, G.; Liang, W.; Hada, M.; Ehara, M.; Toyota, K.; Fukuda, R.; Hasegawa, J.; Ishida, M.; Nakajima, T.; Honda, Y.; Kitao, O.; Nakai, H.; Vreven, T.; Throssell, K.; Montgomery Jr., J. A.; Peralta, J. E.; Ogliaro, F.; Bearpark, M. J.; Heyd, J. J.; Brothers, E. N.; Kudin, K. N.; Staroverov, V. N.; Keith, T. A.; Kobayashi, R.; Normand, J.; Raghavachari, K.; Rendell, A. P.; Burant, J. C.; Iyengar, S. S.; Tomasi, J.; Cossi, M.; Millam, J. M.; Klene, M.; Adamo, C.; Cammi, R.; Ochterski, J. W.; Martin, R. L.; Morokuma, K.; Farkas, O.; Foresman, J. B.; Fox, D. J. *Gaussian 16 Rev. B.01*, Gaussian, Inc. : Wallingford, CT, 2016.
- S17. Grimme, S.; Antony, J.; Ehrlich, S.; Krieg, H., A consistent and accurate ab initio parametrization of density functional dispersion correction (DFT-D) for the 94 elements H-Pu. *J. Chem. Phys.* **2010**, *132* (15), 154104.
- S18. Becke, A. D., Density-functional thermochemistry. III. The role of exact exchange. *J. Chem. Phys.* **1993**, *98* (7), 5648-5652.

- S19. Lee, C.; Yang, W.; Parr, R. G., Development of the Colle-Salvetti correlation-energy formula into a functional of the electron density. *Phys. Rev. B* **1988**, *37* (2), 785-789.
- S20. Stephens, P. J.; Devlin, F. J.; Chabalowski, C. F.; Frisch, M. J., Ab Initio Calculation of Vibrational Absorption and Circular Dichroism Spectra Using Density Functional Force Fields. *J. Phys. Chem.* **1994**, *98* (45), 11623-11627.
- S21. Vosko, S. H.; Wilk, L.; Nusair, M., Accurate spin-dependent electron liquid correlation energies for local spin density calculations: a critical analysis. *Can. J. Phys.* **1980**, *58* (8), 1200-1211.
- S22. Weigend, F.; Ahlrichs, R., Balanced basis sets of split valence, triple zeta valence and quadruple zeta valence quality for H to Rn: Design and assessment of accuracy. *Phys. Chem. Chem. Phys.* **2005**, *7* (18), 3297-3305.
- S23. Wheeler, S. E.; Houk, K. N., Integration Grid Errors for Meta-GGA-Predicted Reaction Energies: Origin of Grid Errors for the M06 Suite of Functionals. *J. Chem. Theory Comput.* **2010**, *6* (2), 395-404.
- S24. Fukui, K., The path of chemical reactions - the IRC approach. *Acc. Chem. Res.* **1981**, *14* (12), 363-368.
- S25. Neese, F., The ORCA program system. *WIREs Comput Mol Sci* **2012**, *2* (1), 73-78.
- S26. Neese, F., Software update: the ORCA program system, version 4.0. *WIREs Comput Mol Sci* **2018**, *8* (1), e1327.
- S27. Riplinger, C.; Neese, F., An efficient and near linear scaling pair natural orbital based local coupled cluster method. *J. Chem. Phys.* **2013**, *138* (3), 034106.
- S28. Riplinger, C.; Sandhoefer, B.; Hansen, A.; Neese, F., Natural triple excitations in local coupled cluster calculations with pair natural orbitals. *J. Chem. Phys.* **2013**, *139* (13), 134101.
- S29. Baerends, E. J.; Ziegler, T.; Atkins, A. J.; Autschbach, J.; Bashford, D.; Baseggio, O.; Bérces, A.; Bickelhaupt, F. M.; Bo, C.; Boerritger, P. M. *ADF2019, SCM, Theoretical Chemistry*, Vrije Universiteit, Amsterdam, The Netherlands, <https://www.scm.com>, 2019.
- S30. te Velde, G.; Bickelhaupt, F. M.; Baerends, E. J.; Fonseca Guerra, C.; van Gisbergen, S. J. A.; Snijders, J. G.; Ziegler, T., Chemistry with ADF. *J. Comput. Chem.* **2001**, *22* (9), 931-967.
- S31. Schweizer, J. I.; Scheibel, M. G.; Diefenbach, M.; Neumeyer, F.; Würtele, C.; Kulminkaya, N.; Linsler, R.; Auner, N.; Schneider, S.; Holthausen, M. C., A Disilene Base Adduct with a Dative Si-Si Single Bond. *Angew. Chem., Int. Ed.* **2016**, *55* (5), 1782-1786.
- S32. Stanford, M. W.; Schweizer, J. I.; Menche, M.; Nichol, G. S.; Holthausen, M. C.; Cowley, M. J., Intercepting the Disilene-Silylsilylene Equilibrium. *Angew. Chem., Int. Ed.* **2019**, *58* (5), 1329-1333.
- S33. Zhao, Y.; Truhlar, D. G., The M06 suite of density functionals for main group thermochemistry, thermochemical kinetics, noncovalent interactions, excited states, and transition elements: two new functionals and systematic testing of four M06-class functionals and 12 other functionals. *Theo. Chem. Acc.* **2008**, *120* (1), 215-241.
- S34. Krishnan, R.; Binkley, J. S.; Seeger, R.; Pople, J. A., Self-consistent molecular orbital methods. XX. A basis set for correlated wave functions. *J. Chem. Phys.* **1980**, *72* (1), 650-654.
- S35. McLean, A. D.; Chandler, G. S., Contracted Gaussian basis sets for molecular calculations. I. Second row atoms, Z=11-18. *J. Chem. Phys.* **1980**, *72* (10), 5639-5648.
- S36. Zhikol, O. A.; Oshkalo, A. F.; Shishkin, O. V.; Prezhdo, O. V., Non-nuclear attractors on Si-Si bond in quantum-chemical modeling as basis set inadequacy. *Chem. Phys.* **2003**, *288* (2), 159-169.
- S37. Glendening, E. D.; Badenhop, J. K.; Reed, A. E.; Carpenter, J. E.; Bohmann, J. A.; Morales, C. M.; Landis, C. R.; Weinhold, F. *NBO 6.0*, Theoretical Chemistry Institute, University of Wisconsin, Madison, **2013**.
- S38. Glendening Eric, D.; Landis Clark, R.; Weinhold, F., NBO 6.0: Natural bond orbital analysis program. *J. Chem. Theory Comput.* **2013**, *34* (16), 1429-1437.
- S39. Glendening Eric, D.; Landis Clark, R.; Weinhold, F., Natural bond orbital methods. *WIREs Comput Mol Sci* **2011**, *2* (1), 1-42.
- S40. Keith, T. A. *AIMAll (Version 19.02.13)*, TK Gristmill Software, Overland Park KS, USA, **2019**.
- S41. Lu, T., Multiwfn 3.5 - A Multifunctional Wavefunction Analyzer. *School of Chemical and Biological Engineering, University of Science and Technology, Beijing* **2018**.
- S42. Lu, T.; Chen, F., Multiwfn: A multifunctional wavefunction analyzer. *J. Comput. Chem.* **2012**, *33* (5), 580-592.
- S43. Bader, R. F. W., *Atoms in Molecules: A Quantum Theory*. Oxford Univ. Press: Oxford, 1990.



- S44. Macchi, P.; Sironi, A., Interactions involving Metals - From 'Chemical Categories' to QTAIM, and Backwards. In *The Quantum Theory of Atoms in Molecules*, Matta, C. F.; Boyd, R. J., Eds. Wiley-VCH: Weinheim, **2007**.
- S45. Marenich, A. V.; Cramer, C. J.; Truhlar, D. G., Universal Solvation Model Based on Solute Electron Density and on a Continuum Model of the Solvent Defined by the Bulk Dielectric Constant and Atomic Surface Tensions. *J. Phys. Chem. B* **2009**, *113* (18), 6378-6396.
- S46. Andrienko, G. A. *ChemCraft - graphical software for visualization of quantum chemistry computations*, <http://www.chemcraftprog.com>, **2015**.
- S47. Legault, C. Y. *Cylview 1.0b*, Université de Sherbrooke, <http://www.cylview.org>, 2009.
- S48. UCSF Chimera 1.15.0 *Molecular graphics and analyses developed by the Resource for Biocomputing, Visualization and Informatics at the University of California with support from NIH P41-GM103311*, <https://www.rbvi.ucsf.edu/chimera> San Francisco, 2020.
- S49. Dennington, R.; Keith, T. A.; Millam, J. M. *GaussView5*, Version 5; Semichem Inc.: Shawnee Mission, KS, 2009.
- S50. Yokelson, H. B.; Siegel, D. A.; Millevolte, A. J.; Maxka, J.; West, R., 1,2-Diaryl Rearrangement in Tetraaryldisilenes. *Organometallics* **1990**, *9* (4), 1005-1010.
- S51. Kira, M., Bonding and structure of disilenes and related unsaturated group-14 element compounds. *Proc. Jpn. Acad., Ser. B* **2012**, *88* (5), 167-191.
- S52. Driess, M.; Grützmacher, H., Main Group Element Analogues of Carbenes, Olefins, and Small Rings. *Angew. Chem., Int. Ed. Engl.* **1996**, *35* (8), 828-856.
- S53. Fischer, R. C.; Power, P. P.,  $\pi$ -Bonding and the Lone Pair Effect in Multiple Bonds Involving Heavier Main Group Elements: Developments in the New Millennium. *Chem. Rev.* **2010**, *110* (7), 3877-3923.
- S54. Zhao, L.; von Hopffgarten, M.; Andrada, D. M.; Frenking, G., Energy decomposition analysis. *WIREs Comput. Mol. Sci.* **2018**, *8*:e1345, doi: 10.1002/wcms.1345.
- S55. Schneider, W. B.; Bistoni, G.; Sparta, M.; Saitow, M.; Riplinger, C.; Auer, A. A.; Neese, F., Decomposition of Intermolecular Interaction Energies within the Local Pair Natural Orbital Coupled Cluster Framework. *J. Chem. Theory Comput.* **2016**, *12* (10), 4778-4792.
- S56. Neese, F.; Wennmohs, F.; Hansen, A.; Becker, U., Efficient, approximate and parallel Hartree–Fock and hybrid DFT calculations. A 'chain-of-spheres' algorithm for the Hartree–Fock exchange. *Chem. Phys.* **2009**, *356* (1), 98-109.
- S57. Bistoni, G., Personal communication via ORCA user forum <https://orcaforum.kofo.mpg.de/viewtopic.php?t=6718>, **2020**.
- S58. Lu, Q.; Neese, F.; Bistoni, G., Formation of Agostic Structures Driven by London Dispersion. *Angew. Chem., Int. Ed.* **2018**, *57* (17), 4760-4764.
- S59. Wuttke, A.; Mata, R. A., Visualizing dispersion interactions through the use of local orbital spaces. *J. Comput. Chem.* **2017**, *38* (1), 15-23.
- S60. Grimme, S.; Brandenburg, J. G.; Bannwarth, C.; Hansen, A., Consistent structures and interactions by density functional theory with small atomic orbital basis sets. *J. Chem. Phys.* **2015**, *143* (5), 054107.
- S61. Falivene, L.; Cao, Z.; Petta, A.; Serra, L.; Poater, A.; Oliva, R.; Scarano, V.; Cavallo, L., Towards the online computer-aided design of catalytic pockets. *Nat. Chem.* **2019**, *11* (10), 872-879.
- S62. Poater, A.; Ragone, F.; Mariz, R.; Dorta, R.; Cavallo, L., Comparing the Enantioselective Power of Steric and Electrostatic Effects in Transition-Metal-Catalyzed Asymmetric Synthesis. *Chem. Eur. J.* **2010**, *16* (48), 14348-14353.
